# Supplementary material for: Global analyses of UPF1 binding and function reveal expanded scope of nonsense-mediated mRNA decay
Source: HighWire-hosted journal article supplement (doi:10.1101/gr.157354.113), 2013-06-13
Supplement: Supplemental_Material.docx [file Supplemental_Material.docx]

**Supplemental Material Index**

**Supplemental Methods**

**Supplemental Figure legends**

**Figure S1.** Derivation of mESCs stably depleted of UPF1 and changes in gene expression associated with 3' UTR length and dEJ status upon NMD-inhibition, related to Fig. 1.

**Figure S2.** Correlation of ribosome footprint densities of uORFs calculated in UPF1- and control-depleted mESCs, related to Fig. 2.

**Figure S3.** UPF1 CLIP read densities and specificity of UPF1 binding, related to Fig. 3.

**Figure S4.** UPF1 binding in 3' UTRs of varying lengths is associated with mRNA repression, related to Fig. 4.

**Figure S5.** NMD features that regulate isoform abundance, related to Fig. 6.

**Supplemental Table Legends**

**Table S1.** Summary of sequencing library read counts, related to Figs. 1-3.

**Table S2.** Consistently behaving genes and isoforms, related to Figs. 1-2,4-6.

**Table S3.** Enrichment for transcriptional regulators in genes that are de-repressed following NMD-inhibition, related to Fig. 1-6.

**Table S4.** Translational classification of uORFs, related to Fig. 2.

**Table S5.** UPF1-bound 3' UTRs and CDS, related to Fig. 4.

**Supplementary References**

**Supplementary Methods**

**Stable knockdown of UPF1.** shRNAs used were as follows: *Upf1* shRNA-1: clone TRCN0000009664, 5'-CCGG-GCTGCCATGAACATCCCTATT-CTCGAG-AATAGGGATGTTCATGGCAGC-TTTTT-3', *Upf1* shRNA-2: clone TRCN0000274486, 5'-CCGG-AGCTATGTGGCTTAGTCTATC-CTCGAG-GATAGACTAAGCCACATAGCT-TTTTTG-3', GFP shRNA: clone TRCN0000072181, 5'-CCGG-ACAACAGCCACAACGTCTATA-CTCGAG-TATAGACGTTGTGGCTGTTGT-TTTTTG-3'.

**Quantitation of UPF1 protein and *Upf1* mRNA.** An aliquot ofcells that were harvested for RNA-seq analysis were lysed (50mM Tris HCl pH 7.7, 0.1% SDS, 1% NP40, 0.25% sodium deoxycholate, 150mM NaCl, 1mM EDTA), spun for 30 min. at 4º C, and the soluble fraction was snap frozen using liquid N2. To determine knockdown efficiency of UPF1 protein in each sample, protein concentrations were determined by Bradford assay and equivalent amounts of protein were loaded onto Bis-Tris SDS-PAGE gels (Invitrogen) and separated by molecular weight. Proteins were transferred to nitrocellulose using either wet transfer or the iBlot apparatus (Invitrogen), and blots were blocked in 5% milk/0.1% Tween 20 in PBS solution and probed with rabbit anti-UPF1 (Bethyl laboratories) or mouse anti-Gapdh1 antibodies followed by HRP-conjugated anti-mouse and anti-rabbit secondary antibodies. Protein signal was detected using SuperSignal West Femto ECL reagent (ThermoScientific) and exposure to film. Bands were quantified using Image J software by normalizing [UPF1]/[GAPDH1] signal. Results were averaged for 3 different experiments (generated from initial cells) and plotted with standard error in Fig. S1A. For mRNA levels, total RNA was harvested from a similar aliquot of cells by Trizol (Invitrogen) extraction. cDNA was generated using oligo-dT priming and used in real-time PCR reactions with primers (written 5’-3’) targeting either *Upf1* (F-AGACCACCCTTCCCAACAGC, R- GAGGTAGCTGTCCTGGGACAGTTC) or *Hprt* (F-GCAGTACAGCCCCAAAATGG, R- GGTCCTTTTCACCAGCAAGCT) mRNAs. Ratios plotted in Fig. S1B were calculated using the delta Ct values of *Upf1* and *Hprt* and normalized to those values in cell line 2.4 or wildtype v6.5 cells.

**Immunofluorescence.** Wildtype v6.5 or knockdown clones were cultured on MEFs on glass coverslips for 48hours without puromycin prior to fixation with 4% paraformaldehyde/PBS 20’ at room temperature, permeabilization with 0.2% Triton X-100/0.1% Tween-20 in PBS for 1hr at room temperature, and blocking with 0.1% Tween-20/2% FBS in PBS. Coverslips were stained with mouse anti-OCT4 antibodies (1:100, Santa-Cruz No. 5279). Cells were washed in blocking solution, stained with Alexa-488 conjugated secondary donkey anti-mouse (Invitrogen), mounted using Vectashield, and visualized using a inverted light microscope (Nikon Eclipse Ti). Images were processed for figures using Adobe Photoshop CS4 software.

**AP staining.** Cells were cultured as described for immunofluorescence analysis and then stained for alkaline phosphatase as per manufacturers instructions (Millipore). Images were captured using a light microscope (Nikon) and digital camera.

**UPF1 CLIP-seq.** Three 15cm plates of UV irradiated, snap frozen cells were resuspended in 2ml of lysis buffer (50mM Tris 7.4, 100mM NaCl, 1% NP40, 0.5% NaDOC, and protease inhibitors), split into 8x250ul aliquots, and incubated for 30 min. on ice. After DNAse treatment (5ul TURBO DNAse, Ambion) for 10 min. at 37º C, dilutions of RNaseIf (NEB) or RNaseA (10mg/ml, Fermentas) were added to each sample to yield final RNase concentrations of 1:1K-1:10K (for RNaseIf) or 1:10K-1:90K (for RNaseA). Samples were incubated at 37º C with shaking for 10 min. after which digestions were quenched with the addition of RNaseOUT (Invitrogen). Samples were spun twice at 4º C, 14K RPM, 10 min. and supernatant was recovered. Lysates were pre-cleared for 30 min. at 4deg using a 1:1 protein A:protein G DYNAbead (Invitrogen) slurry. Cleared lysate was recovered and 1.6ug of rabbit anti-RENT1 (Cat. No. A301-902A Bethyl Laboratories Inc.) or 2ug of rabbit IgG (Upstate Antibodies) was added to respective lysates and incubated for 2 hours at 4º C. Equivalent of 50ul beads was then added to each lysate and incubated for an additional 2 hours at 4º C. IPs were washed 3x in wash buffer (50mM Tris 7.4, 1M NaCl, 1% NP40, 0.1% SDS, 0.5% NaDOC, and protease inhibitors), followed by 2x in PNK buffer (50mM Tris7.4, 10mM MgCl2, 0.5% NP40). Like IPs were combined (2/sample) and CIP treated. Samples were then washed 3x in PNK+ buffer (50mM TrisHCl 7.4, 20mM EGTA, 0.5% NP40), followed by 3x in PNK buffer. 3’linker ligation was performed at 16º C overnight using either:

/5Phos/TCGTATGCCGTCTTCTGCTTGT/ddC/ (libraries Upf1.A1, Upf1.I, IgG.A1, IgG.I)

or

/5Phos/TGGAATTCTCGGGTGCCAAGG/3ddC/ (for use with multi-plexing: libraries Upf1.A2, Upf1.CHX.A1, Upf1.CHX.A2, IgG.A2, IgG.CHX.A1, IgG.CHX.A2).

Both 3' linkers were pre-adenylated using in-house synthesized ImpA ([Lau et al. 2001](#_ENREF_6)) to improve efficiency of ligations. Ligations were then washed 3X in PNK buffer, and radiolabeld using P32 γ-ATP. Samples were then washed a final 3X and resuspended in PNK+ buffer plus LDS sample buffer supplemented with 0.1M DTT and were split among 4 lanes of 3-8% Tris-Acetate SDS-PAGE gels (Invitrogen). Input and supernatant samples were run simultaneously for comparison. An aliquot of each sample was run on a separate gel used strictly for western blotting analysis to verify immuoprecipitaiton of UPF1 protein from input extracts and location of migrating UPF1 protein. Proteins and RNA were transferred to nitrocellulose membrane and exposed to film overnight to visualize RNA species. Appropriately migrating UPF1-RNA complexes were identified and excised from nitrocellulose of both UPF1 CLIP and an equivalent band was excised from IgG CLIP lanes. Proteins were digested by proteinase K treatment, denatured with urea and phenol chloroform, precipitated, and resuspended in a small volume. 5' adapters were ligated at 16º C for 3-4 hours using /5AmMC6/GTT CAG AGT TCT ArCrA rGrUrC rCrGrA rCrGrA rUrCrN rN, where N represents any nucleotide and allows for assessment of PCR amplification bias in samples. Approximately 30% of each sample was not ligated to 5' linkers to enable comparison of the size of RNA species pre- post-ligation comparison by gel analysis. Precipitated RNA was run on 10% TBE-Urea gels and exposed to phosphoimager cassettes for ~3hrs to inspect sizes. Gel slices corresponding to varying sizes were excised (~80nt – 150nt). Gel was crushed and RNA was eluted overnight in elution buffer (300mM NaCl and 1mM EDTA), precipitated, resuspended, and reverse transcribed using: 1. 5’-CAAGCAGAAGACGGCATACGA-3’ (for non-multiplexed samples), or 2. 5’-GCCTTGGCACCCGAG AATTCCA-3’ (for multiplexing). Libraries were then amplified using 25 or 30 cycles of PCR using: 1. 5’-CAAGCAGAAGACGGCATAGCA-3’ and 5’-AATGATACGGCGACCACCGACAGGTTCAGAGTTCTACAGTCCGA-3’ (for non-multiplexed samples), or 2. 5’-AATGATACGGCGACCACCGAGATCTACACGTTCAGAGTTCTACAGTCCGA-3’

and, either 5’ CAAGCAGAAGACGGCATACGAGATCGTGATGTGACTGGAGTTCCTTGGCACCCGAGAATTCCA-3’, 5’-CAAGCAGAAGACGGCATACGAGATACATCGGTGACTGGAGTTCCTTGGCACCCGAGAATTCCA-3’, 5-CAAGCAGAAGACGGCATACGAGATGCCTAAGTGACTGGAGTTCCTTGGCACCCGAGAATTCCA-3’, or 5’-CAAGCAGAAGACGGCATACGAGATTGGTCAGTGACTGGAGTTCCTTGGCACCCGAGAATTCCA-3’. Respective CLIP samples were size selected on 10% TBE gels (BioRad) and eluted, precipitated, and resuspended. Quality of UPF1 CLIP samples was validated by BioAnalyzer and libraries were sequenced on GAIIX (1x36 nt) or HiSeq2000 (1x40 nt) machines.

**Ribosome footprinting.** Wildtype v6.5 cells and stable clones 2.6 (GFP shRNA) and 4.7 (Upf1-1 shRNA) were cultured and MEFs were removed as done for RNA-seq analysis. After removing MEFs, cells were washed quickly in PBS and snap frozen in liquid N2. Frozen cell pellets were directly lysed in lysis buffer (20mM HEPES pH7, 100mM KCl, 5mM MgCl2, 0.5% Na deoxycholate, 0.5% NP40, 1mM DTT, and protease inhibitors) on ice for 10 min.. Lysates were then treated with TURBO DNAse (10ul, Ambion) and RNaseI (2ul, NEB) treated at room temperature for 5 min. Lysates were then spun for 10 min, 17K RPM, at 4º C and the soluble fraction further RNase digested (~0.625 ul RNase/OD260 unit) at room temperature for 55 min. Ribosome associated RNA fragments were then isolated by ultra-centrifugation (Beckman Coulter, Ti70) through a sucrose cushion for 1hr and 50 min. at 60K RPM. Pelleted species were resuspended in 8M Guanidinium HCl and RNA was isolated by acid phenol extraction. RNAs were subsequently processed as described by ([Wang et al. 2012](#_ENREF_13))

**Analysis of UPF1 binding.** For region specific calling of UPF1 bound mRNAs, UPF1 binding within a given region was compared to the number of reads that would be expected to fall within this region by chance given its expression level, mappability, and length as estimated by RNA-seq read coverage. To call mRNAs as bound via either 3' UTR regions or CDS regions UPF1 CLIP reads and RNA-seq reads were mapped to these regions. Prior to mapping, UPF1 CLIP reads (IgG subtracted) were collapsed based on position and barcode. Barcodes which were likely (p >= 0.05) misreads of other highly amplified barcoded reads at the same position were predicted based on a Poisson model and removed. RNA-seq reads were filtered for those sequenced in the antisense direction of the transcript (in order to maintain even coverage throughout the ends of mRNAs) and for unique mapping within the genome (as was required for CLIP reads). For 3' UTR regions, a custom list of 3' UTR exons that lacked any sequence annotated as coding in any isoform was used. CLIP reads and RNA-seq reads (CHX+/-) were tallied per isoform that mapped within respective regions. A minimum expression threshold of 10 RNA-seq reads was required in a given region for an isoform to be considered for binding. A *P*-value for binding to a given region of a gene or isoform was calculated for each CLIP library using a Poisson distribution according to the following:

Pval = 1 - Poisson(Cn-1,lambda)

Lambda = Ct*Nx/Nt

Cn = number unique clip positions in region (CDS or 3' UTR) of gene/isoform x

Ct = total number unique clip positions in region (CDS or 3' UTR) in all genes

Nx = number unique RNA-seq reads in region (CDS or 3' UTR) of gene/isoform x

Nt = total number of RNA-seq reads in region (CDS or 3' UTR) in all genes

For CHX- libraries, genes were called as bound if at least one of the three libraries had a *P*-value < 0.001, a second library had a *P*-value < 0.05, and library Upf1.A2 (library of lowest coverage) was at least represented with 1 read. For CHX libraries, genes and isoforms were called as bound if both libraries had *P*-values <0.05. While CLIP binding was calculated on an isoform basis, binding was generally attributed to the entire gene (by utilizing binding *P*-values calculated for the bet isoform) for downstream analyses (all tables and figures except for Fig. S5A) since UPF1 binding information is difficult to attribute to specific isoforms. For UPF1 binding specificity analysis, reverse RNA-seq reads from CHX- cells (40nt) were mapped to 3' UTR exons and read coverage equivalent to that which mapped to 3' UTR exons for UPF1 CLIP-seq library Upf1.A1 was randomly sampled from the mapping reads. For simplicity reads spanning exon-exon junctions were omitted (in both RNA-seq and CLIP-seq samples) for this analysis. Genes were called as bound using a *P*-value threshold of 0.001 as described above.

**Gene expression analysis.** RNA-seq and ribosome footprint read mapping was performed using Tophat v.1.4.0 ([Trapnell et al. 2009](#_ENREF_10)) allowing 2 mismatches but disallowing splice site mismatches and novel introns (--solexa1.3-quals --splice-mismatches 0 --min-intron-length 10 --max-intron-length 1000000 --min-isoform-fraction 0.0 --no-novel-juncs). Expression levels (FPKMs, fragments per kilobase per million mapped) for each library were calculated using Cufflinks v.1.3.0 ([Trapnell et al. 2010](#_ENREF_11)), enabling compatible hits normalization and each pair of samples being compared were normalized against each other using a Loess-based normalization. RNA-seq FPKMs were calculated using annotations strictly from predicted protein coding genes. Ribosome footprint FPKMs were also calculated using Cufflinks with a custom annotation of only the protein coding sequence of these genes. For TE analysis, RNA-seq FPKMs were recalculated using the same annotations as for the footprints and then Loess normalized paired with footprint FPKMs from the same cell type. In general, all analyses considered only isoforms (or in the case of genes, genes with a primary isoform) with 5' UTR > 25 nt, CDS > 200 nt, and 3' UTR > 50 nt in order to avoid spurious annotations. Unless otherwise noted, a minimum expression threshold of 1 FPKM was required for all isoforms and genes (sum of expression levels of corresponding annotated isoforms). Since standard RNA-seq data reveals relative rather than absolute changes, we generally compared gene expression changes in one group of isoforms or genes of interest relative to another (e.g., isoforms with dEJs or long 3' UTRs to those without).

**GO analysis upon NMD inhibition.** Genes increasing in expression > 1.1x in each of the three NMD inhibition experiments (CHX treatment, Upf1-1, and Upf1-2) were compared to all expressed genes.

**Enrichment of tuORFs in transcriptional regulators.** David Gene Ontology ([Huang da et al. 2009](#_ENREF_4)) was used to determine numbers of genes belonging to the regulation of transcription (GO:0045449, regulation of transcription) gene ontology category. *P*-values were determined by comparing enrichments to those observed in all expressed genes (with particular length requirements for most annotated transcript). For bar graph, gene annotations for GO:0045449, were used to determine transcriptional regulators in all expressed mESC genes and in genes consistently up-regulated in NMD inhibition experiments. Gene groups were corrected for ability to detect tuORFs by filtering for genes that were expressed at levels above the 10th percentile of expression of all tuORF genes in Upf1-1 4.7 knockdown mESCs (cell line used to call tuORFs). Enrichment of tuORFs between each of these gene classes was then determined using the hypergeometric test.

**Analysis of 3' UTR length-related NMD in alternative control cell lines.** The 3' UTR length-associated difference in expression between the two control clones (GFP 2.4/GFP 2.6) was smaller in magnitude (±10%) than that seen in in any of the experimental treatments (CHX, Upf1-1, and Upf1-2), but reached statistical significance. Thus we confirmed the 3' UTR length results by comparing the magnitudes of changes resultant in these cases (given by median LFC long (1500-10k nt) isoforms – short (50-350 nt) isoforms) to 2 additional control cell lines generated using unrelated hairpins (stable knockdown of RBMXL2 – in v6.5 cells, generated in parallel with other clones used in this study). We did not find a significant expression change between genes with short 3' UTRs and genes with long 3' UTRs upon depletion of this factor nor when comparing either of these alternative control clones to GFP clone 2.4.

**Analysis of expression change following NMD inhibition of UPF1 bound genes.** To assess for the degree that 3' UTR length explains the de-repression of UPF1 bound genes following NMD inhibition, groups of genes that were of similar 3' UTR lengths and initial expression levels as those consistent genes that were bound by UPF1 (inclusive of the bound set) were subsampled, with replacement, and the degrees to which they increased expression in each NMD inhibition experiment were measured. The average cumulative distribution of expression changes for the subsampled populations is shown in Fig. 4F for Upf1-1 and results were similar for other NMD-inhibition treatments. To estimate the degree to which UPF1 binding increases de-repression over what would be expected for length alone, the differences between the median expression change of the bound genes and of the sampled populations was assessed (results ranged between 1.1- to 1.16-fold for the three experiments). The degree to which UPF1 3' UTR binding increases de-repression was also estimated in Fig. S4, wherein expression changes were assessed for genes that were bound and not bound by UPF1 with varying 3' UTR lengths.

**Analysis of RNA structure.** Clusters of UPF1 binding were identified as regions with coverage by at least 2 unique CLIP reads in a given library that did not overlap reads in any IgG CLIP library. UPF1 clusters from each of the three UPF1 CHX- CLIP libraries were combined and subsequently filtered to include those whose center was at least 300 nt from both the start and end of the 3' UTR. The free energy of folding was calculated for 50 nt windows every 5 nt within these region using the Vienna RNAfold package (v. 2.0.3b) ([Lorenz et al. 2011](#_ENREF_8)). The GC content and mononucleotide content were also calculated for these 50 nt windows. The resulting profiles were averaged over all UPF1 bound sites. G-rich regions may form various RNA structures including G quartets. However, genes with a generic G-quartet motif (G3-N1-7-G3-N1-7-G3- N1-7-G3) ([Burge et al. 2006](#_ENREF_2)) in their 3' UTR were not significantly de-repressed following UPF1 depletion (not shown).

**Analysis of A-/T-rich segments**. 3' UTRs were scanned for possession of an A- or T-rich segment within their first (TC-proximal) and their last 500 nt.  A- and T-rich segments were defined in two ways, 1. 95% identity in a 12 nt window - the approximate length of a minimal PABP binding site ([Deo et al. 1999](#_ENREF_3)), and 2. 70% identity in a 25 nt window - the approximate length of a PABP footprint ([Baer and Kornberg 1983](#_ENREF_1)).  The degree of de-repression of genes with these segments following NMD-inhibition was compared to those lacking such regions after controlling for A+T nucleotide content of the entire UTR.  Significance was measured by bootstrapping. In general, genes with A-rich segments proximal to the TC were less de-repressed than genes with A-rich segments at the end of the UTR using both segment definitions.  Similar correlations were seen only for T-rich segments and the 25 nt segment definition.

**Metagene plots**. For TC metagene plots, a set of TCs, each of which was the most 3’ annotated TC in the message, was derived to ensure that the apparent 3’ UTRs were in fact untranslated. This set of TCs was further filtered to exclude those that were less than 500 nt from the 5’ and 3’ ends of the transcript and those that were more than 50 nt

upstream of an exon-exon junction. CLIP read (IgG subtracted, but not collapsed) coverage was summed per position for 1000 nt around these TCs and normalized by the total number of reads mapping to this region per gene. For reads spanning exon-exon junctions, only the portions mapping to exons were included. The resulting densities were averaged within each library (each gene was weighted equally). Genes with total CLIP binding below a certain threshold were discarded. The resulting plots were smoothed using a discrete Gaussian with a standard deviation of 10 nt. UPF1 binding around AGO2 clusters was analyzed similarly. The AGO2 binding clusters as identified in the “WT1B_3UTR_norm_all_set” from ([Leung et al. 2011](#_ENREF_7)) were filtered to ensure that the center of each cluster was at least 400 nt from each TC of the gene. The UPF1 binding density was calculated for 800 nt surrounding the centers of the AGO2 clusters.

**Gene plots.** For each of the ribosome footprinting, RNA-seq and CLIP-seq libraries, gene plots were made by taking a representative isoform of each example gene (*Dmtf1*,
*Armc1* and *Esrrb*) and plotting the total coverage of each read type over the isoform on a linear scale. For reads spanning exon-exon junctions, only the portions mapping to exons were included. For paired-end RNA-seq reads, each read was included, but the inferable insert region between them was not. For the CLIP-seq plots, UPF1 CLIP reads (IgG subtracted) were not collapsed on position but were filtered for barcode amplification as described above. The plots were smoothed with a discrete Gaussian smoothing function with a standard deviation of 5 nt. Both the RNA-seq and ribosome footprinting data were generated from clone 4.7 (shRNA Upf1-1).

**Supplementary Figure Legends**

**Figure S1. Derivation of mESCs stably depleted of UPF1 and changes in gene expression associated with 3' UTR length and dEJ status upon NMD-inhibition, related to Fig. 1.** (A) Stable depletion of UPF1 protein from mESCs. Two clones from each of three lentiviral infections (*Upf1* shRNA-1, clones 4.4 and 4.7, *Upf1* shRNA-2, clones 5.2 and 5.7, or GFP shRNA, clones 2.4 and 2.6) were isolated. Equivalent levels of total protein were loaded for Western blot analysis (representative blot shown above). Quantitation was performed using ImageJ software. Mean and standard error of three technical replicate Western blots are shown (below). (B) Assessment of *Upf1* mRNA levels by real-time PCR in stable cell lines from (A) and biological replicates of wildtype v6.5 cells with and without 2 hours of treatment with cycloheximde (+CHX). *Upf1* mRNA levels were normalized to those of *Hprt* and ratios are plotted relative to levels in line 2.4 or untreated cells. (C) Alkaline phosphatase staining of mESC clones. mESCs were cultured on MEFs and then fixed and stained for alkaline phosphatase levels after removing puromycin from growth media for 48 hours. Hairpins and clone names are indicated for each panel. Magnification = 10X. (D) OCT4 levels in mESC clones. Cells were fixed and stained using anti-OCT4 antibody (left) or DAPI (middle) and images were overlayed (right). Hairpins used in generating clones are indicated to the left. OCT4 is selectively expressed in mESCs and not in underlying MEFs. Magnification = 4X. (E) Enrichment of overlap in mRNAs between NMD inhibition experiments over what would be expected by chance, assuming independence of each experiment, for increasing fold change requirements (x-axis). Overlap of mRNAs that increased in expression, blue bars. Overlap of mRNAs that decreased in expression, cyan line. (F) Genes with constitutive 3' UTRs and without 3' UTR exon-exon junctions are regulated by NMD in a length-dependent manner. Only consistently behaving genes that had one annotated 3' UTR without any junctions were considered. Ribosomal genes, which tend to be highly expressed and to have shorter 3' UTRs were also removed to ensure there were no confounding effects of this gene class in the analysis. mRNA expression was summed over all isoforms per gene and used to estimate abundance in each experiment. Left: CDFs of change in abundance following UPF1 depletion (Upf1-1) of genes with different length 3' UTRs. X-axis shown on Log2 scale. Middle: Median fold change in expression for each group of genes. Error bars represent standard error of the population or populations considered. Right: Ratio of median fold change of long (>1500nt) versus short (50-500nt) 3' UTRs for different NMD-inhibition experiments. Error bars as above. *P*-values displayed as in Fig. 1. (G) Well-expressed dEJ isoforms and isoforms with long 3’UTRs are significantly de-repressed following NMD inhibition. *P*-values (as determined by Wilcoxon ranksum test) and median log2 fold changes between dEJcons and non-dEJ isoforms or between mRNAs with longcons (>1500 nt) versus shortcons (50-500 nt) 3’UTRs are shown after requiring specific minimum expression levels for all isoforms considered (x-axis). In some cases, the fold changes observed appear to decrease from that observed at a lower threshold. This may indicate that most true NMD targets are lowly expressed, and those that are higher expressed have actually acquired features that protect them from NMD regulation. (H) Scatter plot of length of 3’UTR versus change in de-repression associated with dEJs following UPF1 depletion (Upf1-1/GFP). All mRNAs harboring a dEJ were matched with non-dEJ isoforms possessing 3’UTRs of similar lengths (±10%). Y-axis plots the difference in expression change between the dEJ isoform and the mean of the matched non-dEJ isoforms. Spearman correlation and *P*-value are given. Line represents least squares fit of the data.

**Figure S2. Correlation of ribosome footprint densities of uORFs calculated in UPF1- and control-depleted mESCs, related to Fig. 2.** (A) Density of ribosome footprints was determined in uORFs lying completely upstream of annotated translation start and Spearman correlation was determined after pseudo count of 0.0001 was applied to densities with value of 0. (B) As in (A) except that only uORFs that were called as “translated” or “untranslated” in either the UPF1-depleted or control cells are plotted and density values were normalized by the density of the surrounding background regions (for ntuORFs this is the higher of the footprint density in the flanking 60 nt or 1/60, for tuORFs this is the higher of the density in the flanking 60 nt or 2/3 – see Methods). Black lines indicate normalized densities of 1 and 5 which were used as thresholds for classifying ntuORFs and tuORFs, respectively. Inset at top right is expanded view of low density region. (C) Bar graph illustrates ratio in median abundance fold change between tuORF genesand genes without any annotated uORFs for the three NMD inhibition experiments. Y-axis shown on a Log2 scale. Error bar represents standard error of the two populations compared. Asterisks displayed as in Fig. 1.

**Figure S3. UPF1 CLIP read densities and specificity of UPF1 binding, related to Fig. 3.** (A) Isolation of UPF1 bound RNAs. UPF1-RNA complexes that migrated at 140-155 kDa (immediately above anti-UPF1 WB band and upper autoradiography band) were isolated from nitrocellulose. Nitrocellulose slices from 1:30 and 1:90K dilutions of RNaseA were combined. Nitrocellulose slices containing potential IgG complexes (treated with 1:90K RNaseA) were harvested in parallel from similar positions. * Indicates unknown RNA species migrating below UPF1 protein. (B) Locations of UPF1 CLIP reads. IgG subtracted, unique UPF1 sequences that mapped uniquely to the genome were further mapped to mRNA annotations. Order of calling to prevent duplicate calls: 1) CDS, 2) 3' UTR, 3) 5' UTR, 4) Intron, 5) Other. (C) UPF1 CLIP read densities. Density of reads per mature mRNA was calculated by summing coverage of reads mapping to 5’UTRs, CDS, and 3’UTRs and dividing by the summed total length of each region in the genome. Reads were counted as intronic if they mapped within a gene boundary but not within any exon and intergenic if they mapped outside of known gene boundaries. (D) *P*-values calculated for binding to 3' UTRs in each UPF1 CLIP library. Hashed grey line marks the number of genes that has a *P*-value of UPF1 binding in the 3' UTR < 0.001 (y-intercept is indicated as number of significant calls, listed at top). (E) Density of UPF1 binding peaks at known AGO2 binding clusters in 3' UTRs. UPF1 CLIP read density was combined from multiple UPF1 CLIP libraries and compared to the location of known AGO2 binding within 3' UTRs, as determined in ([Leung et al. 2011](#_ENREF_7)). Data was smoothed using a Gaussian with standard deviation of 10 nt. (F) Prediction of the free energy of RNA folding within the 600 nt surrounding sites of UPF1 binding. Free energy predictions were calculated using a 50 nucleotide sliding window over these regions and were averaged over all UPF1 binding sites ([Lorenz et al. 2011](#_ENREF_8)). Regions used in calculations were filtered to include only those that fall entirely within the annotated 3’UTR. This local change in free energy was not found to be significant when compared to that associated with regions of similar GC content nearby UPF1 binding sites. (G) Estimation of degree of saturation of 3' UTRs bound by UPF1 in Upf1.A1 CLIP library. The observed low degree of saturation may reflect transient nature of UPF1-RNA interactions. Upf1.A1 and RNA-seq reads were randomly sampled to reveal read coverage in 3’UTRs equivalent to that of 1x, 4/5x, 3/5x, 2/5x, and 1/5x the Upf1.A1 CLIP library. When mapping to 3' UTRs, uniqueness on positions was not enforced for RNA-seq reads (as it was for UPF1 CLIP samples, see Methods). This was reasoned to yield a more lenient estimate of the number of 3' UTRs that could be called bound by RNA-seq. Sampled reads were then used to call 3' UTRs bound with P-value < 0.001. (H) dEJ mRNAs with UPF1 binding near PTC. Examples of dEJ isoforms that displayed UPF1 binding in one or more UPF1 CLIP libraries (CHX-) are shown. Width of grey bar illustrates CDS and UTR regions. Vertical black bars indicate exon-exon junctions and red line marks site corresponding to TC of non-dEJ isoform for each respective gene. Note that for Tra2β, the dEJ isoform shown has an annotated cleavage site that is upstream of that which is annotated for the non dEJ isoform. Thus the position of the TC shown is very close to the end of the gene.

**Figure S4. UPF1 binding in CDS and 3' UTRs of varying lengths is associated with mRNA repression, related to Fig. 4.** (A) NMD regulation of genes bound by UPF1 in CDS. Left: Change in expression following UPF1 depletion (Upf1-1) for consistent genes with CDS bound by UPF1 (Boundcons, blue dots ), all genes with CDS bound by UPF1 (Bound, blue and cyan dots), and genes with CDS not bound by UPF1 (gray bars). Number of dots reflects number of genes falling within this bin of expression change. Right: Median fold change in mRNA abundance between consistent genes with UPF1 binding in CDS and unbound genes. *P*-values determined by Wilcoxon rank sum test and displayed as described in Fig. 1. (B) CDFs of gene expression changes between *Smg1* KO MEFs and wildtype MEFs ([McIlwain et al. 2010](#_ENREF_9)) for consistently behaving genes bound by UPF1 in the 3' UTR (blue), all genes bound by UPF1 in the 3' UTR (cyan), and unbound genes (black). (C) As in (B) except gene names were identified by homology to mouse genes either bound or unbound by UPF1 in their 3' UTR and mRNA abundance measurements were made in control- and UPF1-depleted U2OS cells ([Wang et al. 2011](#_ENREF_12)). (D) Change in expression of consistently behaving genes bound by UPF1 in the 3' UTR compared to all genes not bound following NMD inhibition, binned by 3’UTR length. Left: Median fold change in expression and standard error of genes not bound by UPF1 with different 3' UTR lengths (x-axis) following UPF1 depletion (Upf1-1). Error bars represent standard error of population. *P*-values indicate significance of changes in expression between groups of genes with differing 3' UTR lengths. Middle: As for left, except for consistent genes bound by UPF1 in their 3' UTR. Right: As in (A) between bound genes and unbound genes for different 3' UTR lengths.  *P*-values indicate significance of difference of expression changes between unbound and bound genes of indicated 3’UTR length by Wilcoxon rank sum test. In right column, range of differences in median % fold change in expression across different length 3' UTR bins. (E) UPF1 binding to shorter 3' UTRs is associated with mRNA de-repression. Only genes with annotated 3' UTRs less than 800 nt were considered. Left: As in (A) for consistent genes with 3’UTRs bound by UPF1 (Boundcons, blue dots ), all genes with 3' UTRs bound by UPF1 (Bound, blue and cyan dots), and genes not bound by UPF1 (gray bars). Number of dots reflects number of genes falling within this bin of expression change. Right: Ratio of fold change in mRNA abundance following NMD inhibition between consistent genes with UPF1 binding in 3' UTR and unbound genes. All axes relating to gene expression changes are plotted on a Log2 scale. *P*-values determined as in (A) and displayed as described in Fig. 1.

**Figure S5. NMD features that regulate isoform abundance, related to Fig. 6.** Predictive capacity of mRNA features to trigger isoform-specific NMD. Calculations were performed as in Fig. 6A except that feature assignment and expression analysis was done on an isoform level. *P*-values above individual bars represent significance of enrichment for de-repressed (>1.1-fold) isoforms within groups of isoforms with specific features (dEJ, red; 3’UTR>2000 nts, green; UPF1 3’UTR binding, blue) as compared to fraction of all isoforms that were de-repressed (All isoforms; medium gray), fraction of isoforms not harboring any of the NMD-triggering features (Isoforms without any feature; light gray), and fraction of isoforms that harbor at least one feature (Isoforms with any feature; dark gray). For this analysis, isoforms with any feature only considered dEJs, long 3’UTRs (>2000 nt), and UPF1 binding. *P*-values calculated using hypergeometric test.

**Supplementary Table Legends**

**Table S1. Summary of sequencing library read counts, related to Figs. 1-3.** For RNA-seq and ribosome footprint libraries, total number of read pairs or reads sequenced, mapped to the genome and junction database, and mapping strictly to non-ribosomal sequences are listed. For CLIP-seq libraries, total numbers of reads sequenced, total number of uniquely mapping positions before and after IgG library subtraction, and total number of unique mapped sequences that have been filtered for one-off highly amplified barcode sequences (see Methods) are listed.

**Table S2. Consistently behaving genes and isoforms, related to Figs. 1-2,4-6.** Table lists genes and isoforms that behave consistently between 3 NMD inhibition experiments. Consistently behaving genes or isoforms were defined as those that either increased consistently (> 1.1-fold increase in two or more experiments, and not decreased more than 1.1-fold in the third), decreased consistently (> 1.1-fold decrease in two or more experiments, and not increased more than 1.1-fold in the third), or were consistently unchanged (not changed more than 1.1-fold in either direction in all experiments). Fold change in gene/isoform expression for each experiment as well as the geometric mean of these values is listed.

**Table S3. Enrichment for transcriptional regulators in genes that are de-repressed following NMD-inhibition, related to Fig. 1-6.** Table lists gene name, expression change following UPF1 depletion or translational inhibition, whether the gene is consistently de-repressed, has an annotated uORF, is a tuORF gene, is an ntuORF gene, has an alternative uORF, or has an isoform with dEJ, ID of best isoform annotation, length of the 3' UTR (based on best annotation), whether the gene is bound by UPF1 in the 3' UTR, or belongs to GO:0045449 (transcriptional regulators), GO:0032502 (development), GO:0008380 (splicing), or is a transcriptional target of NANOG, SOX2, DAX1, NAC1, OCT4 (POU5F1), KLF4, ZFP281, REX1, or MYC (according to ([Kim et al. 2008](#_ENREF_5))).­­

**Table S4. Translational classification of uORFs, related to Fig. 2.** Table lists uORF name, genomic coordinates, ribosome footprint density in Upf1-1 cells, and translational classification. tuORF genes and ntuORF genes were determined from this information by identifying genes with at least one tuORF (tuORF genes) and genes with at least one ntuORF and no tuORFs (ntuORF genes).

**Table S5. UPF1 bound 3' UTRs and CDS, related to Fig. 4.** Table lists gene name, region lengths, *P*-value call for UPF1 binding in region (3' UTR or CDS) for each CLIP library, number of UPF1 CLIP tags (IgG subtracted) from each of five CLIP libraries mapping to this region, number of mapping RNA-seq reads from wildtype and CHX+ libraries, and λ calculation for each CLIP library based on total number of reads mapping to all genomic 3' UTRs or CDS regions in the library and the fraction of all RNA-seq reads mapping to all genomic 3' UTRs or CDS regions that map to this region of a given gene. For CLIP libraries only unique reads were considered, such that tags mapping to the same position and with the same barcode were assumed to be a product of PCR amplification and were collapsed. For RNA-seq libraries, all reads were considered.

**Supplementary References**

Baer BW, Kornberg RD. 1983. The protein responsible for the repeating structure of cytoplasmic poly(A)-ribonucleoprotein. *J Cell Biol* 96(3): 717-721.

Burge S, Parkinson GN, Hazel P, Todd AK, Neidle S. 2006. Quadruplex DNA: sequence, topology and structure. *Nucleic acids research* 34(19): 5402-5415.

Deo RC, Bonanno JB, Sonenberg N, Burley SK. 1999. Recognition of polyadenylate RNA by the poly(A)-binding protein. *Cell* 98(6): 835-845.

Huang da W, Sherman BT, Lempicki RA. 2009. Systematic and integrative analysis of large gene lists using DAVID bioinformatics resources. *Nature protocols* 4(1): 44-57.

Kim J, Chu J, Shen X, Wang J, Orkin SH. 2008. An extended transcriptional network for pluripotency of embryonic stem cells. *Cell* 132(6): 1049-1061.

Lau NC, Lim LP, Weinstein EG, Bartel DP. 2001. An abundant class of tiny RNAs with probable regulatory roles in Caenorhabditis elegans. *Science* 294(5543): 858-862.

Leung AK, Young AG, Bhutkar A, Zheng GX, Bosson AD, Nielsen CB, Sharp PA. 2011. Genome-wide identification of Ago2 binding sites from mouse embryonic stem cells with and without mature microRNAs. *Nat Struct Mol Biol* 18(2): 237-244.

Lorenz R, Bernhart SH, Honer Zu Siederdissen C, Tafer H, Flamm C, Stadler PF, Hofacker IL. 2011. ViennaRNA Package 2.0. *Algorithms for molecular biology : AMB* 6: 26.

McIlwain DR, Pan Q, Reilly PT, Elia AJ, McCracken S, Wakeham AC, Itie-Youten A, Blencowe BJ, Mak TW. 2010. Smg1 is required for embryogenesis and regulates diverse genes via alternative splicing coupled to nonsense-mediated mRNA decay. *Proceedings of the National Academy of Sciences of the United States of America* 107(27): 12186-12191.

Trapnell C, Pachter L, Salzberg SL. 2009. TopHat: discovering splice junctions with RNA-Seq. *Bioinformatics* 25(9): 1105-1111.

Trapnell C, Williams BA, Pertea G, Mortazavi A, Kwan G, van Baren MJ, Salzberg SL, Wold BJ, Pachter L. 2010. Transcript assembly and quantification by RNA-Seq reveals unannotated transcripts and isoform switching during cell differentiation. *Nature biotechnology* 28(5): 511-515.

Wang D, Zavadil J, Martin L, Parisi F, Friedman E, Levy D, Harding H, Ron D, Gardner LB. 2011. Inhibition of nonsense-mediated RNA decay by the tumor microenvironment promotes tumorigenesis. *Mol Cell Biol* 31(17): 3670-3680.

Wang ET, Cody NA, Jog S, Biancolella M, Wang TT, Treacy DJ, Luo S, Schroth GP, Housman DE, Reddy S et al. 2012. Transcriptome-wide Regulation of Pre-mRNA Splicing and mRNA Localization by Muscleblind Proteins. *Cell* 150(4): 710-724.
