# Supplementary material for: Global analyses of UPF1 binding and function reveal expanded scope of nonsense-mediated mRNA decay
Source: HighWire-hosted journal article supplement (doi:10.1101/gr.157354.113), 2013-06-13
Supplement: SuppTable_S1_v6.xlsx [file SuppTable_S1_v6.xlsx]

## Sheet: Sheet1
library	library preparation type	read pairs in library	mapped read pairs	non ribosomal mapped read pairs
2.4	mRNA	31384725	28990204	28282655
2.6	mRNA	29263430	27194085	26540842
5.2	mRNA	12266760	10845470	10703285
5.7	mRNA	16015371	14017365	13822793
4.4	mRNA	14401791	12552312	12336899
4.7	mRNA	31942899	28133971	27814154
v6.5 P22 NoCHX	mRNA	25848297	25368151	24978705
v6.5 P24 NoCHX	mRNA	24621608	24134471	23598712
v6.5 P22 CHX	mRNA	23021414	22574791	22268849
v6.5 P24 CHX	mRNA	22512229	22076886	21745179
library	library preparation type	reads in library	mapped reads	non ribosomal mapped reads
v6.5	Ribo	187276436	154750122	57214745
2.6 (GFP)	Ribo	186428404	160332371	47721198
4.7 (Upf1-1)	Ribo	186191742	171713558	65564814
CLIP
library	Ab	reads in fasta	unique positions	unique positions after subtraction	Total unique mapped sequences (barcode filtered ***)
Upf1.A1	Upf1	21964400	95935	95115	175664
Upf1.A2	Upf1	47015537	22688	19666	28848
Upf1.I	Upf1	20802379	98984	88339	116533
IgG.A1	IgG	82301482	9599	NA	NA
IgG.A2	IgG	2227561	8112	NA	NA
IgG.I	IgG	21420847	47066	NA	NA
Upf1.CHX.A1	Upf1	43755619	32852	30496	43905
Upf1.CHX.A2	Upf1	42566205	40046	33275	47564
IgG.CHX.A1	IgG	13354521	7080	NA	NA
IgG.CHX.A2	IgG	21310442	19251	NA	NA
*** barcode filter was applied to remove one-off barcodes of highly amplified fragments (see Methods)
