# Supplementary material for: Global analyses of UPF1 binding and function reveal expanded scope of nonsense-mediated mRNA decay
Source: HighWire-hosted journal article supplement (doi:10.1101/gr.157354.113), 2013-06-13
Supplement: SuppTable_S2_v5.xlsx [file SuppTable_S2_v5.xlsx]

## Sheet: Consistent genes
Consistently behaving genes (1.1-fold threshold)
Gene Name	Ensembl Gene	v6.5 CHX/v6.5	Upf1-1/GFP	Upf1-2/GFP	Geometric mean
Mtus2	ENSMUSG00000029651	1.43255	4.81791	4.50092	3.14357
Pnma5	ENSMUSG00000050424	2.20369	3.15752	3.30922	2.84494
Zfp600	ENSMUSG00000066007	1.96827	3.86393	2.28563	2.59044
BC043476	ENSMUSG00000061544	2.10146	3.43709	2.24794	2.53221
Txnip	ENSMUSG00000038393	6.23049	1.74918	1.45828	2.5142
Gm13138	ENSMUSG00000078499	1.74837	3.70854	2.18393	2.41931
Tbx3	ENSMUSG00000018604	1.73586	2.78737	2.88885	2.40886
5330429B09Rik	ENSMUSG00000071796	3.90129	2.01123	1.58903	2.31882
Slc30a2	ENSMUSG00000028836	2.35137	2.65513	1.924	2.29019
Arf2	ENSMUSG00000062421	2.07795	3.33932	1.62376	2.24184
AK134636	ENSMUSG00000087153	3.30839	1.99507	1.63144	2.20825
Bbs4	ENSMUSG00000025235	1.44947	3.03997	2.35817	2.18215
Gadd45b	ENSMUSG00000015312	4.07332	2.02717	1.20893	2.15318
Zfp534	ENSMUSG00000062518	2.20145	2.21858	1.96423	2.12484
Nfkbie	ENSMUSG00000023947	2.31165	1.97809	2.08161	2.11928
Armc7	ENSMUSG00000057219	3.13712	1.79409	1.66982	2.11032
n/a	AK050586	2.08843	2.40666	1.76704	2.07091
AK010804	ENSMUSG00000074832	1.606	2.66138	1.98981	2.04121
Zmat4	ENSMUSG00000037492	1.43947	2.16704	2.70263	2.03526
Eif4a2	ENSMUSG00000022884	2.68291	1.79583	1.67493	2.00581
Scn3a	ENSMUSG00000057182	1.68453	1.85904	2.54023	1.99624
Gm6900	ENSMUSG00000091026	0.944826	2.49873	3.29462	1.98134
Napb	ENSMUSG00000027438	3.5596	1.72248	1.24756	1.97033
AK006991	ENSMUSG00000069200	1.03816	2.35154	3.10479	1.96434
1810032O08Rik	ENSMUSG00000020812	7.23028	0.939037	1.10853	1.95973
AK142681	ENSMUSG00000090015	5.07901	1.26499	1.14587	1.94536
Gorab	ENSMUSG00000040124	2.95085	1.55568	1.60339	1.94522
Gm13139	ENSMUSG00000067916	1.84739	2.33285	1.67567	1.93291
BC029214	ENSMUSG00000047617	1.99098	2.07047	1.72878	1.92439
Ap4m1	ENSMUSG00000019518	2.35469	1.7229	1.73642	1.91697
2310046O06Rik	ENSMUSG00000032305	1.8373	2.2535	1.65522	1.89946
4933437F05Rik	ENSMUSG00000072919	1.56505	2.07212	2.11283	1.89934
Zfp819	ENSMUSG00000055102	4.06911	1.10486	1.49494	1.88717
AK042904	ENSMUSG00000008028	1.83002	2.18095	1.65631	1.87678
Zfp951	ENSMUSG00000072774	1.5351	1.85573	2.28974	1.86844
Zfp810	ENSMUSG00000066829	2.95058	1.62359	1.35694	1.8663
Rhbdd2	ENSMUSG00000039917	1.75773	2.03794	1.80286	1.86224
Taf1d	ENSMUSG00000031939	4.30373	1.08712	1.37992	1.86205
Arrdc2	ENSMUSG00000002910	1.4854	2.06869	2.08548	1.85744
BC096441	ENSMUSG00000018752	1.12181	1.80342	3.16513	1.85696
Nhlrc3	ENSMUSG00000042997	2.97971	1.63242	1.28744	1.84322
Mrm1	ENSMUSG00000018405	1.54531	1.98521	2.02162	1.83728
Rinl	ENSMUSG00000051735	1.12336	2.73644	1.99714	1.83107
Gm16515	ENSMUSG00000018931	1.3421	2.27423	1.9944	1.8259
n/a	ENSMUSG00000056300	1.62718	2.02161	1.83244	1.81993
Rasl11b	ENSMUSG00000049907	2.86211	1.33027	1.57964	1.81856
B230315N10Rik	ENSMUSG00000062931	2.13135	1.54864	1.81181	1.81512
Rlbp1	ENSMUSG00000039194	0.959899	2.60177	2.38574	1.81289
Atg12	ENSMUSG00000032905	1.48055	2.28447	1.70305	1.79258
Tex19.1	ENSMUSG00000039329	1.10404	3.05531	1.70478	1.79158
Oraov1	ENSMUSG00000031072	1.24847	2.67934	1.68617	1.78006
Cdkn2aip	ENSMUSG00000038069	2.01354	1.65447	1.68406	1.77688
n/a	BC049144	1.42111	1.70385	2.29614	1.77155
Tmem18	ENSMUSG00000043061	1.49916	2.15775	1.71311	1.76961
Exog	ENSMUSG00000042787	1.92356	1.6223	1.76202	1.76502
Slc15a4	ENSMUSG00000029416	4.32621	1.15827	1.082	1.75677
Tchp	ENSMUSG00000002486	1.91205	1.89942	1.49165	1.75629
Gm949	ENSMUSG00000073568	0.976173	3.27227	1.694	1.75562
2210409E12Rik	ENSMUSG00000057534	2.54424	1.66265	1.27838	1.75525
Ripply1	ENSMUSG00000072945	1.34102	2.11455	1.89066	1.75021
Kctd18	ENSMUSG00000054770	1.59621	1.93965	1.71379	1.74418
Zfp157	ENSMUSG00000036898	2.47481	1.56263	1.37131	1.74386
Ppp2r4	ENSMUSG00000039515	0.966628	1.10096	4.8743	1.73107
Pramel1	ENSMUSG00000041805	0.983082	2.16667	2.43168	1.7302
2610008E11Rik	ENSMUSG00000060301	3.54668	1.12876	1.28316	1.72544
4632415L05Rik	ENSMUSG00000048106	2.03412	1.94981	1.28864	1.72253
Kiaa1310	ENSMUSG00000010453	1.5411	2.02066	1.64107	1.72246
Dnmt3l	ENSMUSG00000000730	1.0774	2.4581	1.92571	1.7213
D9Ertd402e	ENSMUSG00000046603	2.029	1.55588	1.60261	1.7167
Zfp689	ENSMUSG00000048921	3.4211	1.29864	1.13248	1.71355
Gins3	ENSMUSG00000031669	1.96769	1.46803	1.72346	1.70752
2610305D13Rik	ENSMUSG00000066000	1.67935	1.85429	1.59807	1.70728
MtPolB	ENSMUSG00000020718	1.80514	1.71033	1.60956	1.70647
Ppm1k	ENSMUSG00000037826	1.86796	1.44016	1.84285	1.70512
Yod1	ENSMUSG00000046404	2.35542	1.37345	1.5215	1.70105
Morn1	ENSMUSG00000029049	1.34185	2.53383	1.42418	1.6918
Msc	ENSMUSG00000025930	1.82372	1.48056	1.77891	1.68725
4933436C20Rik	ENSMUSG00000031736	1.42505	1.32348	2.52021	1.68136
Zfp493	ENSMUSG00000090659	2.78199	1.12583	1.49456	1.67281
Itfg2	ENSMUSG00000001518	1.93174	1.54968	1.55026	1.66801
Accs	ENSMUSG00000040272	2.30673	1.51468	1.32291	1.66577
Slc37a4	ENSMUSG00000032114	1.661	1.89125	1.46581	1.66366
Lmbr2	ENSMUSG00000029130	1.53946	1.39061	2.14307	1.66164
Vhl	ENSMUSG00000033933	1.6343	1.78074	1.57003	1.65938
Zfp654	ENSMUSG00000047141	1.92137	1.29323	1.82902	1.65641
Gabbr1	ENSMUSG00000024462	1.6816	1.61322	1.65982	1.6513
Zfp708	ENSMUSG00000058883	2.36778	1.35287	1.40235	1.65
mKIAA1401	ENSMUSG00000038335	1.77987	1.64574	1.51992	1.64509
Ercc8	ENSMUSG00000021694	1.9854	1.57647	1.41773	1.64327
Fbxl12	ENSMUSG00000066892	2.33404	1.66599	1.14115	1.64327
n/a	ENSMUSG00000058050	0.985594	1.79595	2.50552	1.64297
St7l	ENSMUSG00000045576	2.825	1.27492	1.23122	1.64291
Irak3	ENSMUSG00000020227	1.61135	1.60653	1.71017	1.642
Zfp37	ENSMUSG00000028389	1.86218	1.71221	1.38836	1.64195
4930422G04Rik	ENSMUSG00000051278	3.06377	1.18948	1.21375	1.64153
Orc5	ENSMUSG00000029012	1.3364	1.83424	1.80303	1.64109
Zufsp	ENSMUSG00000039531	2.41743	1.35753	1.33365	1.63574
Fsd1l	ENSMUSG00000054752	2.07365	1.41181	1.48813	1.63324
Efcab2	ENSMUSG00000026495	1.60371	1.56038	1.74043	1.63307
BC048859	ENSMUSG00000016624	2.70762	1.36431	1.17458	1.63102
Urm1	ENSMUSG00000069020	1.38466	1.83615	1.70347	1.63003
Stx1a	ENSMUSG00000007207	2.10128	1.50747	1.36598	1.62952
Ccdc137	ENSMUSG00000049957	1.72053	1.95049	1.28413	1.62732
Zfp790	ENSMUSG00000011427	1.45938	1.76621	1.66698	1.62573
1700094D03Rik	ENSMUSG00000078667	1.76382	1.57889	1.53763	1.62388
Nudt13	ENSMUSG00000021809	1.7091	1.69943	1.47051	1.62248
Prkab2	ENSMUSG00000038205	1.82112	1.70507	1.37466	1.62215
Rapgef3	ENSMUSG00000022469	0.997933	1.8804	2.25885	1.61838
n/a	ENSMUSG00000078891	1.72567	1.67729	1.45448	1.6147
Dtl	ENSMUSG00000037474	2.39082	1.22967	1.41721	1.60913
Anks3	ENSMUSG00000022515	1.68261	2.04983	1.20574	1.60812
B3gntl1	ENSMUSG00000046605	1.51763	1.84149	1.48177	1.60585
Zdhhc17	ENSMUSG00000035798	2.94878	1.06606	1.31634	1.60545
Zfp167	ENSMUSG00000063488	1.37555	2.43953	1.23283	1.60532
Zc3h8	ENSMUSG00000027387	1.21215	1.67103	2.02897	1.60179
Ccdc46	ENSMUSG00000020728	1.12394	1.85861	1.96586	1.60138
Mettl14	ENSMUSG00000028114	1.33388	1.57161	1.93933	1.59602
1700061G19Rik	ENSMUSG00000024209	1.02142	2.09239	1.90022	1.59545
Cirbp	ENSMUSG00000045193	2.29902	1.67459	1.05268	1.59435
Efha2	ENSMUSG00000039478	2.47188	1.14728	1.42254	1.59192
Vps37b	ENSMUSG00000066278	2.08682	1.54179	1.25312	1.5916
Pde8a	ENSMUSG00000025584	1.24771	1.4181	2.27838	1.59153
Mzf31	ENSMUSG00000068134	1.39409	1.37401	2.0983	1.58994
Atg14	ENSMUSG00000037526	1.35775	1.50909	1.95738	1.5888
Hsdl1	ENSMUSG00000034189	1.08142	1.70181	2.17527	1.58784
Cenpo	ENSMUSG00000020652	1.33937	1.69859	1.75921	1.5877
Dgke	ENSMUSG00000000276	2.00037	1.2742	1.56307	1.58529
Gpcpd1	ENSMUSG00000027346	2.25734	1.37385	1.27791	1.58251
Pmm2	ENSMUSG00000022711	1.30351	1.99028	1.52736	1.58243
4930519F16Rik	ENSMUSG00000031325	1.36202	1.97468	1.47097	1.5816
Atf4	ENSMUSG00000042406	1.75507	1.82649	1.23354	1.58133
Sirt3	ENSMUSG00000025486	1.34975	2.04176	1.43189	1.58024
Zfp820	ENSMUSG00000069743	1.47767	1.50882	1.75524	1.57586
5730590G19Rik	ENSMUSG00000046591	2.34037	1.29771	1.28669	1.57512
Ddhd2	ENSMUSG00000061313	1.37121	1.66727	1.70919	1.57507
Smg7	ENSMUSG00000042772	1.68939	1.70792	1.35277	1.57449
Fam169b	ENSMUSG00000074071	1.45185	1.49177	1.77578	1.56677
Clk4	ENSMUSG00000020385	2.79188	1.20162	1.1445	1.56588
Sirt1	ENSMUSG00000020063	1.56066	1.4001	1.74037	1.56088
Uck1	ENSMUSG00000002550	1.56043	1.82842	1.32877	1.55928
Prl8a1	ENSMUSG00000019756	1.10904	2.14779	1.58341	1.5566
Sh2d4b	ENSMUSG00000037833	1.26787	2.76069	1.07362	1.5547
BC071190	ENSMUSG00000078902	1.24379	1.54824	1.94552	1.55312
Jmjd5	ENSMUSG00000030752	1.46375	1.49386	1.71033	1.55222
Tuft1	ENSMUSG00000005968	2.19979	1.35498	1.24469	1.54807
Slmo1	ENSMUSG00000024530	1.49521	1.89348	1.30491	1.5459
Zfp869	ENSMUSG00000054648	2.058	1.14447	1.56512	1.54478
Kcnn1	ENSMUSG00000002908	1.34392	1.64507	1.6653	1.54413
Pspc1	ENSMUSG00000021938	2.43402	1.22981	1.22654	1.5427
Spopl	ENSMUSG00000026771	1.873	1.55399	1.25935	1.54186
Tubg2	ENSMUSG00000045007	1.21665	1.72576	1.74391	1.54131
Ccdc111	ENSMUSG00000038225	1.53278	1.44839	1.64928	1.5413
Snx5	ENSMUSG00000027423	1.46507	1.52495	1.63707	1.54073
Zfp781	ENSMUSG00000062540	1.83414	1.131	1.76031	1.53991
Arrdc4	ENSMUSG00000042659	3.27386	0.960645	1.16031	1.53957
C030048B08Rik	ENSMUSG00000040302	1.79291	1.28707	1.56997	1.53586
Klhdc8b	ENSMUSG00000032609	1.56831	1.7279	1.33512	1.53517
n/a	ENSMUSG00000073387	1.50718	1.74401	1.37342	1.53405
Zfp27	ENSMUSG00000062040	2.36087	1.23405	1.23862	1.53384
Ttf1	ENSMUSG00000026803	1.76662	1.42077	1.43649	1.53341
Sec14l2	ENSMUSG00000003585	1.25309	2.10207	1.36693	1.53271
Calcoco2	ENSMUSG00000006056	1.01817	2.05764	1.71617	1.53197
Trub2	ENSMUSG00000039826	1.39628	1.80317	1.42774	1.53186
Bet1l	ENSMUSG00000025484	2.18119	1.37479	1.19677	1.53102
Hel308	ENSMUSG00000035266	2.17379	1.21014	1.36135	1.52994
Casp2	ENSMUSG00000029863	2.25828	1.27307	1.24418	1.52934
Lrrc2	ENSMUSG00000032495	1.03039	1.83866	1.88141	1.52755
Upf2	ENSMUSG00000043241	1.3115	1.51583	1.78645	1.5257
Pex26	ENSMUSG00000067825	1.09182	1.61816	2.00779	1.52509
Cdk20	ENSMUSG00000021483	1.73421	1.4864	1.36965	1.5227
Luc7l	ENSMUSG00000024188	1.68315	1.49531	1.39883	1.52127
Mtmr12	ENSMUSG00000039458	1.26705	1.74599	1.58912	1.52054
Nudt12	ENSMUSG00000024228	1.12682	1.22962	2.53004	1.51909
Zfp948	ENSMUSG00000067931	2.62821	1.00713	1.32401	1.51896
Prr3	ENSMUSG00000038500	2.28301	1.36514	1.12409	1.51878
Prex2	ENSMUSG00000048960	1.19452	1.60873	1.81049	1.51527
Gprc5a	ENSMUSG00000046733	1.55632	1.45517	1.53571	1.5151
Ikzf5	ENSMUSG00000040167	2.34091	1.12477	1.32049	1.51493
3110001I22Rik	ENSMUSG00000079737	1.7386	1.305	1.53116	1.51453
n/a	AK153849	1.89176	1.24772	1.47006	1.51393
Zfp418	ENSMUSG00000034538	1.3641	1.44293	1.75822	1.51259
n/a	ENSMUSG00000037581	1.55339	1.27462	1.74347	1.51133
Pgam5	ENSMUSG00000029500	1.3458	1.67664	1.5255	1.50988
Zfp59	ENSMUSG00000078779	1.60656	1.4838	1.44158	1.50905
Zfp35	ENSMUSG00000063281	1.68924	1.48081	1.37314	1.50881
n/a	AK049668	1.97416	1.17643	1.47769	1.50838
Lrriq4	ENSMUSG00000027703	1.86188	1.11631	1.64232	1.50568
Zfp772	ENSMUSG00000066838	1.35661	1.36894	1.83668	1.5053
Zfp85-rs1	ENSMUSG00000058331	1.49329	1.51345	1.49959	1.50209
Vegfc	ENSMUSG00000031520	2.44834	1.28961	1.07054	1.50076
Brp16	ENSMUSG00000022554	1.77494	1.4768	1.28659	1.49962
Zfand2a	ENSMUSG00000053581	1.79513	1.28757	1.45804	1.49927
Mcl1	ENSMUSG00000038612	1.45239	1.52511	1.51909	1.4985
Pbx4	ENSMUSG00000031860	1.19891	1.48908	1.88476	1.49849
Smg5	ENSMUSG00000001415	1.50994	1.61582	1.37891	1.49841
BC100492	ENSMUSG00000046774	0.910923	1.51125	2.43903	1.49743
Zfp607	ENSMUSG00000020420	1.69002	1.28966	1.5374	1.49641
Adap1	ENSMUSG00000056413	0.916939	1.98181	1.84319	1.4962
Flrt3	ENSMUSG00000051379	2.05414	1.05929	1.53917	1.49616
n/a	ENSMUSG00000071372	1.11777	1.59151	1.87548	1.49426
APMAP	ENSMUSG00000033096	1.91128	1.37196	1.26984	1.49327
Wsb1	ENSMUSG00000017677	1.80844	1.51453	1.21541	1.49314
Ccdc117	ENSMUSG00000020482	1.03959	1.54363	2.06968	1.492
Lrig2	ENSMUSG00000032913	2.42822	1.21116	1.12228	1.48889
Gpr160	ENSMUSG00000037661	2.37372	1.11461	1.24676	1.4886
Id4	ENSMUSG00000021379	1.91979	1.23321	1.39168	1.48802
Zfp273	ENSMUSG00000030446	2.38359	1.05918	1.30306	1.48727
Mtrf1l	ENSMUSG00000019774	2.40583	1.14769	1.1854	1.48474
mKIAA1376	ENSMUSG00000074794	2.98845	1.1564	0.943237	1.48272
Rad52	ENSMUSG00000030166	2.30597	1.24025	1.13681	1.48144
Fam33a	ENSMUSG00000020492	1.64295	1.60555	1.23098	1.48081
Caper	ENSMUSG00000027620	1.65833	1.45841	1.33497	1.478
Ankrd45	ENSMUSG00000044835	0.970717	2.75827	1.20518	1.47773
Cdca5	ENSMUSG00000024791	1.69778	1.38853	1.36853	1.47762
Zfp58	ENSMUSG00000071291	1.51032	1.21839	1.7477	1.47607
Prr14	ENSMUSG00000030822	1.73291	1.31519	1.41058	1.47589
Rad51ap1	ENSMUSG00000030346	1.82653	1.3339	1.31831	1.47544
Zfp498	ENSMUSG00000070420	2.60564	1.15374	1.06681	1.4747
Triml2	ENSMUSG00000091490	1.76138	1.43768	1.26624	1.47461
Stil	ENSMUSG00000028718	1.86262	1.20734	1.42333	1.47374
Capsl	ENSMUSG00000039676	1.00082	1.62217	1.97012	1.47338
Kdm6a	ENSMUSG00000037369	1.82551	1.2647	1.3767	1.47029
Mis12	ENSMUSG00000040599	2.39424	1.17705	1.12542	1.46924
Zfp719	ENSMUSG00000030469	2.50538	1.17915	1.06927	1.46727
Aste1	ENSMUSG00000032567	2.43124	1.0462	1.24156	1.46714
Rnf166	ENSMUSG00000014470	1.28206	1.67037	1.47337	1.46671
Polh	ENSMUSG00000023953	1.52937	1.2984	1.58538	1.46561
Armcx5	ENSMUSG00000072969	1.51534	1.23932	1.67531	1.46531
Mfsd8	ENSMUSG00000025759	1.36644	1.4645	1.57057	1.4648
Rsl1	ENSMUSG00000078994	2.41311	1.05462	1.23283	1.46395
Tsr2	ENSMUSG00000025264	1.29697	1.59225	1.51494	1.46255
Slc16a6	ENSMUSG00000041920	3.00928	0.930632	1.11681	1.46242
Mynn	ENSMUSG00000037730	1.767	1.256	1.40718	1.4617
Ccdc76	ENSMUSG00000033439	1.92385	1.19125	1.36263	1.46168
C030039L03Rik	ENSMUSG00000057093	1.81161	1.57388	1.09489	1.46151
Rbm18	ENSMUSG00000026889	1.3927	1.53333	1.46173	1.46146
Zfp119b	ENSMUSG00000062101	2.23021	0.932297	1.49926	1.46081
Zfp558	ENSMUSG00000074500	1.32372	1.89205	1.24398	1.46054
Ube2g2	ENSMUSG00000009293	1.56896	1.6344	1.21489	1.4605
Atl1	ENSMUSG00000021066	2.5409	1.18435	1.0342	1.46002
Cep55	ENSMUSG00000024989	1.59003	1.36354	1.43548	1.46002
Slc25a36	ENSMUSG00000032449	1.17916	1.42019	1.85818	1.45994
Mrpl9	ENSMUSG00000028140	1.27263	1.60764	1.51959	1.45951
Ccdc134	ENSMUSG00000068114	1.65727	1.40602	1.33124	1.45841
Tmem194b	ENSMUSG00000043015	1.40839	1.37103	1.6028	1.4573
Sepsecs	ENSMUSG00000029173	1.9017	1.26605	1.28288	1.45633
AU019823	ENSMUSG00000059820	2.07336	1.36741	1.08767	1.45554
Kcnk5	ENSMUSG00000023243	2.1643	1.07117	1.32223	1.45265
Mtif3	ENSMUSG00000016510	1.5462	1.34563	1.47237	1.45234
Topors	ENSMUSG00000036822	2.08352	1.19366	1.23093	1.45201
Slc35f2	ENSMUSG00000042195	1.36366	1.49405	1.50224	1.4519
ZIPO-III	ENSMUSG00000063364	2.05254	1.36962	1.08673	1.45101
Idua	ENSMUSG00000033540	1.41565	1.62689	1.3251	1.45051
Tprkb	ENSMUSG00000054226	1.2691	1.66783	1.4318	1.44714
Poli	ENSMUSG00000038425	1.33684	1.54418	1.46642	1.44659
6720489N17Rik	ENSMUSG00000072066	1.15802	1.21403	2.15116	1.44612
Ddx3x	ENSMUSG00000069045	1.26785	1.7691	1.34749	1.44582
Mphosph9	ENSMUSG00000038126	1.62643	1.18598	1.56042	1.44384
Gm13157	ENSMUSG00000078495	1.45306	1.43118	1.44715	1.44377
Ypel5	ENSMUSG00000039770	1.62549	1.53319	1.20591	1.44311
Zfp367	ENSMUSG00000044934	1.50081	1.22393	1.63491	1.44275
AK011498	ENSMUSG00000091474	1.65197	1.17423	1.54631	1.44217
Plxdc1	ENSMUSG00000017417	1.22948	1.44398	1.68539	1.44099
Stoml1	ENSMUSG00000032333	1.36359	1.70967	1.27599	1.43818
2410131K14Rik	ENSMUSG00000032840	1.36001	1.50152	1.45561	1.43782
Csrnp3	ENSMUSG00000044647	1.78917	1.14703	1.44816	1.43774
Rg9mtd3	ENSMUSG00000035601	1.07959	1.67896	1.63861	1.43745
Palb2	ENSMUSG00000044702	1.62482	1.18648	1.53832	1.43671
1110038D17Rik	ENSMUSG00000033416	1.4385	1.53884	1.33851	1.43629
Arfgap2	ENSMUSG00000027255	1.72849	1.45518	1.17722	1.43598
Jam2	ENSMUSG00000053062	1.19971	1.5805	1.55956	1.43535
Whamm	ENSMUSG00000045795	1.9939	1.22336	1.21109	1.43487
D10Wsu102e	ENSMUSG00000020255	1.36776	1.43638	1.50337	1.43477
Trpc2	ENSMUSG00000070425	1.78581	1.37942	1.19649	1.43377
Zfp688	ENSMUSG00000045251	1.42102	1.67678	1.23689	1.43374
Slc17a9	ENSMUSG00000023393	1.03547	1.55834	1.82267	1.43274
Tollip	ENSMUSG00000025139	1.43114	1.47369	1.39206	1.43191
Mett11d1	ENSMUSG00000004561	2.25061	1.25309	1.03981	1.43135
Lace1	ENSMUSG00000038302	1.08151	1.51893	1.78414	1.43109
D630037F22Rik	ENSMUSG00000038122	1.1126	1.60213	1.64365	1.43092
Rnd3	ENSMUSG00000017144	1.91033	1.34711	1.13547	1.42964
AK033827	ENSMUSG00000021120	1.1363	1.56607	1.64147	1.42948
4933403G14Rik	ENSMUSG00000050930	1.66412	1.40206	1.25098	1.42911
Ccdc126	ENSMUSG00000050786	1.20682	1.29553	1.8659	1.42887
2410075B13Rik	ENSMUSG00000044095	1.52997	1.37921	1.38149	1.42852
D230025D16Rik	ENSMUSG00000031889	0.989507	1.68099	1.75135	1.42819
Clk1	ENSMUSG00000026034	2.26019	1.16837	1.10196	1.42768
Bcl7b	ENSMUSG00000029681	1.7701	1.47346	1.11516	1.42744
Med7	ENSMUSG00000020397	2.26072	1.15674	1.1117	1.42722
Zfp472	ENSMUSG00000053600	1.86397	1.0832	1.43927	1.42702
Gjc1	ENSMUSG00000034520	1.99402	1.16363	1.25172	1.42676
Txnl4b	ENSMUSG00000031723	1.31664	1.35715	1.62512	1.42668
Slc25a38	ENSMUSG00000032519	1.32282	1.59164	1.37831	1.42637
AK008833	ENSMUSG00000078546	1.46077	1.29783	1.52905	1.42585
BC056163	ENSMUSG00000078896	1.28364	1.48029	1.52514	1.42571
Btbd19	ENSMUSG00000073771	1.47711	1.39555	1.40368	1.42498
Fnbp4	ENSMUSG00000008200	2.43205	1.01711	1.16922	1.42477
Snx13	ENSMUSG00000020590	1.47036	1.40614	1.39755	1.42432
Zfp715	ENSMUSG00000012640	1.93652	1.18451	1.25673	1.4232
AK046278	ENSMUSG00000006262	0.99393	1.74314	1.66166	1.42258
Pggt1b	ENSMUSG00000024477	1.49185	1.44955	1.33113	1.42252
A730069N07Rik	ENSMUSG00000031523	1.41734	1.20816	1.6726	1.42013
Nicn1	ENSMUSG00000032606	1.10986	1.74194	1.48106	1.42001
Ift46	ENSMUSG00000002031	1.26257	1.66289	1.36312	1.41977
Zbtb2	ENSMUSG00000075327	2.29927	1.02273	1.21392	1.41856
Usp49	ENSMUSG00000023984	1.04575	1.4296	1.90551	1.41759
Clcn7	ENSMUSG00000036636	1.6877	1.43907	1.16984	1.41634
Gm14435	ENSMUSG00000089951	1.39943	1.31212	1.54655	1.41611
n/a	ENSMUSG00000060149	1.66259	1.0532	1.62117	1.41593
Insig1	ENSMUSG00000045294	1.17634	1.66073	1.45074	1.41516
Gm7325	ENSMUSG00000079471	1.17835	1.57177	1.53022	1.41516
Hps5	ENSMUSG00000014418	1.6821	1.28571	1.30981	1.41493
8430406I07Rik	ENSMUSG00000027424	1.64322	1.28199	1.34157	1.41383
Aagab	ENSMUSG00000037257	1.19905	1.54923	1.52112	1.41375
n/a	ENSMUSG00000020631	1.67352	1.19344	1.41185	1.41278
Ensa	ENSMUSG00000038619	1.14535	1.66807	1.47215	1.41157
Mkrn1	ENSMUSG00000029922	0.941059	1.41171	2.1102	1.41003
Slc25a16	ENSMUSG00000071253	1.36872	1.34567	1.52107	1.40972
n/a	ENSMUSG00000071640	1.21096	1.33481	1.73259	1.40955
2610020H08Rik	ENSMUSG00000030924	1.67927	1.27583	1.30485	1.40872
Kctd2	ENSMUSG00000016940	1.17918	1.54327	1.53526	1.40843
Zbtb6	ENSMUSG00000066798	1.46246	1.30254	1.46566	1.40811
Spen	ENSMUSG00000040761	1.88105	1.24394	1.19249	1.40783
Fancm	ENSMUSG00000055884	1.49421	1.34735	1.38463	1.40737
Mgat5b	ENSMUSG00000043857	1.17016	1.52718	1.55449	1.40575
Usp11	ENSMUSG00000031066	1.13458	1.50086	1.63038	1.40547
Top3a	ENSMUSG00000002814	1.57761	1.40938	1.24822	1.40532
Zfp763	ENSMUSG00000067430	1.41427	1.15625	1.69376	1.40436
Gen1	ENSMUSG00000051235	1.58569	1.34559	1.29717	1.40403
AK029860	ENSMUSG00000040350	0.915067	1.71861	1.75974	1.40398
Polq	ENSMUSG00000034206	1.54733	1.29205	1.38315	1.4036
Klhl7	ENSMUSG00000028986	2.07368	1.13086	1.17875	1.40343
Dhdh	ENSMUSG00000011382	1.03222	1.6618	1.61031	1.40309
Zfp568	ENSMUSG00000074221	1.68321	1.31581	1.24608	1.40268
Fam13b	ENSMUSG00000036501	1.82634	1.33657	1.13035	1.40258
Zkscan14	ENSMUSG00000029627	2.37397	1.10721	1.04915	1.40232
Trim24	ENSMUSG00000029833	1.48438	1.43193	1.29687	1.40213
Zfp93	ENSMUSG00000055305	2.03157	1.16531	1.15987	1.40032
Ercc4	ENSMUSG00000022545	1.72964	1.16494	1.36225	1.40014
Jarid1a	ENSMUSG00000030180	1.73809	1.28785	1.22448	1.39947
Rsrc2	ENSMUSG00000029422	1.97845	1.14826	1.20614	1.39933
Supl15h	ENSMUSG00000018761	1.25478	1.49109	1.46064	1.3981
Dusp12	ENSMUSG00000026659	1.43048	1.38912	1.372	1.39698
D230037D09Rik	ENSMUSG00000046675	1.62066	1.534	1.09627	1.39683
Rps6ka5	ENSMUSG00000021180	1.55236	0.98701	1.77848	1.39676
0610030E20Rik	ENSMUSG00000058706	1.24632	1.43891	1.51936	1.39672
Tmem186	ENSMUSG00000043140	1.26581	1.412	1.52304	1.39628
Lyrm5	ENSMUSG00000040370	1.30826	1.65244	1.25791	1.3958
Msrb2	ENSMUSG00000023094	1.2991	1.53096	1.36671	1.3956
Chchd5	ENSMUSG00000037938	1.31484	1.49922	1.37787	1.39524
Zfp68	ENSMUSG00000058291	1.59461	1.36173	1.24859	1.3944
n/a	AK161843	1.876	1.15794	1.2475	1.39419
Setx	ENSMUSG00000043535	1.05248	1.67079	1.54062	1.39405
Snx11	ENSMUSG00000020876	1.43525	1.53795	1.22693	1.39389
AI848100	ENSMUSG00000040297	1.5711	1.37332	1.25482	1.39375
Cblc	ENSMUSG00000040525	1.06699	1.9375	1.30929	1.39362
Zfp160	ENSMUSG00000067942	1.61571	1.28052	1.30665	1.39306
A830080D01Rik	ENSMUSG00000044150	1.07958	1.7658	1.41778	1.39295
Dclre1c	ENSMUSG00000026648	1.43467	1.27182	1.48006	1.39258
6030446N20Rik	ENSMUSG00000049411	1.47541	1.15231	1.58776	1.39237
Tmem87a	ENSMUSG00000033808	1.46382	1.32659	1.38883	1.39195
Ddi2	ENSMUSG00000078515	1.11121	1.73742	1.39386	1.39093
Gtf2h1	ENSMUSG00000006599	1.44941	1.43354	1.29405	1.39054
Tdp2	ENSMUSG00000035958	1.23144	1.39203	1.56202	1.38862
Manba	ENSMUSG00000028164	1.24308	1.66239	1.29224	1.38737
Ormdl1	ENSMUSG00000026097	1.27894	1.47834	1.41111	1.38696
Ash2l	ENSMUSG00000031575	0.993092	1.68971	1.58982	1.38692
mKIAA0092	ENSMUSG00000031922	1.56419	1.2503	1.36349	1.38671
Gm12657	ENSMUSG00000063314	0.968329	1.67279	1.64298	1.38579
Rbpj	ENSMUSG00000039191	1.33608	1.42336	1.39681	1.38493
Tnni3	ENSMUSG00000035458	1.21537	1.41304	1.54594	1.38469
Nsun6	ENSMUSG00000026707	1.45855	1.27543	1.42641	1.38444
Atg10	ENSMUSG00000021619	1.20327	1.49862	1.47124	1.38435
Mbd1	ENSMUSG00000024561	1.29812	1.66078	1.22904	1.38377
Clcn6	ENSMUSG00000029016	2.12768	1.11356	1.11785	1.38357
Mppe1	ENSMUSG00000062526	1.80319	1.37578	1.06696	1.38329
n/a	BC063263	0.967624	1.55577	1.75673	1.38289
Naa40	ENSMUSG00000024764	1.09205	1.77917	1.36083	1.38279
Cdc25a	ENSMUSG00000032477	1.73132	1.189	1.28432	1.38275
Ubxn2a	ENSMUSG00000020634	1.26634	1.48301	1.40709	1.38252
AA987161	ENSMUSG00000058093	1.66637	1.11782	1.41769	1.38221
Nipal3	ENSMUSG00000028803	1.36627	1.18139	1.63594	1.38219
Sec22c	ENSMUSG00000061536	1.17062	1.41162	1.59253	1.38062
Zfp955a	ENSMUSG00000008686	1.76415	1.09977	1.35605	1.38051
Stk17b	ENSMUSG00000026094	1.47538	1.35572	1.31425	1.38012
Rft1	ENSMUSG00000052395	1.74751	1.23976	1.21039	1.37899
Tmem17	ENSMUSG00000049904	2.01064	1.06847	1.21877	1.37829
Ifrd1	ENSMUSG00000001627	1.58801	1.42934	1.15317	1.37814
Eml5	ENSMUSG00000051166	1.30561	1.26594	1.58293	1.37794
Rnf114	ENSMUSG00000006418	1.6493	1.297	1.22009	1.37682
Fam122b	ENSMUSG00000036022	1.44939	1.37783	1.30683	1.37678
Arih2	ENSMUSG00000064145	1.31684	1.45336	1.3617	1.37614
Cdc14a	ENSMUSG00000033502	1.11247	1.50787	1.55357	1.37614
Zfp788	ENSMUSG00000074165	1.75525	1.13993	1.30239	1.37611
Ahcyl2	ENSMUSG00000029772	1.36468	1.46919	1.29828	1.3756
BC083502	ENSMUSG00000079109	1.46528	1.36111	1.30408	1.37522
Cdkn2d	ENSMUSG00000079228	1.51079	1.3851	1.24257	1.3751
Yipf2	ENSMUSG00000032182	1.02758	1.51743	1.66715	1.37499
Ctdspl2	ENSMUSG00000033411	1.74988	1.27016	1.16947	1.37495
mTPK1	ENSMUSG00000029735	1.12071	1.35467	1.71186	1.37488
Slc9a5	ENSMUSG00000014786	1.08025	1.29778	1.85353	1.37481
Tmem126b	ENSMUSG00000030614	1.18934	1.51913	1.43604	1.37411
A930001N09Rik	ENSMUSG00000048249	1.2778	1.36298	1.48756	1.37344
Wdr37	ENSMUSG00000021147	1.40038	1.3644	1.35552	1.37329
Hemk1	ENSMUSG00000032579	1.20911	1.28586	1.66467	1.37298
BC005537	ENSMUSG00000019132	1.33179	1.55123	1.25123	1.37241
Alkbh8	ENSMUSG00000025899	1.49906	1.2414	1.3887	1.37229
Chmp1a	ENSMUSG00000000743	1.02174	1.60262	1.57775	1.37216
Dync1li2	ENSMUSG00000035770	1.12957	1.5369	1.48716	1.37184
Ybey	ENSMUSG00000033126	0.985004	1.38735	1.88924	1.37184
Pfkfb4	ENSMUSG00000025648	1.89216	1.25273	1.08784	1.37128
Atg16l2	ENSMUSG00000047767	1.3617	1.22571	1.54345	1.37084
Surf6	ENSMUSG00000036160	1.87704	1.19368	1.14693	1.36973
Ccdc36	ENSMUSG00000047220	0.947498	1.59465	1.69171	1.36728
Slc25a44	ENSMUSG00000050144	1.57407	1.31483	1.23461	1.36713
Gm5595	ENSMUSG00000069727	1.05751	1.41308	1.70899	1.36688
Unc119b	ENSMUSG00000046562	0.978251	1.65498	1.57361	1.36578
Tmem209	ENSMUSG00000029782	2.01234	1.09341	1.15761	1.36568
Stk38	ENSMUSG00000024006	1.18141	1.7444	1.23573	1.3656
Stk19	ENSMUSG00000061207	1.31466	1.60093	1.20879	1.36514
Tmc4	ENSMUSG00000019734	0.924195	1.78903	1.5377	1.36485
Apbb3	ENSMUSG00000001379	1.99639	1.09719	1.16002	1.36458
2210009G21Rik	ENSMUSG00000027281	1.50674	1.38332	1.21888	1.3645
Rsbn1l	ENSMUSG00000039968	1.63652	1.15914	1.33542	1.3632
Phkg2	ENSMUSG00000030815	1.52877	1.47306	1.12422	1.36292
Zfp280d	ENSMUSG00000038535	1.91223	1.11534	1.18501	1.36214
Lrrc40	ENSMUSG00000063052	1.17388	1.46296	1.4709	1.3619
n/a	BC064812	1.61862	1.07213	1.45442	1.36153
Gtf3c4	ENSMUSG00000035666	1.2404	1.57179	1.29449	1.3615
Arid5a	ENSMUSG00000037447	1.83636	1.26803	1.08309	1.36119
Mll5	ENSMUSG00000029004	2.08826	1.26302	0.955927	1.36105
Mlf1ip	ENSMUSG00000031629	1.10095	1.29053	1.77365	1.36082
G3bp2	ENSMUSG00000029405	1.07518	1.63277	1.43471	1.36058
Cecr5	ENSMUSG00000058979	1.08841	1.46818	1.57537	1.36035
Ric3	ENSMUSG00000048330	1.46798	1.28297	1.33404	1.35947
Dcp1a	ENSMUSG00000021962	1.61505	1.14274	1.36091	1.35932
Ccnl2	ENSMUSG00000029068	1.57774	1.23873	1.28353	1.35875
Naa16	ENSMUSG00000022020	2.3883	0.916971	1.14397	1.35817
AK161769	ENSMUSG00000073403	1.6055	1.43892	1.08407	1.35801
Bloc1s2	ENSMUSG00000057506	1.01136	1.51483	1.63315	1.35758
Dzip3	ENSMUSG00000064061	1.21641	1.63345	1.25913	1.35754
Rab30	ENSMUSG00000030643	2.17622	1.22528	0.937108	1.35699
Trps1	ENSMUSG00000038679	1.59958	1.26741	1.23232	1.3569
Ccdc25	ENSMUSG00000022035	1.07261	1.47299	1.58041	1.35666
AK043973	ENSMUSG00000054737	1.54548	1.1753	1.3742	1.3565
Zfp873	ENSMUSG00000061371	1.61199	1.03829	1.4908	1.35633
Stat2	ENSMUSG00000040033	0.9959	2.13521	1.17263	1.35604
Arl16	ENSMUSG00000057594	1.03129	1.94756	1.24086	1.35581
Parp6	ENSMUSG00000025237	1.52469	1.29967	1.257	1.35555
Srsf10	ENSMUSG00000028676	1.47849	1.316	1.27945	1.35529
Tmem144	ENSMUSG00000027956	1.36251	1.62511	1.12418	1.35525
Wbscr16	ENSMUSG00000061979	1.39112	1.29474	1.38132	1.35502
Pip4k2c	ENSMUSG00000025417	1.17918	1.58805	1.32725	1.35456
Mms22l	ENSMUSG00000045751	1.6062	1.12793	1.36957	1.3538
Fanci	ENSMUSG00000039187	1.02677	1.54445	1.56266	1.35323
mKIAA1609	ENSMUSG00000034105	0.943066	1.62695	1.61389	1.35289
5730455P16Rik	ENSMUSG00000057181	1.43032	1.37271	1.26073	1.35273
5830418K08Rik	ENSMUSG00000046111	1.87797	1.03719	1.26914	1.35213
Fam54a	ENSMUSG00000019992	1.67899	1.19008	1.23699	1.35206
Ttc17	ENSMUSG00000027194	1.91443	1.13921	1.13328	1.35205
Oas2	ENSMUSG00000032690	1.58474	1.37349	1.13429	1.35156
EG630579	ENSMUSG00000074867	1.08394	1.41243	1.61191	1.35136
2400003C14Rik	ENSMUSG00000031729	1.2402	1.29159	1.53506	1.34973
Ryr1	ENSMUSG00000030592	1.32293	1.24855	1.48807	1.34955
Pnrc2	ENSMUSG00000028675	1.6774	1.31348	1.11501	1.34931
Gm14308	ENSMUSG00000078890	1.08918	1.32344	1.703	1.34898
Tmem222	ENSMUSG00000028857	1.43587	1.48501	1.14998	1.34848
Mfsd11	ENSMUSG00000020818	1.52926	1.2787	1.25393	1.34847
Mett5d1	ENSMUSG00000057234	1.35539	1.35815	1.33076	1.34804
Epb4.1l5	ENSMUSG00000026383	1.75367	1.14411	1.22034	1.34782
Accsl	ENSMUSG00000075023	1.23795	1.89208	1.04504	1.34769
Slc25a20	ENSMUSG00000032602	0.966669	1.59544	1.5865	1.34751
Prosc	ENSMUSG00000031485	1.3285	1.28048	1.4383	1.3475
Atp6v0e2	ENSMUSG00000039347	1.13838	1.3299	1.61553	1.34733
Tctn1	ENSMUSG00000038593	1.19711	1.51574	1.34737	1.34715
2210408I21Rik	ENSMUSG00000071252	1.58537	1.18961	1.29491	1.34666
C430048L16Rik	ENSMUSG00000052137	1.54545	1.10823	1.42581	1.34663
Anapc16	ENSMUSG00000020107	1.12844	1.70872	1.26607	1.34649
Dcbld1	ENSMUSG00000019891	1.19561	1.17246	1.74144	1.34648
1810026J23Rik	ENSMUSG00000048429	1.50971	1.38643	1.16627	1.34647
Gm14139	ENSMUSG00000079009	1.32689	1.32576	1.38765	1.34646
Nadsyn1	ENSMUSG00000031090	1.76218	1.23235	1.12319	1.3461
Zfp60	ENSMUSG00000037640	1.78406	1.11156	1.22882	1.34568
Plk3	ENSMUSG00000028680	1.4392	1.41832	1.19129	1.34474
AK051514	ENSMUSG00000036779	1.17262	1.1621	1.78218	1.34416
1700029G01Rik	ENSMUSG00000073758	1.21816	1.4388	1.38491	1.34392
Rad9b	ENSMUSG00000038569	1.1303	1.76528	1.21645	1.3439
Cdkn2d	ENSMUSG00000066860	1.43858	1.39069	1.21267	1.3437
Zfp943	ENSMUSG00000053347	1.47338	1.21153	1.35863	1.34354
3830431G21Rik	ENSMUSG00000066438	1.11448	1.19413	1.8193	1.34279
A530054K11Rik	ENSMUSG00000021510	1.60041	1.08885	1.38876	1.34259
Tsc22d3	ENSMUSG00000031431	0.958774	2.0524	1.2288	1.34221
Trim39	ENSMUSG00000045409	1.75697	1.2848	1.07095	1.34211
Zfp780b	ENSMUSG00000063047	1.72936	1.06547	1.30816	1.3408
Fastkd3	ENSMUSG00000021532	1.65286	1.17403	1.24053	1.34021
Pex16	ENSMUSG00000027222	1.10629	1.44286	1.50776	1.34011
Hace1	ENSMUSG00000038822	1.16947	1.41895	1.4503	1.3401
Prpf39	ENSMUSG00000035597	1.70924	1.13164	1.24422	1.3401
Lrrc56	ENSMUSG00000038637	1.0208	1.81756	1.29646	1.33987
Camk2g	ENSMUSG00000021820	1.63744	1.35235	1.08569	1.33964
Ttc19	ENSMUSG00000042298	1.47463	1.16213	1.40017	1.33877
Smcr8	ENSMUSG00000049323	1.65968	1.28164	1.1271	1.3384
Zfp40	ENSMUSG00000002617	1.50217	1.165	1.36932	1.33819
Rbbp5	ENSMUSG00000026439	1.43031	1.28671	1.30127	1.33791
Zbtb26	ENSMUSG00000050714	1.53455	1.21747	1.28149	1.33778
1300018I17Rik	ENSMUSG00000001062	1.83134	1.1558	1.13089	1.3377
Als2cl	ENSMUSG00000044037	1.26115	1.44659	1.31195	1.33765
Pfkfb2	ENSMUSG00000026409	1.69006	1.31314	1.07674	1.33693
Crkl	ENSMUSG00000006134	1.67959	1.14574	1.24002	1.3363
BC027231	ENSMUSG00000036208	1.51195	1.16898	1.34528	1.33471
Crcp	ENSMUSG00000025532	1.27218	1.54853	1.20469	1.33387
Prmt6	ENSMUSG00000049300	1.63717	1.31864	1.09883	1.33367
Afap1l1	ENSMUSG00000033032	1.49622	1.2709	1.24748	1.33366
Scyl3	ENSMUSG00000026584	1.59739	1.28455	1.15355	1.3327
D19Ertd737e	ENSMUSG00000057858	1.19829	1.30372	1.51509	1.33269
Manbal	ENSMUSG00000063019	1.27645	1.4901	1.24337	1.33231
Akap2	ENSMUSG00000089945	1.65356	1.3862	1.03155	1.33223
Foxr2	ENSMUSG00000071665	2.1739	0.956461	1.13707	1.33219
Rdh13	ENSMUSG00000008435	1.63319	1.1324	1.27835	1.33218
Eif5	ENSMUSG00000021282	1.11192	1.54185	1.37841	1.33198
Man1b1	ENSMUSG00000036646	1.13494	1.50352	1.38363	1.33158
Brf2	ENSMUSG00000031487	1.48177	1.16844	1.36307	1.33138
Wdr32	ENSMUSG00000035572	1.72409	1.23888	1.10484	1.33137
B3gnt7	ENSMUSG00000079445	1.74968	1.33792	1.00708	1.33092
Ptp4a2	ENSMUSG00000028788	1.06231	1.5604	1.41902	1.32992
Necap2	ENSMUSG00000028923	1.4349	1.3956	1.17384	1.32963
Zfp46	ENSMUSG00000051351	1.18634	1.45923	1.3573	1.32944
Rbm33	ENSMUSG00000048271	1.61782	1.15777	1.25405	1.3293
Arid4a	ENSMUSG00000048118	1.99055	1.00958	1.16688	1.32856
Tnnt1	ENSMUSG00000064179	1.03238	1.64326	1.38111	1.32818
4922501C03Rik	ENSMUSG00000056919	1.70584	1.05253	1.30452	1.32803
NHE8	ENSMUSG00000039463	1.84042	1.19474	1.06497	1.32793
Tigd2	ENSMUSG00000049232	1.5515	1.3184	1.14479	1.32793
4921524J17Rik	ENSMUSG00000036934	1.60789	1.03394	1.40681	1.32738
Dhfr	ENSMUSG00000021707	1.16186	1.41967	1.41703	1.32711
Sycp1	ENSMUSG00000027855	1.15364	1.33384	1.51842	1.32696
Zfp947	ENSMUSG00000063383	1.69376	1.11852	1.23271	1.32674
Gxylt1	ENSMUSG00000036197	1.10543	1.56239	1.35044	1.32617
Chkb	ENSMUSG00000022617	1.17225	1.56549	1.27094	1.32616
Plekhm3	ENSMUSG00000051344	1.39075	1.41937	1.18091	1.32593
Mtmr7	ENSMUSG00000039431	0.940252	1.24755	1.98675	1.32581
D330028D13Rik	ENSMUSG00000047115	1.17439	1.12875	1.75683	1.3255
2210010C17Rik	ENSMUSG00000040498	1.00297	1.12087	2.07105	1.32539
Wdr76	ENSMUSG00000027242	1.61445	1.11456	1.29371	1.32532
Elmod2	ENSMUSG00000035151	0.999054	1.37973	1.68868	1.32529
Epha4	ENSMUSG00000026235	1.50304	0.921716	1.67976	1.32517
Zfp553	ENSMUSG00000045598	1.80696	1.39766	0.92132	1.32512
Zfp51	ENSMUSG00000023892	1.51509	1.05761	1.45099	1.32478
Rpa2	ENSMUSG00000028884	1.53541	1.25427	1.20679	1.32459
Fyttd1	ENSMUSG00000022800	1.03822	1.45912	1.53368	1.32446
2700050L05Rik	ENSMUSG00000039990	1.59416	1.08931	1.33647	1.32398
Snip1	ENSMUSG00000050213	1.50617	1.27486	1.20836	1.32387
Rbm12b	ENSMUSG00000046667	1.51574	1.16015	1.31921	1.32379
Gm1943	ENSMUSG00000039828	1.25233	1.4052	1.31815	1.32375
Pol mu	ENSMUSG00000020474	1.61213	1.25997	1.1419	1.32372
Snrnp48	ENSMUSG00000021431	1.67276	1.09968	1.26064	1.32362
Pla2g4b	ENSMUSG00000033852	1.39528	1.23698	1.34204	1.32311
1110034B05Rik	ENSMUSG00000048495	1.60294	1.16074	1.24347	1.3226
Acp6	ENSMUSG00000028093	1.06542	1.35717	1.59992	1.32257
Nxt2	ENSMUSG00000042271	1.17933	1.28541	1.52594	1.32253
Morc3	ENSMUSG00000039456	1.58933	1.18337	1.22874	1.3221
Med22	ENSMUSG00000015776	1.49088	1.61488	0.959633	1.322
Zfp184	ENSMUSG00000006720	1.51332	1.10122	1.38621	1.32194
Ap3m2	ENSMUSG00000031539	0.950133	1.87124	1.29611	1.32085
Azin1	ENSMUSG00000037458	1.37945	1.36122	1.2269	1.32073
Zfp398	ENSMUSG00000062519	2.15905	1.12883	0.945198	1.3207
Phospho2	ENSMUSG00000027088	1.47817	1.26146	1.23499	1.32055
Tmem229b	ENSMUSG00000046157	1.20408	1.21652	1.57101	1.32024
Efnb3	ENSMUSG00000003934	1.79013	1.06417	1.20348	1.3186
Slc10a7	ENSMUSG00000031684	1.45588	1.11919	1.40704	1.3186
Gm14296	ENSMUSG00000074527	1.27384	1.32064	1.35939	1.31749
Trip11	ENSMUSG00000021188	1.54812	1.09066	1.35334	1.31715
AK037090	ENSMUSG00000025147	1.40094	1.4146	1.15133	1.31649
Wdr91	ENSMUSG00000058486	0.999429	1.20505	1.89434	1.31645
Acox1	ENSMUSG00000020777	1.59806	1.21473	1.17497	1.31633
Abhd13	ENSMUSG00000040396	1.20291	1.14756	1.65127	1.31606
Zc3h7a	ENSMUSG00000037965	1.30697	1.39572	1.24809	1.31554
Zfp84	ENSMUSG00000046185	1.74916	1.19609	1.08808	1.31548
Pif1	ENSMUSG00000041064	1.20338	1.44947	1.30414	1.31516
Itpa	ENSMUSG00000074797	1.18454	1.50333	1.27688	1.31498
Dnahc8	ENSMUSG00000033826	1.13387	1.05102	1.90609	1.31454
Eaf1	ENSMUSG00000021890	1.3682	1.19747	1.38622	1.31446
Rpe	ENSMUSG00000026005	1.5403	1.14135	1.29088	1.31412
Bcl6	ENSMUSG00000022508	1.91192	1.21304	0.977299	1.31358
AK041465	ENSMUSG00000073664	1.24432	1.24943	1.45723	1.31338
Prdm2	ENSMUSG00000057637	1.4432	1.15955	1.35147	1.31263
Mecp2	ENSMUSG00000031393	1.48479	1.28384	1.18637	1.3126
Ddx31	ENSMUSG00000026806	1.99948	0.96502	1.17183	1.31252
Prr11	ENSMUSG00000020493	1.38169	1.2613	1.29699	1.31237
Rnf121	ENSMUSG00000070426	1.81759	1.13186	1.09811	1.31214
Piga	ENSMUSG00000031381	1.04414	1.30916	1.65157	1.31184
Ulk1	ENSMUSG00000029512	1.09575	1.54792	1.32698	1.31052
Tab3	ENSMUSG00000035476	1.3799	1.24433	1.3088	1.30984
Xpnpep3	ENSMUSG00000022401	1.40738	1.23852	1.28862	1.30962
Mad2l1bp	ENSMUSG00000034509	1.59123	1.17881	1.19698	1.30945
Stat3	ENSMUSG00000004040	1.70481	1.28981	1.02046	1.30918
Fam175a	ENSMUSG00000035234	1.51692	1.3629	1.08509	1.30908
AK217931	ENSMUSG00000032598	1.49521	1.28656	1.16559	1.30886
n/a	ENSMUSG00000091594	0.95641	1.43429	1.63392	1.30869
Zbtb43	ENSMUSG00000026788	1.30882	1.19844	1.42819	1.30846
Klhl18	ENSMUSG00000054792	1.64032	1.24067	1.09939	1.30791
St6galnac2	ENSMUSG00000057286	1.2699	1.22121	1.44187	1.30766
Atp1b2	ENSMUSG00000041329	1.13302	1.10522	1.78477	1.30745
Smg1	ENSMUSG00000030655	1.06971	1.53827	1.35819	1.30743
A730008H23Rik	ENSMUSG00000044783	1.42476	1.39868	1.11929	1.30657
Tiparp	ENSMUSG00000034640	1.29304	1.17902	1.46192	1.30623
Brix1	ENSMUSG00000022247	1.10392	1.27349	1.5851	1.30616
Rfesd	ENSMUSG00000043190	1.01591	1.7459	1.25426	1.30543
Zwilch	ENSMUSG00000032400	1.26214	1.42745	1.23469	1.30539
Znf276	ENSMUSG00000001065	1.91024	1.03108	1.12927	1.30535
Elac1	ENSMUSG00000036941	1.33741	1.22281	1.3591	1.30504
Gm14434	ENSMUSG00000078899	1.14385	1.24053	1.56605	1.30495
Klf4	ENSMUSG00000003032	1.19996	1.28235	1.44394	1.30489
4930503L19Rik	ENSMUSG00000044906	1.54773	1.12516	1.27462	1.30446
Zbtb24	ENSMUSG00000019826	1.87299	1.07699	1.10036	1.30445
Phtf1	ENSMUSG00000058388	1.26384	1.46617	1.19767	1.30438
Cdk8	ENSMUSG00000038481	0.992571	1.51651	1.47379	1.30421
Ankrd42	ENSMUSG00000041343	1.51396	1.52352	0.961265	1.30397
Rhbdd1	ENSMUSG00000026142	1.18952	1.59899	1.16511	1.30375
Lysmd3	ENSMUSG00000035840	1.8964	0.959005	1.21687	1.30316
AK005616	ENSMUSG00000028637	1.08548	1.44366	1.41198	1.30308
Pask	ENSMUSG00000026274	1.27685	1.33882	1.29381	1.3029
Cggbp1	ENSMUSG00000054604	1.56856	1.06017	1.3281	1.30227
Unk	ENSMUSG00000020770	1.99292	0.950062	1.16593	1.30208
BC024814	ENSMUSG00000039345	1.53334	1.20631	1.19271	1.3018
Tcfap2c	ENSMUSG00000028640	1.7221	1.13561	1.12658	1.30122
AK076954	ENSMUSG00000036054	1.85023	0.964906	1.23386	1.30114
Smek2	ENSMUSG00000020463	1.33705	1.23048	1.33773	1.30076
Wdr4	ENSMUSG00000024037	1.57884	1.12972	1.23181	1.30002
Zfp410	ENSMUSG00000042472	1.74256	1.19222	1.05667	1.29965
Cenpi	ENSMUSG00000031262	0.973241	1.31348	1.7159	1.29931
Ccnt2	ENSMUSG00000026349	1.64979	1.14135	1.16468	1.29923
Rab4a	ENSMUSG00000019478	1.12729	1.33178	1.45943	1.29882
Alkbh3	ENSMUSG00000040174	1.70788	1.32252	0.969991	1.2988
Gorasp1	ENSMUSG00000032513	1.22687	1.4433	1.23726	1.29879
mKIAA1418	ENSMUSG00000005899	1.14167	1.30645	1.46704	1.29825
Kif3b	ENSMUSG00000027475	1.17236	1.42177	1.31151	1.29784
AK013883	ENSMUSG00000022507	1.52166	1.23902	1.15932	1.29777
Map3k2	ENSMUSG00000024383	1.32393	1.20753	1.36694	1.29769
Tmem68	ENSMUSG00000028232	1.08302	1.30971	1.5378	1.2969
Enox1	ENSMUSG00000022012	1.20069	1.58908	1.14277	1.29672
Lca5	ENSMUSG00000032258	1.19548	1.22019	1.4944	1.29662
Ubn1	ENSMUSG00000039473	1.4146	1.27595	1.20718	1.29642
Fgfr1op	ENSMUSG00000069135	1.09533	1.46105	1.36126	1.29633
Arhgef4	ENSMUSG00000037509	1.75561	1.12712	1.09916	1.29565
Tgoln2	ENSMUSG00000056429	1.03604	1.49434	1.40357	1.29525
Pik3r3	ENSMUSG00000028698	1.29393	1.47319	1.1399	1.29522
Casp9	ENSMUSG00000028914	1.06929	1.49678	1.3576	1.29521
Fam48a	ENSMUSG00000027751	1.08929	1.36399	1.46196	1.29508
Usp53	ENSMUSG00000039701	1.54109	1.09537	1.28666	1.29504
BC056163	ENSMUSG00000078884	1.19174	1.23134	1.47888	1.29469
A230051G13Rik	ENSMUSG00000049287	1.47719	1.26347	1.16241	1.29455
Cyld	ENSMUSG00000036712	1.69527	1.24168	1.03034	1.29442
Dyrk1a	ENSMUSG00000022897	1.49926	1.28116	1.1284	1.29414
Otx2	ENSMUSG00000021848	1.86822	0.925452	1.25276	1.29385
Vps33a	ENSMUSG00000029434	1.07385	1.48193	1.35981	1.29345
1110032A03Rik	ENSMUSG00000037971	1.33735	1.50168	1.07751	1.29345
Triap1	ENSMUSG00000029535	1.24119	1.38101	1.26137	1.29308
Mettl2	ENSMUSG00000020691	1.3786	1.18682	1.32031	1.2927
Stam	ENSMUSG00000026718	1.79211	1.0358	1.16216	1.29212
Suv39h2	ENSMUSG00000026646	1.25439	1.29356	1.32916	1.29201
Fbxo30	ENSMUSG00000047648	1.45591	1.18781	1.24545	1.29142
Uty	ENSMUSG00000068457	1.42348	1.26877	1.19251	1.29141
Cdh24	ENSMUSG00000059674	1.26441	1.34909	1.26208	1.29124
Rcan1	ENSMUSG00000022951	1.57081	1.39112	0.984995	1.29114
Nanos1	ENSMUSG00000072437	0.919366	1.55668	1.50256	1.29074
Slc35b1	ENSMUSG00000020873	1.29379	1.29682	1.281	1.29052
Ska3	ENSMUSG00000021965	1.0872	1.38291	1.42848	1.29021
Eif2ak2	ENSMUSG00000024079	1.22232	1.6007	1.0955	1.28934
Pdrg1	ENSMUSG00000027472	0.997941	1.64892	1.30238	1.28928
1500010J02Rik	ENSMUSG00000020898	1.29914	1.24476	1.32422	1.28894
Tube1	ENSMUSG00000019845	1.28042	1.10663	1.51101	1.28886
Cdc6	ENSMUSG00000017499	1.90032	1.00404	1.1219	1.28878
Grinl1a	ENSMUSG00000032199	1.18751	1.45394	1.238	1.28816
Zscan29	ENSMUSG00000050619	1.43976	1.15766	1.2813	1.28778
Tmco4	ENSMUSG00000041143	1.30235	1.38606	1.18286	1.2877
AK203717	ENSMUSG00000045917	1.08535	1.23138	1.59715	1.28756
Cdca7	ENSMUSG00000055612	1.29191	1.15861	1.42358	1.28682
Fam119a	ENSMUSG00000025956	1.33444	1.32814	1.20188	1.28667
Smcr7l	ENSMUSG00000022412	1.33032	1.31043	1.2218	1.28664
Derl2	ENSMUSG00000018442	1.27378	1.25481	1.33188	1.28641
Tbc1d13	ENSMUSG00000039678	0.941079	1.7227	1.31225	1.28613
Setdb2	ENSMUSG00000071350	1.29974	1.22062	1.33998	1.28582
Prkcc	ENSMUSG00000078816	1.50026	1.06645	1.32487	1.28458
Mdp1	ENSMUSG00000002329	1.11267	1.5348	1.24095	1.28447
Zfp942	ENSMUSG00000071267	1.38785	1.16071	1.3151	1.28433
Dhx9	ENSMUSG00000042699	1.6505	1.16014	1.10623	1.28427
Zfp12	ENSMUSG00000029587	1.27858	1.15134	1.43833	1.28409
Leng1	ENSMUSG00000078813	1.71668	1.16319	1.05747	1.28293
Mbd4	ENSMUSG00000030322	1.29734	1.21729	1.33633	1.28269
Sec11a	ENSMUSG00000025724	1.14922	1.43271	1.27878	1.2817
Zfp263	ENSMUSG00000022529	1.4189	1.27877	1.15843	1.28097
Mtm1	ENSMUSG00000031337	0.943415	1.4604	1.52455	1.28067
Zfp212	ENSMUSG00000052763	1.58468	1.07335	1.23376	1.28028
Tmed8	ENSMUSG00000034111	1.08198	1.38647	1.39816	1.28005
Dpp4	ENSMUSG00000035000	0.946192	1.63377	1.3562	1.27987
Coq10a	ENSMUSG00000039914	1.13199	1.43139	1.29195	1.27923
Fam134c	ENSMUSG00000017802	1.50322	1.21786	1.14173	1.27858
Cyp4f13	ENSMUSG00000024055	1.20385	1.3513	1.2848	1.27856
Gmeb2	ENSMUSG00000038705	1.40831	1.23286	1.20342	1.27843
Tsc1	ENSMUSG00000026812	1.21701	1.29615	1.32309	1.27795
n/a	BC064714	1.44592	0.938774	1.53455	1.27711
Rnf25	ENSMUSG00000026171	1.70196	1.20549	1.01494	1.27698
Dnt2	ENSMUSG00000032615	1.58548	1.17735	1.11505	1.2768
Fam161a	ENSMUSG00000049811	1.56506	1.10111	1.20738	1.27664
2810408A11Rik	ENSMUSG00000018570	0.935842	1.46471	1.51739	1.27649
2310035C23Rik	ENSMUSG00000026319	1.53871	1.12378	1.20221	1.27626
4933407H18Rik	ENSMUSG00000037355	1.52392	1.21826	1.11886	1.27593
Ptp4a1	ENSMUSG00000026064	1.34772	1.25943	1.2227	1.27555
Atpaf2	ENSMUSG00000042709	1.2792	1.1437	1.41579	1.27473
Rnf168	ENSMUSG00000014074	1.50866	1.15347	1.18912	1.27431
Alg8	ENSMUSG00000035704	1.56816	1.30284	1.01214	1.27401
Rybp	ENSMUSG00000072872	1.32179	1.09348	1.42993	1.27379
n/a	ENSMUSG00000039282	1.83556	0.919365	1.22467	1.27377
Ccdc15	ENSMUSG00000034303	1.03226	1.54949	1.29135	1.27352
Zfp597	ENSMUSG00000039789	1.40043	1.15253	1.27954	1.27347
Tmem60	ENSMUSG00000045435	1.37028	1.17013	1.28801	1.27347
Ppap2a	ENSMUSG00000021759	1.80632	1.13158	1.00865	1.27274
Trmt11	ENSMUSG00000019792	1.48628	1.07099	1.29449	1.27251
Zbtb41	ENSMUSG00000033964	1.3853	1.19777	1.24154	1.27241
Smek1	ENSMUSG00000041846	1.72065	1.1327	1.05587	1.27195
BC032203	ENSMUSG00000036568	1.42099	1.19828	1.20823	1.27184
Ttc26	ENSMUSG00000056832	1.04929	1.34379	1.45867	1.27173
Trim23	ENSMUSG00000021712	1.2431	1.38311	1.19623	1.27172
Gpbp1	ENSMUSG00000032745	1.28299	1.30281	1.23001	1.27156
Crebl2	ENSMUSG00000032652	1.17498	1.40867	1.24184	1.27146
1700009P17Rik	ENSMUSG00000026649	0.96102	1.12283	1.90101	1.2706
Trim13	ENSMUSG00000035235	1.60657	1.01905	1.25288	1.27058
Prss16	ENSMUSG00000006179	1.30707	1.57379	0.996731	1.2704
AI314976	ENSMUSG00000040771	1.06844	1.55356	1.23431	1.27009
Ankrd10	ENSMUSG00000031508	1.4316	1.10433	1.29511	1.26982
Sbds	ENSMUSG00000025337	1.25239	1.24079	1.31583	1.26924
Ccrn4l	ENSMUSG00000023087	1.87987	0.963687	1.12789	1.26895
Dnajc27	ENSMUSG00000020657	1.71306	1.02741	1.16018	1.26867
Fbxl4	ENSMUSG00000040410	1.45774	1.23006	1.13748	1.26819
Haus6	ENSMUSG00000038047	1.36202	1.1628	1.28766	1.26813
Arhgap28	ENSMUSG00000024043	1.01189	1.38498	1.45397	1.26778
Acvr2a	ENSMUSG00000052155	1.757	1.02541	1.13016	1.26746
Nos1	ENSMUSG00000029361	0.951731	1.55436	1.37633	1.26745
Hcfc2	ENSMUSG00000020246	1.35076	1.18429	1.26883	1.26614
Dhrs13	ENSMUSG00000020834	1.54822	1.09382	1.19834	1.26606
mKIAA0732	ENSMUSG00000038290	1.46058	1.29612	1.07118	1.26574
Tdgf1	ENSMUSG00000032494	0.912596	1.48794	1.49259	1.26552
Lcmt2	ENSMUSG00000074890	1.60444	1.19796	1.05424	1.26542
Tmem87b	ENSMUSG00000014353	1.17506	1.22492	1.40688	1.26515
Zfp874b	ENSMUSG00000059839	1.0148	1.11923	1.78282	1.26513
Rcor3	ENSMUSG00000037395	1.60553	1.13324	1.11286	1.26511
Rad9	ENSMUSG00000024824	1.52374	1.12263	1.18298	1.26486
Iqcb1	ENSMUSG00000022837	1.20737	1.30725	1.28143	1.26463
Cyb5r1	ENSMUSG00000026456	1.48765	1.40065	0.970563	1.2646
Akap11	ENSMUSG00000022016	1.07802	1.4141	1.32558	1.26427
Stk31	ENSMUSG00000023403	0.998471	1.59868	1.26506	1.26397
Spata6	ENSMUSG00000034401	1.16937	1.53806	1.1206	1.26316
Ankrd54	ENSMUSG00000033055	1.53506	1.23811	1.0598	1.2629
Cntrob	ENSMUSG00000032782	1.2959	1.2867	1.20746	1.26272
Trim59	ENSMUSG00000034317	1.29208	1.12603	1.38323	1.26254
Usp30	ENSMUSG00000029592	1.55731	1.1804	1.09459	1.26246
Ncapg	ENSMUSG00000015880	0.918957	1.41612	1.54569	1.26233
Sft2d3	ENSMUSG00000044982	1.32482	1.19617	1.26863	1.2621
Ercc6	ENSMUSG00000054051	1.42907	0.979844	1.43528	1.26197
Myst2	ENSMUSG00000038909	1.50188	1.15269	1.16084	1.26195
Rprd1b	ENSMUSG00000027651	1.40782	1.20897	1.18024	1.26176
Ptpn4	ENSMUSG00000026384	1.2213	1.22065	1.34698	1.26161
Nol9	ENSMUSG00000028948	1.37567	1.17327	1.24319	1.26129
Ccdc157	ENSMUSG00000051427	1.11071	1.37375	1.3147	1.26118
Cbfa2t2	ENSMUSG00000038533	1.35507	1.26317	1.1717	1.26109
Slc23a2	ENSMUSG00000027340	1.39299	1.15283	1.24886	1.26108
Tle3	ENSMUSG00000032280	1.10499	1.42685	1.27141	1.26088
Ubr1	ENSMUSG00000027272	1.28436	1.1733	1.32939	1.26062
Blzf1	ENSMUSG00000026577	1.33175	1.20947	1.24288	1.26032
Usp24	ENSMUSG00000028514	1.25067	1.24248	1.2881	1.26026
Gga3	ENSMUSG00000020740	1.6671	1.05058	1.14257	1.26016
Zmynd8	ENSMUSG00000039671	1.76027	1.23832	0.91693	1.25965
Zfp82	ENSMUSG00000058447	1.00858	1.41801	1.39748	1.25963
Zdhhc24	ENSMUSG00000006463	1.09293	1.30274	1.40362	1.2596
mKIAA0998	ENSMUSG00000012609	1.48045	1.20554	1.11946	1.25949
Atxn7l1	ENSMUSG00000020564	0.920109	1.11715	1.94154	1.25902
Herc4	ENSMUSG00000020064	1.14292	1.24369	1.40281	1.25866
Ei24	ENSMUSG00000062762	0.931233	1.43051	1.49629	1.25851
Zfp354a	ENSMUSG00000020364	1.25373	1.03072	1.54245	1.2585
1810029B16Rik	ENSMUSG00000025591	1.20589	1.2419	1.32922	1.25795
Etv1	ENSMUSG00000004151	1.70228	1.04051	1.12309	1.25766
Hsd17b11	ENSMUSG00000029311	1.37976	1.22955	1.17233	1.25757
Chd9	ENSMUSG00000056608	1.57656	1.1725	1.07586	1.25755
Fitm2	ENSMUSG00000048486	1.24802	1.09928	1.44916	1.25743
Plekhf2	ENSMUSG00000049969	1.40398	1.25861	1.12501	1.25739
Mtpap	ENSMUSG00000024234	1.46943	1.11674	1.21104	1.25724
Zfp518a	ENSMUSG00000049164	1.54134	0.917378	1.40543	1.25724
Zzz3	ENSMUSG00000039068	1.44825	1.22093	1.12378	1.2572
Foxred1	ENSMUSG00000039048	1.38947	1.1834	1.20799	1.25704
Cacna1a	ENSMUSG00000034656	1.02961	1.34279	1.43578	1.25677
Erlec1	ENSMUSG00000020311	1.42243	1.32166	1.05549	1.25661
Zbed6	ENSMUSG00000026464	1.32121	1.19622	1.25475	1.25636
100043387	ENSMUSG00000078885	1.10003	1.20753	1.49236	1.2562
Kif15	ENSMUSG00000036768	1.434	1.12862	1.22394	1.25589
Dclre1b	ENSMUSG00000027845	1.61115	1.0506	1.16929	1.25554
Iqcc	ENSMUSG00000040795	1.02461	1.3783	1.40133	1.25549
Slc25a14	ENSMUSG00000031105	1.21707	1.19946	1.35518	1.25535
Rad51c	ENSMUSG00000007646	1.244	1.11123	1.43055	1.25519
Zfp101	ENSMUSG00000055240	1.34087	1.04317	1.4134	1.25507
4933434E20Rik	ENSMUSG00000027942	1.5568	1.3075	0.970605	1.25479
Acd	ENSMUSG00000038000	0.914397	1.34811	1.60077	1.25429
Zfyve27	ENSMUSG00000018820	1.35229	1.19804	1.21764	1.25416
Asb8	ENSMUSG00000048175	1.05118	1.46706	1.27822	1.25384
Mks1	ENSMUSG00000034121	1.26712	1.22203	1.27258	1.2537
Zfp871	ENSMUSG00000024298	1.27348	1.36069	1.13716	1.25369
Rnf181	ENSMUSG00000055850	0.92017	1.58324	1.35199	1.25352
Mkrn3	ENSMUSG00000070527	1.49419	1.2444	1.05887	1.25334
Prorsd1	ENSMUSG00000032673	1.20111	1.25103	1.30911	1.25297
Zfp445	ENSMUSG00000047036	1.17523	1.3692	1.22222	1.25289
BC003331	ENSMUSG00000006010	1.44064	1.21384	1.12441	1.2528
Dennd1b	ENSMUSG00000056268	1.26865	1.09074	1.42086	1.25277
Mto1	ENSMUSG00000032342	1.71176	0.912108	1.25798	1.25234
C330007P06Rik	ENSMUSG00000006423	1.13416	1.29763	1.33441	1.25229
1110054O05Rik	ENSMUSG00000038544	1.5001	1.17678	1.11219	1.25218
Zfyve28	ENSMUSG00000037224	1.09767	1.17698	1.51853	1.25186
Rif1	ENSMUSG00000036202	1.58007	1.07421	1.15435	1.25132
Uevld	ENSMUSG00000043262	0.924989	1.40801	1.50267	1.25084
Fbxo17	ENSMUSG00000030598	0.920618	1.18055	1.80022	1.25073
Syt9	ENSMUSG00000062542	1.05938	1.4171	1.30091	1.24997
Cnst	ENSMUSG00000038949	1.29474	1.08938	1.38437	1.24989
Srsf5	ENSMUSG00000021134	1.35957	1.27189	1.12844	1.24962
Ptgis	ENSMUSG00000017969	1.20464	1.42118	1.13942	1.24948
Lysmd1	ENSMUSG00000053769	1.59216	1.09332	1.12041	1.24941
2810403A07Rik	ENSMUSG00000028060	1.66653	1.00561	1.16265	1.24901
Ap1g1	ENSMUSG00000031731	1.09068	1.21114	1.47435	1.24882
AK034716	ENSMUSG00000032203	1.37944	1.05446	1.33854	1.24869
Gcnt2	ENSMUSG00000021360	1.07494	1.29056	1.40318	1.24861
nek2	ENSMUSG00000026622	1.06549	1.26337	1.44575	1.24851
Ino80	ENSMUSG00000034154	1.70788	1.02996	1.10558	1.24821
Tceal7	ENSMUSG00000079428	1.60396	1.04221	1.16282	1.24802
Poc5	ENSMUSG00000021671	1.33305	1.14071	1.27677	1.24751
Zfp449	ENSMUSG00000073176	1.14925	1.38509	1.21924	1.24737
n/a	2610044O15Rik	1.24604	0.986922	1.57711	1.24707
Foxn4	ENSMUSG00000042002	1.35268	1.09888	1.30389	1.2468
Ralgps1	ENSMUSG00000038831	0.94033	1.44149	1.42805	1.24627
Snx16	ENSMUSG00000027534	1.57262	1.07299	1.1455	1.24567
Cyp51	ENSMUSG00000001467	1.35037	1.28706	1.11197	1.24561
Usp48	ENSMUSG00000043411	1.31244	1.26026	1.16828	1.24555
Nop58	ENSMUSG00000026020	1.40998	1.26385	1.08413	1.24546
Lig4	ENSMUSG00000049717	1.31782	1.02388	1.42983	1.24489
Zcchc6	ENSMUSG00000035248	1.32278	1.23642	1.17927	1.24477
Adipor2	ENSMUSG00000030168	1.11371	1.45897	1.18617	1.24448
Rufy2	ENSMUSG00000020070	1.11343	1.39106	1.24352	1.24419
Prr24	ENSMUSG00000091811	1.3168	1.4331	1.02001	1.24394
Gcc1	ENSMUSG00000029708	1.47926	1.38425	0.939731	1.24381
BC085231	ENSMUSG00000078875	1.23887	1.17092	1.32638	1.24377
Terf2ip	ENSMUSG00000033430	1.19288	1.10999	1.45302	1.24374
Setd5	ENSMUSG00000034269	1.20572	1.28141	1.24484	1.24361
Prc1	ENSMUSG00000038943	1.01658	1.33108	1.42086	1.24346
2210404J11Rik	ENSMUSG00000036552	1.23031	1.47719	1.05781	1.24342
1500031L02Rik	ENSMUSG00000035790	1.23364	1.14806	1.35733	1.24341
Rnf170	ENSMUSG00000013878	1.29734	1.27272	1.1632	1.24303
AK158854	ENSMUSG00000030965	1.42464	1.17046	1.15106	1.24276
Pigw	ENSMUSG00000045140	1.04503	1.16591	1.57449	1.24254
Tmub1	ENSMUSG00000028958	1.09962	1.1702	1.49025	1.24238
Adck2	ENSMUSG00000046947	1.54666	1.25589	0.98664	1.24213
Sgo1	ENSMUSG00000023940	1.17557	1.20662	1.35036	1.24191
9430016H08Rik	ENSMUSG00000025971	1.2401	1.10597	1.39658	1.2419
Zdhhc7	ENSMUSG00000031823	1.28923	1.03961	1.42907	1.2419
2310057M21Rik	ENSMUSG00000040177	1.44476	1.01518	1.30456	1.24146
Rrm2b	ENSMUSG00000022292	1.08546	1.42607	1.23573	1.24134
Nploc4	ENSMUSG00000039703	1.19834	1.24533	1.28089	1.24106
Odf2l	ENSMUSG00000028256	0.953949	1.35476	1.47907	1.24106
2012-09-01	ENSMUSG00000000486	0.963037	1.35876	1.45966	1.24074
Birc2	ENSMUSG00000057367	1.16657	1.41005	1.16065	1.24055
Mgea5	ENSMUSG00000025220	1.54923	1.25282	0.983392	1.24045
Ssr2	ENSMUSG00000041355	1.02627	1.38694	1.3406	1.24034
Larp4	ENSMUSG00000023025	0.949064	1.33786	1.50219	1.24016
Lipt1	ENSMUSG00000037216	1.18003	1.06072	1.52358	1.24009
Pot1b	ENSMUSG00000024174	1.25339	1.10157	1.38121	1.24009
Gsg2	ENSMUSG00000050107	1.42932	1.12349	1.18753	1.24007
Giyd1	ENSMUSG00000059772	1.21974	1.37791	1.134	1.23984
Zfp260	ENSMUSG00000049421	1.20987	1.28318	1.22759	1.23982
Ccdc77	ENSMUSG00000030177	1.25456	1.33969	1.13357	1.2397
Traf6	ENSMUSG00000027164	1.35109	1.05725	1.3323	1.23924
Wdr5	ENSMUSG00000026917	0.999563	1.31114	1.4513	1.239
BC026590	ENSMUSG00000038827	1.38899	1.29383	1.05821	1.23894
Zscan18	ENSMUSG00000070822	1.66991	1.0073	1.13052	1.23892
Ccl25	ENSMUSG00000023235	1.6091	0.961747	1.22825	1.23873
Nkiras2	ENSMUSG00000017837	1.12403	1.49551	1.13062	1.23868
Pim3	ENSMUSG00000035828	1.51056	1.08221	1.16241	1.23862
Cwf19l1	ENSMUSG00000025200	1.54298	0.986317	1.24833	1.23852
Nfyb	ENSMUSG00000020248	1.16513	1.1651	1.39945	1.23851
Zik1	ENSMUSG00000030393	1.3306	1.06078	1.34565	1.23842
AK009699	ENSMUSG00000011832	1.12351	1.57605	1.07263	1.23841
Usp54	ENSMUSG00000034235	1.42075	1.31911	1.01308	1.23826
Slc3a2	ENSMUSG00000010095	1.44203	1.18304	1.11265	1.23816
Trim33	ENSMUSG00000033014	1.3947	1.17678	1.15594	1.23795
Zfp292	ENSMUSG00000039967	1.23161	1.19367	1.29011	1.23783
Esco1	ENSMUSG00000024293	1.33148	1.23089	1.15488	1.23698
Mras	ENSMUSG00000032470	1.04756	1.3706	1.31822	1.23697
9330129D05Rik	ENSMUSG00000042647	0.928285	1.29114	1.57882	1.23689
Zfp329	ENSMUSG00000057894	1.15252	1.11969	1.46555	1.23665
Dnase1l1	ENSMUSG00000019088	0.930053	1.46099	1.3901	1.23614
Hvcn1	ENSMUSG00000064267	0.912165	1.54899	1.33635	1.23599
Zfp868	ENSMUSG00000060427	1.28101	1.11861	1.31753	1.23594
Triml1	ENSMUSG00000031651	1.05824	1.27256	1.40183	1.23591
Ncor1	ENSMUSG00000018501	1.34133	1.2501	1.12539	1.23574
Cenph	ENSMUSG00000045273	1.05768	1.4107	1.2647	1.23574
Pigb	ENSMUSG00000079469	1.55185	1.03505	1.17431	1.23556
Stk38l	ENSMUSG00000001630	1.2695	1.22152	1.21615	1.23549
Tmem101	ENSMUSG00000020921	1.12917	1.27531	1.30938	1.23542
Usp7	ENSMUSG00000022710	1.25533	1.23818	1.2122	1.23511
Tsn	ENSMUSG00000026374	0.998986	1.44986	1.30055	1.23501
2310004I24Rik	ENSMUSG00000020910	1.12932	1.24494	1.33841	1.23458
Troap	ENSMUSG00000032783	1.3481	1.12273	1.24283	1.23444
Trappc5	ENSMUSG00000040236	1.01843	1.27735	1.44528	1.23424
Rbm12	ENSMUSG00000089824	1.48633	0.922682	1.3699	1.23392
Tmem167b	ENSMUSG00000068732	1.11005	1.48014	1.14337	1.23389
Tsen15	ENSMUSG00000014980	0.913437	1.38749	1.48201	1.23382
D330012F22Rik	ENSMUSG00000050973	1.13273	1.17029	1.41604	1.23357
Dtymk	ENSMUSG00000026281	1.19766	1.27769	1.2244	1.2328
Tmem135	ENSMUSG00000039428	1.08649	1.20714	1.42782	1.23259
Rttn	ENSMUSG00000023066	1.30094	1.04519	1.37676	1.23245
Rhod	ENSMUSG00000041845	1.23411	1.14103	1.32871	1.23224
Ttpa	ENSMUSG00000073988	1.44349	1.01611	1.27544	1.23217
Zfp707	ENSMUSG00000034429	1.24088	1.03728	1.45302	1.23206
Lpin3	ENSMUSG00000027412	1.36604	1.22677	1.11582	1.23199
Ccdc14	ENSMUSG00000022833	1.33007	1.09117	1.28793	1.23184
Orc4	ENSMUSG00000026761	1.14305	1.23026	1.32912	1.23181
Ube2d3	ENSMUSG00000078578	0.99225	1.32066	1.42559	1.2316
Zfp191	ENSMUSG00000051469	1.38243	1.18549	1.13986	1.23158
Zkscan5	ENSMUSG00000055991	1.44327	1.15089	1.1244	1.2315
Zfp286	ENSMUSG00000047342	1.02331	1.13642	1.60481	1.23119
Hspb1	ENSMUSG00000004951	0.95631	1.38215	1.41175	1.23113
Styx	ENSMUSG00000053205	1.00356	1.33618	1.3915	1.23111
Dse	ENSMUSG00000039497	1.07713	1.3281	1.30364	1.23089
Fam76b	ENSMUSG00000037808	1.1614	1.13776	1.41097	1.23079
Ccdc61	ENSMUSG00000074358	0.964949	1.43897	1.34194	1.23054
Galc	ENSMUSG00000021003	1.17785	1.32156	1.19699	1.23052
Srrm1	ENSMUSG00000028809	1.22381	1.16023	1.31156	1.23031
Zdhhc4	ENSMUSG00000001844	1.14819	1.36587	1.18709	1.23018
Gm71	ENSMUSG00000049882	1.58651	0.999667	1.17372	1.23014
Rnft2	ENSMUSG00000032850	1.04944	1.29849	1.3649	1.22979
Etnk1	ENSMUSG00000030275	0.923389	1.22791	1.63996	1.22969
mKIAA0720	ENSMUSG00000039713	1.32819	1.137	1.23	1.22926
Agtrap	ENSMUSG00000029007	1.15808	1.36131	1.1781	1.22921
B230219D22Rik	ENSMUSG00000045767	1.01861	1.32813	1.37201	1.22895
BC085231	ENSMUSG00000078893	1.29379	1.09857	1.30547	1.22881
Mylpf	ENSMUSG00000030672	0.957203	1.66793	1.16165	1.22863
Tcfcp2	ENSMUSG00000009733	1.12895	1.25776	1.30583	1.22853
Nfat5	ENSMUSG00000003847	1.5071	0.98591	1.24726	1.22832
Nrsn1	ENSMUSG00000048978	1.41924	1.19053	1.09674	1.22829
Kpna1	ENSMUSG00000022905	1.17454	1.26052	1.25057	1.22794
Zfp954	ENSMUSG00000062116	1.20694	1.17183	1.30793	1.22757
Wdr45l	ENSMUSG00000025173	1.11168	1.34521	1.23633	1.22735
Xkr5	ENSMUSG00000039814	1.38133	0.975453	1.37163	1.22719
Tmem44	ENSMUSG00000022537	1.15866	1.41695	1.12555	1.22713
Dok4	ENSMUSG00000040631	1.05835	1.11556	1.565	1.2271
Tbc1d9	ENSMUSG00000031709	1.60421	0.947642	1.21531	1.22706
Zxdc	ENSMUSG00000034430	1.48157	1.28961	0.966786	1.22698
Cobra1	ENSMUSG00000013465	1.17877	1.41142	1.10903	1.22652
Mus81	ENSMUSG00000024906	1.3029	1.30937	1.08143	1.22647
Hars2	ENSMUSG00000019143	1.21201	1.18282	1.28659	1.22637
Ccdc47	ENSMUSG00000078622	1.37249	1.34219	1.00074	1.22616
3230401D17Rik	ENSMUSG00000035399	1.4225	1.09267	1.185	1.2258
Ufd1l	ENSMUSG00000005262	1.21331	1.40341	1.08147	1.22572
Wdr73	ENSMUSG00000025722	1.10736	1.27866	1.29876	1.22515
Hells	ENSMUSG00000025001	1.24873	1.12007	1.31347	1.22474
Fam160b2	ENSMUSG00000022095	1.26267	1.34651	1.08005	1.22457
Tmx3	ENSMUSG00000024614	1.10445	1.32232	1.25683	1.22439
Kirrel2	ENSMUSG00000036915	1.15808	1.07796	1.47016	1.22434
Sec16a	ENSMUSG00000026924	1.3709	1.3278	1.00821	1.22432
Mcm10	ENSMUSG00000026669	1.47005	1.12014	1.11347	1.22394
Rmi1	ENSMUSG00000035367	1.3222	1.04655	1.32471	1.22385
Traip	ENSMUSG00000032586	1.26173	1.27415	1.13999	1.22376
Tmem69	ENSMUSG00000055900	1.28319	1.07729	1.32561	1.22371
Fam36a	ENSMUSG00000026500	1.02049	1.32906	1.3489	1.22305
Vmn2r-ps14	ENSMUSG00000052912	1.04069	1.24579	1.40959	1.2226
Mastl	ENSMUSG00000026779	1.39686	1.13879	1.14835	1.22243
Dsg2	ENSMUSG00000044393	1.05455	1.33756	1.29403	1.2221
Dmxl1	ENSMUSG00000037416	1.33518	1.10251	1.23952	1.22197
Zdhhc15	ENSMUSG00000033906	1.25106	1.04753	1.39227	1.22196
Zcchc4	ENSMUSG00000029179	1.41765	1.05671	1.21798	1.22195
Cyb5d2	ENSMUSG00000057778	1.48439	1.05612	1.16266	1.22153
Pex12	ENSMUSG00000018733	1.50446	1.23582	0.979809	1.22131
Rad51l1	ENSMUSG00000059060	0.950002	1.3412	1.42848	1.22095
Otud3	ENSMUSG00000041161	1.19814	1.18564	1.28086	1.22083
0610037P05Rik	ENSMUSG00000022677	1.09962	1.38786	1.19167	1.22062
Tmem41b	ENSMUSG00000047554	1.2184	1.13758	1.312	1.22058
Zfyve20	ENSMUSG00000014550	1.167	1.31373	1.18564	1.22042
Pex1	ENSMUSG00000005907	1.11487	1.12945	1.44313	1.2203
2310011J03Rik	ENSMUSG00000020133	1.21625	1.40208	1.06546	1.22023
Dcun1d2	ENSMUSG00000038506	0.997331	1.1139	1.63509	1.22014
Dpp7	ENSMUSG00000026958	1.2256	1.34195	1.10442	1.22013
Slx4	ENSMUSG00000039738	1.28672	1.14918	1.22833	1.2201
Atxn7	ENSMUSG00000021738	1.61544	1.20803	0.930652	1.22007
Tank	ENSMUSG00000064289	1.36093	1.09774	1.21557	1.22003
Zfp36l1	ENSMUSG00000021127	1.4372	1.33008	0.949595	1.21986
Morn4	ENSMUSG00000049670	1.02157	1.31614	1.3493	1.21963
Rg9mtd1	ENSMUSG00000044763	1.61961	0.979679	1.14211	1.21918
Camsap1	ENSMUSG00000026933	1.35143	1.33037	1.00745	1.21898
1700081L11Rik	ENSMUSG00000018412	1.44212	1.05791	1.18675	1.21881
Casc3	ENSMUSG00000078676	1.48467	1.01919	1.19619	1.2187
Arl6ip6	ENSMUSG00000026960	1.2288	1.13243	1.29884	1.2181
Yipf4	ENSMUSG00000024072	0.980429	1.33896	1.3764	1.21799
Vars2	ENSMUSG00000038838	1.12408	1.20531	1.33339	1.21792
Nphp3	ENSMUSG00000032558	1.05185	1.1504	1.4928	1.21787
Ddx52	ENSMUSG00000020677	1.17964	1.24226	1.23249	1.21782
Gm8898	ENSMUSG00000078898	1.0188	1.17379	1.50984	1.21769
Tmem39a	ENSMUSG00000002845	1.22445	1.1654	1.26405	1.21729
Ppp2r2a	ENSMUSG00000022052	1.35236	1.07579	1.23902	1.21702
Rnf4	ENSMUSG00000029110	1.3585	1.15591	1.14704	1.21671
Epc2	ENSMUSG00000069495	1.32526	1.10879	1.22553	1.21663
Hbp1	ENSMUSG00000002996	0.98809	1.33316	1.36687	1.21656
2610301B20Rik	ENSMUSG00000059482	1.39656	1.26452	1.01849	1.21613
1810008A18Rik	ENSMUSG00000032977	1.30689	1.23701	1.11162	1.21578
Tmem138	ENSMUSG00000024666	1.12968	1.45019	1.09676	1.21571
Lmtk3	ENSMUSG00000062044	1.44934	1.17994	1.05021	1.21554
Fgf11	ENSMUSG00000042826	1.01067	1.36712	1.29978	1.21552
AA408296	ENSMUSG00000016181	1.59358	0.958461	1.17486	1.21519
Kat2b	ENSMUSG00000000708	1.21128	1.17477	1.26078	1.2151
Cd38	ENSMUSG00000029084	1.21149	1.25766	1.17698	1.21493
Ankrd16	ENSMUSG00000047909	1.6406	1.10287	0.990944	1.21486
1700066M21Rik	ENSMUSG00000038323	0.951148	1.25034	1.50738	1.21479
Dmtf1	ENSMUSG00000042508	1.43488	1.18072	1.05759	1.21458
Fignl1	ENSMUSG00000035455	1.32927	1.09284	1.23304	1.21446
Pigm	ENSMUSG00000050229	1.13442	1.31887	1.19499	1.2137
Gtf2e2	ENSMUSG00000031585	0.927737	1.26105	1.523	1.21232
Dennd2c	ENSMUSG00000007379	1.02875	1.17649	1.47215	1.21232
Jbp1	ENSMUSG00000023110	1.15975	1.17368	1.30839	1.21214
Mrpl45	ENSMUSG00000018882	1.13759	1.2097	1.29398	1.21208
AK129341	ENSMUSG00000040729	1.40897	1.13457	1.11368	1.21199
Fbxl5	ENSMUSG00000039753	0.990418	1.43338	1.25367	1.21187
Pcmtd1	ENSMUSG00000051285	1.35332	1.2346	1.06509	1.21182
2210018M11Rik	ENSMUSG00000035401	1.57588	0.997074	1.13248	1.21179
2610101N10Rik	ENSMUSG00000032407	1.33401	1.14243	1.16705	1.2116
Dmxl2	ENSMUSG00000041268	1.23942	1.08989	1.31545	1.21123
BC099953	ENSMUSG00000078879	1.08155	1.21314	1.35359	1.21101
Grpel2	ENSMUSG00000024580	1.46216	1.19593	1.01547	1.21094
Sgsm1	ENSMUSG00000042216	1.03562	1.16245	1.47473	1.21087
Cabc1	ENSMUSG00000026489	1.22095	1.12737	1.28898	1.21061
Cwc25	ENSMUSG00000018541	1.43811	1.12966	1.09201	1.21056
Gm14403	ENSMUSG00000067480	1.26269	1.22905	1.14289	1.21048
Tex21	ENSMUSG00000021056	1.53203	1.22738	0.940203	1.20918
Nsun3	ENSMUSG00000050312	1.15929	1.67124	0.911636	1.20879
Usp49	ENSMUSG00000090115	1.18045	1.11901	1.33662	1.20864
Cd164	ENSMUSG00000019818	1.04576	1.37209	1.23038	1.20861
Dnajc4	ENSMUSG00000024963	1.13591	1.24772	1.24499	1.2084
Zfp213	ENSMUSG00000071256	1.47589	1.1151	1.07215	1.20839
Ficd	ENSMUSG00000053334	1.63896	0.942236	1.14153	1.20801
Mageh1	ENSMUSG00000047238	1.27093	1.23728	1.12075	1.20791
Ppp1r15b	ENSMUSG00000046062	1.03991	1.34651	1.25803	1.20772
AW549877	ENSMUSG00000041935	1.25471	1.05085	1.33579	1.20765
C630028N24Rik	ENSMUSG00000035878	1.03722	1.45186	1.16904	1.20747
Naga	ENSMUSG00000022453	0.948601	1.46801	1.26395	1.20739
Kdm4c	ENSMUSG00000028397	1.25606	1.06147	1.31991	1.20732
Fbxo45	ENSMUSG00000035764	1.07646	1.14716	1.42496	1.20728
Lrdd	ENSMUSG00000025507	1.59467	0.937462	1.1755	1.20675
D730040F13Rik	ENSMUSG00000055296	1.1825	1.11903	1.32616	1.20618
Ppm1b	ENSMUSG00000061130	1.12311	1.30377	1.19729	1.2058
Brca1	ENSMUSG00000017146	1.20083	1.15006	1.26807	1.20535
Taok2	ENSMUSG00000059981	1.40968	1.10682	1.12024	1.20458
Slbp	ENSMUSG00000004642	1.48945	1.0387	1.12931	1.20442
Prkab1	ENSMUSG00000029513	1.47518	1.20304	0.984386	1.20438
Ect2	ENSMUSG00000027699	0.95462	1.26453	1.44617	1.20409
Snw1	ENSMUSG00000021039	1.18499	1.24496	1.18319	1.20404
2700029M09Rik	ENSMUSG00000038005	0.943105	1.19484	1.54883	1.204
Eif1a	ENSMUSG00000057561	1.25804	1.20787	1.14769	1.20369
Rps6kb2	ENSMUSG00000024830	1.34454	1.14787	1.12939	1.20347
Dennd4a	ENSMUSG00000053641	1.18629	1.02431	1.43405	1.20336
Capn3	ENSMUSG00000062646	1.13886	1.27899	1.19622	1.20333
Rad51	ENSMUSG00000027323	1.11574	1.30333	1.19797	1.20325
Ift81	ENSMUSG00000029469	0.943293	1.48611	1.24162	1.2029
Ttc14	ENSMUSG00000027677	1.19956	1.31131	1.10575	1.20262
Tmed4	ENSMUSG00000004394	1.10529	1.29763	1.21206	1.2024
Gm8909	ENSMUSG00000073402	1.44567	1.12713	1.06678	1.20237
Hps3	ENSMUSG00000027615	1.39854	0.919101	1.35213	1.20232
Zfp606	ENSMUSG00000030386	1.18775	1.21415	1.2041	1.20195
Parp16	ENSMUSG00000032392	1.37696	1.23316	1.0226	1.20194
AK086881	ENSMUSG00000024019	1.22008	1.33565	1.06546	1.20191
Usp40	ENSMUSG00000005501	1.15804	1.28468	1.16695	1.20187
Ss18l1	ENSMUSG00000039086	1.29061	1.08808	1.23595	1.20176
Dbf4	ENSMUSG00000002297	1.15768	1.3127	1.14193	1.2017
Gpr107	ENSMUSG00000000194	1.30255	1.16912	1.1393	1.20161
Bambi	ENSMUSG00000024232	1.56569	1.00402	1.103	1.20137
Usp37	ENSMUSG00000033364	1.23046	1.19009	1.18339	1.20113
Thtpa	ENSMUSG00000045691	1.28197	0.974049	1.3875	1.20106
Polr2a	ENSMUSG00000005198	1.19674	1.36843	1.05779	1.201
Tubgcp5	ENSMUSG00000033790	1.24393	1.09116	1.27561	1.20079
Tstd2	ENSMUSG00000035495	1.50114	0.97907	1.17788	1.20073
Zbtb8b	ENSMUSG00000048485	0.941399	1.19738	1.5357	1.20071
Supt6h	ENSMUSG00000002052	1.44401	1.25634	0.953666	1.20049
Taf12	ENSMUSG00000028899	0.996678	1.29767	1.33706	1.2003
Lrrc8d	ENSMUSG00000046079	1.30256	1.42244	0.933148	1.20022
AK040741	ENSMUSG00000042579	0.973889	1.228	1.44481	1.19998
Pcyt1a	ENSMUSG00000005615	1.10362	1.27367	1.22915	1.19994
Pafah2	ENSMUSG00000037366	0.980195	1.4276	1.23436	1.19983
Wdr11	ENSMUSG00000042055	1.15849	1.15456	1.29096	1.1997
2012-03-08	ENSMUSG00000025702	1.07653	1.36106	1.17758	1.1994
Csrnp2	ENSMUSG00000044636	1.181	0.942986	1.54902	1.19933
B4galt7	ENSMUSG00000021504	1.24973	1.25098	1.10276	1.19908
BC064456	ENSMUSG00000058402	1.31331	0.93126	1.40852	1.19876
C030006K11Rik	ENSMUSG00000079002	1.44632	1.1359	1.04804	1.19856
1200016B10Rik	ENSMUSG00000052748	1.32272	1.00039	1.30093	1.19848
Cdk9	ENSMUSG00000009555	1.45751	1.16179	1.01655	1.19846
Zfp41	ENSMUSG00000047003	1.12597	1.24745	1.22395	1.19795
Dennd4c	ENSMUSG00000038024	1.30865	1.04169	1.26008	1.19763
Gm10012	ENSMUSG00000025730	1.28224	1.18089	1.13435	1.19759
Dtwd2	ENSMUSG00000024505	1.18734	1.06402	1.35847	1.19727
Rgs9bp	ENSMUSG00000056043	1.5363	1.15803	0.964479	1.19719
Invs	ENSMUSG00000028344	1.37385	1.17261	1.06422	1.19685
Trpt1	ENSMUSG00000047656	1.13586	1.36538	1.10539	1.19683
Ccdc99	ENSMUSG00000069910	1.28637	1.0989	1.21252	1.19675
Lrrn4cl	ENSMUSG00000071656	0.97849	1.5753	1.11151	1.19659
Slc7a6	ENSMUSG00000031904	1.03058	1.10815	1.50013	1.19657
1700019D03Rik	ENSMUSG00000043629	1.34318	1.2001	1.06256	1.19647
C330018D20Rik	ENSMUSG00000024592	1.42759	1.30618	0.918284	1.19636
Dhx36	ENSMUSG00000027770	1.08523	1.25183	1.25931	1.196
Cspp1	ENSMUSG00000056763	1.50436	1.02804	1.10582	1.19586
Dffb	ENSMUSG00000029027	1.37772	1.08025	1.14812	1.19552
Haus2	ENSMUSG00000027285	1.05602	1.30242	1.24193	1.19538
Btbd10	ENSMUSG00000038187	1.15724	1.11913	1.31651	1.19466
Zfp459	ENSMUSG00000055560	1.18701	0.956683	1.50096	1.19453
mKIAA1835	ENSMUSG00000022391	1.1393	1.25079	1.19607	1.19452
Tubgcp3	ENSMUSG00000000759	1.16578	1.0306	1.41792	1.19431
Orc6	ENSMUSG00000031697	1.21362	1.04481	1.34345	1.1943
Akap10	ENSMUSG00000047804	1.23741	1.07732	1.27756	1.19421
4930444A02Rik	ENSMUSG00000037251	1.00594	1.10247	1.53403	1.19378
Brsk1	ENSMUSG00000035390	1.33575	1.09978	1.15807	1.19377
Mysm1	ENSMUSG00000062627	1.08541	1.19252	1.31362	1.19356
Tspyl1	ENSMUSG00000047514	1.40369	1.10979	1.09148	1.19356
Dctn5	ENSMUSG00000030868	1.10583	1.37238	1.12034	1.19354
Blm	ENSMUSG00000030528	1.25962	1.0575	1.27622	1.19348
Pias2	ENSMUSG00000025423	1.05181	1.30121	1.24176	1.19336
Ndor1	ENSMUSG00000006471	1.26587	1.21892	1.10141	1.19336
Lrrc34	ENSMUSG00000027702	1.03445	1.1406	1.44033	1.19335
Rbm22	ENSMUSG00000024604	1.37329	1.15416	1.07124	1.19299
Lifr	ENSMUSG00000054263	1.06823	1.18976	1.33569	1.19292
Fam168b	ENSMUSG00000037503	1.08131	1.39404	1.12597	1.19285
Bub1	ENSMUSG00000027379	0.91373	1.31588	1.41088	1.19264
n/a	ENSMUSG00000048188	1.15206	1.19731	1.22982	1.19263
KRAZ1	ENSMUSG00000057409	1.26025	1.09443	1.22863	1.19221
Cdk10	ENSMUSG00000033862	1.11951	1.19155	1.26881	1.19173
2700049A03Rik	ENSMUSG00000034601	1.3849	1.09278	1.11809	1.19163
Pot1a	ENSMUSG00000029676	1.18891	1.10531	1.28702	1.19144
Gpc2	ENSMUSG00000029510	1.32626	1.01808	1.25135	1.19105
Abcb1a	ENSMUSG00000040584	1.19709	1.25578	1.12374	1.19098
Cd59a	ENSMUSG00000032679	1.03165	1.44767	1.13096	1.19092
Vps18	ENSMUSG00000034216	1.23413	1.23219	1.11072	1.19092
Ammecr1l	ENSMUSG00000041915	1.37549	1.11548	1.10073	1.19087
Sec62	ENSMUSG00000027706	1.36703	1.1696	1.05585	1.19071
Gosr1	ENSMUSG00000010392	1.37358	1.01754	1.20745	1.19058
Pde7a	ENSMUSG00000069094	1.60772	1.11971	0.937341	1.19052
Zscan20	ENSMUSG00000061894	1.2114	1.03735	1.34265	1.19049
AK007605	ENSMUSG00000021302	1.24338	1.16297	1.1668	1.19048
4933411K20Rik	ENSMUSG00000031631	1.15409	1.12058	1.30378	1.19022
Rbm41	ENSMUSG00000031433	1.12948	1.08255	1.3783	1.19003
Ttc9c	ENSMUSG00000071660	1.03858	1.32165	1.227	1.18978
Tacc1	ENSMUSG00000065954	1.27464	1.08919	1.21141	1.18922
Pafah1b1	ENSMUSG00000020745	0.96575	1.29468	1.34459	1.18906
Pign	ENSMUSG00000056536	0.95323	1.48205	1.1877	1.18829
Nupl2	ENSMUSG00000048439	1.41401	1.01748	1.16535	1.18799
Fbxo44	ENSMUSG00000029001	1.32017	1.25412	1.01249	1.18792
Slc28a1	ENSMUSG00000025726	1.35084	1.0348	1.19898	1.18784
Siah1a	ENSMUSG00000036840	1.02955	1.12726	1.44398	1.1878
Ahctf1	ENSMUSG00000026491	1.24868	1.20307	1.1148	1.18754
Zfand5	ENSMUSG00000024750	1.153	1.25976	1.15211	1.18724
Mak16	ENSMUSG00000031578	1.25825	1.0245	1.29621	1.18664
H3f3b	ENSMUSG00000016559	1.37364	1.19258	1.01985	1.18658
Ppp1cc	ENSMUSG00000004455	0.989873	1.20533	1.39955	1.18638
Pkn3	ENSMUSG00000026785	1.0184	1.48758	1.10126	1.18603
BC022687	ENSMUSG00000037594	0.961892	1.298	1.33489	1.18563
Kcnab3	ENSMUSG00000018470	0.923603	1.38811	1.29775	1.18495
Tspyl2	ENSMUSG00000041096	1.32329	1.21097	1.03653	1.18429
Dsn1	ENSMUSG00000027635	1.17682	1.12776	1.25063	1.184
Chn1	ENSMUSG00000056486	1.1097	1.33733	1.11806	1.18387
Lnp	ENSMUSG00000009207	1.17743	1.12507	1.25107	1.1834
n/a	ENSMUSG00000074910	1.07941	1.27291	1.20546	1.18317
Klhl25	ENSMUSG00000055652	1.30518	1.04457	1.21448	1.18304
Atxn10	ENSMUSG00000016541	0.928271	1.3578	1.31194	1.18252
Pgbd1	ENSMUSG00000055313	1.18112	1.12524	1.24372	1.18237
2410042D21Rik	ENSMUSG00000027132	0.919152	1.24575	1.44338	1.18232
Bbs5	ENSMUSG00000063145	1.13897	1.07552	1.34893	1.18224
Cdc25c	ENSMUSG00000044201	1.11786	1.25925	1.1736	1.18215
Atxn3	ENSMUSG00000021189	1.22183	1.12634	1.19991	1.18198
Rsbn1	ENSMUSG00000044098	1.24824	1.0533	1.25532	1.18178
Zfp30	ENSMUSG00000047473	1.05129	1.24957	1.25619	1.18171
Mcm8	ENSMUSG00000027353	1.21226	1.18814	1.14427	1.18122
Lcor	ENSMUSG00000025019	1.0026	1.13182	1.45198	1.1811
Mtr	ENSMUSG00000021311	0.972308	1.28868	1.3128	1.18046
Akirin1	ENSMUSG00000023075	1.26331	1.21685	1.06962	1.1803
Prmt10	ENSMUSG00000037134	1.28084	0.934849	1.37313	1.18027
Atg5	ENSMUSG00000038160	0.975388	1.29988	1.29585	1.17999
Arfrp1	ENSMUSG00000038671	1.20947	1.26424	1.07422	1.17988
Trmt61a	ENSMUSG00000060950	1.49608	1.15259	0.952211	1.17974
Smarcad1	ENSMUSG00000029920	1.20009	1.16086	1.17856	1.17973
Ss18	ENSMUSG00000037013	1.15011	1.18725	1.20179	1.17952
Mat2b	ENSMUSG00000042032	1.0369	1.31028	1.20691	1.17921
Slc35e2	ENSMUSG00000042202	1.13186	1.12936	1.28226	1.17905
Sec61a2	ENSMUSG00000025816	1.13094	1.19676	1.20891	1.17837
Fam118a	ENSMUSG00000022434	1.02402	1.3046	1.22458	1.17831
AK037193	ENSMUSG00000056211	1.27275	1.14944	1.11818	1.17828
Zfp52	ENSMUSG00000051341	1.25426	1.21364	1.07354	1.17788
n/a	ENSMUSG00000063953	1.17169	1.07329	1.29939	1.17785
Ogfod2	ENSMUSG00000023707	1.30416	1.03919	1.20531	1.17772
D17H6S53E	ENSMUSG00000043311	0.935878	1.40158	1.24396	1.17728
Xylb	ENSMUSG00000035769	1.16919	1.09038	1.27958	1.17718
Pdcd2	ENSMUSG00000014771	1.0703	1.26011	1.20924	1.17709
Capza2	ENSMUSG00000015733	0.983834	1.30849	1.26611	1.17685
Kbtbd8	ENSMUSG00000030031	1.11246	1.07347	1.36476	1.17682
Slc4a5	ENSMUSG00000068323	1.10279	1.11024	1.32976	1.17642
AK037026	ENSMUSG00000047789	0.99106	1.16119	1.41346	1.17606
Stambp	ENSMUSG00000006906	1.37329	1.07038	1.10658	1.17605
A230046K03Rik	ENSMUSG00000034560	1.20474	1.2315	1.09571	1.17582
Cacnb1	ENSMUSG00000020882	1.2443	1.00591	1.29767	1.17548
AK088743	ENSMUSG00000091747	1.37275	1.18863	0.995033	1.17533
Amd2	ENSMUSG00000075232	1.14072	1.0991	1.29467	1.17524
Mpv17l	ENSMUSG00000022679	0.957582	1.32588	1.27827	1.17517
Cpsf7	ENSMUSG00000034820	1.47161	0.971603	1.13489	1.17511
Impact	ENSMUSG00000024423	0.923671	1.53165	1.14692	1.17509
Cdkn2aipnl	ENSMUSG00000020392	0.932867	1.32271	1.31468	1.17499
Als2	ENSMUSG00000026024	0.913101	1.26171	1.40735	1.17479
Usp38	ENSMUSG00000038250	1.10873	1.01818	1.43435	1.17427
Dpm1	ENSMUSG00000078919	1.07992	1.17215	1.27899	1.17421
1600012H06Rik	ENSMUSG00000050088	0.985968	1.2886	1.27406	1.17415
Epn2	ENSMUSG00000001036	1.33228	1.0913	1.11234	1.1738
Ercc5	ENSMUSG00000026048	1.237	1.08123	1.20882	1.17368
Coq9	ENSMUSG00000031782	1.24526	0.919152	1.41229	1.17361
Pycr2	ENSMUSG00000026520	0.99756	1.2468	1.29944	1.17354
Tmem120b	ENSMUSG00000054434	1.15637	0.966608	1.44492	1.17326
ACRP	ENSMUSG00000038816	0.924781	1.44942	1.20439	1.1731
Ube2l3	ENSMUSG00000038965	0.994308	1.28735	1.26076	1.17296
Upf3b	ENSMUSG00000036572	0.968555	1.21049	1.37618	1.17288
Rpain	ENSMUSG00000018449	1.07736	1.3091	1.14394	1.17286
Ppwd1	ENSMUSG00000021713	1.50109	0.923546	1.16364	1.17281
Kctd5	ENSMUSG00000016946	1.11268	1.24589	1.16335	1.1727
Dbt	ENSMUSG00000000340	1.21048	1.11607	1.19281	1.17239
Wrn	ENSMUSG00000031583	0.987859	1.15302	1.41469	1.17237
Sp3	ENSMUSG00000027109	1.14272	1.10455	1.27614	1.17221
Cradd	ENSMUSG00000045867	0.979042	1.30286	1.26215	1.17202
Tmem8b	ENSMUSG00000078716	1.06783	1.25388	1.20237	1.17201
Nars2	ENSMUSG00000018995	1.21601	1.06495	1.2431	1.17199
Rnf19a	ENSMUSG00000022280	1.25415	1.07427	1.19456	1.1719
Zswim3	ENSMUSG00000045822	1.36819	0.997534	1.17917	1.17188
Tfam	ENSMUSG00000003923	0.945342	1.26536	1.34538	1.17188
Tmem129	ENSMUSG00000019295	1.48572	1.11241	0.973399	1.17174
Arvcf	ENSMUSG00000000325	1.00992	1.10371	1.44286	1.17163
Tom1	ENSMUSG00000042870	0.988681	1.127	1.44195	1.17123
Abat	ENSMUSG00000057880	0.946337	1.22589	1.38401	1.17097
Tfip11	ENSMUSG00000029345	1.31035	1.10863	1.10467	1.17076
Bcl2l12	ENSMUSG00000003190	1.28996	1.1587	1.07313	1.17058
Oasl1	ENSMUSG00000041827	0.941052	1.46821	1.16081	1.17055
Med13	ENSMUSG00000034297	1.33291	1.06153	1.13325	1.17045
Alkbh5	ENSMUSG00000042650	1.0415	1.18122	1.30248	1.17018
Zfp74	ENSMUSG00000059975	1.36973	1.20281	0.972332	1.17008
Xrn1	ENSMUSG00000032410	1.09172	1.22932	1.19353	1.17005
Fbxo5	ENSMUSG00000019773	1.27947	1.04833	1.19342	1.16979
Polr3h	ENSMUSG00000022476	1.06459	1.21278	1.23925	1.16961
Peli1	ENSMUSG00000020134	1.14659	1.05842	1.31807	1.1695
Nsun4	ENSMUSG00000028706	0.98524	1.19024	1.36395	1.16948
Trip4	ENSMUSG00000032386	1.17726	1.15141	1.17909	1.16918
Ttl	ENSMUSG00000027394	1.02664	1.19169	1.30633	1.16917
Phf20	ENSMUSG00000038116	0.972139	1.22353	1.34354	1.16913
Uspl1	ENSMUSG00000041264	1.22513	1.08055	1.20691	1.16905
Foxj3	ENSMUSG00000032998	1.47216	1.16774	0.929298	1.16901
Matr3	ENSMUSG00000037236	1.13756	1.16867	1.20071	1.16869
C330006K01Rik	ENSMUSG00000039623	1.28413	1.23642	1.00442	1.16832
Usp22	ENSMUSG00000042506	1.19484	1.27099	1.04976	1.16819
Chek1	ENSMUSG00000032113	1.04958	1.11628	1.36059	1.16817
Pmpca	ENSMUSG00000026926	1.03935	1.25581	1.21975	1.16766
Rps19bp1	ENSMUSG00000051518	1.14523	1.18954	1.1683	1.16755
Msl2	ENSMUSG00000066415	1.16385	1.0514	1.30057	1.16753
Nap1l4	ENSMUSG00000059119	1.09869	1.20779	1.19859	1.16729
Zcchc8	ENSMUSG00000029427	1.34066	1.0281	1.15378	1.16724
Hs1bp3	ENSMUSG00000020605	0.918983	1.37452	1.25893	1.16722
Ap3s2	ENSMUSG00000063801	0.918661	1.35088	1.28062	1.16698
BC019943	ENSMUSG00000031577	1.16779	1.01556	1.33882	1.16662
Btbd9	ENSMUSG00000062202	1.35888	1.12265	1.0404	1.16648
Orc2	ENSMUSG00000026037	1.10395	1.13755	1.26322	1.16627
Sf3b3	ENSMUSG00000033732	1.29134	0.953871	1.28656	1.16588
D930014E17Rik	ENSMUSG00000031023	1.30622	1.16964	1.03706	1.1658
Tmem106b	ENSMUSG00000029571	1.19201	1.38319	0.960409	1.16557
Zfp251	ENSMUSG00000022526	1.07635	1.22048	1.20491	1.16541
Zcchc18	ENSMUSG00000031428	1.33848	1.12088	1.0549	1.16536
Rapgef6	ENSMUSG00000037533	1.27647	1.2412	0.998534	1.16521
Slc25a19	ENSMUSG00000020744	1.12451	1.02017	1.37865	1.1651
D6Wsu163e	ENSMUSG00000030347	0.980569	1.22861	1.31255	1.16503
mTOP3beta	ENSMUSG00000022779	1.2648	1.22157	1.02345	1.16503
Alg3	ENSMUSG00000033809	1.3874	1.10266	1.0335	1.16498
Vps13d	ENSMUSG00000020220	1.30501	1.09808	1.10301	1.16487
Ptar1	ENSMUSG00000074925	1.13709	1.11644	1.24467	1.16474
Lin7c	ENSMUSG00000027162	1.31974	1.15125	1.03985	1.16469
Mapk1	ENSMUSG00000063358	0.962551	1.28481	1.2774	1.16466
Ptpn21	ENSMUSG00000021009	1.16426	1.1679	1.16168	1.16461
Rev1	ENSMUSG00000026082	1.11289	1.05873	1.34055	1.16459
Fkbp5	ENSMUSG00000024222	0.952382	1.27028	1.30555	1.16458
Commd7	ENSMUSG00000056941	1.10955	1.41432	1.0051	1.16404
Rabep1	ENSMUSG00000020817	1.1327	1.27588	1.0905	1.16372
Pdk1	ENSMUSG00000006494	0.934578	1.31985	1.27676	1.16345
Ghdc	ENSMUSG00000017747	1.2866	1.00327	1.21974	1.16335
Gramd1a	ENSMUSG00000001248	1.19392	1.21206	1.08779	1.16327
Suv420h1	ENSMUSG00000045098	1.05163	1.11049	1.34736	1.16311
Glb1l	ENSMUSG00000026200	1.12589	1.4011	0.997426	1.1631
Pcnt	ENSMUSG00000001151	1.28355	1.03269	1.18676	1.16301
Ccdc151	ENSMUSG00000039632	1.10989	1.43762	0.985122	1.16271
Pigyl	ENSMUSG00000010607	1.1787	0.980681	1.35964	1.16266
B4galt6	ENSMUSG00000056124	0.920527	1.28614	1.32446	1.16177
Senp3	ENSMUSG00000005204	1.02744	1.16093	1.31442	1.16171
Depdc5	ENSMUSG00000037426	0.944193	1.19249	1.3924	1.1617
Ncapd3	ENSMUSG00000035024	1.21961	1.06246	1.20982	1.16167
Wdr7	ENSMUSG00000040560	1.22233	1.00383	1.27672	1.1614
Vps4b	ENSMUSG00000009907	1.01088	1.25167	1.23792	1.16134
H2-M5	ENSMUSG00000024459	1.10202	1.39981	1.01515	1.16126
Cnot1	ENSMUSG00000036550	1.11785	1.05309	1.32973	1.1611
Mettl6	ENSMUSG00000021891	1.09723	1.23466	1.15493	1.16091
Fbf1	ENSMUSG00000020776	1.17599	1.3528	0.983192	1.1608
Trip13	ENSMUSG00000021569	1.06093	1.20387	1.22453	1.16077
Zfp57	ENSMUSG00000036036	1.12632	1.13577	1.22223	1.16065
Pex13	ENSMUSG00000020283	1.00869	1.33671	1.15948	1.16061
Spty2d1	ENSMUSG00000049516	1.30674	1.17678	1.01655	1.16057
Srsf3	ENSMUSG00000071172	1.18	1.15851	1.14306	1.16043
n/a	ENSMUSG00000071748	1.0004	1.20711	1.29391	1.1604
Siah1b	ENSMUSG00000040749	1.32902	1.03045	1.1409	1.16039
Zmym4	ENSMUSG00000042446	1.32394	1.14143	1.03379	1.16034
Cog3	ENSMUSG00000034893	1.28504	1.08204	1.12323	1.16023
AK085963	ENSMUSG00000020610	0.913353	1.34554	1.27036	1.16008
Asf1b	ENSMUSG00000005470	1.13348	0.94435	1.4582	1.15999
Nt5dc3	ENSMUSG00000054027	1.1893	1.09859	1.19434	1.15989
D16Ertd472e	ENSMUSG00000022864	1.25636	0.998482	1.24374	1.15983
Clpx	ENSMUSG00000015357	1.04382	1.17861	1.26773	1.15969
C2cd3	ENSMUSG00000047248	1.07087	1.19995	1.21295	1.15944
B4galt3	ENSMUSG00000052423	1.19384	1.07725	1.21193	1.15944
Exoc8	ENSMUSG00000074030	1.02978	1.15704	1.30764	1.1593
Ent1	ENSMUSG00000023942	1.04931	1.13585	1.30684	1.15918
Zfp839	ENSMUSG00000021271	1.46362	0.92194	1.15416	1.15913
Spryd3	ENSMUSG00000036966	1.17275	1.09491	1.2126	1.15905
Fdxr	ENSMUSG00000018861	1.13795	1.03464	1.32187	1.15887
Esrrb	ENSMUSG00000021255	1.08447	1.28558	1.11592	1.15874
Cdv3	ENSMUSG00000032803	1.00581	1.22817	1.25783	1.15824
Cish	ENSMUSG00000032578	1.42305	0.960699	1.13626	1.15814
Gm14391	ENSMUSG00000078903	0.95719	1.1499	1.40892	1.15748
Pkp3	ENSMUSG00000054065	1.01536	1.33455	1.14428	1.15743
4833420G17Rik	ENSMUSG00000062822	0.989707	1.25486	1.2483	1.15737
Vprbp	ENSMUSG00000040325	1.34673	1.03385	1.11304	1.15722
n/a	Alms1	0.952491	1.14859	1.41641	1.15719
Rexo4	ENSMUSG00000052406	1.27445	1.06086	1.14613	1.15719
Lrpap1	ENSMUSG00000029103	1.14742	1.24562	1.08303	1.15678
Fbxo22	ENSMUSG00000032309	1.05386	1.13308	1.29536	1.1565
1200014J11Rik	ENSMUSG00000020783	1.20422	1.11993	1.14671	1.15642
Mtbp	ENSMUSG00000022369	1.16838	1.08178	1.22298	1.15624
Letmd1	ENSMUSG00000037353	1.17027	1.07308	1.23073	1.15618
Sdhaf2	ENSMUSG00000024668	1.19418	1.16583	1.11012	1.15618
Jagn1	ENSMUSG00000051256	1.26219	1.1515	1.06327	1.15614
Timm44	ENSMUSG00000002949	1.23457	0.918964	1.36187	1.15607
Mapk14	ENSMUSG00000053436	1.13485	1.20061	1.1339	1.15604
Zfp426	ENSMUSG00000059475	1.21783	1.22656	1.0331	1.15559
Smcr7	ENSMUSG00000018599	1.0408	1.31256	1.12618	1.15442
Diap1	ENSMUSG00000024456	1.10253	1.19176	1.1708	1.15439
Uros	ENSMUSG00000030979	1.13916	1.28723	1.04832	1.1541
Actr6	ENSMUSG00000019948	1.11264	1.1141	1.23912	1.1538
Psmf1	ENSMUSG00000032869	1.17925	1.12101	1.16106	1.15351
Abhd6	ENSMUSG00000025277	1.13146	0.932618	1.45398	1.15336
Gltpd1	ENSMUSG00000029073	1.19272	1.27478	1.00887	1.15328
Lztfl1	ENSMUSG00000025245	1.04073	1.19377	1.2345	1.15323
Tm6sf1	ENSMUSG00000038623	1.12457	0.938607	1.45297	1.15321
Lrrc49	ENSMUSG00000047766	1.17179	1.27192	1.02879	1.15313
AK049416	ENSMUSG00000061244	1.22979	1.1639	1.07097	1.15303
Muted	ENSMUSG00000038982	1.32568	1.11202	1.0394	1.15286
Itch	ENSMUSG00000027598	1.22661	0.986008	1.26687	1.15285
Spata7	ENSMUSG00000021007	1.04093	1.18198	1.24418	1.15249
Taf7	ENSMUSG00000051316	0.9419	1.35486	1.19912	1.15236
Cdc37l1	ENSMUSG00000024780	1.04336	1.16574	1.25777	1.15225
Dcaf5	ENSMUSG00000049106	1.20062	1.18264	1.07739	1.15224
Tmem185b	ENSMUSG00000037015	0.987486	1.34167	1.1546	1.15222
Sc4mol	ENSMUSG00000031604	0.921645	1.14809	1.44564	1.15222
Neu3	ENSMUSG00000035239	1.04573	1.18313	1.23637	1.15222
mKIAA4252	ENSMUSG00000033943	1.21007	1.05363	1.19935	1.15208
2410089E03Rik	ENSMUSG00000039801	1.10001	1.26595	1.0977	1.15195
Fem1a	ENSMUSG00000043683	1.39106	1.12924	0.972916	1.15187
Tmed2	ENSMUSG00000029390	0.976393	1.36414	1.14713	1.15177
Gm14288	ENSMUSG00000078901	1.19015	1.0731	1.19603	1.15167
AK086005	ENSMUSG00000074513	1.04861	1.19959	1.2141	1.1516
Tnks2	ENSMUSG00000024811	0.965778	1.29019	1.22539	1.15151
BC004004	ENSMUSG00000052712	1.37201	1.17153	0.949126	1.15118
Sumf1	ENSMUSG00000030101	1.2345	1.29665	0.95272	1.15105
Cops8	ENSMUSG00000034432	1.13876	1.16237	1.15174	1.15091
Csnk1d	ENSMUSG00000025162	1.15485	1.30149	1.01373	1.1507
Dgcr14	ENSMUSG00000003527	1.44484	0.950458	1.10933	1.15064
Stxbp3a	ENSMUSG00000027882	1.24219	1.02618	1.1933	1.15006
Tesk2	ENSMUSG00000033985	1.25692	1.25988	0.959179	1.14951
Btg3	ENSMUSG00000022863	1.29384	1.11373	1.05393	1.14945
Sirt7	ENSMUSG00000025138	1.38166	0.97471	1.1276	1.14942
Rab8a	ENSMUSG00000003037	1.02367	1.15483	1.28406	1.14927
Wwp1	ENSMUSG00000041058	1.04588	1.16146	1.24929	1.14917
Cdkl3	ENSMUSG00000020389	1.20633	1.11293	1.12994	1.14903
n/a	ENSMUSG00000040573	1.19586	1.14733	1.10564	1.14902
Stard3	ENSMUSG00000018167	1.31812	1.11707	1.0302	1.14899
Cenpl	ENSMUSG00000026708	1.16716	1.13891	1.14084	1.1489
Haus8	ENSMUSG00000035439	0.942993	1.21681	1.32119	1.14877
Npepps	ENSMUSG00000001441	1.06386	1.22434	1.16365	1.14869
Vps54	ENSMUSG00000020128	1.19425	1.36419	0.930247	1.14866
Dnajb1	ENSMUSG00000005483	1.18013	1.01608	1.26322	1.14845
Fbxo42	ENSMUSG00000028920	1.12582	1.10301	1.21929	1.14829
Pvr	ENSMUSG00000040511	1.1919	1.04914	1.21077	1.14827
Nfrkb	ENSMUSG00000042185	1.37039	0.970572	1.13773	1.14808
Ccdc59	ENSMUSG00000019897	1.32268	0.985315	1.16095	1.14802
Mtb	ENSMUSG00000042029	1.06032	1.14844	1.2418	1.1478
Ankle2	ENSMUSG00000029501	1.24386	1.12013	1.08479	1.14761
Gm14420	ENSMUSG00000078866	1.28781	1.13028	1.03797	1.14747
Ktelc1	ENSMUSG00000034064	0.981846	1.14475	1.34414	1.14745
AK045807	ENSMUSG00000021557	1.03869	1.18225	1.23019	1.14742
1700021K19Rik	ENSMUSG00000035629	1.16077	1.01365	1.28347	1.14729
Ctcf	ENSMUSG00000005698	1.1715	1.0279	1.25389	1.14723
Mterfd1	ENSMUSG00000021519	0.951842	1.15161	1.37725	1.14717
Sgtb	ENSMUSG00000042743	1.20314	1.08224	1.15843	1.14684
Ccdc93	ENSMUSG00000026339	1.04012	1.24893	1.16085	1.14674
pcm-1	ENSMUSG00000031592	1.12552	1.05496	1.26961	1.14662
AK029418	ENSMUSG00000019124	1.04385	1.28395	1.12466	1.14658
Cenpq	ENSMUSG00000023919	1.27984	1.06171	1.10895	1.14646
Rtn4ip1	ENSMUSG00000019864	1.17231	1.0905	1.17761	1.1461
Wdr92	ENSMUSG00000078970	0.923356	1.30224	1.25174	1.14602
4930547N16Rik	ENSMUSG00000035365	1.02697	1.16675	1.25597	1.14597
Kntc1	ENSMUSG00000029414	1.15918	1.13362	1.14506	1.14591
Gde1	ENSMUSG00000033917	1.31818	1.00787	1.13124	1.14545
Wdr82	ENSMUSG00000020257	1.02033	1.17292	1.25513	1.14525
Pacrgl	ENSMUSG00000029089	1.16335	1.11462	1.15835	1.14523
Pnldc1	ENSMUSG00000073460	1.23537	1.00504	1.20966	1.1452
Ccdc127	ENSMUSG00000021578	1.17215	1.10092	1.16382	1.14518
Klhl28	ENSMUSG00000020948	1.18785	1.3161	0.959759	1.14482
Mphosph8	ENSMUSG00000079184	1.23177	1.03214	1.18004	1.14478
Tfdp2	ENSMUSG00000032411	0.951998	1.22287	1.28853	1.14473
Lpar2	ENSMUSG00000031861	0.958793	1.11468	1.40205	1.14432
4933427D14Rik	ENSMUSG00000020807	1.40429	0.96434	1.10543	1.14395
Sec22b	ENSMUSG00000027879	1.01097	1.20913	1.2246	1.14394
Mlh1	ENSMUSG00000032498	1.29689	1.12357	1.02707	1.14385
Slc25a30	ENSMUSG00000022003	1.01685	1.10261	1.33099	1.14275
Rprd2	ENSMUSG00000028106	1.36783	0.965323	1.12993	1.14266
Ap4b1	ENSMUSG00000032952	1.02565	1.24293	1.16931	1.14233
Fam108b	ENSMUSG00000047368	1.14268	1.03473	1.25978	1.14204
BC020402	ENSMUSG00000019795	1.22061	1.19541	1.02077	1.14202
Rhof	ENSMUSG00000029449	0.915299	1.33197	1.22088	1.14177
Drg1	ENSMUSG00000020457	0.99916	1.26249	1.17989	1.14175
Map4k2	ENSMUSG00000024948	1.1401	1.13654	1.14806	1.14156
E2f7	ENSMUSG00000020185	1.22255	0.940561	1.2935	1.14149
C77370	ENSMUSG00000046449	1.26345	1.17948	0.996944	1.14106
Akirin2	ENSMUSG00000028291	1.24278	1.07551	1.11136	1.141
Tgfbrap1	ENSMUSG00000070939	1.22054	1.09294	1.11348	1.14098
Zfp64	ENSMUSG00000027551	1.07497	1.24368	1.11077	1.14089
Cog4	ENSMUSG00000031753	1.21416	1.0455	1.16969	1.14084
E130306D19Rik	ENSMUSG00000051517	0.968092	1.13145	1.35555	1.14083
Ubxn7	ENSMUSG00000053774	1.0274	1.1294	1.27864	1.14054
Sarnp	ENSMUSG00000078427	0.959865	1.19719	1.28955	1.14008
Folr1	ENSMUSG00000001827	1.18305	1.14546	1.09299	1.1399
mKIAA4196	ENSMUSG00000063108	1.30463	1.00222	1.13275	1.13989
Fuz	ENSMUSG00000011658	0.936196	1.23912	1.27636	1.13977
Scai	ENSMUSG00000035236	1.26213	0.978526	1.19814	1.13954
Ptpn11	ENSMUSG00000043733	1.00327	1.33641	1.10355	1.13951
Rqcd1	ENSMUSG00000026174	1.14283	1.14217	1.13277	1.13925
G5pr	ENSMUSG00000021022	1.14806	1.10717	1.16196	1.13882
Tle6	ENSMUSG00000034758	1.00375	1.19118	1.23521	1.1388
Nudcd3	ENSMUSG00000053838	1.00081	1.18593	1.24339	1.13852
Ddx50	ENSMUSG00000020076	1.15172	1.21226	1.05667	1.1384
Epb4.1l4b	ENSMUSG00000028434	0.95302	1.106	1.39911	1.13825
Wdr20a	ENSMUSG00000037957	1.25261	1.00301	1.17189	1.13763
Bzw1	ENSMUSG00000051223	0.950921	1.29965	1.19126	1.13761
Ippk	ENSMUSG00000021385	1.10946	1.07614	1.23043	1.13679
Kiaa0892	ENSMUSG00000031858	1.17725	1.10426	1.12969	1.13667
Larp4b	ENSMUSG00000033499	1.18942	1.0912	1.13112	1.13654
Rnf13	ENSMUSG00000036503	1.18581	1.13134	1.094	1.13643
Pqlc2	ENSMUSG00000028744	1.24271	1.22814	0.960882	1.13613
Hltf	ENSMUSG00000002428	1.12742	1.07073	1.21382	1.13581
Cdc42se2	ENSMUSG00000052298	1.16457	1.16009	1.08441	1.13575
Zbtb25	ENSMUSG00000056459	1.04205	1.10492	1.27205	1.13564
Mterfd2	ENSMUSG00000026273	1.20185	1.09123	1.11634	1.1355
Zfp518b	ENSMUSG00000046572	1.15431	1.17225	1.08193	1.13548
Wdr59	ENSMUSG00000031959	1.15882	0.944808	1.33659	1.13532
Capn10	ENSMUSG00000026270	0.934746	1.17095	1.33672	1.13525
Ndel1	ENSMUSG00000018736	1.11171	1.25644	1.04675	1.13499
Yes1	ENSMUSG00000014932	1.08372	1.13484	1.18851	1.13489
Polr3f	ENSMUSG00000027427	0.992726	1.172	1.25493	1.13447
Zfp161	ENSMUSG00000049672	0.95906	1.22043	1.2472	1.1344
Syap1	ENSMUSG00000031357	0.911091	1.3444	1.19147	1.13429
Timm22	ENSMUSG00000020843	1.12586	1.15707	1.12025	1.13428
Wdr67	ENSMUSG00000022364	0.953507	1.19802	1.27728	1.13421
Ebag9	ENSMUSG00000022339	1.06281	1.20937	1.13373	1.13373
FuK	ENSMUSG00000033703	0.946714	1.14404	1.34462	1.1335
Smc5	ENSMUSG00000024943	1.17568	1.05144	1.17802	1.13347
Ube2w	ENSMUSG00000025939	1.04259	1.14627	1.21833	1.13341
Srcrb4d	ENSMUSG00000029699	1.32773	1.15516	0.949253	1.13339
Tmem128	ENSMUSG00000067365	1.13315	1.20649	1.06487	1.13336
Lasp1	ENSMUSG00000038366	1.00114	1.26979	1.14488	1.13326
Bard1	ENSMUSG00000026196	1.26	1.03309	1.11805	1.13324
Samd8	ENSMUSG00000021770	1.00563	1.17296	1.23369	1.13321
BC017643	ENSMUSG00000039294	1.26605	1.16915	0.982878	1.13311
Klhl9	ENSMUSG00000070923	1.18231	1.25347	0.980796	1.13277
Otud7b	ENSMUSG00000038495	1.01663	1.25177	1.14195	1.13269
Dhx35	ENSMUSG00000027655	1.16206	1.11795	1.11831	1.13259
Cog8	ENSMUSG00000031916	1.27533	1.1014	1.03352	1.1323
Ppox	ENSMUSG00000062729	0.987535	1.28343	1.14504	1.13218
Cnih2	ENSMUSG00000024873	1.01133	1.26156	1.13713	1.13206
Mrpl50	ENSMUSG00000044018	0.952983	1.10373	1.37881	1.13192
Fxr2	ENSMUSG00000018765	1.20771	1.03324	1.16139	1.13165
Mre11a	ENSMUSG00000031928	1.34211	0.975299	1.10664	1.13147
Ttc3	ENSMUSG00000040785	1.13298	1.17897	1.08429	1.13142
Vcpip1	ENSMUSG00000045210	1.12383	1.10833	1.16251	1.13132
Eif4a1	ENSMUSG00000059796	0.971087	1.15411	1.29183	1.13128
Golt1b	ENSMUSG00000030245	1.04131	1.23344	1.1272	1.13127
Zdhhc1	ENSMUSG00000039199	1.27928	1.10084	1.02797	1.13125
Tgs1	ENSMUSG00000028233	1.17797	1.00343	1.22351	1.13086
Ccdc18	ENSMUSG00000056531	0.951024	1.19144	1.27632	1.13086
Dnase2a	ENSMUSG00000003812	0.978996	1.18498	1.24654	1.13084
SMN	ENSMUSG00000021645	1.16538	0.968816	1.28046	1.13073
Fbxo8	ENSMUSG00000038206	1.23064	0.983328	1.19459	1.13071
Patl1	ENSMUSG00000046139	1.40984	0.912453	1.12294	1.13044
Arl5a	ENSMUSG00000036093	1.05749	1.18862	1.14896	1.13034
Uggt1	ENSMUSG00000037470	1.06311	1.16961	1.1613	1.13029
Edc3	ENSMUSG00000038957	1.17925	1.09606	1.11563	1.12976
Tbc1d10b	ENSMUSG00000042492	1.05778	1.2128	1.12386	1.12971
Dpy19l4	ENSMUSG00000045205	1.20215	1.208	0.992805	1.1297
Ccdc88c	ENSMUSG00000021182	1.17737	1.10292	1.10996	1.12959
Slc27a1	ENSMUSG00000031808	0.980792	1.12606	1.30415	1.12933
Emid1	ENSMUSG00000034164	1.31874	0.966913	1.12929	1.12923
Rnf185	ENSMUSG00000020448	1.12617	1.11555	1.14585	1.12912
Polr2g	ENSMUSG00000071662	0.949342	1.21247	1.25053	1.12909
Ogg1	ENSMUSG00000030271	1.0453	1.23283	1.11658	1.12896
Rnf40	ENSMUSG00000030816	1.178	1.15278	1.05897	1.12873
Lpcat1	ENSMUSG00000021608	0.916141	1.22164	1.28436	1.12858
Get4	ENSMUSG00000025858	0.994055	1.15595	1.24984	1.12824
Ino80c	ENSMUSG00000047989	1.02788	1.20611	1.15842	1.12823
Vps37a	ENSMUSG00000031600	0.985905	1.15833	1.25754	1.12823
Ofd1	ENSMUSG00000040586	0.963786	1.31757	1.13056	1.12811
Chuk	ENSMUSG00000025199	1.04266	1.14659	1.19981	1.12777
Sae1	ENSMUSG00000052833	0.95294	1.25541	1.19848	1.12762
Zfhx3	ENSMUSG00000038872	0.994663	1.22873	1.17137	1.12705
Med10	ENSMUSG00000021598	0.992709	1.29977	1.10952	1.12704
Tsnax	ENSMUSG00000056820	0.955301	1.20523	1.24337	1.12703
Fmn2	ENSMUSG00000028354	1.32232	0.978925	1.10543	1.12687
Usp1	ENSMUSG00000028560	1.13299	1.00533	1.25618	1.12684
Myo1e	ENSMUSG00000032220	0.96753	1.19607	1.23608	1.12674
mKIAA4051	ENSMUSG00000015522	1.11056	1.13097	1.13817	1.12651
Cdk2	ENSMUSG00000025358	1.04029	1.19381	1.15066	1.12636
Eif4g2	ENSMUSG00000005610	1.05597	1.20935	1.11868	1.12626
Pitpnb	ENSMUSG00000050017	0.949975	1.2676	1.18581	1.12608
Mbtd1	ENSMUSG00000059474	1.28066	1.10692	1.00696	1.12595
Dcun1d3	ENSMUSG00000048787	1.04979	1.16671	1.16535	1.12592
Spag5	ENSMUSG00000002055	1.12452	1.17658	1.07807	1.12567
n/a	ENSMUSG00000080238	0.910609	1.23426	1.26909	1.12567
Sykb	ENSMUSG00000021457	1.1567	1.14016	1.08147	1.12564
Wdr1	ENSMUSG00000005103	1.31591	1.16926	0.926906	1.12562
Pibf1	ENSMUSG00000022064	1.08669	1.16006	1.13113	1.12556
n/a	ENSMUSG00000079605	1.10295	1.05796	1.22104	1.12526
Tmem183a	ENSMUSG00000042305	1.11507	1.16831	1.09344	1.12517
Mpzl3	ENSMUSG00000070305	1.17096	0.952475	1.27643	1.12494
Tmem192	ENSMUSG00000025521	1.20896	1.06617	1.1042	1.12485
Hnrnph3	ENSMUSG00000020069	0.999264	1.26201	1.12847	1.12481
Clcc1	ENSMUSG00000027884	1.05529	1.11071	1.21364	1.12466
Fxr1	ENSMUSG00000027680	0.953178	1.24496	1.19699	1.12411
Sharpin	ENSMUSG00000022552	1.14805	1.13439	1.08965	1.12375
Nbr1	ENSMUSG00000017119	1.03118	1.21063	1.13491	1.12315
AK088822	ENSMUSG00000038563	1.26222	1.00561	1.1152	1.12281
Ube3a	ENSMUSG00000025326	1.18644	1.01553	1.17476	1.12278
Adal	ENSMUSG00000027259	1.2463	0.93621	1.21266	1.12265
Mbtps1	ENSMUSG00000031835	0.961665	1.13294	1.29846	1.12259
Wdr44	ENSMUSG00000036769	1.26379	0.910173	1.22902	1.12233
Ddx11	ENSMUSG00000035842	1.13418	1.13408	1.09899	1.12229
Itgam	ENSMUSG00000030786	1.21739	1.16746	0.99446	1.12224
Nmd3	ENSMUSG00000027787	1.11536	1.07764	1.17532	1.12206
Brwd1	ENSMUSG00000022914	0.92036	1.24852	1.22901	1.12194
Pi4k2a	ENSMUSG00000025178	1.05327	1.20318	1.11416	1.12186
Mterfd3	ENSMUSG00000049038	0.927742	1.17323	1.29673	1.12172
Map2k7	ENSMUSG00000002948	1.16432	0.951342	1.27407	1.12168
Dhx15	ENSMUSG00000029169	1.16281	1.07535	1.12858	1.12167
Zmym5	ENSMUSG00000040123	1.21237	1.10867	1.04983	1.12164
Cdca8	ENSMUSG00000028873	1.03165	1.22102	1.12002	1.12157
0610007P22Rik	ENSMUSG00000015126	1.19509	1.27327	0.926591	1.12134
Trpm4	ENSMUSG00000038260	1.09922	1.16247	1.10283	1.12113
Sat1	ENSMUSG00000025283	0.935163	1.2319	1.22298	1.12105
Gosr2	ENSMUSG00000020946	1.25319	1.18739	0.945849	1.12067
Itpk1	ENSMUSG00000057963	1.12204	0.988241	1.26889	1.12055
Arcn1	ENSMUSG00000032096	0.987003	1.20765	1.18029	1.12051
Calr	ENSMUSG00000003814	0.969765	1.16064	1.24971	1.12045
Trap1a	ENSMUSG00000051257	1.0495	1.2109	1.10565	1.12005
Phyhip	ENSMUSG00000003469	1.16143	0.957003	1.26281	1.11965
Papola	ENSMUSG00000021111	0.954924	1.28775	1.14095	1.1195
Foxo3	ENSMUSG00000048756	1.00587	1.11577	1.25009	1.11949
Zfp451	ENSMUSG00000042197	1.13362	1.12236	1.10236	1.11937
Ddx42	ENSMUSG00000020705	1.20126	1.11732	1.04487	1.11933
Pomt1	ENSMUSG00000039254	1.17137	1.02523	1.16761	1.11928
Zbtb34	ENSMUSG00000068966	1.12055	0.965288	1.29603	1.11918
Cnot6	ENSMUSG00000020362	1.11548	1.25008	1.00525	1.11916
Zfp623	ENSMUSG00000050846	1.25602	1.00386	1.11169	1.11914
C330021F23Rik	ENSMUSG00000065952	1.17736	1.05213	1.13133	1.11907
Pusl1	ENSMUSG00000051557	1.27135	1.16854	0.943074	1.11897
Rom1	ENSMUSG00000071648	1.02767	1.23159	1.10689	1.11894
Poll	ENSMUSG00000025218	1.03844	1.16924	1.1528	1.11861
Gba	ENSMUSG00000028048	1.14564	1.29931	0.94025	1.11858
Mllt10	ENSMUSG00000026743	1.19454	1.01251	1.15659	1.11839
6330503K22Rik	ENSMUSG00000033904	1.01017	1.1223	1.23352	1.11828
Kif11	ENSMUSG00000012443	1.03745	1.10252	1.22223	1.11816
Dolpp1	ENSMUSG00000026856	1.13093	1.13513	1.08878	1.11808
Zfp180	ENSMUSG00000057101	1.16497	1.04892	1.14336	1.11793
Def8	ENSMUSG00000001482	0.923142	1.12435	1.34516	1.11767
Mcoln1	ENSMUSG00000004567	1.14955	1.05367	1.15262	1.11765
Dus4l	ENSMUSG00000020648	1.18035	0.955403	1.23792	1.11763
Fam134b	ENSMUSG00000022270	0.993242	1.22121	1.15081	1.11759
Sf3b1	ENSMUSG00000025982	1.15211	1.09023	1.11067	1.11738
Fam118b	ENSMUSG00000050471	0.933687	1.29819	1.15042	1.1172
Lss	ENSMUSG00000033105	1.12891	1.05915	1.16528	1.11691
Pole4	ENSMUSG00000030042	0.952041	1.15603	1.26571	1.11683
Epb4.1l4a	ENSMUSG00000024376	0.99848	1.16464	1.19704	1.11656
Cpsf4	ENSMUSG00000029625	1.10761	1.23209	1.01968	1.11643
Ube2z	ENSMUSG00000014349	1.02776	1.16615	1.15928	1.11587
Mfap1a	ENSMUSG00000068479	1.17552	1.10411	1.07018	1.11575
Mudeng	ENSMUSG00000036291	0.970775	1.12415	1.2721	1.11555
n/a	ENSMUSG00000078134	1.07468	1.13352	1.13932	1.11545
1110034A24Rik	ENSMUSG00000020973	1.24939	0.974838	1.1394	1.11541
Mkks	ENSMUSG00000027274	1.04664	1.11994	1.18311	1.11517
Slc25a46	ENSMUSG00000024259	1.04805	1.13578	1.16172	1.11411
Xrn2	ENSMUSG00000027433	1.01767	1.21426	1.11899	1.11407
Thap1	ENSMUSG00000037214	1.2817	0.910749	1.18436	1.11401
C78339	ENSMUSG00000069237	0.956722	1.25095	1.15458	1.11383
AK050859	ENSMUSG00000071723	1.31419	0.939545	1.11895	1.11377
Sh3bp4	ENSMUSG00000036206	1.12946	1.10839	1.10326	1.11365
Spc25	ENSMUSG00000005233	0.975407	1.12895	1.25307	1.1133
G2e3	ENSMUSG00000035293	1.31136	0.946392	1.11133	1.11313
Zfp937	ENSMUSG00000060336	1.23185	1.00795	1.11058	1.11305
Snord43	ENSMUSG00000060036	1.10423	1.11384	1.12092	1.11297
Naa15	ENSMUSG00000063273	1.13836	1.01842	1.18784	1.11255
Ttc1	ENSMUSG00000041278	0.981785	1.15231	1.2171	1.11251
Gripap1	ENSMUSG00000031153	0.970745	1.13365	1.25031	1.11225
Ormdl2	ENSMUSG00000025353	0.928188	1.20697	1.22778	1.11212
Tada2a	ENSMUSG00000018651	1.11993	1.13405	1.08284	1.11206
Mpzl1	ENSMUSG00000026566	1.11196	1.21586	1.01677	1.1119
Bat1a	ENSMUSG00000019432	1.30712	1.13217	0.928627	1.11179
Fancg	ENSMUSG00000028453	1.13158	1.1994	1.01241	1.11174
AI316807	ENSMUSG00000031534	1.21133	1.18326	0.958047	1.1115
Snrnp35	ENSMUSG00000029402	1.12247	1.16611	1.04899	1.11146
Golga1	ENSMUSG00000026754	0.961897	1.10431	1.2926	1.11146
Nkiras1	ENSMUSG00000021772	1.18288	0.960106	1.20848	1.11131
Hnrpdl	ENSMUSG00000029328	1.23822	0.994319	1.11433	1.11117
Atg4d	ENSMUSG00000002820	0.956475	1.12342	1.27473	1.11057
Gpn1	ENSMUSG00000064037	1.15627	1.11394	1.06333	1.11053
Tex261	ENSMUSG00000014748	0.965993	1.26695	1.11891	1.11048
Coq10b	ENSMUSG00000025981	1.15658	1.24674	0.948972	1.1102
Zfp825	ENSMUSG00000069208	1.13813	0.986026	1.21893	1.11008
Rngtt	ENSMUSG00000028274	1.15532	1.05522	1.12165	1.10994
Ing5	ENSMUSG00000026283	1.13791	0.980051	1.22605	1.10991
Mfap1b	ENSMUSG00000048222	1.17771	1.13168	1.02581	1.10988
Plk4	ENSMUSG00000025758	1.06133	1.14743	1.12241	1.1098
Capza1	ENSMUSG00000070372	0.955633	1.19162	1.19988	1.10966
2210012G02Rik	ENSMUSG00000028619	1.11609	1.14534	1.06845	1.1095
Tmem66	ENSMUSG00000031532	1.00433	1.18025	1.15184	1.10938
Gnl3	ENSMUSG00000042354	1.26996	0.947168	1.1348	1.10929
Dnajc9	ENSMUSG00000021811	1.12692	1.02255	1.18429	1.10921
Tnfaip1	ENSMUSG00000017615	1.05949	1.16631	1.10439	1.10921
Ddx3x	ENSMUSG00000000787	1.2193	1.19827	0.933549	1.10901
Ngly1	ENSMUSG00000021785	1.03162	1.18322	1.11705	1.10889
Fam164a	ENSMUSG00000043542	1.11602	1.13396	1.07726	1.10883
Zscan12	ENSMUSG00000036721	1.20418	1.0058	1.12503	1.10864
Wdr19	ENSMUSG00000037890	0.916255	1.20293	1.23603	1.10857
Sdf4	ENSMUSG00000029076	1.12264	1.25802	0.964213	1.10841
Tm7sf3	ENSMUSG00000040234	0.980522	1.12675	1.2323	1.10832
Zfp941	ENSMUSG00000060314	1.30479	1.14329	0.912055	1.10808
mKIAA1019	ENSMUSG00000022961	1.18267	1.04217	1.10346	1.10795
Dph5	ENSMUSG00000033554	1.22064	1.00874	1.10307	1.10745
Lipe	ENSMUSG00000003123	1.02311	1.18137	1.12325	1.10729
Manea	ENSMUSG00000040520	1.13824	1.21731	0.979586	1.1072
Tnpo3	ENSMUSG00000012535	0.983207	1.17861	1.17051	1.10696
Lipo1	ENSMUSG00000024766	1.10565	1.15287	1.06262	1.10643
Kiaa0146	ENSMUSG00000041974	0.939946	1.13155	1.27324	1.10636
Appl1	ENSMUSG00000040760	0.923105	1.1714	1.25211	1.10628
Rhot1	ENSMUSG00000017686	1.00395	1.11439	1.20845	1.10576
Acacb	ENSMUSG00000042010	1.02759	1.1058	1.1882	1.10525
Cdk5rap1	ENSMUSG00000027487	1.2344	0.958966	1.13952	1.10491
Rint1	ENSMUSG00000028999	1.11624	1.13908	1.06077	1.10487
Phf3	ENSMUSG00000048874	1.13697	1.04988	1.12979	1.10483
Rfc1	ENSMUSG00000029191	1.04766	1.13184	1.13725	1.10481
Dcaf8	ENSMUSG00000026554	1.16044	1.14894	1.01128	1.10475
Galt	ENSMUSG00000036073	1.01571	1.17877	1.12606	1.10472
Slc25a13	ENSMUSG00000015112	0.954142	1.10164	1.28231	1.10463
AK046006	ENSMUSG00000005267	1.10689	1.0259	1.18518	1.10408
Pygb	ENSMUSG00000033059	0.934461	1.28409	1.12092	1.10385
Mybl2	ENSMUSG00000017861	1.12881	0.999596	1.19185	1.1038
Plagl1	ENSMUSG00000019817	1.23657	1.18193	0.919663	1.1036
Cdc73	ENSMUSG00000026361	1.13165	1.0129	1.17185	1.10336
Aurka	ENSMUSG00000027496	1.02506	1.14378	1.14539	1.10327
Avl9	ENSMUSG00000029787	1.12927	1.14332	1.03973	1.10314
Ddx58	ENSMUSG00000040296	1.13026	1.22669	0.967699	1.10294
Glod5	ENSMUSG00000031163	1.11677	1.13653	1.05624	1.10265
Tmx4	ENSMUSG00000034723	1.11291	1.1588	1.03723	1.10183
Abcd4	ENSMUSG00000021240	1.14162	1.05373	1.11143	1.10165
2310028O11Rik	ENSMUSG00000050608	0.934634	1.18159	1.20935	1.10125
AI597479	ENSMUSG00000010290	0.923685	1.13025	1.27918	1.10123
Sdhd	ENSMUSG00000000171	0.937645	1.1776	1.20937	1.1012
Rab2B	ENSMUSG00000022159	1.00611	1.19019	1.11446	1.10097
Zc3h10	ENSMUSG00000039810	1.14627	1.10474	1.05368	1.10091
n/a	ENSMUSG00000068262	1.10179	1.07657	1.12472	1.10085
Pigo	ENSMUSG00000028454	1.12722	0.986192	1.19955	1.10068
BC016423	ENSMUSG00000033799	0.991006	1.14154	1.17835	1.10056
Ddx59	ENSMUSG00000026404	1.1089	1.13998	1.05316	1.10009
1600027N09Rik	ENSMUSG00000027569	1.12844	1.10035	1.07203	1.10003
Fkbp14	ENSMUSG00000038074	0.974929	1.2148	1.1238	1.09999
Preb	ENSMUSG00000045302	1.007	1.15303	1.14608	1.09992
Mitf	ENSMUSG00000035158	0.963438	1.13248	1.21872	1.09965
Lime1	ENSMUSG00000027582	1.2322	1.12082	0.961106	1.099
Ndufs1	ENSMUSG00000025968	1.18038	0.982424	1.14215	1.0982
Kctd20	ENSMUSG00000005936	0.961837	1.25064	1.10017	1.09791
Arl5b	ENSMUSG00000017418	0.959619	1.15463	1.19407	1.0978
Zfx	ENSMUSG00000079509	1.25338	0.936651	1.12607	1.09751
2410016O06Rik	ENSMUSG00000046791	1.15266	1.00823	1.13696	1.09732
Abcb6	ENSMUSG00000026198	1.10101	1.16189	1.03174	1.09692
Exoc1	ENSMUSG00000036435	1.0384	1.14782	1.1072	1.09687
Arhgap11a	ENSMUSG00000041219	0.921925	1.16293	1.23072	1.09682
Importin9	ENSMUSG00000041879	1.06514	1.11646	1.10838	1.09643
Tnk2	ENSMUSG00000022791	1.11669	1.12385	1.04994	1.09632
Cul4b	ENSMUSG00000031095	0.996712	1.1621	1.13697	1.09611
Dnm1l	ENSMUSG00000022789	0.974122	1.20479	1.1217	1.09597
ubin	ENSMUSG00000008604	0.964291	1.13831	1.19875	1.0958
IKKbeta	ENSMUSG00000031537	1.11458	0.985285	1.19674	1.09536
Oaz2	ENSMUSG00000040652	0.961073	1.24	1.10158	1.09496
Wipf2	ENSMUSG00000038013	1.13827	0.970162	1.18872	1.09494
Zeb1	ENSMUSG00000024238	1.13798	1.23894	0.930685	1.09479
Zc3h14	ENSMUSG00000021012	0.950075	1.18458	1.16588	1.09478
Cnih	ENSMUSG00000015759	0.929881	1.14096	1.23611	1.09459
Exd2	ENSMUSG00000032705	1.09796	1.0944	1.0912	1.09452
Adamts10	ENSMUSG00000024299	1.26527	1.12833	0.917694	1.09422
Dr1	ENSMUSG00000029265	1.00192	1.12062	1.16667	1.09416
Nup153	ENSMUSG00000021374	1.17218	1.00346	1.11361	1.09415
Donson	ENSMUSG00000022960	1.10396	0.974549	1.21684	1.09395
Gtf2a1	ENSMUSG00000020962	1.11593	1.14222	1.0266	1.09378
Slc4a2	ENSMUSG00000028962	0.949912	1.22597	1.12329	1.09367
Exoc2	ENSMUSG00000021357	0.942901	1.19222	1.1625	1.0933
Zmym3	ENSMUSG00000031310	0.920146	1.13708	1.24807	1.09302
Atxn1l	ENSMUSG00000069895	1.10294	1.06229	1.11384	1.0928
Stap2	ENSMUSG00000038781	0.993589	1.16355	1.12525	1.09164
Rfwd2	ENSMUSG00000040782	0.985655	1.16212	1.13507	1.09144
Mrps2	ENSMUSG00000035772	0.993156	1.16588	1.12174	1.09108
1110002N22Rik	ENSMUSG00000046909	1.04902	1.11239	1.11094	1.09038
Txndc16	ENSMUSG00000021830	1.11857	1.19234	0.971592	1.09023
Hmgn1	ENSMUSG00000040681	0.95049	1.17712	1.15514	1.08927
Napg	ENSMUSG00000024581	1.0849	1.09892	1.0827	1.08882
Nprl2	ENSMUSG00000010057	0.947451	1.14409	1.19059	1.08874
wdp103	ENSMUSG00000032834	1.11369	1.03687	1.11583	1.08817
Dkc1	ENSMUSG00000031403	1.18417	0.968544	1.12282	1.08797
Dennd1a	ENSMUSG00000035392	0.973087	1.10405	1.19852	1.08792
Prpf38a	ENSMUSG00000063800	1.10259	1.03089	1.1324	1.08779
Wapal	ENSMUSG00000041408	1.04646	1.1117	1.10538	1.08744
Trim26	ENSMUSG00000024457	1.16636	1.10702	0.995106	1.08714
Mmgt1	ENSMUSG00000061273	1.18211	0.936907	1.15984	1.08705
Tti1	ENSMUSG00000027650	1.01939	1.13542	1.10943	1.08692
Eif2c1	ENSMUSG00000041530	1.0394	1.11885	1.10403	1.08687
Gar1	ENSMUSG00000028010	1.14169	0.99236	1.1328	1.08673
Ccdc132	ENSMUSG00000001376	1.10445	1.10303	1.0535	1.08673
D15Ertd621e	ENSMUSG00000037119	1.01761	1.13127	1.11461	1.08665
Rbl2	ENSMUSG00000031666	0.977267	1.14208	1.14516	1.08524
Chchd8	ENSMUSG00000044881	0.941601	1.11964	1.21158	1.08501
Sh3bp5l	ENSMUSG00000013646	0.937439	1.12258	1.21268	1.08468
Hip1r	ENSMUSG00000000915	1.1731	1.12492	0.967014	1.08467
Qrich1	ENSMUSG00000006673	1.17278	1.14022	0.95318	1.08424
Sh2d5	ENSMUSG00000045349	1.15466	0.996942	1.107	1.08416
Cul9	ENSMUSG00000040327	1.14537	1.18746	0.934735	1.08331
2310003C23Rik	ENSMUSG00000027573	1.11863	1.17953	0.963115	1.08316
Isca1	ENSMUSG00000044792	0.98834	1.13096	1.13667	1.08309
Taf2	ENSMUSG00000037343	1.09157	1.09018	1.06722	1.08293
Yy1	ENSMUSG00000021264	1.14039	1.11094	1.0023	1.08288
Picalm	ENSMUSG00000039361	1.1145	1.11366	1.02147	1.08231
Slc38a6	ENSMUSG00000044712	0.930287	1.22376	1.11106	1.08147
Srp54a	ENSMUSG00000079108	0.915539	1.19171	1.15712	1.08079
Ints3	ENSMUSG00000027933	1.12197	1.11859	1.00453	1.08028
Dnajc18	ENSMUSG00000024350	1.12798	1.16066	0.962642	1.08017
Zfp13	ENSMUSG00000062012	1.09757	1.09271	1.04927	1.07963
Ankrd26	ENSMUSG00000007827	1.19328	0.941866	1.11915	1.07946
Aptx	ENSMUSG00000028411	1.19364	1.11742	0.942254	1.07916
Cenpe	ENSMUSG00000045328	0.923199	1.14583	1.18789	1.07911
Rfc5	ENSMUSG00000029363	0.931491	1.11295	1.21071	1.0787
Ccdc125	ENSMUSG00000048924	1.12768	1.11191	1.00019	1.0784
Derl1	ENSMUSG00000022365	0.939787	1.20499	1.10525	1.07768
Yme1l1	ENSMUSG00000026775	0.914335	1.17777	1.16057	1.07715
Nipa2	ENSMUSG00000030452	1.05186	1.09481	1.0847	1.07696
mKIAA1745	ENSMUSG00000030539	0.98527	1.13754	1.11427	1.07689
Gtsf1l	ENSMUSG00000070708	1.11599	0.938679	1.192	1.07684
Exosc9	ENSMUSG00000027714	0.95417	1.13313	1.15296	1.07623
Imp4	ENSMUSG00000026127	1.11505	1.12927	0.989524	1.07607
AK161900	ENSMUSG00000011958	1.08316	1.09619	1.04831	1.0757
Apbb1	ENSMUSG00000037032	0.937461	1.10559	1.20063	1.07561
Rad54b	ENSMUSG00000078773	1.11381	0.913928	1.22243	1.07559
Ttll12	ENSMUSG00000016757	0.952791	1.14844	1.1369	1.0755
Eif1	ENSMUSG00000035530	1.06541	1.06765	1.09302	1.07529
4930420K17Rik	ENSMUSG00000079659	1.11946	0.955205	1.16153	1.07493
Paqr8	ENSMUSG00000025931	1.05437	1.07399	1.09396	1.07399
Tmem57	ENSMUSG00000028826	1.20435	0.924712	1.11194	1.07386
Gbas	ENSMUSG00000029432	0.927665	1.14984	1.1599	1.07354
Pgrmc2	ENSMUSG00000049940	1.08169	1.05651	1.08228	1.07343
Dnajc7	ENSMUSG00000014195	0.978573	1.14437	1.10256	1.07281
Coq2	ENSMUSG00000029319	1.0882	1.08548	1.04403	1.07238
2610301G19Rik	ENSMUSG00000033712	0.953188	1.1177	1.1561	1.07193
BC030867	ENSMUSG00000034773	1.11571	0.942659	1.16853	1.07114
Rbm3	ENSMUSG00000031167	0.94222	1.16727	1.11699	1.071
Bfar	ENSMUSG00000022684	0.946805	1.12011	1.15802	1.07089
Rnf215	ENSMUSG00000003581	1.06008	1.08072	1.06895	1.06988
Tmem70	ENSMUSG00000025940	1.12874	0.931191	1.16439	1.06966
Phactr4	ENSMUSG00000066043	1.12844	0.930996	1.16282	1.069
Eml4	ENSMUSG00000032624	0.934838	1.10009	1.18646	1.06857
Polr1a	ENSMUSG00000049553	1.07642	1.03847	1.09075	1.06832
Hmox1	ENSMUSG00000005413	1.03978	1.08752	1.07638	1.06769
Obfc2a	ENSMUSG00000026107	0.916078	1.18237	1.12214	1.06719
Tbc1d19	ENSMUSG00000039178	1.09583	1.09819	1.00975	1.06711
Nubp2	ENSMUSG00000039183	1.09197	1.07638	1.03381	1.0671
Rpp14	ENSMUSG00000023156	1.13971	0.954599	1.11184	1.0655
Mtmr2	ENSMUSG00000031918	1.0414	1.07312	1.08194	1.06534
Dnajc13	ENSMUSG00000032560	0.971593	1.11056	1.11993	1.06514
Suv420h2	ENSMUSG00000059851	1.06116	1.03483	1.09632	1.0638
Pigu	ENSMUSG00000038383	1.15651	0.940911	1.10557	1.06356
Ing3	ENSMUSG00000029670	1.11442	0.94684	1.14015	1.06356
Atxn7l3	ENSMUSG00000059995	1.08531	1.06714	1.03695	1.06294
Srp54a	ENSMUSG00000021020	0.916499	1.17013	1.11864	1.06256
Arpc5l	ENSMUSG00000026755	1.0189	1.09058	1.07721	1.06177
Bivm	ENSMUSG00000041684	0.912437	1.10768	1.18301	1.06137
Pdha1	ENSMUSG00000031299	0.910378	1.10474	1.18676	1.06075
Smc3	ENSMUSG00000024974	1.04705	1.03958	1.09618	1.06065
Ssna1	ENSMUSG00000026966	0.93853	1.15447	1.10003	1.06026
Ctsf	ENSMUSG00000083282	1.08359	1.0135	1.08529	1.06025
Psmd11	ENSMUSG00000017428	0.969543	1.11486	1.10214	1.06009
C80913	ENSMUSG00000030421	0.922512	1.16678	1.10441	1.05933
Tbk1	ENSMUSG00000020115	1.04923	1.0542	1.07273	1.05867
Kndc1	ENSMUSG00000066129	1.06192	1.09048	1.024	1.05845
Nampt	ENSMUSG00000020572	0.911547	1.13064	1.15025	1.05836
Surf1	ENSMUSG00000015790	0.925628	1.11512	1.14539	1.0574
Pef1	ENSMUSG00000028779	1.02143	1.05172	1.09801	1.05658
Tbck	ENSMUSG00000028030	1.05967	1.06998	1.0388	1.05607
2700078E11Rik	ENSMUSG00000033417	1.04866	1.08083	1.03894	1.05599
Ints7	ENSMUSG00000037461	1.12616	0.937509	1.11442	1.0557
Cdc42bpg	ENSMUSG00000024769	1.09149	0.981477	1.09786	1.05556
Dhx33	ENSMUSG00000040620	1.01338	1.08452	1.06935	1.0553
AK160359	ENSMUSG00000023286	1.08093	1.04951	1.03536	1.0551
Kif4	ENSMUSG00000034311	1.00344	1.07875	1.08506	1.05509
Tmem189	ENSMUSG00000090213	1.07871	0.992684	1.09664	1.05502
Tgds	ENSMUSG00000022130	1.11346	0.936608	1.12589	1.05498
Peo1	ENSMUSG00000025209	1.07304	1.07676	1.016	1.0549
Mark3	ENSMUSG00000007411	1.06231	1.09769	1.00436	1.05408
Aasdhppt	ENSMUSG00000025894	1.04799	1.06138	1.05274	1.05402
Pdpk1	ENSMUSG00000024122	0.93588	1.11338	1.12303	1.05378
BC005561	ENSMUSG00000037475	1.05807	1.05903	1.04253	1.05319
Gtf2ird1	ENSMUSG00000023079	1.09815	1.00578	1.05736	1.05308
Nasp	ENSMUSG00000028693	1.03457	1.03612	1.08742	1.05242
Dnm2	ENSMUSG00000033335	1.06966	1.04795	1.03966	1.05235
Kdelc1	ENSMUSG00000026047	1.0768	0.987613	1.09575	1.05231
Nrf1	ENSMUSG00000058440	1.06012	1.01544	1.08217	1.05221
Elmod3	ENSMUSG00000056698	0.993846	1.07053	1.09414	1.05195
Ube2d2	ENSMUSG00000091896	1.04962	1.07957	1.02675	1.05176
Derp6	ENSMUSG00000018565	1.00405	1.07628	1.07607	1.05158
Hsd17b12	ENSMUSG00000027195	1.04153	1.08174	1.03201	1.05154
Caprin1	ENSMUSG00000027184	1.09942	1.04298	1.01285	1.05114
Dag1	ENSMUSG00000039952	1.04809	1.01466	1.0906	1.05066
Rraga	ENSMUSG00000070934	1.09946	1.09032	0.96702	1.05048
Clock	ENSMUSG00000029238	1.00975	1.07814	1.06452	1.05038
0610011L14Rik	ENSMUSG00000027628	0.984223	1.09055	1.07899	1.05015
Arfgap1	ENSMUSG00000027575	1.11622	1.12271	0.922697	1.0496
Pptc7	ENSMUSG00000038582	1.08241	1.02313	1.04098	1.04855
Eif4b	ENSMUSG00000058655	1.09479	1.0045	1.04631	1.04789
Klf9	ENSMUSG00000033863	0.910957	1.11428	1.13306	1.04773
Cand1	ENSMUSG00000020114	0.982735	1.07377	1.08698	1.04678
Oxsr1	ENSMUSG00000036737	1.0012	1.04336	1.09665	1.04635
Bcas2	ENSMUSG00000005687	0.992708	1.08054	1.06561	1.04557
mKIAA1524	ENSMUSG00000033031	0.995576	1.06111	1.07797	1.04427
Psmd9	ENSMUSG00000029440	0.979071	1.07095	1.0832	1.04335
Zscan21	ENSMUSG00000037017	1.03278	1.05832	1.03851	1.04315
Trim27	ENSMUSG00000021326	1.08713	0.977745	1.06758	1.04305
Golph3	ENSMUSG00000022200	1.07682	1.06846	0.985917	1.04291
Slc35a3	ENSMUSG00000027957	0.996727	1.04093	1.09318	1.04287
Magi3	ENSMUSG00000052539	1.10302	0.92463	1.11173	1.04276
Fastk	ENSMUSG00000028959	0.996832	1.09197	1.04133	1.04265
Chd1	ENSMUSG00000023852	1.05644	0.986074	1.0858	1.04192
Drg2	ENSMUSG00000020537	1.06065	0.998677	1.06753	1.04182
2310037I24Rik	ENSMUSG00000022992	1.06989	1.06718	0.98817	1.04105
Mesdc2	ENSMUSG00000038503	0.975911	1.06882	1.08111	1.04087
Ercc3	ENSMUSG00000024382	0.962673	1.07361	1.09047	1.04067
Tmpo	ENSMUSG00000019961	1.07504	0.968108	1.08278	1.04063
Fam135a	ENSMUSG00000026153	1.03743	0.990422	1.09664	1.04059
Cdc40	ENSMUSG00000038446	1.05568	0.995455	1.0722	1.04058
Per1	ENSMUSG00000020893	1.04232	1.00552	1.07408	1.04026
Aftph	ENSMUSG00000049659	1.06288	1.00516	1.05357	1.04023
Fbxo38	ENSMUSG00000042211	1.09836	1.01077	1.01361	1.04013
Psenen	ENSMUSG00000036835	0.948564	1.09695	1.08018	1.03972
Swap70	ENSMUSG00000031015	1.09165	1.04227	0.984786	1.03865
Ctu1	ENSMUSG00000038888	1.05705	0.967491	1.09459	1.03832
Nid2	ENSMUSG00000021806	0.959982	1.06933	1.08931	1.03795
Zfp236	ENSMUSG00000041258	1.04652	1.05069	1.01651	1.0378
Vps4a	ENSMUSG00000031913	1.01532	1.01772	1.07969	1.03716
Ppp4r2	ENSMUSG00000052144	1.08345	0.972593	1.05812	1.03695
Ctps	ENSMUSG00000028633	1.04861	0.981085	1.08301	1.03669
Ube2f	ENSMUSG00000034343	1.0117	1.02378	1.07506	1.03648
Pcmtd2	ENSMUSG00000027589	0.98956	1.06083	1.06024	1.03633
Ikbkap	ENSMUSG00000028431	0.96307	1.06758	1.07977	1.03545
Cpsf3l	ENSMUSG00000029034	1.0417	1.03815	1.0261	1.03529
Gpbp1l1	ENSMUSG00000034042	1.08458	1.01191	1.01106	1.03528
Fam60a	ENSMUSG00000039985	1.06462	1.07367	0.969375	1.03479
Parn	ENSMUSG00000022685	1.03914	1.05065	1.01435	1.0346
Tsga14	ENSMUSG00000029790	1.09974	1.07868	0.931712	1.03392
Slain2	ENSMUSG00000036087	1.04247	1.02014	1.039	1.03382
Khdrbs1	ENSMUSG00000028790	1.08136	0.959709	1.0646	1.03379
Brd9	ENSMUSG00000057649	1.09882	1.02859	0.977086	1.03363
Nagpa	ENSMUSG00000023143	1.08191	0.972496	1.04912	1.03348
Ranbp2	ENSMUSG00000003226	0.973103	1.03763	1.09271	1.03332
Dlg3	ENSMUSG00000000881	1.06513	1.03046	1.00438	1.03302
U2af1	ENSMUSG00000061613	1.04539	0.998547	1.0556	1.03288
Hnrnpul2	ENSMUSG00000071659	0.938565	1.08244	1.08421	1.03275
Osbpl1a	ENSMUSG00000044252	1.03927	1.02063	1.03749	1.03243
Fermt2	ENSMUSG00000037712	1.07422	1.06094	0.964066	1.03188
Nr1d2	ENSMUSG00000021775	1.07016	0.98242	1.0445	1.03169
Bcs1l	ENSMUSG00000026172	0.914557	1.09545	1.09357	1.0309
A930013F10Rik	ENSMUSG00000031536	1.09944	0.931424	1.06832	1.0304
4933407C03Rik	ENSMUSG00000034390	0.995049	1.0248	1.0728	1.03039
Tmbim1	ENSMUSG00000006301	0.992216	1.04758	1.05213	1.03028
Uvrag	ENSMUSG00000035354	1.00453	1.01841	1.06829	1.03005
Atg2b	ENSMUSG00000041341	1.04887	0.984398	1.05681	1.02951
Morc2a	ENSMUSG00000034543	1.06565	1.01923	1.00357	1.02915
Kcmf1	ENSMUSG00000055239	1.05669	1.02772	1.00365	1.02912
Cmas	ENSMUSG00000030282	0.996813	1.05846	1.03115	1.0285
Rock1	ENSMUSG00000024290	0.980318	1.04422	1.0626	1.02844
Sephs1	ENSMUSG00000026662	1.01213	1.04665	1.02662	1.02837
5930416I19Rik	ENSMUSG00000048668	0.937917	1.08157	1.07121	1.02809
Ccndbp1	ENSMUSG00000023572	1.01767	1.03928	1.02412	1.02699
Tpp2	ENSMUSG00000041763	1.06515	0.969398	1.04866	1.02687
Pard6a	ENSMUSG00000005699	1.07425	0.926403	1.08755	1.02672
Csrp2	ENSMUSG00000020186	0.942155	1.05464	1.08834	1.02643
4930402H24Rik	ENSMUSG00000027309	1.05079	1.05606	0.974142	1.0263
Gdap2	ENSMUSG00000027865	1.01538	1.06987	0.994261	1.02602
Slc26a11	ENSMUSG00000039908	1.07164	1.09345	0.921413	1.02589
Tmco1	ENSMUSG00000052428	1.03708	0.992554	1.04753	1.02544
Wbp4	ENSMUSG00000022023	1.02234	0.988216	1.06665	1.02523
EF437385	ENSMUSG00000049647	0.949068	1.05841	1.07231	1.02508
Lass5	ENSMUSG00000023021	1.01091	1.07117	0.992364	1.02427
Dgkq	ENSMUSG00000004815	1.03917	0.974994	1.06053	1.02425
0610007L01Rik	ENSMUSG00000053094	0.967328	1.07397	1.03409	1.02418
Anapc1	ENSMUSG00000014355	0.991542	1.08387	0.999604	1.02417
Tmem51	ENSMUSG00000040616	1.08005	0.977083	1.01794	1.02416
Lmf2	ENSMUSG00000022614	1.0559	1.06703	0.952655	1.02387
BC046331	ENSMUSG00000039523	0.970627	1.02101	1.08196	1.02353
Ubp1	ENSMUSG00000009741	0.986736	1.04303	1.04121	1.02332
Mrpl10	ENSMUSG00000001445	0.968553	1.08471	1.01869	1.02288
Arhgap42	ENSMUSG00000050730	1.00008	1.09937	0.9733	1.02284
Prpsap2	ENSMUSG00000020528	1.03469	1.04321	0.990727	1.02262
D10Wsu52e	ENSMUSG00000001783	0.946888	1.08755	1.03833	1.02257
Cbara1	ENSMUSG00000020111	1.0143	1.08491	0.96931	1.02174
Clint1	ENSMUSG00000006169	0.957184	1.07709	1.03453	1.02171
Hnrpk	ENSMUSG00000021546	0.917106	1.07233	1.08384	1.0215
Nek8	ENSMUSG00000017405	0.955663	1.06962	1.04259	1.02145
Eif2b2	ENSMUSG00000004788	1.02576	1.08045	0.961164	1.02129
Hnrnph2	ENSMUSG00000045427	1.08311	0.976511	1.00685	1.02119
Ankrd17	ENSMUSG00000055204	1.08277	1.00251	0.979811	1.02076
Lmnb2	ENSMUSG00000062075	1.05674	0.994962	1.01139	1.0207
raptor	ENSMUSG00000025583	1.02928	1.00572	1.02605	1.02029
Fiz1	ENSMUSG00000061374	1.07169	0.982023	1.00912	1.02026
Rnf20	ENSMUSG00000028309	1.09614	1.04217	0.929226	1.0201
Actr8	ENSMUSG00000015971	0.936251	1.04263	1.0862	1.01971
n/a	ENSMUSG00000091609	1.04551	1.0377	0.976668	1.01949
Parg	ENSMUSG00000021911	1.0775	0.93174	1.05514	1.01939
Uqcrb	ENSMUSG00000021520	0.940233	1.02664	1.09716	1.01931
Cab39	ENSMUSG00000036707	1.04714	1.06118	0.952383	1.01907
N6amt1	ENSMUSG00000044442	1.09246	0.95183	1.01706	1.01883
Utp11l	ENSMUSG00000028907	1.01713	1.01093	1.02752	1.0185
Dcaf6	ENSMUSG00000026571	1.05706	1.08008	0.925317	1.01847
Sys1	ENSMUSG00000045503	0.990621	1.04809	1.01741	1.01844
Tbc1d1	ENSMUSG00000029174	1.01159	0.950337	1.09644	1.0177
Ube3b	ENSMUSG00000029577	0.913423	1.06187	1.08557	1.01734
1600014C10Rik	ENSMUSG00000054676	1.00376	0.990394	1.05869	1.01719
Abcf3	ENSMUSG00000003234	1.01868	1.01655	1.01512	1.01678
Galnt10	ENSMUSG00000020520	1.08272	1.02623	0.944768	1.01632
Cxxc1	ENSMUSG00000024560	0.989093	1.03462	1.02544	1.01619
Zkscan1	ENSMUSG00000029729	1.00179	1.04763	0.998972	1.01589
Rfc2	ENSMUSG00000023104	1.0151	1.04709	0.986155	1.01581
Arf1	ENSMUSG00000048076	0.932613	1.02675	1.09462	1.01581
Snx17	ENSMUSG00000029146	0.970934	1.07227	1.00667	1.01577
Insl3	ENSMUSG00000031805	0.929615	1.04614	1.07762	1.01575
Pygo2	ENSMUSG00000047824	0.958997	1.02333	1.0676	1.01566
Ppp5c	ENSMUSG00000003099	1.04079	1.03086	0.976161	1.01553
Med17	ENSMUSG00000031935	1.0257	0.959556	1.06389	1.01546
Nono	ENSMUSG00000031311	0.934119	1.02944	1.08645	1.0147
Nup98	ENSMUSG00000063550	1.03249	0.95957	1.05403	1.01454
Pola2	ENSMUSG00000024833	1.00492	1.00781	1.02889	1.01382
Atp5b	ENSMUSG00000025393	0.920899	1.05525	1.07195	1.01371
Synj1	ENSMUSG00000022973	1.07395	0.93318	1.03916	1.01363
Pik3r4	ENSMUSG00000032571	0.989073	1.0333	1.01848	1.01345
Golga4	ENSMUSG00000038708	1.03619	1.05777	0.949291	1.01331
Gtf2ird2	ENSMUSG00000015942	1.03619	1.02343	0.979755	1.01284
Mrpl46	ENSMUSG00000030612	1.05487	0.977392	1.00764	1.0128
Tgif1	ENSMUSG00000047407	0.961599	1.05951	1.01859	1.01243
Rhot2	ENSMUSG00000025733	1.03016	1.05114	0.957909	1.01227
Tial1	ENSMUSG00000030846	1.00799	0.936304	1.09832	1.01205
Rab7	ENSMUSG00000079477	0.975237	1.09652	0.969195	1.012
9430015G10Rik	ENSMUSG00000059939	1.06054	1.04814	0.932314	1.01198
Psmc3ip	ENSMUSG00000019303	1.05073	0.953884	1.03365	1.01186
Tardbp	ENSMUSG00000041459	0.924007	1.08645	1.03028	1.0113
Dstn	ENSMUSG00000015932	0.947022	1.07598	1.01488	1.01125
Wdr77	ENSMUSG00000000561	1.08608	0.966811	0.983989	1.01095
Polr1d	ENSMUSG00000029642	1.00818	0.989023	1.03621	1.01095
Raly	ENSMUSG00000027593	0.932955	1.02466	1.07974	1.01062
Nsun2	ENSMUSG00000021595	1.01395	0.977704	1.04062	1.01043
Snx12	ENSMUSG00000046032	0.942561	1.00255	1.09165	1.01042
Fkbp15	ENSMUSG00000066151	1.08905	1.00346	0.943791	1.01036
AK162806	ENSMUSG00000024054	1.00165	0.972861	1.05827	1.01031
Ung	ENSMUSG00000029591	1.07826	0.972865	0.982901	1.01025
Msh6	ENSMUSG00000005370	0.954085	1.00996	1.06948	1.01008
E2f6	ENSMUSG00000057469	0.924357	1.09054	1.02198	1.00997
Vdac2	ENSMUSG00000021771	0.938686	1.03506	1.05895	1.00953
[truncated: 2,523 more rows]

## Sheet: Consistent isoforms
Consistently behaving isoforms (1.1-fold threshold)
Gene Name	Gene	Isoform	v6.5 CHX/v6.5	Upf1-1/GFP	Upf1-2/GFP	Geometric mean
Xrcc6	ENSMUSG00000022471	ENSMUST00000069530	1.49499	46.9272	3.03622	5.97216
Srsf5	ENSMUSG00000021134	uc007obq.1	10.4047	2.5941	3.22242	4.43064
Cdkn2aip	ENSMUSG00000038069	uc009lri.1	3.54602	5.51665	3.31023	4.01567
2610305D13Rik	ENSMUSG00000066000	ENSMUST00000105726	2.01407	5.3418	3.48597	3.3473
Smoc1	ENSMUSG00000021136	ENSMUST00000021564	2.20379	3.33105	4.9989	3.32309
Tbx3	ENSMUSG00000018604	ENSMUST00000018748	1.86584	4.74112	4.12579	3.31707
Tm9sf4	ENSMUSG00000068040	ENSMUST00000089027	7.13646	0.985152	5.03383	3.28318
Clk4	ENSMUSG00000020385	uc007itt.1	8.75639	2.12663	1.89423	3.27957
Gorab	ENSMUSG00000040124	uc007dhn.1	6.38856	2.85313	1.80809	3.20613
Gnl3	ENSMUSG00000042354	uc007swj.1	7.70178	1.74083	2.28283	3.12805
Setd6	ENSMUSG00000031671	uc009myx.1	5.44518	2.09959	2.48838	3.05273
Rnf25	ENSMUSG00000026171	ENSMUST00000128491	4.88543	2.23048	2.56683	3.03552
Pnma5	ENSMUSG00000050424	ENSMUST00000114540	2.30099	3.66245	3.30513	3.03127
AK134636	ENSMUSG00000087153	ENSMUST00000127799	3.48367	2.79281	2.75012	2.99096
Atp5d	ENSMUSG00000003072	ENSMUST00000105366	3.20573	4.34908	1.90041	2.9812
Ptbp2	ENSMUSG00000028134	ENSMUST00000029780:poison1	7.82818	2.76476	1.09835	2.87532
Hnrnpc	ENSMUSG00000060373	uc007toh.1	9.56608	1.68418	1.39223	2.82018
Uqcrc2	ENSMUSG00000030884	uc009jms.1	4.66942	2.18121	2.19129	2.81549
Bex1	ENSMUSG00000050071	ENSMUST00000113120	2.25329	3.08664	3.17705	2.80614
Cirbp	ENSMUSG00000045193	ENSMUST00000054666	6.659	2.70169	1.22629	2.80465
Prpf38b	ENSMUSG00000027881	ENSMUST00000129273	4.93297	2.11108	2.11842	2.80463
Rsrc2	ENSMUSG00000029422	ENSMUST00000057795	5.33507	2.10749	1.9313	2.78988
Gm13139	ENSMUSG00000067916	ENSMUST00000084149	2.42255	3.43735	2.53405	2.76336
Snrpa1	ENSMUSG00000030512	ENSMUST00000032723	1.96993	3.07232	3.44202	2.75155
4933421E11Rik	ENSMUSG00000056260	uc008qwh.1	0.913472	5.73249	3.95207	2.7455
mKIAA1376	ENSMUSG00000074794	uc007rhj.1	7.29966	1.87792	1.50484	2.74257
BC043476	ENSMUSG00000061544	uc008arg.1	2.14641	4.22748	2.24758	2.73214
Bcar1	ENSMUSG00000031955	ENSMUST00000166232	1.1681	4.02508	4.09581	2.68039
Prr11	ENSMUSG00000020493	ENSMUST00000051395	1.63077	3.07729	3.73379	2.65605
Yipf3	ENSMUSG00000071074	ENSMUST00000151488	6.51276	1.88354	1.51058	2.64623
Opa1	ENSMUSG00000038084	ENSMUST00000068650	1.94331	3.69799	2.57131	2.64375
Spop	ENSMUSG00000057522	ENSMUST00000107724	0.912301	4.49551	4.16094	2.57456
Zfp346	ENSMUSG00000021481	uc007qpy.1	1.96474	2.48305	3.42978	2.55772
Phkg2	ENSMUSG00000030815	ENSMUST00000146383	4.61432	2.15797	1.63271	2.53331
AK134636	ENSMUSG00000087153	ENSMUST00000153710	4.71285	2.17197	1.58213	2.53003
Lime1	ENSMUSG00000027582	ENSMUST00000116366	4.94469	2.30838	1.40841	2.52382
Rinl	ENSMUSG00000051735	uc009fzy.1	1.34087	3.96105	3.02097	2.52221
Clk2	ENSMUSG00000068917	ENSMUST00000128318	7.32485	1.50749	1.40149	2.492
Atxn7l3	ENSMUSG00000059995	ENSMUST00000107134	0.910006	3.28647	4.87443	2.44286
Gm13138	ENSMUSG00000078499	uc008vsi.2	1.73094	3.90335	2.14056	2.4364
Ensa	ENSMUSG00000038619	uc008qkk.1	1.14542	2.91016	4.32711	2.43422
5330429B09Rik	ENSMUSG00000071796	uc009law.1	5.75374	1.71552	1.44088	2.42284
Gtpbp3	ENSMUSG00000007610	ENSMUST00000007754	1.84583	2.31573	3.09017	2.36385
Gadd45g	ENSMUSG00000021453	ENSMUST00000021903	5.47216	1.63689	1.46388	2.3581
Rabggtb	ENSMUSG00000038975	ENSMUST00000089950	4.23733	1.63868	1.86532	2.34844
Spen	ENSMUSG00000040761	ENSMUST00000078886	2.42655	4.14469	1.27117	2.33827
9930104L06Rik	ENSMUSG00000044730	uc008url.1	2.20861	3.05473	1.86484	2.32583
Tsc1	ENSMUSG00000026812	ENSMUST00000028155	2.41731	2.19935	2.2953	2.30226
Rdm1	ENSMUSG00000010362	ENSMUST00000010506	1.77984	2.77403	2.45711	2.29776
Usp7	ENSMUSG00000022710	ENSMUST00000160326	2.51546	1.5423	3.11508	2.29484
Hps5	ENSMUSG00000014418	ENSMUST00000107654	3.51882	1.51994	2.25781	2.29423
Caper	ENSMUSG00000027620	ENSMUST00000146297	2.77628	1.99203	2.16463	2.2876
Srsf4	ENSMUSG00000028911	ENSMUSG00000028911:poison1	6.80467	1.41807	1.23135	2.28189
Mybl2	ENSMUSG00000017861	ENSMUST00000018005	9.3233	1.02649	1.22525	2.27186
Fbxo22	ENSMUSG00000032309	ENSMUST00000140375	1.84468	2.3016	2.72711	2.26231
0610007P22Rik	ENSMUSG00000015126	ENSMUST00000015270	2.0464	2.9661	1.89662	2.25797
Pum1	ENSMUSG00000028580	uc008uzn.1	0.96008	3.2693	3.66609	2.25764
Bcl7b	ENSMUSG00000029681	uc008zxw.1	2.11338	2.7765	1.93366	2.24708
Dpcd	ENSMUSG00000041035	uc008hre.1	2.45994	2.08148	2.2083	2.24449
Ankrd10	ENSMUSG00000031508	uc009kvp.1	4.44019	1.77888	1.41064	2.23351
Myl12b	ENSMUSG00000034868	ENSMUST00000131820	2.92508	1.81028	2.03093	2.20729
Ppcs	ENSMUSG00000028636	ENSMUST00000030385	3.45174	1.07924	2.88372	2.20649
Triap1	ENSMUSG00000029535	ENSMUST00000031508	2.28576	1.74949	2.66828	2.20153
Ss18	ENSMUSG00000037013	ENSMUST00000076544	2.44107	2.33354	1.8542	2.19407
Gtf3c4	ENSMUSG00000035666	ENSMUST00000156468	3.02345	2.16014	1.59327	2.18319
2610305D13Rik	ENSMUSG00000066000	uc008vta.1	1.19257	2.92896	2.95714	2.17783
Brd2	ENSMUSG00000024335	uc008cbh.1	6.79237	1.51083	1.00316	2.17538
Gm13139	ENSMUSG00000067916	uc008vsn.1	1.35412	3.02437	2.49975	2.17135
Gadd45b	ENSMUSG00000015312	ENSMUST00000015456	4.29976	2.09389	1.13679	2.17117
Atf2	ENSMUSG00000027104	ENSMUST00000055833	0.913366	3.21041	3.39629	2.15148
Max	ENSMUSG00000059436	uc007nyv.1	1.61198	2.24769	2.69442	2.13724
Zfp534	ENSMUSG00000062518	ENSMUST00000117638	2.2232	2.26519	1.93566	2.13618
Tecr	ENSMUSG00000031708	uc009mkl.1	1.3895	2.01202	3.47153	2.13306
Spopl	ENSMUSG00000026771	ENSMUST00000028110	2.25529	3.09303	1.39118	2.13299
Srsf10	ENSMUSG00000028676	ENSMUST00000030438	1.95088	1.83508	2.66432	2.12076
Dnmt3l	ENSMUSG00000000730	ENSMUST00000151242	1.04206	2.93286	3.08853	2.11339
Ptbp1	ENSMUSG00000006498	ENSMUST00000169726	1.29661	2.57274	2.82864	2.11314
Ilf3	ENSMUSG00000032178	uc009olb.1	2.34889	1.68033	2.38782	2.11229
AK010804	ENSMUSG00000074832	uc007qzq.1	1.40542	2.68642	2.47252	2.10559
Xpc	ENSMUSG00000030094	uc009cyd.1	1.28199	4.04613	1.78158	2.09851
Net1	ENSMUSG00000021215	uc007pjd.1	2.25422	1.84611	2.21308	2.09612
1500001M20Rik	ENSMUSG00000030316	ENSMUST00000154621	2.09417	1.69617	2.57903	2.09241
AK076954	ENSMUSG00000036054	uc009lzl.1-uc009lzo.1	4.74025	1.24917	1.53939	2.08893
D11Wsu47e	ENSMUSG00000041623	uc007mev.1	1.54289	6.36438	0.924933	2.08641
Napb	ENSMUSG00000027438	ENSMUST00000136513	3.93591	1.96921	1.16177	2.08043
Nudt1	ENSMUSG00000036639	ENSMUST00000050205	0.938803	4.42863	2.15793	2.07791
Rps21	ENSMUSG00000039001	uc008ois.1	1.37961	2.09062	3.09737	2.07495
Zfp819	ENSMUSG00000055102	ENSMUST00000120935	7.17447	0.996061	1.23818	2.06833
Zmynd8	ENSMUSG00000039671	uc008nyf.1	2.6779	2.80486	1.16622	2.0614
Gabbr1	ENSMUSG00000024462	uc008cmb.1	2.65495	1.65093	1.9947	2.06009
Patl1	ENSMUSG00000046139	uc008gti.1	5.57156	1.09967	1.41046	2.05211
Rpsa	ENSMUSG00000032518	uc009sce.1	2.82761	2.08963	1.46149	2.05161
Camsap1	ENSMUSG00000026933	ENSMUST00000091268	1.54202	2.6901	2.05153	2.04164
Gjc1	ENSMUSG00000034520	ENSMUST00000092567	4.81332	1.12103	1.56339	2.03568
Gm13051	ENSMUSG00000066009	ENSMUST00000105728	2.64542	2.28147	1.37535	2.02476
Cpsf7	ENSMUSG00000034820	ENSMUST00000038379	2.60393	1.35525	2.33337	2.01935
Tnip2	ENSMUSG00000059866	ENSMUST00000087737	1.71254	1.33304	3.57736	2.0138
Ccnt2	ENSMUSG00000026349	ENSMUST00000143513	4.162	1.42134	1.37658	2.01187
D15Ertd621e	ENSMUSG00000037119	ENSMUST00000037270	1.0837	2.00062	3.75588	2.01184
Dpy30	ENSMUSG00000024067	uc008dnw.1	1.1521	2.65407	2.64995	2.00854
Ilf3	ENSMUSG00000032178	uc009olg.1	3.53286	1.45418	1.56563	2.0036
G3bp2	ENSMUSG00000029405	ENSMUST00000169094	1.36256	2.72148	2.16596	2.00265
Acp6	ENSMUSG00000028093	ENSMUST00000126438	1.73108	1.65726	2.78519	1.99919
Smcr7l	ENSMUSG00000022412	uc007wvj.1	2.64738	2.19826	1.37246	1.99894
Hmmr	ENSMUSG00000020330	uc007ilu.1	2.78591	1.78632	1.59034	1.99284
Rpe	ENSMUSG00000026005	uc007bik.1	4.28661	1.20327	1.51362	1.9838
Hmga1	ENSMUSG00000046711	ENSMUST00000117600	0.952525	5.60761	1.4577	1.98202
n/a	ENSMUSG00000056300	ENSMUST00000105735	1.62967	2.3822	2.00439	1.98162
Srsf5	ENSMUSG00000021134	ENSMUST00000094693	6.77081	1.15748	0.992153	1.98112
Dnm2	ENSMUSG00000033335	uc009olk.1	1.22769	1.67958	3.75829	1.97891
Hus1	ENSMUSG00000020413	uc007hzr.1	2.1599	1.418	2.48089	1.96595
Urm1	ENSMUSG00000069020	ENSMUST00000147325	1.92977	1.70912	2.29528	1.96353
Ash2l	ENSMUSG00000031575	ENSMUST00000110610	1.01249	2.88018	2.5648	1.95564
Wbscr16	ENSMUSG00000061979	ENSMUST00000076228	4.69048	1.00492	1.56136	1.94514
Gm13251	ENSMUSG00000070605	ENSMUST00000105733	1.28813	2.83573	2.00584	1.94226
BC002221	ENSMUSG00000005506	ENSMUST00000068747	0.923992	3.20122	2.46466	1.93901
n/a	AK050586	uc009qtx.1	2.04407	2.35357	1.5103	1.93685
Fam13b	ENSMUSG00000036501	uc008eko.1	2.8786	1.89059	1.33135	1.93505
BC034252	ENSMUSG00000029208	ENSMUST00000132169	2.88289	1.6011	1.5644	1.93285
5330429B09Rik	ENSMUSG00000071796	uc009lav.1	4.33255	1.30191	1.26087	1.92308
Slc25a3	ENSMUSG00000061904	ENSMUST00000163246	0.929889	2.60159	2.92646	1.92016
Ubb	ENSMUSG00000019505	ENSMUST00000168766	0.977077	2.87666	2.51531	1.91927
Gm6900	ENSMUSG00000091026	ENSMUST00000171969	0.993919	2.46763	2.84801	1.91157
Inpp5d	ENSMUSG00000026288	ENSMUST00000170300	1.05042	2.15367	3.05868	1.90557
Taf1d	ENSMUSG00000031939	uc009ofs.1	5.3437	0.915762	1.41111	1.90427
Pigx	ENSMUSG00000023791	ENSMUST00000133584	1.80126	1.37343	2.79006	1.904
Zfp219	ENSMUSG00000049295	ENSMUST00000067549	2.99243	1.2873	1.78626	1.90203
Fam178a	ENSMUSG00000036097	ENSMUST00000087330	1.70969	2.10659	1.91045	1.902
Srrm1	ENSMUSG00000028809	ENSMUST00000105862	2.25385	2.24233	1.35982	1.90123
Fam43a	ENSMUSG00000046546	ENSMUST00000059078	3.05533	1.39615	1.60412	1.89849
Es113	ENSMUSG00000055228	uc007qwv.1	1.33699	2.26761	2.23984	1.89367
Armc6	ENSMUSG00000002343	ENSMUST00000019679	1.06503	1.46928	4.33902	1.89359
H3f3b	ENSMUSG00000060743	ENSMUST00000081026	3.60378	1.8631	1.00635	1.89051
1110057K04Rik	ENSMUSG00000037669	uc007mzk.1	1.26082	1.98516	2.69588	1.88966
Bloc1s2	ENSMUSG00000057506	ENSMUST00000079033	2.78378	1.24308	1.90444	1.87485
Nhp2l1	ENSMUSG00000063480	ENSMUST00000080622	1.68188	1.48716	2.63275	1.87436
Rbm18	ENSMUSG00000026889	ENSMUST00000134668	1.66301	1.93284	2.03978	1.87165
Necap2	ENSMUSG00000028923	ENSMUST00000152915	2.80644	1.6306	1.43079	1.8708
Brcc3	ENSMUSG00000031201	ENSMUST00000033544	1.51054	2.48794	1.72937	1.86618
Dcun1d2	ENSMUSG00000038506	ENSMUST00000045366	1.63341	1.50328	2.61783	1.85934
Mtmr12	ENSMUSG00000039458	uc007vhm.1	2.08605	2.54405	1.20433	1.8558
Haus8	ENSMUSG00000035439	ENSMUST00000110071	1.72211	1.68523	2.19921	1.85493
Cenpt	ENSMUSG00000036672	uc009neg.1	1.93853	2.02541	1.62329	1.85407
Alkbh6	ENSMUSG00000042831	ENSMUST00000143369	2.55371	1.6142	1.53117	1.84807
B3gntl1	ENSMUSG00000046605	ENSMUST00000067399	1.83718	2.09204	1.63928	1.84696
Mcm8	ENSMUSG00000027353	ENSMUST00000135685	1.77218	2.00829	1.76899	1.84652
Gm13152	ENSMUSG00000078496	ENSMUST00000105721	1.91203	2.0638	1.57488	1.83853
Snapc4	ENSMUSG00000036281	ENSMUST00000114115	1.84836	1.72454	1.94344	1.83658
AK006991	ENSMUSG00000069200	ENSMUST00000080170	1.01058	2.30353	2.65188	1.83445
Cdyl	ENSMUSG00000059288	ENSMUST00000075220	2.23491	1.94721	1.411	1.83119
Aurkaip1	ENSMUSG00000065990	ENSMUST00000105592	1.50794	3.0395	1.3387	1.83073
Gm1943	ENSMUSG00000039828	uc007veh.1	1.55604	2.13865	1.8315	1.82665
Kiaa1310	ENSMUSG00000010453	ENSMUST00000010597	1.55508	2.27467	1.71955	1.82542
Atg12	ENSMUSG00000032905	ENSMUST00000035648	1.559	2.36148	1.64945	1.82442
Usp19	ENSMUSG00000006676	uc009rpw.1	3.48848	1.34397	1.29307	1.8234
Pla2g5	ENSMUSG00000041193	uc008vlj.1	1.0758	3.53263	1.59134	1.82193
Exog	ENSMUSG00000042787	uc009sbb.1	2.135	1.68407	1.67956	1.82104
Net1	ENSMUSG00000021215	uc007pje.1	1.96884	1.47549	2.07784	1.82076
Dusp16	ENSMUSG00000030203	ENSMUST00000081261	4.31463	1.24552	1.11673	1.81725
AK171116	ENSMUSG00000028581	ENSMUST00000116245	1.13218	2.35954	2.23213	1.81337
Syncrip	ENSMUSG00000032423	uc009qyp.1	1.06702	2.62001	2.13133	1.81291
Mrps26	ENSMUSG00000037740	ENSMUST00000046149	1.63217	1.80184	2.01777	1.81044
Ik	ENSMUSG00000024474	uc008eok.1	3.3881	1.68852	1.03669	1.8101
Ccdc76	ENSMUSG00000033439	ENSMUST00000128013	3.48943	1.36852	1.24108	1.80968
Cdk10	ENSMUSG00000033862	uc009nuo.1	2.18572	2.56642	1.05203	1.80711
Zfp936	ENSMUSG00000064194	uc009gmh.1	1.48819	2.46707	1.59946	1.80414
Slc30a2	ENSMUSG00000028836	ENSMUST00000105874	2.45105	2.53071	0.946696	1.80413
Zfp318	ENSMUSG00000015597	ENSMUST00000113479	2.54764	1.40908	1.63089	1.80232
Mrm1	ENSMUSG00000018405	ENSMUST00000018549	1.56617	2.00348	1.81737	1.78658
Dnalc4	ENSMUSG00000022420	ENSMUST00000023055	1.03893	1.76955	3.09472	1.78522
Slc3a2	ENSMUSG00000010095	ENSMUST00000010239	0.966789	1.52609	3.83522	1.78197
Nfkbib	ENSMUSG00000030595	uc009fzs.1	1.2945	2.0849	2.0908	1.78033
Suv420h2	ENSMUSG00000059851	ENSMUST00000108583	3.5803	1.38895	1.13379	1.77983
Etv1	ENSMUSG00000004151	uc007nkp.1	1.63603	1.42477	2.40804	1.77719
Sec61a1	ENSMUSG00000030082	ENSMUST00000130918	1.11021	2.0362	2.47316	1.77484
1600002H07Rik	ENSMUSG00000024118	ENSMUST00000137648	3.05782	1.26601	1.43757	1.77212
Zfp217	ENSMUSG00000052056	ENSMUST00000063710	1.21231	2.19897	2.08649	1.77181
Tada3	ENSMUSG00000048930	uc009dfp.1	2.58777	1.41184	1.51738	1.76984
Spin1	ENSMUSG00000021395	uc007qly.1	0.943549	2.65266	2.21427	1.76967
Arrdc4	ENSMUSG00000042659	ENSMUST00000048068	4.38757	0.974478	1.29161	1.76757
Gm4983	ENSMUSG00000073158	uc007neh.1	1.21046	2.00301	2.27167	1.76601
Zfp810	ENSMUSG00000066829	uc009ooj.1	2.16641	1.89132	1.33955	1.76396
Mecp2	ENSMUSG00000031393	ENSMUST00000123362	2.43823	2.12024	1.0598	1.7629
Triml2	ENSMUSG00000091490	ENSMUST00000164829	1.95734	1.60943	1.73556	1.76167
Ears2	ENSMUSG00000030871	ENSMUST00000147397	4.98009	0.920191	1.19182	1.76107
Dnm1l	ENSMUSG00000022789	uc007yij.1	1.43449	1.99691	1.90425	1.76033
s11-6	ENSMUSG00000066880	uc009mfa.1	1.83177	1.5339	1.93982	1.75985
mKIAA0137	ENSMUSG00000041997	ENSMUST00000135128	2.80288	1.61583	1.19814	1.75726
Cep55	ENSMUSG00000024989	uc008hiy.1	2.22206	1.53227	1.58881	1.75544
2610305D13Rik	ENSMUSG00000066000	ENSMUST00000105720	1.82143	1.77665	1.66383	1.7527
Rbm6	ENSMUSG00000032582	ENSMUST00000035201	1.07265	2.27826	2.19187	1.74968
Zscan20	ENSMUSG00000061894	uc008uvd.1	2.03802	1.56694	1.66391	1.74501
Stoml1	ENSMUSG00000032333	uc009pwt.1	0.998242	2.4175	2.19578	1.7434
Stag1	ENSMUSG00000037286	ENSMUST00000041418	0.978274	2.56899	2.0972	1.74029
Calcoco2	ENSMUSG00000006056	ENSMUST00000097162	1.02938	2.46438	2.07373	1.73918
Rnf168	ENSMUSG00000014074	ENSMUST00000171474	1.3523	1.88434	2.04687	1.73423
Foxred2	ENSMUSG00000016552	uc007woi.1	1.91705	1.6647	1.63212	1.73343
Ddost	ENSMUSG00000028757	ENSMUST00000030538	1.4548	1.6245	2.20384	1.73341
Lrdd	ENSMUSG00000025507	ENSMUST00000147268	3.02609	1.16712	1.47166	1.73221
Brd2	ENSMUSG00000024335	ENSMUST00000025193	1.79123	1.12911	2.5651	1.73114
Aebp2	ENSMUSG00000030232	uc009eol.1	1.55409	1.8402	1.81298	1.73079
Sgk1	ENSMUSG00000019970	ENSMUST00000020145	1.0647	2.76874	1.75756	1.73038
Zfp97	ENSMUSG00000073452	uc008apb.1	2.50251	1.35155	1.53091	1.73003
Tpm3	ENSMUSG00000027940	ENSMUST00000118566	1.39516	1.82603	2.0314	1.72972
Zfp639	ENSMUSG00000027667	uc008owg.1	1.30096	2.94729	1.34816	1.72906
Bcl10	ENSMUSG00000028191	ENSMUST00000170398	1.67748	1.77067	1.74031	1.72905
Ythdc1	ENSMUSG00000035851	ENSMUST00000156363	3.42256	1.18319	1.27336	1.72764
Sf3b2	ENSMUSG00000024853	ENSMUST00000025774	1.51086	1.52092	2.24235	1.72721
Rpap2	ENSMUSG00000033773	ENSMUST00000065422	1.30072	2.61125	1.51643	1.72697
Klhl7	ENSMUSG00000028986	uc008wqx.1	2.04605	1.6244	1.54945	1.72688
Fam122b	ENSMUSG00000036022	uc009tew.1	1.74408	1.796	1.6369	1.72438
Hps3	ENSMUSG00000027615	ENSMUST00000108321	2.69842	1.05979	1.78868	1.72301
Klc1	ENSMUSG00000021288	ENSMUST00000084941	1.17985	1.29714	3.33774	1.72222
Slc35b1	ENSMUSG00000020873	ENSMUST00000141284	1.81336	1.30452	2.15713	1.72162
Usp16	ENSMUSG00000025616	ENSMUST00000144759	2.34973	1.38632	1.55946	1.71904
Zmym4	ENSMUSG00000042446	ENSMUST00000106108	1.61162	2.57916	1.2195	1.71781
Cecr5	ENSMUSG00000058979	ENSMUST00000075303	1.20314	2.36517	1.77953	1.71723
Unk	ENSMUSG00000020770	ENSMUST00000021116	3.81881	0.951203	1.39279	1.71671
2410042D21Rik	ENSMUSG00000027132	ENSMUST00000028552	1.32307	1.40241	2.70688	1.71255
Dtymk	ENSMUSG00000026281	ENSMUST00000112890	1.48221	2.12895	1.58789	1.71119
Eif4a2	ENSMUSG00000022884	ENSMUST00000141392	1.215	1.91362	2.11804	1.70133
Gtf2h2	ENSMUSG00000021639	uc007rqt.1	1.24468	1.47687	2.67094	1.69963
Stil	ENSMUSG00000028718	ENSMUST00000030490	1.98669	1.40641	1.75597	1.69924
Sesn1	ENSMUSG00000038332	ENSMUST00000099931	1.37912	1.77609	2.00064	1.69855
n/a	BC049144	uc007qwu.1	1.44781	1.6879	2.00178	1.69756
2610002D18Rik	ENSMUSG00000078521	ENSMUST00000105866	1.64772	0.945375	3.1232	1.69445
Armcx5	ENSMUSG00000072969	ENSMUST00000096321	2.72912	1.22147	1.44779	1.68994
lkb1	ENSMUSG00000003068	ENSMUST00000105370	2.09382	1.54094	1.49567	1.68987
Tpst2	ENSMUSG00000029344	ENSMUST00000071455	2.876	1.54084	1.08085	1.68566
Slc35f2	ENSMUSG00000042195	uc009pmo.1	2.06526	1.27347	1.81828	1.68477
Atp6v0b	ENSMUSG00000033379	ENSMUST00000036380	1.03841	2.61014	1.76433	1.68476
Ikzf5	ENSMUSG00000040167	uc009kbj.1	3.3146	1.03516	1.39358	1.6847
Hnrnpa1	ENSMUSG00000046434	uc007xxs.1	2.76587	1.36214	1.26875	1.68452
Dtl	ENSMUSG00000037474	ENSMUST00000027933	2.2004	1.41316	1.5159	1.67669
Csrnp1	ENSMUSG00000032515	uc009sbu.1	3.65378	1.14732	1.12309	1.67602
mszf37	ENSMUSG00000052446	ENSMUST00000131237	1.84457	1.99452	1.27851	1.67551
Smurf2	ENSMUSG00000018363	ENSMUST00000139297	1.16349	1.75784	2.28996	1.6731
Wsb1	ENSMUSG00000017677	ENSMUST00000017821	1.83426	1.57666	1.61925	1.67303
Gabarap	ENSMUSG00000018567	ENSMUST00000018711	0.983163	1.96782	2.4157	1.67193
Zc3h8	ENSMUSG00000027387	ENSMUST00000028866	1.31059	1.77377	2.00856	1.67141
Tspyl2	ENSMUSG00000041096	uc009uqg.1	2.13389	1.28628	1.6963	1.66982
AK165532	ENSMUSG00000025979	ENSMUST00000159311	1.31648	1.66444	2.12339	1.66944
Wdr76	ENSMUSG00000027242	uc008lzj.1	2.28618	0.941544	2.16068	1.66922
Nupr1	ENSMUSG00000030717	ENSMUST00000032961	1.3101	1.78239	1.9893	1.66854
Coro7	ENSMUSG00000039637	ENSMUST00000038552	1.41544	1.76647	1.8576	1.66846
Gm13157	ENSMUSG00000078495	ENSMUST00000122309	1.6161	1.88051	1.52812	1.6684
Prpf31	ENSMUSG00000008373	ENSMUST00000008517	1.95833	1.92962	1.2259	1.66701
Atpaf2	ENSMUSG00000042709	ENSMUST00000145532	2.88725	1.33306	1.20277	1.66663
Gins3	ENSMUSG00000031669	ENSMUST00000034094	2.01038	1.47806	1.55271	1.66477
Slc25a38	ENSMUSG00000032519	ENSMUST00000035106	1.21532	3.20008	1.18406	1.6637
Ccbl1	ENSMUSG00000039648	ENSMUST00000044038	1.7066	1.62127	1.65182	1.65952
Dusp27	ENSMUSG00000026564	ENSMUST00000085992	1.14055	2.24486	1.77965	1.65785
Slmo1	ENSMUSG00000024530	ENSMUST00000025411	1.70597	2.16629	1.23112	1.65703
Armc10	ENSMUSG00000038525	ENSMUST00000072896	1.15704	1.85645	2.11294	1.65567
Aagab	ENSMUSG00000037257	ENSMUST00000041551	1.34427	1.73535	1.94075	1.6543
8430406I07Rik	ENSMUSG00000027424	ENSMUST00000110028	2.35398	1.16426	1.6484	1.65313
Ipo8	ENSMUSG00000040029	ENSMUST00000048418	1.49197	1.73873	1.73994	1.65263
Gtdc1	ENSMUSG00000036890	ENSMUST00000049051	0.974923	2.38474	1.94067	1.65242
Rbm22	ENSMUSG00000024604	ENSMUST00000025506	1.05234	1.75115	2.44076	1.6507
Ppp1r10	ENSMUSG00000039220	ENSMUST00000087211	1.1831	1.63361	2.32691	1.65063
EG630579	ENSMUSG00000074867	uc007qwt.1	1.01881	1.9668	2.23092	1.64732
Ssna1	ENSMUSG00000026966	ENSMUST00000141470	1.54486	2.74788	1.05147	1.6465
Rad52	ENSMUSG00000030166	ENSMUST00000161816	2.45325	1.35612	1.34117	1.64629
mKIAA1606	ENSMUSG00000054199	ENSMUST00000090942	2.19879	1.38012	1.45841	1.64183
Poli	ENSMUSG00000038425	ENSMUST00000161542	1.06876	1.56931	2.63328	1.6407
Rnd3	ENSMUSG00000017144	ENSMUST00000017288	2.33468	1.50108	1.258	1.63973
Zfp93	ENSMUSG00000055305	ENSMUST00000032696	3.15511	1.51002	0.920446	1.63681
Arrdc2	ENSMUSG00000002910	ENSMUST00000098656	1.31845	1.99274	1.66762	1.63633
Slc35b1	ENSMUSG00000020873	ENSMUST00000131193	1.98045	1.31363	1.67886	1.63462
Zfp689	ENSMUSG00000048921	ENSMUST00000053392	3.72287	1.12476	1.03937	1.63268
Dusp1	ENSMUSG00000024190	ENSMUST00000025025	1.04339	1.76023	2.36453	1.6315
Zfp719	ENSMUSG00000030469	ENSMUST00000058104	2.3613	1.31491	1.39669	1.63073
Sf3b2	ENSMUSG00000024853	uc008gcl.1	1.01926	1.82861	2.32645	1.63067
Arid5b	ENSMUSG00000019947	uc007fmf.1	1.54474	1.58213	1.77397	1.6306
Rnf41	ENSMUSG00000025373	ENSMUST00000096386	0.971401	2.52511	1.76681	1.63038
4632415L05Rik	ENSMUSG00000048106	ENSMUST00000059704	2.03134	1.9288	1.1032	1.62895
Gpd1l	ENSMUSG00000050627	ENSMUST00000129305	1.05997	1.74297	2.33519	1.62793
Tex264	ENSMUSG00000040813	uc009rkl.1	2.12994	1.1653	1.73666	1.62744
A730069N07Rik	ENSMUSG00000031523	uc009llq.1	1.31104	1.41395	2.32123	1.62651
Numb	ENSMUSG00000021224	ENSMUST00000135962	2.64435	1.08248	1.49853	1.62481
n/a	ENSMUSG00000058050	ENSMUST00000077747	0.98114	1.84119	2.36049	1.6216
2810021J22Rik	ENSMUSG00000020491	ENSMUST00000073924	2.6664	1.22392	1.30577	1.62124
Slc25a36	ENSMUSG00000032449	ENSMUST00000148337	1.2135	1.60793	2.17591	1.61926
Cggbp1	ENSMUSG00000054604	uc007zqe.1	2.04029	1.25607	1.65384	1.61833
Zfp68	ENSMUSG00000058291	ENSMUST00000110905	1.43697	1.57001	1.87634	1.61766
Pkp4	ENSMUSG00000026991	ENSMUST00000112577	1.61955	1.66467	1.56406	1.61557
Flame-3	ENSMUSG00000054499	uc009frt.1	2.38509	1.50511	1.17448	1.6155
Cwf19l1	ENSMUSG00000025200	uc008hpk.1	1.66575	1.36772	1.84394	1.61356
Hras1	ENSMUSG00000025499	ENSMUST00000124971	1.05103	2.32993	1.71183	1.6124
Hnrnph2	ENSMUSG00000045427	ENSMUST00000059297	1.55203	1.62861	1.65789	1.61222
Fam160b2	ENSMUSG00000022095	ENSMUST00000022690	1.52758	1.83499	1.48535	1.60875
Zswim1	ENSMUSG00000017764	ENSMUST00000017908	2.09545	1.03693	1.90759	1.60634
Mtif3	ENSMUSG00000016510	ENSMUST00000110566	1.60308	1.55986	1.65667	1.60605
Gm949	ENSMUSG00000073568	uc008evy.1	0.949908	3.08884	1.40651	1.60401
Psmc5	ENSMUSG00000020708	ENSMUST00000133131	1.61094	1.37347	1.86363	1.60357
Tmem126b	ENSMUSG00000030614	ENSMUST00000032843	1.8433	1.63347	1.36724	1.6027
Sugp1	ENSMUSG00000011306	uc009lyn.1	1.95588	1.30538	1.61219	1.60262
Chchd5	ENSMUSG00000037938	ENSMUST00000035481	1.73863	1.84806	1.27806	1.60137
Dtnb	ENSMUSG00000071454	uc007mwx.1	1.57011	2.04753	1.2756	1.60063
Ddx50	ENSMUSG00000020076	uc007fho.1	1.68273	1.88449	1.29122	1.59981
Clybl	ENSMUSG00000025545	ENSMUST00000026625	2.29354	1.67047	1.06021	1.59556
Eif1b	ENSMUSG00000006941	ENSMUST00000007139	1.15319	1.6692	2.1079	1.59497
Sharpin	ENSMUSG00000022552	ENSMUST00000144816	1.90272	1.59975	1.33281	1.5949
Ppm1k	ENSMUSG00000037826	ENSMUST00000042766	1.83077	1.40852	1.57264	1.59469
Chd2	ENSMUSG00000078671	ENSMUST00000169922	2.35328	1.50524	1.14401	1.5943
Dhps	ENSMUSG00000060038	ENSMUST00000129826	1.77993	1.39745	1.62613	1.5933
Dppa2	ENSMUSG00000072419	ENSMUST00000097175	1.13003	1.69103	2.11524	1.59294
Pigl	ENSMUSG00000014245	ENSMUST00000145334	1.15188	2.28689	1.52975	1.59132
2410131K14Rik	ENSMUSG00000032840	ENSMUST00000049138	1.36056	2.03372	1.45377	1.59038
2310003C23Rik	ENSMUSG00000027573	ENSMUST00000029090	0.964745	2.2295	1.86635	1.5893
Gtf2e1	ENSMUSG00000022828	ENSMUST00000023525	1.88767	1.41666	1.4971	1.58787
Zfand3	ENSMUSG00000044477	uc008btq.1	1.42264	3.01838	0.932057	1.58771
Kiaa0892	ENSMUSG00000031858	ENSMUST00000168013	1.36683	1.64208	1.78272	1.58756
Gm13154	ENSMUSG00000065999	ENSMUST00000081742	1.34047	2.03502	1.46552	1.5871
Snx11	ENSMUSG00000020876	ENSMUST00000107661	1.60243	1.82821	1.3636	1.58671
Rest	ENSMUSG00000029249	ENSMUST00000113449	1.05362	2.11122	1.79535	1.58656
Dhtkd1	ENSMUSG00000025815	ENSMUST00000026924	0.966417	1.94405	2.12037	1.58524
4930503L19Rik	ENSMUSG00000044906	uc008foe.1	3.02167	1.12433	1.1721	1.58502
D230037D09Rik	ENSMUSG00000046675	uc007oul.1	2.22164	1.66519	1.07106	1.5824
Naa40	ENSMUSG00000024764	uc008gkk.1	1.3073	1.85183	1.63485	1.5818
Ooep	ENSMUSG00000032346	ENSMUST00000034900	1.06777	2.10743	1.74802	1.57855
4933436C20Rik	ENSMUSG00000031736	uc009mua.1	1.40268	1.29978	2.1537	1.57763
AK134400	ENSMUSG00000032712	ENSMUST00000100765	1.25713	1.81918	1.71594	1.57732
Caper	ENSMUSG00000027620	uc008nmp.1	1.14817	1.4661	2.32904	1.57682
Dmwd	ENSMUSG00000030410	uc009fkm.1	1.20147	1.5233	2.14147	1.57666
Arfgap1	ENSMUSG00000027575	ENSMUST00000029092	1.14008	1.79672	1.89944	1.57282
Zfyve20	ENSMUSG00000014550	ENSMUST00000014694	1.18435	1.57042	2.0904	1.57245
2610305D13Rik	ENSMUSG00000066000	uc008vsz.1	1.64335	1.36421	1.73337	1.57217
Zfp825	ENSMUSG00000069208	uc007rfg.1	1.52341	1.62188	1.57179	1.57184
4930503L19Rik	ENSMUSG00000044906	uc008fof.1	1.79617	1.36186	1.58648	1.57147
Dync1li2	ENSMUSG00000035770	ENSMUST00000041769	1.1009	2.01859	1.74629	1.57146
Tcerg1	ENSMUSG00000024498	uc008ety.1	2.79009	1.15266	1.20614	1.57123
Zdhhc4	ENSMUSG00000001844	ENSMUST00000162287	2.03567	1.60851	1.1811	1.56966
Wdr92	ENSMUSG00000078970	uc007icd.1	1.51477	2.13563	1.19474	1.56933
Arrdc2	ENSMUSG00000002910	uc009mbs.1	1.09482	1.64518	2.14303	1.56866
n/a	ENSMUSG00000078872	ENSMUST00000108969	1.70634	1.46289	1.53512	1.56486
Arhgap9	ENSMUSG00000040345	uc007hje.1	0.92677	2.44918	1.68683	1.56443
Zfp493	ENSMUSG00000090659	ENSMUST00000164936	2.70438	1.10513	1.27791	1.56313
Mtmr7	ENSMUSG00000039431	ENSMUST00000048890	1.21026	1.61699	1.95032	1.56278
Gpr89	ENSMUSG00000028096	ENSMUST00000029738	1.46827	1.5884	1.63152	1.56118
Snap23	ENSMUSG00000027287	ENSMUST00000150611	1.29116	2.07241	1.41536	1.55874
Eif4a1	ENSMUSG00000059796	ENSMUST00000102589	1.19524	1.0963	2.88441	1.55769
Plaa	ENSMUSG00000028577	uc008tsd.1	1.07044	1.99644	1.75231	1.5529
Klf2	ENSMUSG00000055148	ENSMUST00000067912	1.78205	1.39852	1.50172	1.5526
Upf2	ENSMUSG00000043241	ENSMUST00000060092	1.40318	1.53911	1.73025	1.55178
Cdv3	ENSMUSG00000032803	ENSMUST00000116517	0.959507	1.81472	2.13112	1.54818
Gde1	ENSMUSG00000033917	ENSMUST00000038791	1.2789	1.75351	1.65351	1.54781
Sumo3	ENSMUSG00000020265	ENSMUST00000137841	1.27901	1.94367	1.49126	1.54769
Hsd17b11	ENSMUSG00000029311	ENSMUST00000031251	1.37379	1.59552	1.68916	1.54703
Gm7325	ENSMUSG00000079471	ENSMUST00000169137	1.20959	1.82127	1.67745	1.54604
Cd9	ENSMUSG00000030342	ENSMUST00000032492	1.34906	1.3144	2.07855	1.54468
Slc27a1	ENSMUSG00000031808	uc009mea.1	1.10505	1.4326	2.3245	1.54387
Tyms	ENSMUSG00000025747	ENSMUST00000141630	1.80703	1.27734	1.5894	1.54229
Vps37b	ENSMUSG00000066278	ENSMUST00000040967	2.14471	1.54874	1.10379	1.54198
Slbp	ENSMUSG00000004642	ENSMUST00000148153	1.72226	1.24018	1.71516	1.54157
Hdac6	ENSMUSG00000031161	ENSMUST00000033501	0.964852	2.01521	1.87559	1.53924
Trafd1	ENSMUSG00000042726	ENSMUST00000120784	1.77022	1.50306	1.37049	1.53919
Pan3	ENSMUSG00000029647	uc009aoe.1	2.24051	1.12541	1.44382	1.53836
Otx2	ENSMUSG00000021848	uc007tjq.1	1.81311	1.2976	1.54725	1.5383
Ccnt2	ENSMUSG00000026349	ENSMUST00000112570	1.74407	1.54801	1.34566	1.53729
Sgo1	ENSMUSG00000023940	ENSMUST00000024736	1.20685	1.56847	1.91506	1.53616
Rdx	ENSMUSG00000032050	uc009plq.2	1.10762	2.38701	1.36381	1.53344
Prr3	ENSMUSG00000038500	ENSMUST00000172429	2.221	1.47479	1.09937	1.53276
Fn1	ENSMUSG00000026193	uc007bkb.1	1.25488	1.67092	1.71639	1.53247
Tmed3	ENSMUSG00000032353	ENSMUST00000058488	1.92884	1.607	1.16097	1.53242
1700019D03Rik	ENSMUSG00000043629	ENSMUST00000114492	1.50116	1.87919	1.2736	1.53159
Ikbkg	ENSMUSG00000004221	ENSMUST00000114127	1.1053	2.66462	1.21422	1.52922
Zfp607	ENSMUSG00000020420	uc009fxg.1	1.64277	1.4526	1.49623	1.52841
Fbxo22	ENSMUSG00000032309	uc009pse.1	1.50908	1.38752	1.70486	1.52832
n/a	AK049668	uc008ykq.1	2.0835	1.21374	1.40989	1.52768
Smg5	ENSMUSG00000001415	ENSMUST00000001451	1.66153	1.68218	1.27556	1.52766
N6amt1	ENSMUSG00000044442	ENSMUST00000118310	1.75228	1.53236	1.32619	1.52706
Nphp3	ENSMUSG00000032558	uc009rhg.1	1.09501	1.63316	1.98883	1.52644
Lyrm2	ENSMUSG00000045854	uc008sfe.1	1.37899	1.98065	1.30096	1.52596
4922501C03Rik	ENSMUSG00000056919	ENSMUST00000093802	2.18125	1.33772	1.21749	1.52585
Tesc	ENSMUSG00000029359	uc008zgd.1	1.0443	2.11368	1.60918	1.52577
Cep55	ENSMUSG00000024989	ENSMUST00000096096	1.76307	1.50021	1.338	1.52391
Sf1	ENSMUSG00000024949	ENSMUST00000131083	2.08311	1.17537	1.44186	1.52266
Gm10094	ENSMUSG00000021963	ENSMUST00000143600	1.90932	1.24946	1.47528	1.5211
Zfp13	ENSMUSG00000062012	ENSMUST00000115516	1.24271	1.7873	1.58367	1.52082
Tet2	ENSMUSG00000040943	uc008rkq.2	1.0885	1.68407	1.91338	1.51937
Zfp781	ENSMUSG00000062540	uc007gjg.1	2.31398	1.11732	1.35557	1.51899
Fbxo31	ENSMUSG00000031811	ENSMUST00000034268	1.0406	1.7454	1.92903	1.51882
Zcchc6	ENSMUSG00000035248	uc007qvh.1	1.47072	1.48563	1.59907	1.51741
Fxr1	ENSMUSG00000027680	ENSMUST00000001620	1.46193	1.72885	1.38235	1.5174
Ormdl3	ENSMUSG00000038150	ENSMUST00000052919	1.23979	2.41483	1.16505	1.51656
Zfp97	ENSMUSG00000073452	ENSMUST00000147630	1.95653	1.33374	1.33519	1.516
Fam133b	ENSMUSG00000058503	uc008wgy.1	2.32927	1.25414	1.19215	1.51577
Arpc3	ENSMUSG00000029465	ENSMUST00000031421	2.53415	1.26985	1.08048	1.51496
Zfp605	ENSMUSG00000023284	ENSMUST00000112528	1.56154	1.52084	1.4593	1.51331
Ube2d1	ENSMUSG00000019927	ENSMUST00000020085	1.3974	2.26749	1.09175	1.51239
Zfp869	ENSMUSG00000054648	uc009lxm.1	2.37387	1.19592	1.21664	1.51161
Lace1	ENSMUSG00000038302	ENSMUST00000041024	1.23694	1.44977	1.9233	1.51088
Cyb5d1	ENSMUSG00000044795	ENSMUST00000108660	1.65935	1.90737	1.08832	1.51023
Wdr37	ENSMUSG00000021147	ENSMUST00000021572	1.52163	1.59279	1.41094	1.50658
Zfp870	ENSMUSG00000057254	uc008bxp.1	1.45091	1.36986	1.71808	1.50587
Gtf3c4	ENSMUSG00000035666	ENSMUST00000037117	1.27768	1.91932	1.39141	1.50548
Tradd	ENSMUSG00000031887	ENSMUST00000034359	1.54249	1.41046	1.5682	1.50543
Rap1gds1	ENSMUSG00000028149	uc008rnt.1	1.27668	2.07321	1.28839	1.50519
Ccnl2	ENSMUSG00000029068	ENSMUST00000030944	2.93027	0.974872	1.19156	1.50426
Surf6	ENSMUSG00000036160	ENSMUST00000047632	1.29822	1.63971	1.59654	1.50348
Brd2	ENSMUSG00000024335	ENSMUST00000095347	2.04812	1.5293	1.08265	1.50237
Pole3	ENSMUSG00000028394	ENSMUST00000030091	1.60874	1.54134	1.36254	1.50053
Hel308	ENSMUSG00000035266	ENSMUST00000044684	1.92719	1.31172	1.3352	1.50005
Tmem87a	ENSMUSG00000033808	uc008lvm.1	1.61958	1.44045	1.44212	1.49842
2410075B13Rik	ENSMUSG00000044095	ENSMUST00000056439	1.38114	1.42584	1.70492	1.4974
Zbed6	ENSMUSG00000026464	uc007cqo.1	1.21139	1.36015	2.03522	1.49679
lkb1	ENSMUSG00000003068	ENSMUST00000144119	2.07865	1.20173	1.34221	1.4967
Tmem186	ENSMUSG00000043140	ENSMUST00000052505	1.48169	1.45123	1.5544	1.49515
Trim24	ENSMUSG00000029833	ENSMUST00000120428	1.06555	2.56412	1.22187	1.49456
Dennd2c	ENSMUSG00000007379	uc008qss.1	1.51353	1.3087	1.68112	1.49329
AI314976	ENSMUSG00000040771	uc008cxw.1	1.52065	1.60921	1.3593	1.49274
Chd9	ENSMUSG00000056608	ENSMUST00000048665	2.01678	1.38467	1.19107	1.49273
Ankrd10	ENSMUSG00000031508	uc009kvq.1	1.28315	1.27616	2.02748	1.49181
Hnrnph2	ENSMUSG00000045427	ENSMUST00000113203	1.28696	1.64532	1.56772	1.49174
Sec16a	ENSMUSG00000026924	uc008ivi.1	1.84868	1.71458	1.04505	1.49068
Ypel5	ENSMUSG00000039770	ENSMUST00000045174	1.53755	1.7342	1.23979	1.48968
Safb2	ENSMUSG00000042625	ENSMUST00000140037	1.76867	1.24215	1.50118	1.48851
Zufsp	ENSMUSG00000039531	uc007euk.1	1.4002	1.58912	1.482	1.48844
Prkab2	ENSMUSG00000038205	ENSMUST00000045743	1.39723	1.65976	1.42002	1.48777
Setd4	ENSMUSG00000022948	ENSMUST00000123756	1.59007	1.33043	1.55658	1.48774
n/a	ENSMUSG00000040573	uc008pwx.1	2.20375	1.35696	1.0988	1.48668
Dbt	ENSMUSG00000000340	ENSMUST00000000349	1.13316	1.55427	1.86158	1.48559
Xylb	ENSMUSG00000035769	uc009saw.1	1.77388	1.81627	1.01758	1.48556
Arap2	ENSMUSG00000037999	ENSMUST00000076623	1.41396	1.57107	1.47501	1.48528
Ube2g2	ENSMUSG00000009293	uc007fwa.1	1.65687	1.69077	1.16878	1.48491
Mbd1	ENSMUSG00000024561	ENSMUST00000025446	1.60072	1.66612	1.22752	1.48485
Abcf3	ENSMUSG00000003234	uc007ypz.1	1.08423	1.32527	2.27206	1.48348
2610015P09Rik	ENSMUSG00000022701	ENSMUST00000132859	1.34969	1.92124	1.25846	1.48326
4930422G04Rik	ENSMUSG00000051278	ENSMUST00000043108	2.71292	1.28601	0.935153	1.48316
Slc25a36	ENSMUSG00000032449	ENSMUST00000153070	1.12259	1.46428	1.98341	1.48281
Clk3	ENSMUSG00000032316	uc009pvs.1	1.46597	1.61709	1.37489	1.48266
Suv39h1	ENSMUSG00000039231	ENSMUST00000115636	1.23067	1.45909	1.81101	1.48155
Fastkd3	ENSMUSG00000021532	uc007rcb.1	2.18102	1.23655	1.20454	1.48103
Ppap2a	ENSMUSG00000021759	ENSMUST00000016144	2.19168	1.34025	1.10394	1.48014
Eri2	ENSMUSG00000030929	uc009jlu.1	1.29003	1.46956	1.70866	1.47961
Hel308	ENSMUSG00000035266	uc008yhz.1	1.93017	1.29588	1.29496	1.47958
Ift80	ENSMUSG00000027778	uc008plx.1	1.61407	1.42943	1.40204	1.47893
Tbrg4	ENSMUSG00000000384	ENSMUST00000156969	1.56866	1.32284	1.55852	1.47882
Elmod2	ENSMUSG00000035151	ENSMUST00000053902	1.19393	1.51571	1.78543	1.47835
Mtap9	ENSMUSG00000033900	ENSMUST00000091014	0.998055	1.93246	1.6713	1.4772
Srrm1	ENSMUSG00000028809	ENSMUST00000134019	1.51547	1.69733	1.24753	1.47499
Setx	ENSMUSG00000043535	uc008izl.1	1.03958	1.44673	2.1303	1.47422
Mcm2	ENSMUSG00000002870	ENSMUST00000058011	1.62568	1.65719	1.1885	1.4739
BC071190	ENSMUSG00000078902	ENSMUST00000109054	1.23695	1.53213	1.68796	1.47345
Zfp960	ENSMUSG00000067034	ENSMUST00000127027	1.93468	1.21019	1.36254	1.4721
Zfp101	ENSMUSG00000055240	uc008byk.1	1.47109	1.27941	1.69187	1.4712
Prl8a1	ENSMUSG00000019756	ENSMUST00000095926	1.11722	2.10149	1.35599	1.4711
Nhlrc3	ENSMUSG00000042997	ENSMUST00000056749	1.41039	1.69895	1.32105	1.4683
Itgb1bp1	ENSMUSG00000062352	uc007ndl.1	1.03689	1.56553	1.94622	1.46733
Dnajc8	ENSMUSG00000054405	ENSMUST00000094657	1.2099	1.47323	1.77203	1.46722
Eml5	ENSMUSG00000051166	ENSMUST00000065716	1.35659	1.49809	1.55242	1.46667
Gtpbp5	ENSMUSG00000039069	uc008oie.1	1.58924	1.37717	1.44038	1.46629
Kcnk5	ENSMUSG00000023243	ENSMUST00000024011	2.28236	1.10282	1.25242	1.46627
BC027231	ENSMUSG00000036208	ENSMUST00000048788	2.04164	1.11162	1.38682	1.4655
Trim12	ENSMUSG00000066258	uc009ivw.1	1.36238	1.90194	1.21101	1.46402
Fis1	ENSMUSG00000019054	ENSMUST00000111094	1.42298	1.94679	1.13091	1.46324
Fam169b	ENSMUSG00000074071	uc009hjf.1	1.4141	1.45944	1.51697	1.4629
Nsun6	ENSMUSG00000026707	ENSMUST00000028034	1.35504	1.49695	1.54256	1.46262
Arvcf	ENSMUSG00000000325	uc007yns.1	1.19042	1.87498	1.39984	1.46193
Gen1	ENSMUSG00000051235	ENSMUST00000166117	1.52706	1.471	1.3844	1.45963
AK011498	ENSMUSG00000091474	ENSMUST00000163475	1.7409	1.21077	1.47394	1.45916
Ppp2r2a	ENSMUSG00000022052	ENSMUST00000163342	1.63737	1.03189	1.83102	1.45711
Itpkc	ENSMUSG00000003752	uc009fvk.1	2.4406	1.23756	1.02401	1.45699
Zfp606	ENSMUSG00000030386	ENSMUST00000098822	1.27325	1.52407	1.59296	1.45672
Ulk1	ENSMUSG00000029512	uc008yrs.1	1.55589	1.45938	1.36066	1.45646
Gxylt1	ENSMUSG00000036197	ENSMUST00000166993	1.5921	1.4788	1.31089	1.45595
Rrp1b	ENSMUSG00000058392	ENSMUST00000081339	1.22657	2.10133	1.19646	1.45555
Dnajc7	ENSMUSG00000014195	ENSMUST00000014339	1.1599	1.67264	1.58888	1.45537
Slc25a36	ENSMUSG00000032449	ENSMUST00000035024	1.13694	1.43289	1.89002	1.45481
Map2k1	ENSMUSG00000004936	ENSMUST00000005066	1.52248	0.997371	2.02585	1.45436
Tgoln2	ENSMUSG00000056429	ENSMUST00000070524	1.62317	1.36137	1.38794	1.4529
BC100427	ENSMUSG00000058246	uc007rbs.1	1.19274	1.43761	1.78371	1.45157
Epb4.1l5	ENSMUSG00000026383	ENSMUST00000052404	1.7525	1.33931	1.3015	1.45098
Aire	ENSMUSG00000000731	uc007fwq.1	1.00393	1.68561	1.80419	1.45071
Kdm6a	ENSMUSG00000037369	uc009sso.1	1.50258	1.43184	1.41564	1.44953
Ttc1	ENSMUSG00000041278	ENSMUST00000109278	1.1343	1.27701	2.10261	1.44953
Mett11d1	ENSMUSG00000004561	ENSMUST00000168413	1.39911	1.65276	1.31612	1.44917
Mapk14	ENSMUSG00000053436	uc008brm.1	1.80119	1.59069	1.06009	1.4482
Gjc1	ENSMUSG00000034520	ENSMUST00000107075	1.44478	1.14443	1.83319	1.44721
Sdccag1	ENSMUSG00000020982	uc007nsd.1	1.23617	1.65549	1.47997	1.44684
Rbx1	ENSMUSG00000022400	ENSMUST00000023036	1.23316	1.56827	1.56529	1.44659
AK046278	ENSMUSG00000006262	ENSMUST00000113229	1.03572	1.97266	1.47884	1.44568
Tpi1	ENSMUSG00000023456	ENSMUST00000024223	0.99413	1.36671	2.22245	1.44539
AK051514	ENSMUSG00000036779	uc009mrf.1	1.10328	1.1418	2.38819	1.4436
Zfp498	ENSMUSG00000070420	ENSMUST00000094116	2.73708	1.15986	0.946328	1.44293
Rcc1	ENSMUSG00000028896	ENSMUST00000084250	1.11494	0.975051	2.76026	1.44237
Frg1	ENSMUSG00000031590	uc009lnx.1	1.01835	1.48098	1.98949	1.44233
Rbpms	ENSMUSG00000031586	ENSMUST00000033994	1.12348	1.87068	1.42709	1.44213
Sec11a	ENSMUSG00000025724	ENSMUST00000147881	1.97606	1.37286	1.10541	1.44206
C79407	ENSMUSG00000047534	ENSMUST00000052201	0.965721	1.44166	2.15305	1.44186
Ino80d	ENSMUSG00000040865	ENSMUST00000172416	1.20676	1.74481	1.42304	1.44166
Sae1	ENSMUSG00000052833	ENSMUST00000094815	1.25683	2.02483	1.17548	1.44088
Luc7l2	ENSMUSG00000029823	ENSMUST00000160430	0.916887	2.30183	1.41591	1.44037
Gm13138	ENSMUSG00000067919	ENSMUST00000075775	1.78362	1.65429	1.01076	1.43942
Zbtb2	ENSMUSG00000075327	uc007ehg.1	2.50431	1.14729	1.03789	1.43936
Dcbld1	ENSMUSG00000019891	ENSMUST00000069004	0.980882	1.39039	2.1841	1.43883
Giyd1	ENSMUSG00000059772	ENSMUST00000084586	1.18628	1.96487	1.27591	1.43807
Zdhhc17	ENSMUSG00000035798	ENSMUST00000041723	2.06004	1.23975	1.16397	1.43786
Crebl2	ENSMUSG00000032652	ENSMUST00000046303	1.59962	1.37249	1.3535	1.43768
Immt	ENSMUSG00000052337	uc009chn.1	1.26022	1.3976	1.68626	1.43742
Srsf1	ENSMUSG00000018379	uc007kvc.1	1.29943	1.59086	1.43657	1.43737
Usp49	ENSMUSG00000023984	ENSMUST00000146105	1.11956	1.16427	2.2765	1.437
Rbpj	ENSMUSG00000039191	ENSMUST00000087360	1.47885	1.46645	1.36731	1.43666
Serac1	ENSMUSG00000015659	ENSMUST00000097432	1.35108	1.57063	1.39494	1.43583
Pigyl	ENSMUSG00000010607	ENSMUST00000148088	1.19564	1.13947	2.17259	1.4358
Ccdc77	ENSMUSG00000030177	uc009dna.1	1.1736	1.81238	1.39118	1.43566
Atp5j	ENSMUSG00000022890	ENSMUST00000146103	1.34165	1.38091	1.58962	1.4334
Acvr2a	ENSMUSG00000052155	ENSMUST00000063886	1.775	1.30575	1.26982	1.43307
Mki67ip	ENSMUSG00000026377	ENSMUST00000027626	1.16561	1.48176	1.70358	1.43295
Trub2	ENSMUSG00000039826	ENSMUST00000156846	0.92192	2.03648	1.56301	1.43168
Snx11	ENSMUSG00000020876	ENSMUST00000021246	1.66847	1.48122	1.18724	1.43161
2012-10-01	ENSMUSG00000026565	ENSMUST00000159212	1.0313	1.44954	1.96247	1.43155
Zfp568	ENSMUSG00000074221	ENSMUST00000146074	1.60217	1.45206	1.26064	1.4314
Zfp944	ENSMUSG00000033972	ENSMUST00000115535	1.31636	1.55154	1.43564	1.43129
Pdgfa	ENSMUSG00000025856	ENSMUST00000076095	1.1276	1.93471	1.34074	1.43012
Hdgf	ENSMUSG00000004897	ENSMUST00000162631	1.89313	1.44065	1.07142	1.42966
Ppp4r2	ENSMUSG00000052144	ENSMUST00000063854	1.21888	1.58416	1.51235	1.42935
Gm14139	ENSMUSG00000079009	ENSMUST00000109926	1.38204	1.49182	1.41629	1.42932
Tfam	ENSMUSG00000003923	ENSMUST00000145220	1.0828	1.56059	1.72738	1.42914
Bet1l	ENSMUSG00000025484	ENSMUST00000026557	2.71504	0.921276	1.16641	1.42891
Rnf166	ENSMUSG00000014470	ENSMUST00000014614	1.30514	1.68949	1.32127	1.42824
Sh3kbp1	ENSMUSG00000040990	ENSMUST00000080394	1.23782	1.78156	1.31884	1.42742
Nasp	ENSMUSG00000028693	uc008ugw.1	1.13729	1.45836	1.74661	1.42553
Trps1	ENSMUSG00000038679	ENSMUST00000165201	1.51537	1.33274	1.42914	1.42379
Ralgps2	ENSMUSG00000026594	uc007dcv.1	1.77995	1.326	1.22281	1.42376
Uspl1	ENSMUSG00000041264	ENSMUST00000150921	1.69401	1.06728	1.5959	1.42364
n/a	AK153849	uc008ozg.1	1.85424	1.23041	1.26412	1.42343
Tjap1	ENSMUSG00000012296	uc008csi.1	0.9101	2.26946	1.39056	1.42146
Zbtb6	ENSMUSG00000066798	ENSMUST00000053098	1.54936	1.46418	1.26449	1.42087
Cyb5d1	ENSMUSG00000044795	ENSMUST00000134903	1.24514	1.47195	1.5635	1.42038
Cnih	ENSMUSG00000015759	ENSMUST00000015903	1.00945	1.19871	2.36736	1.42022
Suv420h1	ENSMUSG00000045098	ENSMUST00000113972	1.23066	1.57073	1.48137	1.42004
Prkcc	ENSMUSG00000078816	uc009eut.1	1.31668	1.42492	1.52004	1.41811
Mad2l2	ENSMUSG00000029003	ENSMUST00000105707	1.42867	1.44918	1.37469	1.41716
Fnbp4	ENSMUSG00000008200	ENSMUST00000013759	2.11505	1.03181	1.3036	1.41695
Fanci	ENSMUSG00000039187	ENSMUST00000036865	1.11538	1.62736	1.56723	1.41692
Jarid1a	ENSMUSG00000030180	ENSMUST00000100996	1.4028	1.47378	1.37437	1.41637
Zfp59	ENSMUSG00000078779	uc009fxf.1	1.4782	1.49404	1.28624	1.41625
Ilf3	ENSMUSG00000032178	ENSMUST00000067646	1.24283	1.22069	1.86715	1.41492
A830080D01Rik	ENSMUSG00000044150	ENSMUST00000112464	1.05541	1.74427	1.53872	1.41492
AB013468	ENSMUSG00000003269	ENSMUST00000107726	1.18547	1.6751	1.42608	1.41479
Zbtb41	ENSMUSG00000033964	ENSMUST00000039867	1.5035	1.44611	1.3023	1.41473
Tmem38b	ENSMUSG00000028420	ENSMUST00000030127	1.07645	1.63684	1.60632	1.41452
Def8	ENSMUSG00000001482	ENSMUST00000108832	0.958513	1.34977	2.18406	1.41375
Pfkfb2	ENSMUSG00000026409	ENSMUST00000050406	1.79937	1.4344	1.09456	1.41366
Vps35	ENSMUSG00000031696	uc009mpo.1	1.8584	1.22929	1.23612	1.41346
Polr1d	ENSMUSG00000029642	ENSMUST00000110557	1.26361	1.7905	1.24727	1.41313
Adsl	ENSMUSG00000022407	ENSMUST00000166711	1.88304	1.54169	0.970945	1.41259
Phf20	ENSMUSG00000038116	uc008nmy.1	1.06068	1.47936	1.79404	1.41199
Zfp772	ENSMUSG00000066838	uc009fcl.1	1.32434	1.3066	1.62175	1.41051
Rassf3	ENSMUSG00000025795	ENSMUST00000026902	1.12553	1.70535	1.46203	1.41051
Spsb3	ENSMUSG00000024160	ENSMUST00000024976	1.79592	1.12969	1.38312	1.41049
Prpf18	ENSMUSG00000039449	ENSMUST00000035721	1.18853	1.46899	1.60587	1.41009
Giyd1	ENSMUSG00000059772	ENSMUST00000155012	1.39322	1.39785	1.43812	1.40959
Pggt1b	ENSMUSG00000024477	ENSMUST00000025354	1.53809	1.48067	1.22948	1.40946
Dtymk	ENSMUSG00000026281	ENSMUST00000112893	1.26993	1.8197	1.21131	1.40933
Vegfc	ENSMUSG00000031520	ENSMUST00000033919	2.23006	1.30571	0.959297	1.40833
Prosc	ENSMUSG00000031485	uc009lhv.1	1.45244	1.3123	1.46304	1.40755
Capsl	ENSMUSG00000039676	ENSMUST00000042360	0.972917	1.62669	1.76137	1.40738
Ing3	ENSMUSG00000029670	ENSMUST00000115389	1.3855	1.28185	1.56569	1.40621
Abhd10	ENSMUSG00000033157	ENSMUST00000066983	1.51752	1.88825	0.970227	1.40612
BC005537	ENSMUSG00000019132	ENSMUST00000019276	1.29869	1.69152	1.26536	1.40604
n/a	BC063263	uc009gmb.1	1.01831	1.60875	1.69599	1.40583
5730455P16Rik	ENSMUSG00000057181	ENSMUST00000103225	1.29047	1.46639	1.46596	1.4051
Brd8	ENSMUSG00000003778	ENSMUST00000152612	1.51059	1.27358	1.44156	1.40498
lig-2a	ENSMUSG00000042520	ENSMUST00000090908	1.02902	2.27801	1.18257	1.40476
Rif1	ENSMUSG00000036202	uc008jqr.1	1.56737	1.40161	1.26161	1.40467
Prc1	ENSMUSG00000038943	ENSMUST00000047549	1.32052	1.58054	1.32775	1.40461
Impa2	ENSMUSG00000024525	ENSMUST00000025403	1.20668	1.50425	1.52612	1.40443
Psmc4	ENSMUSG00000030603	ENSMUST00000138512	1.10001	2.0271	1.23816	1.40287
Peo1	ENSMUSG00000025209	uc008hqj.1	1.37551	1.43963	1.3938	1.40272
Clk1	ENSMUSG00000026034	ENSMUST00000129577	1.29364	1.58576	1.34439	1.40236
Bod1	ENSMUSG00000044502	uc007iim.1	1.85474	1.45066	1.02498	1.40235
Kifc3	ENSMUSG00000031788	ENSMUST00000169748	1.00417	1.36727	2.00702	1.40197
Safb	ENSMUSG00000071054	uc008dck.1	1.30509	1.31835	1.60043	1.40164
Clcn6	ENSMUSG00000029016	ENSMUST00000137724	2.16281	1.26704	1.00426	1.40137
Ddx3x	ENSMUSG00000069045	ENSMUST00000091190	0.971698	1.98828	1.42397	1.40121
Thoc3	ENSMUSG00000025872	ENSMUST00000026990	1.5228	1.3299	1.35742	1.40085
Sec22b	ENSMUSG00000027879	ENSMUST00000029476	1.09133	1.58914	1.58232	1.40003
Hltf	ENSMUSG00000002428	uc008osm.1	1.56957	1.19515	1.46063	1.39931
Ascc2	ENSMUSG00000020412	ENSMUST00000109930	1.24179	1.65836	1.32985	1.39909
Id4	ENSMUSG00000021379	ENSMUST00000021810	1.89894	1.20863	1.19092	1.39818
9130011E15Rik	ENSMUSG00000039901	ENSMUST00000045396	1.25563	1.75278	1.23975	1.39736
Anapc10	ENSMUSG00000036977	uc009miw.1	0.999243	1.50536	1.81145	1.39673
Nop58	ENSMUSG00000026020	ENSMUST00000027174	1.90902	1.01141	1.41032	1.39643
n/a	ENSMUSG00000071372	uc007nda.1	1.09283	1.55637	1.60086	1.39639
Fsd1l	ENSMUSG00000054752	ENSMUST00000132151	1.7955	1.32038	1.14624	1.39546
Foxj3	ENSMUSG00000032998	ENSMUST00000106310	1.59683	1.51158	1.12563	1.39539
Arv1	ENSMUSG00000031982	ENSMUST00000034463	1.84896	1.06401	1.37966	1.39492
n/a	ENSMUSG00000020631	uc007myu.1	1.71096	1.2154	1.30425	1.39457
Zmym2	ENSMUSG00000021945	uc007uct.1	1.64865	1.45883	1.12669	1.39416
2700029M09Rik	ENSMUSG00000038005	ENSMUST00000136098	1.51144	1.31619	1.36053	1.39361
Trp53i13	ENSMUSG00000044328	ENSMUST00000060417	1.21411	1.25575	1.7752	1.3936
Eif5a	ENSMUSG00000078812	ENSMUST00000164359	1.16327	1.32841	1.74561	1.39205
Aifm2	ENSMUSG00000020085	ENSMUST00000099706	0.98039	1.55994	1.76376	1.39203
Ddx52	ENSMUSG00000020677	ENSMUST00000049257	1.58024	1.43552	1.1884	1.39176
Bag5	ENSMUSG00000049792	ENSMUST00000054636	1.54744	1.43568	1.21204	1.39122
Tmed1	ENSMUSG00000032180	ENSMUST00000098951	1.38611	1.60176	1.21208	1.39094
mKIAA0092	ENSMUSG00000031922	ENSMUST00000147115	1.19105	1.28294	1.75748	1.38998
Pyroxd1	ENSMUSG00000041671	ENSMUST00000041852	1.20235	1.5683	1.42384	1.38987
pcm-1	ENSMUSG00000031592	ENSMUST00000045199	1.33055	1.22743	1.64284	1.38955
Stk31	ENSMUSG00000023403	ENSMUST00000024171	0.986314	1.86247	1.45924	1.38913
Park7	ENSMUSG00000028964	ENSMUST00000105675	1.17769	1.25086	1.81949	1.38909
Mtmr2	ENSMUSG00000031918	ENSMUST00000155679	1.70247	1.01582	1.54856	1.3887
Ccdc25	ENSMUSG00000022035	ENSMUST00000022614	1.13126	1.51926	1.55019	1.38631
B3gnt7	ENSMUSG00000079445	uc007bvk.1	1.85073	1.39668	1.03025	1.3861
Asxl1	ENSMUSG00000042548	ENSMUST00000036193	1.98459	1.0699	1.25177	1.3852
Ccdc76	ENSMUSG00000033439	ENSMUST00000128687	1.63975	1.23318	1.31335	1.38482
Sap30bp	ENSMUSG00000020755	ENSMUST00000140991	1.62642	1.45303	1.12353	1.38473
Papola	ENSMUSG00000021111	ENSMUST00000169938	1.25958	1.43963	1.46402	1.38465
Ormdl1	ENSMUSG00000026097	ENSMUST00000027266	1.31983	1.51023	1.33187	1.38465
Wapal	ENSMUSG00000041408	ENSMUST00000090027	1.58747	1.39384	1.19964	1.3846
Atad2	ENSMUSG00000022360	uc007vtg.1	1.44296	1.20637	1.52378	1.38426
Zfp568	ENSMUSG00000074221	uc009gcv.1	1.7533	1.20708	1.25284	1.38408
Mecp2	ENSMUSG00000031393	ENSMUST00000033770	1.38163	1.24682	1.53708	1.38345
Alkbh8	ENSMUSG00000025899	uc009oaw.1	1.79561	1.11307	1.32024	1.38186
5830418K08Rik	ENSMUSG00000046111	uc009ofx.1	1.55906	1.02015	1.65831	1.38165
Arih2	ENSMUSG00000064145	uc009rqp.1	1.42018	1.37827	1.34567	1.38104
Cdc25a	ENSMUSG00000032477	uc009rsw.1	1.6989	1.22404	1.26657	1.38101
Pmel	ENSMUSG00000025359	ENSMUST00000054125	1.25388	1.69395	1.23894	1.3806
Bcl7b	ENSMUSG00000029681	ENSMUST00000031692	2.09769	1.22247	1.02514	1.38013
Face-2	ENSMUSG00000024889	uc008gaj.1	1.56342	1.18942	1.41166	1.37948
Zfyve1	ENSMUSG00000042628	uc007odh.1	1.55642	1.61749	1.04142	1.3789
Bclaf1	ENSMUSG00000037608	ENSMUST00000043881	1.81916	1.32584	1.08606	1.3785
Ralgapb	ENSMUSG00000027652	ENSMUST00000109485	1.3571	1.17801	1.63782	1.37829
Dcp1a	ENSMUSG00000021962	ENSMUST00000022535	1.51967	1.2319	1.3976	1.37796
Zfp599	ENSMUSG00000062794	ENSMUST00000086281	1.8477	1.21547	1.16429	1.37767
Zfp866	ENSMUSG00000043090	uc009lxq.1	1.7728	0.971912	1.51496	1.37688
Armc8	ENSMUSG00000032468	uc009reh.1	0.97331	2.04608	1.31054	1.37681
Cnot1	ENSMUSG00000036550	ENSMUST00000068452	1.15646	1.14105	1.97574	1.37633
n/a	AK161843	uc008byh.1	1.93207	1.17791	1.14527	1.3762
BC017647	ENSMUSG00000037750	uc007kid.1	1.5867	1.21858	1.3456	1.37538
Parp6	ENSMUSG00000025237	ENSMUST00000050483	1.48322	1.50634	1.16395	1.37517
5730507C01Rik	ENSMUSG00000073197	uc007ndb.1	1.1173	1.42092	1.63769	1.37507
Glb1	ENSMUSG00000045594	uc009rxm.1	1.05739	1.98633	1.2354	1.37414
Lage3	ENSMUSG00000015289	ENSMUST00000114152	1.38607	1.22342	1.52994	1.37408
Gpbp1	ENSMUSG00000032745	ENSMUST00000136471	1.98597	1.22891	1.06272	1.37395
Syap1	ENSMUSG00000031357	uc009uun.1	1.20278	1.66311	1.29632	1.37385
Nxt1	ENSMUSG00000036992	ENSMUST00000047177	1.46428	1.53564	1.15155	1.3732
Mid1ip1	ENSMUSG00000008035	ENSMUST00000008179	1.56884	1.35604	1.21542	1.37254
2700094K13Rik	ENSMUSG00000076437	ENSMUST00000102646	0.996437	2.15921	1.20145	1.37241
Map2k2	ENSMUSG00000035027	ENSMUST00000143517	0.992978	2.00553	1.29777	1.37232
Zbed6	ENSMUSG00000026464	uc007cqr.1	1.26283	1.3945	1.4668	1.37207
Gapvd1	ENSMUSG00000026867	ENSMUST00000028224	1.45688	0.970079	1.82712	1.37193
Awp1	ENSMUSG00000030629	ENSMUST00000069537	1.01454	1.43682	1.77136	1.37191
Ufd1l	ENSMUSG00000005262	ENSMUST00000005394	0.94202	1.33492	2.05312	1.37186
Pla2g4b	ENSMUSG00000033852	ENSMUST00000044675	1.68298	1.26206	1.21365	1.37115
Fam48a	ENSMUSG00000027751	uc008pfp.1	1.37272	1.46359	1.28273	1.37102
Ankle2	ENSMUSG00000029501	uc008yqf.1	1.27854	1.29575	1.55348	1.3704
Kdm4c	ENSMUSG00000028397	uc008tjj.1	1.31255	1.2359	1.58566	1.37015
Stk38	ENSMUSG00000024006	ENSMUST00000009138	1.32844	1.83484	1.05503	1.37005
Syvn1	ENSMUSG00000024807	uc008ggn.1	2.01077	1.10009	1.16059	1.36927
Hnrnpa1	ENSMUSG00000021585	ENSMUST00000163477	1.26529	1.64135	1.23584	1.36915
Tmed7	ENSMUSG00000033184	uc008evr.1	1.11401	1.58264	1.45497	1.36891
Ccnc	ENSMUSG00000028252	ENSMUST00000102997	1.12559	1.33231	1.70829	1.3683
Zfp113	ENSMUSG00000037007	ENSMUST00000049393	1.7929	1.38474	1.03139	1.3681
Paf1	ENSMUSG00000003437	ENSMUST00000003529	1.24539	1.15626	1.77748	1.3679
Uty	ENSMUSG00000068457	ENSMUST00000154004	1.84821	1.27914	1.08228	1.36774
Jam2	ENSMUSG00000053062	ENSMUST00000114195	1.02195	1.63512	1.53066	1.36758
Eif4e2	ENSMUSG00000026254	ENSMUST00000076362	1.56846	1.33872	1.21771	1.36742
Usp22	ENSMUSG00000042506	ENSMUST00000041683	1.00928	1.67544	1.50798	1.36619
Nr2c1	ENSMUSG00000005897	ENSMUST00000105290	2.0294	1.16653	1.07624	1.36581
Zfx	ENSMUSG00000079509	ENSMUST00000170652	1.7963	1.19705	1.18401	1.36547
Dzip3	ENSMUSG00000064061	uc007zjy.1	1.19323	1.57056	1.35809	1.36532
Prr14	ENSMUSG00000030822	ENSMUST00000033095	1.95882	1.02584	1.26618	1.36518
Yy1	ENSMUSG00000021264	ENSMUST00000084993	1.44461	1.39715	1.26048	1.36514
Usp30	ENSMUSG00000029592	ENSMUST00000031588	1.67197	1.16503	1.30601	1.36512
n/a	ENSMUSG00000060149	uc008aoy.1	1.73401	1.04024	1.40764	1.36424
Triml2	ENSMUSG00000091490	ENSMUST00000163869	1.66298	1.39768	1.09136	1.36381
4930452B06Rik	ENSMUSG00000021747	ENSMUST00000102996	1.21287	1.55015	1.34746	1.36323
Arhgap11a	ENSMUSG00000041219	ENSMUST00000110949	1.03834	1.31489	1.85374	1.36278
Crkl	ENSMUSG00000006134	ENSMUST00000006293	1.76891	1.18496	1.20573	1.36213
Msl2	ENSMUSG00000066415	ENSMUST00000085177	1.19495	1.64494	1.28564	1.36209
Pank2	ENSMUSG00000037514	ENSMUST00000103185	1.67675	1.32218	1.13945	1.36192
Polr1a	ENSMUSG00000049553	uc009chw.1	0.996339	1.25538	2.01957	1.36191
Anapc16	ENSMUSG00000020107	ENSMUST00000020307	1.18526	1.76618	1.20587	1.3616
Zfp955a	ENSMUSG00000008686	uc008byf.1	1.71002	1.13596	1.29711	1.36076
Ubr3	ENSMUSG00000044308	ENSMUST00000055758	1.31134	1.4916	1.2865	1.36017
Slc25a20	ENSMUSG00000032602	ENSMUST00000035222	1.0179	1.64547	1.50208	1.36007
Lnp	ENSMUSG00000009207	ENSMUST00000064503	0.977822	1.27066	2.02471	1.36004
Dhdh	ENSMUSG00000011382	ENSMUST00000011526	0.941257	1.93774	1.37862	1.35982
Esco1	ENSMUSG00000024293	uc008eau.1	1.60853	1.3595	1.14953	1.3597
6720489N17Rik	ENSMUSG00000074865	uc007qxa.1	1.3237	1.3253	1.43242	1.35954
Tk2	ENSMUSG00000035824	uc009nab.1	2.03626	0.96681	1.27584	1.35933
Mysm1	ENSMUSG00000062627	ENSMUST00000075872	1.11038	1.68258	1.34293	1.35883
Srsf11	ENSMUSG00000055436	ENSMUSG00000055436:poison4	0.975784	1.53743	1.66999	1.35817
Ccnt2	ENSMUSG00000026349	uc007ckx.1	2.05643	0.999499	1.21723	1.35755
AI467606	ENSMUSG00000045165	ENSMUST00000056288	1.61948	1.26146	1.22163	1.35643
Hnrnpc	ENSMUSG00000060373	uc007tod.1	1.86946	0.922345	1.44673	1.35623
Ddi2	ENSMUSG00000078515	ENSMUST00000102484	1.12426	1.76469	1.25694	1.35607
Gm14435	ENSMUSG00000089951	ENSMUST00000108995	1.38859	1.31069	1.36816	1.35541
Zfp62	ENSMUSG00000046311	uc007ipx.1	1.44152	1.41183	1.22236	1.35498
Dyrk1a	ENSMUSG00000022897	uc008abh.1	1.52015	1.37549	1.18971	1.35497
Bub1	ENSMUSG00000027379	uc008mgd.1	1.19579	1.44085	1.44178	1.35433
Mpzl1	ENSMUSG00000026566	ENSMUST00000068705	1.31167	1.15308	1.64047	1.35379
Tfdp2	ENSMUSG00000032411	uc009rci.1	1.93249	1.03576	1.2394	1.35372
Usp48	ENSMUSG00000043411	ENSMUST00000105840	1.23065	1.37933	1.45952	1.35313
Grsf1	ENSMUSG00000044221	uc008yab.1	1.07654	1.10358	2.08428	1.3529
Siah1b	ENSMUSG00000040749	ENSMUST00000071667	1.71558	1.23846	1.16332	1.35207
Azin1	ENSMUSG00000037458	ENSMUST00000065308	1.06888	1.716	1.3455	1.35138
Smarcad1	ENSMUSG00000029920	uc009cec.1	1.25543	1.27257	1.54341	1.35099
Cpsf7	ENSMUSG00000034820	uc008gqa.1	1.17879	1.33212	1.56931	1.35071
Smarca5	ENSMUSG00000031715	ENSMUST00000043359	1.31893	1.21695	1.53486	1.35058
Ap1g1	ENSMUSG00000031731	ENSMUST00000093157	1.15216	1.3372	1.59667	1.34992
Cnbp	ENSMUSG00000030057	uc009cuc.1	1.12623	1.45395	1.50154	1.3497
Abhd4	ENSMUSG00000040997	uc007tvo.1	1.25855	1.61485	1.20971	1.34967
AK172190	ENSMUSG00000035696	ENSMUST00000148869	1.00353	1.52779	1.60325	1.34958
BC027231	ENSMUSG00000036208	uc007zho.1	1.5398	1.2113	1.31377	1.34817
Zfp91	ENSMUSG00000024695	uc008gup.1	1.46829	1.21915	1.36838	1.34801
Sf3a1	ENSMUSG00000002129	ENSMUST00000002198	1.29202	1.34766	1.40622	1.34783
EG630579	ENSMUSG00000074867	uc007qws.1	1.14272	1.40689	1.5219	1.3475
Tmbim6	ENSMUSG00000023010	ENSMUST00000023749	1.00734	1.22951	1.97302	1.34694
Stoml1	ENSMUSG00000032333	ENSMUST00000034883	1.52772	1.58368	1.00901	1.34649
Rab23	ENSMUSG00000004768	ENSMUST00000115174	1.47035	1.31192	1.26499	1.34629
Dnajc4	ENSMUSG00000024963	ENSMUST00000025915	1.93765	1.04335	1.20547	1.34572
Nisch	ENSMUSG00000021910	ENSMUST00000172142	1.12721	1.73408	1.24622	1.34552
Kptn	ENSMUSG00000006021	ENSMUST00000006178	0.979187	1.357	1.83292	1.34544
Morc	ENSMUSG00000022652	ENSMUST00000023330	1.00465	1.63003	1.48608	1.34509
Mrpl47	ENSMUSG00000037531	ENSMUST00000043966	1.54277	1.46516	1.07661	1.34508
Zcchc7	ENSMUSG00000035649	ENSMUST00000107824	1.46741	1.51616	1.09291	1.3447
Mtrr	ENSMUSG00000034617	ENSMUST00000168523	1.27008	1.19308	1.60307	1.34426
BC099953	ENSMUSG00000078879	ENSMUST00000108985	1.39863	1.2734	1.36384	1.34424
Pttg1	ENSMUSG00000020415	ENSMUST00000118368	0.920622	1.80748	1.45969	1.34422
Prepl	ENSMUSG00000024127	uc008dtr.1	1.24849	1.12042	1.73577	1.34406
LOC100504473	ENSMUSG00000069769	ENSMUST00000163778	1.34355	1.41492	1.27697	1.34397
AK008833	ENSMUSG00000078546	ENSMUST00000106026	1.43176	1.28222	1.31968	1.34307
4933437F05Rik	ENSMUSG00000072919	uc007oio.1	1.75954	1.33407	1.03176	1.34293
Gm13157	ENSMUSG00000078495	ENSMUST00000105734	1.41104	1.25019	1.37185	1.34258
Tmem41b	ENSMUSG00000047554	ENSMUST00000119929	1.23256	1.33431	1.47061	1.34231
Tprkb	ENSMUSG00000054226	ENSMUST00000067137	1.10329	1.51337	1.44824	1.34222
Tmx3	ENSMUSG00000024614	uc008fvt.1	1.23473	1.13648	1.72192	1.34189
2210009G21Rik	ENSMUSG00000027281	ENSMUST00000099311	1.29936	1.51839	1.22409	1.34166
Adipor2	ENSMUSG00000030168	ENSMUST00000032272	1.17852	1.6155	1.26844	1.34165
Setx	ENSMUSG00000043535	ENSMUST00000061578	1.03119	1.65941	1.41049	1.34139
2610020H08Rik	ENSMUSG00000030924	ENSMUST00000106520	1.28741	1.39141	1.34723	1.34134
D19Ertd737e	ENSMUSG00000057858	ENSMUST00000065286	1.02672	1.32312	1.77372	1.34064
Ahctf1	ENSMUSG00000026491	ENSMUST00000027768	1.1234	1.50469	1.42362	1.34006
Polr2d	ENSMUSG00000024258	uc008eim.1	1.16461	1.44161	1.43329	1.34005
H3f3b	ENSMUSG00000060743	ENSMUST00000159441	1.18967	1.50277	1.34475	1.33963
8430406I07Rik	ENSMUSG00000027424	ENSMUST00000110027	1.45858	1.44303	1.14187	1.3395
Mms22l	ENSMUSG00000045751	ENSMUST00000098233	2.01824	1.23641	0.962276	1.33909
Rmi1	ENSMUSG00000035367	uc007quc.1	0.925338	1.41893	1.82534	1.33824
Asxl2	ENSMUSG00000037486	ENSMUST00000111215	1.59853	1.22542	1.22325	1.33816
AK007605	ENSMUSG00000021302	uc007pmu.1	1.38381	1.32437	1.30656	1.33784
Polr2a	ENSMUSG00000005198	ENSMUST00000058470	1.32809	1.50681	1.19616	1.3377
Fastkd5	ENSMUSG00000079043	uc008mjl.1	1.33471	1.03699	1.72853	1.33745
AK041465	ENSMUSG00000073664	ENSMUST00000160834	1.14945	1.50242	1.38125	1.33614
Ythdc1	ENSMUSG00000035851	ENSMUST00000151489	1.01901	1.38553	1.68885	1.33596
Dhfr	ENSMUSG00000021707	ENSMUST00000022218	1.20263	1.46603	1.3502	1.33523
Zc3h7a	ENSMUSG00000037965	uc007yez.1	1.39068	1.35868	1.25853	1.33476
Tmx2	ENSMUSG00000050043	ENSMUST00000111664	1.16689	1.16857	1.74324	1.33459
Akap2	ENSMUSG00000038729	ENSMUST00000102903	1.70544	1.50481	0.92601	1.33448
Spopl	ENSMUSG00000026771	ENSMUST00000132484	1.27944	1.49612	1.24022	1.33402
Spen	ENSMUSG00000040761	uc008voq.1	1.18465	1.51263	1.32436	1.33386
Tarbp2	ENSMUSG00000023051	ENSMUST00000154948	1.41281	0.956376	1.75133	1.33258
Ccdc15	ENSMUSG00000034303	ENSMUST00000037275	1.20629	1.53363	1.27839	1.33233
2012-03-07	ENSMUSG00000026977	ENSMUST00000102748	1.09338	1.44389	1.49775	1.33224
Prdm2	ENSMUSG00000057637	uc008vpz.1	1.36222	1.19105	1.45539	1.33163
Fam118a	ENSMUSG00000022434	uc007xcv.1	1.2544	1.47185	1.2773	1.33106
Nfkb2	ENSMUSG00000025225	uc008hsy.1	1.9347	1.26527	0.963068	1.33092
Tmed4	ENSMUSG00000004394	ENSMUST00000004508	1.31636	1.20001	1.49153	1.33065
Plekhf2	ENSMUSG00000049969	ENSMUST00000054776	1.08703	1.31867	1.64314	1.33051
1110037F02Rik	ENSMUSG00000040720	ENSMUST00000055372	2.01219	0.911796	1.28361	1.33046
Arhgap11a	ENSMUSG00000041219	uc008lpr.1	1.15307	1.35322	1.50773	1.32999
3110001I22Rik	ENSMUSG00000079737	ENSMUST00000035426	1.38655	1.2874	1.31754	1.32985
AI848100	ENSMUSG00000040297	ENSMUST00000048377	1.4584	1.32307	1.21818	1.32961
Brf2	ENSMUSG00000031487	ENSMUST00000033877	1.55996	1.19187	1.2627	1.32907
Mgea5	ENSMUSG00000025220	uc008hrm.1	1.2133	1.28	1.51144	1.32899
Neil1	ENSMUSG00000032298	ENSMUST00000098692	1.31272	1.31707	1.35718	1.32884
Hdac1	ENSMUSG00000028800	ENSMUST00000139305	1.40779	1.59887	1.04135	1.32836
Mier1	ENSMUSG00000028522	uc008txf.1	1.11193	1.3856	1.52084	1.32821
Gm14308	ENSMUSG00000078897	uc008ofs.1	1.11181	1.33588	1.57744	1.32816
Ddx5	ENSMUSG00000020719	ENSMUST00000133426	1.12508	1.50946	1.37647	1.32716
Gm505	ENSMUSG00000031986	ENSMUST00000034467	1.57566	1.02984	1.43989	1.32695
n/a	ENSMUSG00000091594	ENSMUST00000166837	1.00397	1.48199	1.56794	1.32627
Ubc	ENSMUSG00000008348	uc008zrg.1	1.6618	1.35754	1.0327	1.32567
Pus3	ENSMUSG00000032103	ENSMUST00000135768	1.27428	1.27697	1.43006	1.32515
Frrs1	ENSMUSG00000033386	uc008rcv.1	1.24979	1.13161	1.64287	1.32448
Blzf1	ENSMUSG00000026577	ENSMUST00000086032	1.52397	1.2794	1.1909	1.32419
Thoc1	ENSMUSG00000024287	uc008eam.1	1.47966	1.22307	1.2822	1.3239
Stk17b	ENSMUSG00000026094	ENSMUST00000027263	1.48612	1.37262	1.13699	1.32369
Gen1	ENSMUSG00000051235	ENSMUST00000052581	1.65283	1.41755	0.989242	1.32339
0610010B08Rik	ENSMUSG00000078881	uc008ogo.1	1.10851	1.32964	1.5721	1.32328
Raf1	ENSMUSG00000000441	uc009diz.1	1.24057	1.22876	1.51811	1.32271
Usp24	ENSMUSG00000028514	ENSMUST00000094933	1.33611	1.34328	1.28923	1.32266
Psmd6	ENSMUSG00000021737	ENSMUST00000147471	1.44027	1.44682	1.10946	1.32228
Vcpip1	ENSMUSG00000045210	ENSMUST00000057438	1.28599	1.42934	1.25758	1.32222
Nudt9	ENSMUSG00000029310	ENSMUST00000031250	1.13096	1.18816	1.71753	1.32153
Naa38	ENSMUSG00000044155	ENSMUST00000056398	1.16957	1.02462	1.92579	1.3215
Ensa	ENSMUSG00000038619	ENSMUST00000037983	1.21301	1.42955	1.33085	1.32149
Synrg	ENSMUSG00000034940	ENSMUST00000148901	1.08994	1.57065	1.34697	1.32113
Ube2k	ENSMUSG00000029203	uc008xnu.1	1.64387	1.05605	1.3275	1.32088
B4galt7	ENSMUSG00000021504	ENSMUST00000064701	1.29638	1.53838	1.15301	1.31991
Ubr3	ENSMUSG00000044308	ENSMUST00000112251	1.40572	1.35919	1.20203	1.31937
Ubc	ENSMUSG00000008348	uc008zrh.1	1.56001	1.44426	1.01925	1.31933
0610030E20Rik	ENSMUSG00000058706	ENSMUST00000077783	1.15058	1.47242	1.35516	1.3192
Znrd1	ENSMUSG00000036315	ENSMUST00000113669	1.34983	0.956283	1.77793	1.31905
Ufl1	ENSMUSG00000040359	ENSMUST00000102994	1.12161	1.18689	1.72349	1.31893
Gorab	ENSMUSG00000040124	ENSMUST00000045138	1.46748	1.23756	1.2624	1.31859
Zfp821	ENSMUSG00000031728	uc009njb.1	1.93152	1.22808	0.965809	1.31827
Pcyt1a	ENSMUSG00000005615	ENSMUST00000079791	1.42759	1.50371	1.06717	1.31826
Dsn1	ENSMUSG00000027635	ENSMUST00000103129	1.34275	1.24714	1.3679	1.31822
Rabep1	ENSMUSG00000020817	ENSMUST00000076270	1.63516	1.33555	1.04887	1.3182
Ncapg	ENSMUSG00000015880	ENSMUST00000134309	1.19951	1.31751	1.44784	1.31773
Whamm	ENSMUSG00000045795	uc009ice.1	1.93185	0.992687	1.19105	1.31696
Ska3	ENSMUSG00000021965	ENSMUST00000022536	1.14729	1.42923	1.39198	1.31665
Ubl5	ENSMUSG00000084786	ENSMUST00000162303	1.10738	2.19869	0.936728	1.31631
AK037193	ENSMUSG00000056211	ENSMUST00000036288	1.3379	1.38889	1.22677	1.31609
Serac1	ENSMUSG00000015659	uc008afx.1	1.3166	1.46377	1.18268	1.31603
A130022J15Rik	ENSMUSG00000035245	ENSMUST00000054344	1.49717	1.26091	1.20672	1.31579
Cdk9	ENSMUSG00000009555	uc008jgo.1	1.32469	1.40909	1.21918	1.31535
Hnrnpf	ENSMUSG00000042079	ENSMUST00000167182	0.938555	1.69987	1.42469	1.31482
Rnf4	ENSMUSG00000029110	uc008xcd.1	1.32771	1.33847	1.27889	1.31477
Nipbl	ENSMUSG00000022141	uc007ver.1	1.56373	1.30001	1.11725	1.31448
Dhx15	ENSMUSG00000029169	uc008xkh.1	1.10815	1.34764	1.52076	1.31445
Zfp143	ENSMUSG00000061079	uc009jew.1	1.36292	1.02085	1.63088	1.31407
Tmem55b	ENSMUSG00000035953	ENSMUST00000163088	1.20078	1.86919	1.0109	1.31404
Mtmr12	ENSMUSG00000039458	ENSMUST00000038172	1.01832	1.42971	1.55834	1.31401
Chd1	ENSMUSG00000023852	uc008aov.1	1.02229	1.45292	1.52743	1.31399
Rnh1	ENSMUSG00000038650	uc009kjt.1	1.53834	1.09652	1.34434	1.31379
2010305A19Rik	ENSMUSG00000048351	ENSMUST00000131656	1.19215	1.40309	1.35506	1.31358
Gm14308	ENSMUSG00000078888	uc008ogb.1	1.10259	1.32551	1.54802	1.31278
Sv2a	ENSMUSG00000038486	ENSMUST00000035371	1.45291	1.04675	1.4876	1.31277
Ccdc86	ENSMUSG00000024732	ENSMUST00000025639	1.69265	1.11889	1.1932	1.31227
Rbm4b	ENSMUSG00000033760	uc008gaq.1	1.27742	1.16695	1.51119	1.31089
Rbbp5	ENSMUSG00000026439	ENSMUST00000027700	1.34965	1.24155	1.34286	1.31041
Strbp	ENSMUSG00000026915	ENSMUST00000072186	1.01728	1.53059	1.44489	1.31032
AK161769	ENSMUSG00000073403	uc008ckj.1	1.72145	1.43003	0.912347	1.30958
Tiparp	ENSMUSG00000034640	ENSMUST00000047906	1.35661	1.18715	1.39441	1.30953
BC027344	ENSMUSG00000050855	ENSMUST00000085792	1.3014	1.20173	1.43552	1.30941
mKIAA1217	ENSMUSG00000036617	ENSMUST00000114606	1.00153	1.32949	1.68593	1.30937
3830431G21Rik	ENSMUSG00000066438	uc007obg.1	1.19367	1.07538	1.74363	1.30808
Lsm14a	ENSMUSG00000066568	ENSMUST00000085585	1.29147	1.06177	1.62925	1.30727
Polr1a	ENSMUSG00000049553	uc009chv.1	1.02002	1.64314	1.33264	1.30717
Rpl5	ENSMUSG00000058558	ENSMUST00000123183	0.927058	1.33583	1.8027	1.30695
Spag5	ENSMUSG00000002055	ENSMUST00000045026	1.30858	1.37298	1.24143	1.30656
Myst4	ENSMUSG00000021767	uc007slg.1	1.52592	1.277	1.14421	1.3064
Scfd2	ENSMUSG00000062110	uc008xtk.1	1.30184	1.28497	1.33229	1.30622
Fam98a	ENSMUSG00000002017	uc008dor.1	1.64701	1.01135	1.33696	1.30588
Zfc3h1	ENSMUSG00000034163	ENSMUST00000036044	1.13887	1.12778	1.7329	1.30564
Inppl1	ENSMUSG00000032737	ENSMUST00000035836	1.39355	0.989841	1.61273	1.30542
Gpr107	ENSMUSG00000000194	ENSMUST00000056433	1.18749	1.61301	1.16117	1.30533
AK134400	ENSMUSG00000032712	ENSMUST00000046689	1.91521	1.25404	0.923091	1.30394
Rab8a	ENSMUSG00000003037	ENSMUST00000098631	1.07054	1.52111	1.36134	1.3039
Arip2	ENSMUSG00000091803	ENSMUST00000002757	1.47705	0.975901	1.53785	1.30388
AK166773	ENSMUSG00000090093	ENSMUST00000109062	1.47516	1.15185	1.30216	1.30307
Ctdspl2	ENSMUSG00000033411	ENSMUST00000110578	1.75512	1.15067	1.09484	1.30278
Paip2b	ENSMUSG00000045896	ENSMUST00000058383	1.03213	1.1986	1.78644	1.30256
Hars2	ENSMUSG00000019143	ENSMUST00000019287	1.6896	1.24899	1.04715	1.30252
Mphosph9	ENSMUSG00000038126	uc008zpg.1	1.15218	1.40759	1.3614	1.30215
2810407C02Rik	ENSMUSG00000075700	uc008phx.1	1.61848	1.08218	1.25703	1.30092
Tle1	ENSMUSG00000024642	ENSMUST00000052011	1.52316	1.14362	1.2608	1.29984
Atg10	ENSMUSG00000021619	ENSMUST00000022119	1.19132	1.46683	1.25553	1.2994
Trim33	ENSMUSG00000033014	uc008qsx.1	1.50465	1.26169	1.15545	1.29931
Derl2	ENSMUSG00000018442	ENSMUST00000171041	1.62752	1.43513	0.93896	1.29924
Gm14308	ENSMUSG00000078880	uc008ogq.1	1.11176	1.30304	1.50976	1.29805
Gng2	ENSMUSG00000043004	uc007siw.1	0.984551	1.78195	1.24615	1.29788
mKIAA1835	ENSMUSG00000022391	uc007wxc.1	1.23004	1.22894	1.44603	1.2978
Upf3b	ENSMUSG00000036572	ENSMUST00000076265	0.974412	1.4091	1.59061	1.29743
Pcnt	ENSMUSG00000001151	ENSMUST00000171940	1.36292	1.23037	1.30225	1.29738
Awp1	ENSMUSG00000030629	uc009iel.1	1.04592	1.44238	1.44593	1.29691
n/a	BC064812	uc007gjf.1	1.61416	1.06299	1.27087	1.29676
Pds5b	ENSMUSG00000034021	ENSMUST00000038900	0.948599	1.37882	1.66622	1.29651
Camk2g	ENSMUSG00000021820	ENSMUST00000100837	1.64412	1.20134	1.10324	1.29645
Sf3b3	ENSMUSG00000033732	uc009nlc.1	1.34215	1.21117	1.34017	1.29635
Capzb	ENSMUSG00000028745	ENSMUST00000030518	1.00979	1.35239	1.59507	1.29629
Tjap1	ENSMUSG00000012296	ENSMUST00000164342	1.23768	1.41073	1.24638	1.29588
Ptcd1	ENSMUSG00000029624	ENSMUST00000031628	1.59515	1.07912	1.26369	1.2957
AK037090	ENSMUSG00000025147	ENSMUST00000084418	1.41349	1.47641	1.04139	1.2953
Cdk9	ENSMUSG00000009555	ENSMUST00000125058	1.45148	1.57217	0.952211	1.29523
Dsg2	ENSMUSG00000044393	ENSMUST00000059787	1.13205	1.38791	1.38259	1.29511
Peli2	ENSMUSG00000021846	ENSMUST00000073150	1.10449	1.40258	1.40197	1.29502
Wipi1	ENSMUSG00000041895	ENSMUST00000103060	0.912955	1.60074	1.48483	1.29464
Gm14308	ENSMUSG00000078890	uc008ofz.1	1.0838	1.32349	1.51271	1.29462
Dgke	ENSMUSG00000000276	ENSMUST00000107894	1.00484	1.43535	1.50232	1.29402
Mdp1	ENSMUSG00000002329	uc007uab.1	1.04476	1.87395	1.10238	1.29232
mKIAA1019	ENSMUSG00000022961	ENSMUST00000167141	1.36931	1.37823	1.14094	1.2913
mKIAA0429	ENSMUSG00000022353	ENSMUST00000080371	1.36818	1.32601	1.1865	1.29118
Ranbp3	ENSMUSG00000002372	uc008dcu.1	1.38921	1.60212	0.966569	1.29092
Eif4b	ENSMUSG00000058655	uc007xuk.1	1.07413	1.23466	1.62149	1.29074
Yes1	ENSMUSG00000014932	uc008wzt.1	1.26709	1.24594	1.3613	1.29048
Chd4	ENSMUSG00000063870	uc009dtl.1	1.47012	1.31505	1.11119	1.29031
Suz12	ENSMUSG00000017548	ENSMUST00000017692	0.936352	1.52507	1.50408	1.29023
Nasp	ENSMUSG00000028693	ENSMUST00000154811	1.20801	1.15656	1.53699	1.29014
Fyttd1	ENSMUSG00000022800	ENSMUST00000149183	1.15592	1.44508	1.28533	1.29006
Atxn10	ENSMUSG00000016541	ENSMUST00000016685	0.95767	1.49667	1.49768	1.28999
Iws1	ENSMUSG00000024384	ENSMUST00000025243	1.01778	1.44546	1.45707	1.28938
Zfp81	ENSMUSG00000003929	ENSMUST00000054072	1.36611	1.04956	1.49406	1.2891
Rnmt	ENSMUSG00000009535	uc008fnj.1	0.955381	1.45075	1.54471	1.28886
Azin1	ENSMUSG00000037458	ENSMUST00000110328	1.4137	0.979954	1.54224	1.28797
Zfp445	ENSMUSG00000047036	uc009sfe.1	1.23786	1.43446	1.20138	1.2873
Ube2d3	ENSMUSG00000078578	uc008rlq.1	1.05491	1.63813	1.23412	1.28718
Eif4enif1	ENSMUSG00000020454	ENSMUST00000020734	1.1068	1.01252	1.90289	1.28715
Rad54l	ENSMUSG00000028702	uc008ugc.1	1.1485	1.59492	1.16393	1.28706
Mcf2l	ENSMUSG00000031442	ENSMUST00000064464	1.06288	1.81509	1.10489	1.28696
Lifr	ENSMUSG00000054263	ENSMUST00000171588	1.10345	1.31555	1.46761	1.28674
Snx13	ENSMUSG00000020590	uc007njg.1	1.62915	1.31384	0.994741	1.28649
Tsn	ENSMUSG00000026374	ENSMUST00000027623	1.26884	1.39589	1.19789	1.28497
Dhx9	ENSMUSG00000042699	ENSMUST00000042141	1.58894	1.1343	1.17668	1.28479
Pias2	ENSMUSG00000025423	uc008frb.1	1.08238	1.35915	1.44117	1.28466
Slc9a5	ENSMUSG00000014786	ENSMUST00000073149	1.05128	1.27253	1.5843	1.28452
Smek2	ENSMUSG00000020463	ENSMUST00000020755	1.24816	1.23667	1.37252	1.28434
Mlh1	ENSMUSG00000032498	ENSMUST00000123869	1.55161	1.10923	1.2309	1.28433
Ccdc77	ENSMUSG00000030177	ENSMUST00000032283	1.13491	1.47483	1.26512	1.28414
Mettl5	ENSMUSG00000051730	ENSMUST00000112258	1.07509	1.29007	1.52435	1.28345
Fastkd3	ENSMUSG00000021532	ENSMUST00000051784	1.35748	1.22942	1.2617	1.28173
Nit1	ENSMUSG00000013997	ENSMUST00000111289	1.20639	1.41218	1.23525	1.28148
Tardbp	ENSMUSG00000041459	ENSMUST00000055827	1.14238	1.21343	1.51653	1.28103
Dip2b	ENSMUSG00000023026	ENSMUST00000108971	1.61267	1.16672	1.11722	1.281
Nipbl	ENSMUSG00000022141	uc007veo.1	1.02546	1.47837	1.38517	1.28057
Sepsecs	ENSMUSG00000029173	ENSMUST00000031069	1.26063	1.04882	1.58807	1.28052
mKIAA1609	ENSMUSG00000034105	ENSMUST00000049156	0.937303	1.61565	1.38481	1.27999
4930453N24Rik	ENSMUSG00000059920	ENSMUST00000076991	1.18131	1.33765	1.32652	1.27979
Lig4	ENSMUSG00000049717	ENSMUST00000170033	1.72765	0.995669	1.21786	1.27955
Rbm33	ENSMUSG00000048271	ENSMUST00000090355	1.91256	1.11755	0.979983	1.27948
Use1	ENSMUSG00000002395	ENSMUST00000140236	1.02045	1.2779	1.60548	1.27928
Mbd4	ENSMUSG00000030322	ENSMUST00000122816	0.95152	1.41591	1.55353	1.27916
Morc3	ENSMUSG00000039456	ENSMUST00000044068	1.45565	1.10932	1.29453	1.27862
Pot1b	ENSMUSG00000024174	ENSMUST00000086876	1.40034	1.19915	1.2446	1.27854
Cpsf4	ENSMUSG00000029625	ENSMUST00000162244	1.17745	1.41657	1.25289	1.27849
Cdc14a	ENSMUSG00000033502	ENSMUST00000090464	1.0718	1.43788	1.35479	1.27812
Golga3	ENSMUSG00000029502	ENSMUST00000112512	1.10105	1.43944	1.31649	1.27783
Cul5	ENSMUSG00000032030	ENSMUST00000163470	1.08833	1.4622	1.30985	1.27741
Trpc2	ENSMUSG00000070425	ENSMUST00000153176	1.44265	1.20445	1.19956	1.27739
Tppp3	ENSMUSG00000014846	uc009ndc.1	1.41772	1.07988	1.3601	1.27696
Hsf1	ENSMUSG00000022556	ENSMUST00000072838	1.51728	1.14852	1.1949	1.27696
Zyg11a	ENSMUSG00000034645	ENSMUST00000106690	0.960229	1.82553	1.18759	1.27686
Eml5	ENSMUSG00000051166	ENSMUST00000029746	1.30374	1.18919	1.3423	1.27672
Strn3	ENSMUSG00000020954	ENSMUST00000013130	1.50709	1.21183	1.13922	1.27662
Dyrk1a	ENSMUSG00000022897	ENSMUST00000119878	1.69769	1.05889	1.15451	1.27556
Nr1d2	ENSMUSG00000021775	ENSMUST00000090543	1.16806	1.54543	1.14903	1.27531
Dnajb2	ENSMUSG00000026203	uc007bon.1	1.39637	1.49107	0.995119	1.27485
Ptdss2	ENSMUSG00000025495	uc009kjp.1	0.957854	1.54545	1.39944	1.27478
Slc23a2	ENSMUSG00000027340	ENSMUST00000028815	1.46717	1.19049	1.1854	1.27455
Setdb1	ENSMUSG00000015697	ENSMUST00000124638	1.15571	1.46045	1.22351	1.27345
Tssc1	ENSMUSG00000036613	ENSMUST00000035657	1.13888	1.35068	1.34205	1.27331
Mettl1	ENSMUSG00000006732	ENSMUST00000006915	1.50531	1.05305	1.30208	1.27322
mKIAA0092	ENSMUSG00000031922	ENSMUST00000124883	1.49914	1.06729	1.28833	1.27267
Zfp873	ENSMUSG00000061371	uc007gjj.1	1.67041	0.960835	1.2829	1.2722
Depdc5	ENSMUSG00000037426	ENSMUST00000119705	0.916453	1.66918	1.34391	1.27153
Rfwd3	ENSMUSG00000033596	uc009nmc.1	0.963654	1.17923	1.80753	1.27116
Pask	ENSMUSG00000026274	ENSMUST00000027493	1.27382	1.19789	1.34609	1.27116
Cdc73	ENSMUSG00000026361	ENSMUST00000018337	1.11242	1.33169	1.38606	1.27102
Dennd4c	ENSMUSG00000038024	ENSMUST00000082026	1.00685	1.53739	1.32605	1.27088
2810433K01Rik	ENSMUSG00000036223	uc008fpf.1	0.950982	1.5195	1.41797	1.27013
Calcoco2	ENSMUSG00000006056	ENSMUST00000068686	1.01363	1.67193	1.20871	1.27001
Gpn1	ENSMUSG00000064037	ENSMUST00000076949	1.29546	1.29933	1.21531	1.26943
Mdp1	ENSMUSG00000002329	ENSMUST00000002400	1.67807	0.949649	1.28226	1.26897
2610101N10Rik	ENSMUSG00000032407	ENSMUST00000078374	1.05392	1.39567	1.38917	1.26896
Ppap2a	ENSMUSG00000021759	uc007rwq.1	1.67006	1.20857	1.01102	1.2684
Polr2e	ENSMUSG00000004667	ENSMUST00000152843	1.59088	1.38134	0.928556	1.26838
Ppp1cc	ENSMUSG00000004455	ENSMUST00000128309	1.16778	1.28755	1.35537	1.26783
Ndufa11	ENSMUSG00000002379	uc008dda.1	1.04732	1.71057	1.1366	1.26748
Tigd2	ENSMUSG00000049232	ENSMUST00000062626	1.52921	1.32149	1.00712	1.26727
Snrnp48	ENSMUSG00000021431	uc007qdn.1	1.01373	1.19237	1.68226	1.2669
Tab3	ENSMUSG00000035476	ENSMUST00000048250	1.72795	1.00219	1.17383	1.26676
Taf10	ENSMUSG00000043866	ENSMUST00000141116	1.39518	1.4884	0.978192	1.26646
Cdan1	ENSMUSG00000027284	ENSMUST00000148285	1.36001	1.2107	1.23312	1.26627
Cdt1	ENSMUSG00000006585	uc009nte.1	1.32966	0.953129	1.59758	1.26508
Cyp51	ENSMUSG00000001467	ENSMUST00000001507	1.41036	1.2825	1.11818	1.26464
Ube3b	ENSMUSG00000029577	ENSMUST00000074002	1.37174	1.20822	1.21814	1.26388
Zfand5	ENSMUSG00000024750	ENSMUST00000149144	1.44254	1.18512	1.17971	1.26344
mKIAA1418	ENSMUSG00000005899	ENSMUST00000170401	1.21587	1.11901	1.48211	1.26338
Mastl	ENSMUSG00000026779	ENSMUST00000028119	1.2341	1.28696	1.26735	1.26261
Setx	ENSMUSG00000043535	uc008izn.1	1.05631	1.67662	1.13624	1.2625
Brsk1	ENSMUSG00000035390	ENSMUST00000120836	1.43712	1.09721	1.27564	1.26232
Rwdd4a	ENSMUSG00000031568	uc009lre.1	1.08133	1.33017	1.39821	1.26225
Tmpo	ENSMUSG00000019961	ENSMUST00000020123	1.33467	1.16482	1.29124	1.26148
Fam134c	ENSMUSG00000017802	ENSMUST00000017946	1.50642	1.23214	1.08082	1.26121
Mtdh	ENSMUSG00000022255	ENSMUST00000163697	1.15011	1.0719	1.62686	1.2611
Ctns	ENSMUSG00000005949	ENSMUST00000006103	1.00242	1.45825	1.37156	1.26095
Ampd2	ENSMUSG00000027889	ENSMUST00000102638	1.19623	1.543	1.08485	1.26042
Asxl2	ENSMUSG00000037486	uc007mwt.1	1.36356	1.26852	1.15617	1.25989
Atp7a	ENSMUSG00000033792	ENSMUST00000055941	1.68815	1.19924	0.987625	1.25981
Wdr82	ENSMUSG00000020257	ENSMUST00000172286	1.08259	1.59658	1.15442	1.25895
Ercc6	ENSMUSG00000054051	ENSMUST00000066807	1.42705	1.03494	1.35012	1.25866
Rps6ka5	ENSMUSG00000021180	ENSMUST00000110076	1.45246	1.04296	1.31532	1.25835
Exo1	ENSMUSG00000039748	ENSMUST00000039725	1.16558	1.56733	1.09057	1.2583
A730008H23Rik	ENSMUSG00000044783	uc007byn.1	1.16767	1.33632	1.27401	1.25739
Eif1a	ENSMUSG00000057561	ENSMUST00000168382	1.45607	1.27382	1.07157	1.2573
Idh1	ENSMUSG00000025950	ENSMUST00000169032	1.02945	1.27098	1.5179	1.25698
Rad51c	ENSMUSG00000007646	ENSMUST00000153073	1.24297	1.13815	1.40348	1.25687
Triml1	ENSMUSG00000031651	ENSMUST00000059692	1.11754	1.31559	1.35003	1.25673
2310035C23Rik	ENSMUSG00000026319	ENSMUST00000086721	1.68561	1.16218	1.013	1.25665
Gm14296	ENSMUSG00000074527	ENSMUST00000099007	1.36799	1.27177	1.13931	1.25616
0610009B22Rik	ENSMUSG00000007777	ENSMUST00000007921	0.993416	1.30006	1.53274	1.25561
Gtf2a1	ENSMUSG00000020962	ENSMUST00000021345	1.17521	1.34617	1.2506	1.25539
Slc10a7	ENSMUSG00000031684	ENSMUST00000034111	1.2049	1.25012	1.31294	1.25521
Tnk2	ENSMUSG00000022791	ENSMUST00000115125	1.43123	1.27432	1.08397	1.25507
Gdi1	ENSMUSG00000015291	ENSMUST00000149391	1.05879	1.34486	1.38744	1.25478
Uspl1	ENSMUSG00000041264	ENSMUST00000100410	1.06106	1.12748	1.64966	1.25434
Ccdc47	ENSMUSG00000078622	uc007lyi.1	1.18234	1.43586	1.16244	1.25432
BC032203	ENSMUSG00000036568	uc008cul.1	1.47011	1.23828	1.08333	1.25404
ORF19	ENSMUSG00000024101	ENSMUST00000072383	1.20604	1.43096	1.14207	1.2538
Gtf2h5	ENSMUSG00000034345	ENSMUST00000039487	1.10894	1.35621	1.30941	1.25344
Aim2	ENSMUSG00000037860	ENSMUST00000147604	1.15067	1.32039	1.29588	1.25335
Cdk11b	ENSMUSG00000029062	ENSMUST00000105598	0.949599	1.31532	1.57469	1.25292
Wwc2	ENSMUSG00000031563	ENSMUST00000057561	1.18757	1.2071	1.3715	1.25276
Morn4	ENSMUSG00000049670	ENSMUST00000051772	1.06426	1.42855	1.292	1.25238
AK019420	ENSMUSG00000024576	ENSMUST00000165123	1.07733	1.42033	1.28365	1.25236
Cnbp	ENSMUSG00000030057	uc009cud.1	1.09678	1.29641	1.3812	1.25229
Mtpap	ENSMUSG00000024234	uc008dyj.1	1.70193	1.01269	1.13925	1.25222
Kpna1	ENSMUSG00000022905	ENSMUST00000004054	1.23309	1.29581	1.22831	1.25203
Taf1d	ENSMUSG00000031939	ENSMUST00000164079	1.74118	0.9909	1.1365	1.25165
Nub1	ENSMUSG00000028954	uc008wsg.1	1.2252	1.19344	1.33882	1.25096
Tial1	ENSMUSG00000030846	ENSMUST00000123666	1.90673	0.932945	1.10016	1.25084
Zfp64	ENSMUSG00000027551	uc008obl.1	1.24387	1.5578	1.00953	1.25065
Wapal	ENSMUSG00000041408	ENSMUST00000048263	0.965947	1.47419	1.37363	1.25062
Ivns1abp	ENSMUSG00000023150	uc007cyp.1	1.4134	1.14575	1.20788	1.25062
Trim37	ENSMUSG00000018548	ENSMUST00000041282	1.01471	1.42737	1.35003	1.25047
EF437385	ENSMUSG00000049647	uc007hyr.1	0.96057	1.6261	1.25123	1.25027
Tab2	ENSMUSG00000015755	ENSMUST00000146444	1.37793	1.13535	1.248	1.24985
Smcr7l	ENSMUSG00000022412	ENSMUST00000023048	1.30825	1.17555	1.26927	1.24977
Atad1	ENSMUSG00000013662	ENSMUST00000070210	1.09307	1.35174	1.32073	1.24964
Etnk1	ENSMUSG00000030275	ENSMUST00000032413	0.970843	1.22376	1.64115	1.24929
Rybp	ENSMUSG00000072872	uc009dbw.1	1.27863	1.08657	1.4033	1.24926
Gorasp1	ENSMUSG00000032513	ENSMUST00000035099	1.24301	1.44469	1.08562	1.24923
Fbxo30	ENSMUSG00000047648	ENSMUST00000129456	1.19838	1.11597	1.45747	1.24915
Ppm1b	ENSMUSG00000061130	ENSMUST00000112304	1.14384	1.25616	1.34853	1.24669
Fxy	ENSMUSG00000035299	ENSMUST00000112107	1.19148	1.30685	1.24425	1.24663
Pigb	ENSMUSG00000079469	ENSMUST00000098566	1.54225	1.15836	1.08421	1.24654
Dnajc27	ENSMUSG00000020657	ENSMUST00000020986	1.44009	1.09553	1.22606	1.24597
Hipk2	ENSMUSG00000061436	uc009blb.1	1.25621	1.21504	1.26726	1.24597
Zbtb8os	ENSMUSG00000057572	ENSMUST00000141235	1.20929	1.31356	1.21757	1.24592
Ncapd3	ENSMUSG00000035024	uc009oqi.1	1.33892	1.41195	1.02293	1.24587
Nop58	ENSMUSG00000026020	uc007bdy.1	1.4062	1.27573	1.07661	1.24534
Mapk6	ENSMUSG00000042688	uc009qse.1	0.936892	1.47878	1.39351	1.24519
2510006D16Rik	ENSMUSG00000028797	ENSMUST00000151969	1.20012	1.14083	1.40971	1.24507
Chaf1a	ENSMUSG00000002835	uc008dar.1	1.38748	1.247	1.11504	1.24488
Ryr1	ENSMUSG00000030592	ENSMUST00000032813	1.2912	1.25872	1.18677	1.24479
sr528	ENSMUSG00000030967	ENSMUST00000106157	1.53222	1.0968	1.14634	1.24429
Lss	ENSMUSG00000033105	ENSMUST00000160671	1.01274	1.22044	1.55704	1.24386
Adprhl2	ENSMUSG00000042558	ENSMUST00000102617	1.31022	1.31533	1.11667	1.24385
Tmed8	ENSMUSG00000034111	ENSMUST00000037418	1.07903	1.40519	1.26875	1.2437
Cdca7	ENSMUSG00000055612	ENSMUST00000102691	1.13502	1.44952	1.16877	1.24352
Prim1	ENSMUSG00000025395	uc007hla.1	1.12116	1.10682	1.54871	1.24329
Snx19	ENSMUSG00000031993	ENSMUST00000034475	1.48463	1.1028	1.17358	1.2432
Fam48a	ENSMUSG00000027751	uc008pfm.1	1.02149	1.35503	1.38784	1.24311
Zfp809	ENSMUSG00000057982	uc009oof.1	1.2816	1.27579	1.17362	1.24266
Mterfd1	ENSMUSG00000021519	uc007qzy.1	1.32211	1.15833	1.25215	1.24237
Zkscan6	ENSMUSG00000018347	uc007jle.1	1.43326	1.40116	0.954629	1.24227
A530054K11Rik	ENSMUSG00000021510	ENSMUST00000012314	1.60242	1.06435	1.12221	1.24159
OTTMUSG00000016609	ENSMUSG00000078878	uc008ogs.1	1.17533	1.20778	1.34671	1.2411
Lrdd	ENSMUSG00000025507	ENSMUST00000026580	1.42799	1.20007	1.11534	1.24102
Vps13d	ENSMUSG00000020220	ENSMUST00000020441	0.973147	1.45883	1.34599	1.24091
Naa30	ENSMUSG00000036282	ENSMUST00000153488	1.31766	1.22343	1.18508	1.24082
Slc26a6	ENSMUSG00000023259	uc009rre.1	0.976302	1.44904	1.35035	1.2408
D16Ertd472e	ENSMUSG00000022864	uc007zsq.1	1.07166	1.20996	1.47311	1.24076
Cwc25	ENSMUSG00000018541	ENSMUST00000018685	1.52051	1.20016	1.04643	1.24064
Mre11a	ENSMUSG00000031928	ENSMUST00000115632	1.17237	1.2824	1.26922	1.24034
Tmem138	ENSMUSG00000024666	ENSMUST00000025568	1.21555	1.39668	1.12386	1.2403
Tjp2	ENSMUSG00000024812	ENSMUST00000099558	1.15919	1.26378	1.30235	1.24028
Ivns1abp	ENSMUSG00000023150	ENSMUST00000111887	1.09835	1.19715	1.44965	1.2399
Tmco4	ENSMUSG00000041143	ENSMUST00000043042	1.48071	1.24141	1.0367	1.23978
Dhx32	ENSMUSG00000030986	uc009kdj.1	1.18712	1.3303	1.20627	1.23964
Zfp36l1	ENSMUSG00000021127	ENSMUST00000021552	1.47464	1.3804	0.935824	1.23964
Vps13a	ENSMUSG00000046230	uc008gwv.1	1.07836	1.24856	1.41423	1.23946
Ubc	ENSMUSG00000008348	uc008zrk.1	1.59138	1.29898	0.920637	1.23924
Gpcpd1	ENSMUSG00000027346	ENSMUST00000060955	1.44908	1.2643	1.03856	1.23915
Gsg2	ENSMUSG00000050107	ENSMUST00000052140	1.50536	1.14838	1.10041	1.23906
Bat1a	ENSMUSG00000019432	uc008cgz.1	1.58973	1.18589	1.0087	1.23892
Trim23	ENSMUSG00000021712	ENSMUST00000022225	1.23598	1.30996	1.17384	1.23868
Parp16	ENSMUSG00000032392	ENSMUST00000069000	1.64278	1.19241	0.969592	1.23841
mKIAA4196	ENSMUSG00000063108	ENSMUST00000159569	1.23248	1.15369	1.33552	1.23834
1110004F10Rik	ENSMUSG00000030663	ENSMUST00000106608	1.05705	1.36758	1.31338	1.23826
Cdkn2aipnl	ENSMUSG00000020392	ENSMUST00000102763	1.12427	1.30033	1.29604	1.23741
Iqcb1	ENSMUSG00000022837	ENSMUST00000023535	1.18818	1.33537	1.19329	1.23711
Cntrob	ENSMUSG00000032782	ENSMUST00000092973	1.09417	1.38437	1.24971	1.23704
Slc7a7	ENSMUSG00000000958	uc007tvw.1	1.38362	1.29178	1.05897	1.23698
Smcr8	ENSMUSG00000049323	ENSMUST00000056907	1.6151	1.24634	0.938987	1.23642
Mcm10	ENSMUSG00000026669	ENSMUST00000102985	1.20326	1.29453	1.21251	1.2361
Mphosph6	ENSMUSG00000031843	ENSMUST00000034303	1.13823	1.07903	1.53771	1.23608
Tymp	ENSMUSG00000022615	uc007xgl.1	1.58872	1.16651	1.01806	1.23567
Rbm7	ENSMUSG00000042396	uc009pif.1	1.51744	1.14229	1.08832	1.23561
Fbxl5	ENSMUSG00000039753	ENSMUST00000124421	0.934546	1.48802	1.356	1.23545
Araf	ENSMUSG00000001127	ENSMUST00000122312	1.18682	1.40637	1.12906	1.23519
Zfp820	ENSMUSG00000069743	ENSMUST00000084141	1.18303	1.51047	1.05327	1.23466
Sall1	ENSMUSG00000031665	ENSMUST00000034090	1.43133	0.998445	1.31654	1.23452
Basp1	ENSMUSG00000045763	ENSMUST00000058845	0.925609	1.20897	1.68079	1.23439
Tbccd1	ENSMUSG00000004462	uc007ysk.1	0.936393	1.4959	1.34226	1.23424
Vmn2r-ps14	ENSMUSG00000052912	uc008vrx.1	1.14323	1.26739	1.29692	1.23401
Tmem48	ENSMUSG00000028614	ENSMUST00000139560	1.13492	1.17932	1.40378	1.23395
Zfp292	ENSMUSG00000039967	ENSMUST00000047950	1.4425	1.15211	1.12998	1.23375
Trim13	ENSMUSG00000035235	uc007ufy.1	1.42056	0.973055	1.35731	1.23336
Srp54c	ENSMUSG00000073079	uc007nol.1	0.950284	1.51892	1.29968	1.23332
Herpud2	ENSMUSG00000008429	uc009opj.1	1.59041	1.26896	0.929355	1.23324
Dcaf4	ENSMUSG00000021222	uc007odf.1	1.17213	1.20675	1.32418	1.23267
100043387	ENSMUSG00000078885	uc008ogk.1	1.12132	1.22309	1.36554	1.23262
Mgea5	ENSMUSG00000025220	uc008hro.1	1.36097	1.22102	1.12697	1.23262
Nfu1	ENSMUSG00000029993	ENSMUST00000120240	1.26143	1.58961	0.933944	1.23261
Cdc26	ENSMUSG00000066149	ENSMUST00000134727	0.960122	1.29093	1.50774	1.23174
Tmx3	ENSMUSG00000024614	uc008fvu.1	0.91643	1.14217	1.78449	1.23154
Rnf121	ENSMUSG00000070426	ENSMUST00000096639	1.37739	1.16307	1.16543	1.23136
Rprd1b	ENSMUSG00000027651	ENSMUST00000103123	1.09544	1.37049	1.24219	1.23088
Stam2	ENSMUSG00000055371	ENSMUST00000150582	1.03873	1.47372	1.21816	1.23086
Rbmxrt	ENSMUSG00000037070	uc009mia.1	1.3551	1.11808	1.23005	1.23061
Itfg1	ENSMUSG00000031703	ENSMUST00000034140	1.4676	1.33162	0.95257	1.23016
Usp37	ENSMUSG00000033364	ENSMUST00000044260	1.2337	1.22335	1.23284	1.22996
mKIAA0444	ENSMUSG00000005045	ENSMUST00000005175	1.40037	1.25134	1.06131	1.22976
Usp53	ENSMUSG00000039701	ENSMUST00000090379	1.51225	1.10543	1.11052	1.22902
Srsf10	ENSMUSG00000028676	uc008vhb.1	1.43673	1.12631	1.14695	1.22893
Cdc37l1	ENSMUSG00000024780	ENSMUST00000050148	1.12812	1.26338	1.30181	1.22879
A730069N07Rik	ENSMUSG00000031523	ENSMUST00000033923	1.45156	1.11052	1.14974	1.22834
Socs4	ENSMUSG00000048379	ENSMUST00000065562	1.53892	0.971859	1.23873	1.22819
Terf2ip	ENSMUSG00000033430	ENSMUST00000052138	1.21746	1.14115	1.33261	1.22791
Thoc4	ENSMUSG00000025134	ENSMUST00000026125	1.02072	1.14532	1.58177	1.22742
2012-09-01	ENSMUSG00000000486	uc009juq.1	0.927181	1.31859	1.51057	1.22689
Phf20l1	ENSMUSG00000072501	uc007wan.1	1.4076	1.23411	1.06306	1.22686
Synrg	ENSMUSG00000034940	ENSMUST00000092834	1.11595	1.48642	1.11316	1.22682
Trim33	ENSMUSG00000033014	ENSMUST00000029444	1.34911	1.12674	1.21377	1.2265
mAWMS1	ENSMUSG00000029817	ENSMUST00000031841	1.35782	1.07025	1.26902	1.2263
Hmgb2	ENSMUSG00000054717	ENSMUST00000067925	1.14606	1.06647	1.50696	1.2258
Wnk1	ENSMUSG00000045962	ENSMUST00000088644	1.247	1.40007	1.05415	1.22548
Rpsa	ENSMUSG00000032518	uc009scf.1	1.61117	1.03077	1.10561	1.22453
Dmxl1	ENSMUSG00000037416	uc008ewo.1	1.3773	1.14708	1.16187	1.22441
Magi1	ENSMUSG00000045095	ENSMUST00000093769	1.34798	1.33521	1.01762	1.22351
Ppp2r2a	ENSMUSG00000022052	uc007uku.1	1.13383	1.07979	1.49574	1.22344
Lnp	ENSMUSG00000009207	ENSMUST00000134641	1.56436	0.983086	1.19061	1.22339
Traip	ENSMUSG00000032586	ENSMUST00000049348	1.31776	1.30878	1.0616	1.22336
Gdi1	ENSMUSG00000015291	ENSMUST00000146013	1.29736	1.21096	1.16461	1.22309
1810055G02Rik	ENSMUSG00000035372	uc008fwu.1	0.92608	1.24548	1.58563	1.22292
Ndor1	ENSMUSG00000006471	uc008iqw.1	1.40846	1.31211	0.989524	1.22287
Dnajc5	ENSMUSG00000000826	ENSMUST00000072334	1.40245	1.39384	0.935292	1.22278
Hnrnpul1	ENSMUSG00000040725	uc009ftv.1	1.138	1.28722	1.24757	1.22261
Phip	ENSMUSG00000032253	ENSMUST00000167283	1.2396	1.26753	1.16303	1.22258
Parvb	ENSMUSG00000022438	ENSMUST00000023072	0.989018	1.17752	1.56893	1.22253
Tsr2	ENSMUSG00000025264	ENSMUST00000026295	1.12764	1.41584	1.14385	1.22232
H2-M5	ENSMUSG00000024459	ENSMUST00000113667	1.02423	1.60207	1.11265	1.22221
Pxn	ENSMUSG00000029528	ENSMUST00000112060	1.11447	1.19034	1.37622	1.2222
Fam120b	ENSMUSG00000014763	uc008aok.1	1.51119	1.31897	0.914128	1.22139
Ssr2	ENSMUSG00000041355	uc008pvs.1	0.998313	1.38504	1.31646	1.22099
Tcp1	ENSMUSG00000068039	uc008alk.1	1.08146	1.31418	1.28	1.22075
Sf1	ENSMUSG00000024949	ENSMUST00000146298	1.01641	1.35511	1.32	1.2205
Foxo1	ENSMUSG00000044167	ENSMUST00000053764	1.16895	1.04853	1.48262	1.22031
Slc38a6	ENSMUSG00000044712	ENSMUST00000140523	1.40207	1.22779	1.05533	1.22019
6720463M24Rik	ENSMUSG00000022070	ENSMUST00000022656	1.09079	1.2126	1.37258	1.21992
Atad2	ENSMUSG00000022360	ENSMUST00000038194	1.34811	1.14681	1.17414	1.21987
Rnf138	ENSMUSG00000024317	ENSMUST00000052396	0.975734	1.31967	1.40935	1.21975
Aen	ENSMUSG00000030609	ENSMUST00000123824	1.20444	1.43497	1.04989	1.21971
Dse	ENSMUSG00000039497	uc007eus.1	1.10886	1.31424	1.24402	1.21935
Ippk	ENSMUSG00000021385	ENSMUST00000021817	1.32231	1.13477	1.20725	1.21903
Elac1	ENSMUSG00000036941	ENSMUST00000041138	1.30254	1.1981	1.16051	1.21893
Ubqln1	ENSMUSG00000005312	uc007qtm.1	1.39285	1.0567	1.22976	1.21868
Tada2a	ENSMUSG00000018651	ENSMUST00000018795	1.1913	0.997976	1.52152	1.21845
Pdss2	ENSMUSG00000038240	ENSMUST00000095725	1.09778	1.22423	1.34551	1.2183
Mrps24	ENSMUSG00000020477	ENSMUST00000132874	1.0454	1.432	1.20691	1.21796
Chn1	ENSMUSG00000056486	ENSMUST00000139252	1.10862	1.3551	1.20197	1.21773
Ei24	ENSMUSG00000062762	uc009oub.1	1.0469	1.25279	1.37567	1.2174
Zfp958	ENSMUSG00000058748	uc009ktz.1	1.23792	1.11899	1.30233	1.21734
Rps9	ENSMUSG00000006333	ENSMUST00000006496	1.07466	1.10455	1.51937	1.21723
2810403A07Rik	ENSMUSG00000028060	uc008pwf.1	1.37811	1.18595	1.10336	1.21718
Rbm12	ENSMUSG00000089824	ENSMUST00000109604	1.34049	0.976465	1.37733	1.21708
Tmx3	ENSMUSG00000024614	ENSMUST00000025515	1.17331	1.41192	1.08615	1.21629
Trpc2	ENSMUSG00000070425	uc009iqj.1	1.34094	1.23628	1.08481	1.21608
Slc25a36	ENSMUSG00000032449	ENSMUST00000085206	1.2372	1.20864	1.20058	1.21537
Rad9	ENSMUSG00000024824	ENSMUST00000025740	1.43586	1.09074	1.14607	1.21529
n/a	2610044O15Rik	uc008dwt.1	1.29235	0.984192	1.40965	1.21485
Eprs	ENSMUSG00000026615	uc007dzf.1	1.11412	1.41091	1.14047	1.2148
Pycr2	ENSMUSG00000026520	uc007dwv.1	1.01635	1.3336	1.32226	1.21468
scmh1	ENSMUSG00000000085	ENSMUST00000000087	1.03517	1.13061	1.52944	1.21419
Chmp1a	ENSMUSG00000000743	ENSMUST00000000759	0.987131	1.35414	1.33908	1.21418
Rev1	ENSMUSG00000026082	uc007asr.1	1.29569	1.01171	1.36512	1.21407
Gstcd	ENSMUSG00000028018	ENSMUST00000029651	1.08941	1.20444	1.36379	1.21407
Osbpl1a	ENSMUSG00000044252	ENSMUST00000074352	1.07189	1.21924	1.36919	1.21404
Sec62	ENSMUSG00000027706	ENSMUST00000029256	1.43906	1.2081	1.02865	1.21381
Ash2l	ENSMUSG00000031575	uc009lhd.1	0.959773	1.38208	1.34732	1.21355
Prkx	ENSMUSG00000035725	ENSMUST00000036333	1.24323	1.22996	1.16856	1.21348
Cul4a	ENSMUSG00000031446	ENSMUST00000016680	1.09311	1.3941	1.17167	1.21317
Golga2	ENSMUSG00000002546	ENSMUST00000113377	1.32574	1.02959	1.30781	1.21308
Eif4g1	ENSMUSG00000045983	ENSMUST00000115461	1.23522	1.37204	1.05321	1.21304
Slc25a19	ENSMUSG00000020744	ENSMUST00000021089	1.10162	1.38533	1.16947	1.213
Ddx3x	ENSMUSG00000000787	ENSMUST00000000804	1.18952	1.36398	1.09989	1.21295
Gm14403	ENSMUSG00000067480	uc008ohb.1	1.43089	1.36761	0.91191	1.21294
8430406I07Rik	ENSMUSG00000027424	ENSMUST00000028910	1.44639	1.18641	1.03984	1.21291
Chic1	ENSMUSG00000031327	ENSMUST00000116547	1.40198	1.04732	1.21391	1.21246
Sipa1l2	ENSMUSG00000001995	uc009nyf.1	1.04657	1.24386	1.36894	1.21239
Dhx16	ENSMUSG00000024422	uc008ciw.1	1.45379	1.01538	1.20439	1.21143
Naa15	ENSMUSG00000063273	ENSMUST00000029303	1.21677	1.14975	1.26895	1.21083
Zfp280d	ENSMUSG00000038535	uc009qpq.1	1.25683	1.15556	1.22221	1.2108
B4galt6	ENSMUSG00000056124	ENSMUST00000070080	0.940558	1.39513	1.35158	1.21045
Gm14124	ENSMUSG00000079008	ENSMUST00000109922	1.39844	1.10786	1.14403	1.21019
Tsc22d1	ENSMUSG00000022010	ENSMUST00000022587	1.40245	1.256	1.00563	1.20996
2700089E24Rik	ENSMUSG00000072704	ENSMUST00000100864	1.2829	1.20947	1.14072	1.20964
1110034A24Rik	ENSMUSG00000020973	ENSMUST00000021356	1.24425	1.15566	1.22974	1.20925
Ewsr1	ENSMUSG00000009079	uc007hvz.1	1.09295	1.26971	1.27347	1.20901
AK053772	ENSMUSG00000033713	ENSMUST00000046859	0.921589	1.1402	1.68174	1.209
Serinc3	ENSMUSG00000017707	ENSMUST00000017851	0.942837	1.54647	1.21126	1.20876
Taok3	ENSMUSG00000061288	uc008zfk.1	1.17765	1.45907	1.02775	1.20873
Smyd2	ENSMUSG00000026603	ENSMUST00000130804	1.26667	1.13451	1.22717	1.20816
Hspb11	ENSMUSG00000063172	ENSMUST00000106749	1.01795	1.36548	1.26767	1.20783
2310057M21Rik	ENSMUSG00000040177	ENSMUST00000059438	1.48682	1.01647	1.16546	1.20768
Atg5	ENSMUSG00000038160	ENSMUST00000039286	1.02803	1.37264	1.24643	1.2071
Ecd	ENSMUSG00000021810	ENSMUST00000022344	1.41218	1.10176	1.12978	1.20686
Zmym4	ENSMUSG00000042446	uc008uty.1	1.4814	1.12784	1.0515	1.20663
Vps33a	ENSMUSG00000029434	ENSMUST00000031388	0.976003	1.29038	1.39452	1.20651
Fancm	ENSMUSG00000055884	ENSMUST00000058889	1.33781	1.26125	1.04053	1.20638
Plekhm3	ENSMUSG00000051344	ENSMUST00000097713	1.29131	1.26158	1.07496	1.20535
C330019L16Rik	ENSMUSG00000074158	uc009gmc.1	1.03905	1.2169	1.38351	1.20492
Amd2	ENSMUSG00000075232	uc007ews.1	1.19929	1.1461	1.27213	1.20474
Gm14420	ENSMUSG00000078866	uc008oha.1	1.42522	1.10725	1.10756	1.20457
Zbtb11	ENSMUSG00000022601	ENSMUST00000050248	1.40643	1.08259	1.14532	1.20366
Tex261	ENSMUSG00000014748	ENSMUST00000014892	0.953873	1.43015	1.2783	1.20365
Trip12	ENSMUSG00000026219	ENSMUST00000027421	1.13754	1.28723	1.1904	1.20348
Setd5	ENSMUSG00000034269	ENSMUST00000142215	1.58024	0.930756	1.18504	1.20346
Nup155	ENSMUSG00000022142	uc007vej.1	1.30172	1.11562	1.19958	1.20325
AK204443	ENSMUSG00000027465	ENSMUST00000028963	0.965574	1.16079	1.55333	1.20301
Smndc1	ENSMUSG00000025024	ENSMUST00000025997	1.53629	1.02951	1.10039	1.20286
Gm8909	ENSMUSG00000073402	ENSMUST00000040467	1.52015	1.17815	0.971481	1.20275
Clpx	ENSMUSG00000015357	uc009qdb.1	1.04899	1.2963	1.27921	1.20265
Zwilch	ENSMUSG00000032400	ENSMUST00000138075	1.05928	1.37453	1.19468	1.20265
Ascc3	ENSMUSG00000038774	ENSMUST00000035606	1.36223	0.973056	1.31069	1.20216
n/a	ENSMUSG00000063953	ENSMUST00000080898	1.22847	1.10669	1.27769	1.2021
D330012F22Rik	ENSMUSG00000050973	ENSMUST00000163253	1.15951	1.16839	1.28134	1.20183
Thrap3	ENSMUSG00000043962	ENSMUST00000151728	0.956024	1.30464	1.39074	1.20153
Nup155	ENSMUSG00000022142	ENSMUST00000022742	1.02271	1.16569	1.45216	1.20074
4930503L19Rik	ENSMUSG00000044906	ENSMUST00000067556	1.32981	1.10921	1.17285	1.20046
Mtbp	ENSMUSG00000022369	ENSMUST00000022998	1.26486	1.10939	1.23259	1.20037
Impact	ENSMUSG00000024423	ENSMUST00000025290	0.972831	1.56865	1.13307	1.20026
Mak16	ENSMUSG00000031578	ENSMUST00000033983	1.28558	1.0447	1.28698	1.20011
Mbd4	ENSMUSG00000030322	ENSMUST00000032469	1.12832	1.18707	1.28951	1.19981
Mtr	ENSMUSG00000021311	ENSMUST00000099856	1.02593	1.33272	1.2631	1.19977
Slc29a3	ENSMUSG00000020100	ENSMUST00000117513	0.966399	1.37491	1.29951	1.19969
Ccar1	ENSMUSG00000020074	ENSMUST00000020268	1.2834	1.18499	1.13523	1.19965
Ilf2	ENSMUSG00000001016	uc008qci.1	0.927759	1.21363	1.53284	1.19952
Nars	ENSMUSG00000024587	uc008fel.1	1.21775	1.40875	1.00398	1.19869
Slc10a7	ENSMUSG00000031684	uc009mic.1	1.56787	1.11639	0.98399	1.19868
Sf1	ENSMUSG00000024949	ENSMUST00000131252	1.05416	1.26144	1.2952	1.19868
Gfm1	ENSMUSG00000027774	ENSMUST00000077271	1.10722	1.24388	1.25014	1.19855
Wdr89	ENSMUSG00000045690	uc007nxj.1	1.08749	1.20038	1.31869	1.19847
Naa25	ENSMUSG00000042719	ENSMUST00000042163	1.36384	1.07457	1.17443	1.19842
Sh2b3	ENSMUSG00000042594	ENSMUST00000136960	1.15296	1.33555	1.11724	1.19823
Nphs1	ENSMUSG00000006649	ENSMUST00000006825	1.17168	1.04611	1.40313	1.1981
Ints7	ENSMUSG00000037461	uc007eco.1	1.28947	1.06531	1.2511	1.19782
Dctn2	ENSMUSG00000025410	uc007hiu.1	1.48549	1.23944	0.933406	1.19781
Rbbp5	ENSMUSG00000026439	uc007coy.1	1.567	1.12109	0.977137	1.19735
Rttn	ENSMUSG00000023066	uc008fvj.1	1.33719	1.07178	1.19759	1.1973
mAWMS1	ENSMUSG00000029817	ENSMUST00000101417	1.01937	1.20061	1.40155	1.19705
Pdcd2	ENSMUSG00000014771	ENSMUST00000054450	1.11597	1.29726	1.18407	1.1968
Lig4	ENSMUSG00000049717	ENSMUST00000095476	1.16152	1.0559	1.3908	1.19482
Prmt10	ENSMUSG00000037134	ENSMUST00000056237	1.34992	0.960677	1.31512	1.19477
Plekha3	ENSMUSG00000002733	ENSMUST00000111920	1.0758	1.26888	1.24845	1.19447
Smg7	ENSMUSG00000042772	ENSMUST00000073441	1.22466	1.3729	1.01254	1.19405
Trmt61a	ENSMUSG00000060950	ENSMUST00000084947	1.37277	1.26004	0.983843	1.1939
Gprasp2	ENSMUSG00000072966	ENSMUST00000113136	1.06259	1.12886	1.4143	1.19266
n/a	BC064714	uc007qxe.1	1.41031	0.91838	1.30968	1.19262
Elof1	ENSMUSG00000013822	uc009onx.1	1.47844	1.16597	0.983802	1.19252
Rpf1	ENSMUSG00000028187	ENSMUST00000029838	1.20972	1.1536	1.21429	1.19222
Nup160	ENSMUSG00000051329	ENSMUST00000057481	1.29002	1.06458	1.23388	1.1922
Gmps	ENSMUSG00000027823	ENSMUST00000029405	0.960799	1.42731	1.23526	1.19207
Setdb2	ENSMUSG00000071350	ENSMUST00000161459	1.37096	1.23061	1.00384	1.19198
Cdc25c	ENSMUSG00000044201	ENSMUST00000060710	1.16703	1.30018	1.11527	1.19167
Nol9	ENSMUSG00000028948	ENSMUST00000084116	1.20564	1.18897	1.1798	1.19142
Zfp667	ENSMUSG00000054893	ENSMUST00000108562	1.12633	1.14221	1.31421	1.19132
Myb	ENSMUSG00000019982	ENSMUST00000020156	1.21361	1.13984	1.22199	1.19123
AA987161	ENSMUSG00000058093	ENSMUST00000012873	1.31131	1.04766	1.23003	1.1911
Dlg4	ENSMUSG00000020886	ENSMUST00000018700	1.20989	1.18961	1.17185	1.19035
Mrpl28	ENSMUSG00000024181	ENSMUST00000025014	1.14163	1.31248	1.12438	1.1899
Smarcad1	ENSMUSG00000029920	ENSMUST00000031984	1.32001	1.09337	1.16718	1.18986
Mrpl40	ENSMUSG00000022706	ENSMUST00000119273	0.976903	1.36895	1.259	1.18966
Supt6h	ENSMUSG00000002052	ENSMUST00000002121	1.29619	1.15152	1.12749	1.18946
Atg2b	ENSMUSG00000041341	ENSMUST00000041055	1.21547	1.17261	1.18001	1.18922
Mrps33	ENSMUSG00000029918	ENSMUST00000139992	0.941917	1.35071	1.32115	1.18898
Capn10	ENSMUSG00000026270	uc007cby.1	1.04038	1.2295	1.31377	1.18891
Uba2	ENSMUSG00000052997	ENSMUST00000102746	1.04096	1.27403	1.26634	1.18865
Rps12	ENSMUSG00000061983	uc007epw.1	1.11821	1.22999	1.22037	1.18843
Tax1bp1	ENSMUSG00000004535	ENSMUST00000080723	0.97682	1.22612	1.40099	1.18831
Cir1	ENSMUSG00000041777	ENSMUST00000058615	1.19041	1.32451	1.06127	1.18721
Rps19bp1	ENSMUSG00000051518	ENSMUST00000052499	1.19078	1.22672	1.14549	1.1872
Picalm	ENSMUSG00000039361	ENSMUST00000107224	1.29821	1.04244	1.23253	1.18595
Jbp1	ENSMUSG00000023110	ENSMUST00000023873	1.09242	1.1099	1.37562	1.18592
Vps13d	ENSMUSG00000020220	uc008vrq.1	1.38213	1.02689	1.17496	1.18586
Gm7325	ENSMUSG00000079471	uc008crg.1	1.02052	1.23596	1.32162	1.1857
Trip13	ENSMUSG00000021569	ENSMUST00000022053	1.11558	1.24033	1.20443	1.1856
Wdr5	ENSMUSG00000026917	ENSMUST00000113952	0.983707	1.29192	1.30861	1.18478
ACRP	ENSMUSG00000038816	ENSMUST00000045142	0.955842	1.49751	1.16158	1.18468
Ppil5	ENSMUSG00000034883	ENSMUST00000110621	1.35764	1.01321	1.2081	1.18448
Depdc5	ENSMUSG00000037426	ENSMUST00000120902	1.23986	1.09444	1.22444	1.1844
Fam118b	ENSMUSG00000050471	ENSMUST00000059057	0.909763	1.49073	1.22382	1.18399
Mdk	ENSMUSG00000027239	uc008kww.1	1.26447	1.29727	1.01163	1.18391
Als2	ENSMUSG00000026024	ENSMUST00000027178	0.975305	1.29924	1.30718	1.18319
Txnl4a	ENSMUSG00000057130	uc008fso.1	0.926843	1.22939	1.45256	1.18289
Kirrel2	ENSMUSG00000036915	ENSMUST00000045817	0.924508	1.13839	1.57087	1.18245
Nodal	ENSMUSG00000037171	ENSMUST00000049339	1.33379	0.919886	1.34571	1.18193
Usp19	ENSMUSG00000006676	uc009rpt.1	1.39675	1.23075	0.960267	1.18184
Hells	ENSMUSG00000025001	ENSMUST00000025965	1.15243	1.17836	1.21527	1.18174
1110021L09Rik	ENSMUSG00000037455	ENSMUST00000119597	1.1473	1.18445	1.21402	1.18161
Eif2c1	ENSMUSG00000041530	ENSMUST00000097888	1.11851	1.26568	1.16487	1.18145
Zfp764	ENSMUSG00000045757	ENSMUST00000059199	1.3935	1.10236	1.07292	1.18123
5830418K08Rik	ENSMUSG00000046111	ENSMUST00000161132	1.2019	1.12097	1.22232	1.1809
Eif2ak2	ENSMUSG00000024079	ENSMUST00000024884	1.32712	1.31681	0.936776	1.17857
Hs1bp3	ENSMUSG00000020605	ENSMUST00000020927	0.973235	1.41687	1.18634	1.17829
Usp49	ENSMUSG00000090115	ENSMUST00000024779	0.920254	1.37312	1.29419	1.17816
Pusl1	ENSMUSG00000051557	ENSMUST00000097737	1.26728	1.31473	0.981445	1.17813
AK153988	ENSMUSG00000004071	ENSMUST00000117713	0.961894	1.3386	1.2695	1.17798
Yeats2	ENSMUSG00000041215	ENSMUST00000115560	1.30022	1.0057	1.24961	1.17784
Cdc42	ENSMUSG00000006699	uc008viz.1	1.0335	1.25684	1.25712	1.17758
Phc3	ENSMUSG00000037652	ENSMUST00000168645	1.35245	1.16479	1.03649	1.17754
Kifc5b	ENSMUSG00000024301	ENSMUST00000078961	1.21371	1.13258	1.1877	1.17751
Fam48a	ENSMUSG00000027751	uc008pfk.1	1.11097	1.14658	1.27994	1.17697
Sult4a1	ENSMUSG00000018865	uc007xbt.1	0.964803	1.19133	1.41779	1.17678
Dcaf7	ENSMUSG00000049354	ENSMUST00000058438	1.10858	1.20898	1.2156	1.17668
Atxn3	ENSMUSG00000021189	ENSMUST00000021606	1.05175	1.22254	1.26701	1.17666
Luc7l2	ENSMUSG00000029823	ENSMUST00000101519	1.11173	1.35994	1.07716	1.17652
Optn	ENSMUSG00000026672	ENSMUST00000114996	1.16887	1.18633	1.17379	1.17631
Psmd11	ENSMUSG00000017428	uc007kme.1	1.00063	1.38678	1.17291	1.17629
C330007P06Rik	ENSMUSG00000006423	ENSMUST00000115248	1.13043	1.22593	1.17412	1.17618
Tmem167	ENSMUSG00000012422	ENSMUST00000161568	1.25287	1.1704	1.10949	1.17612
Kdsr	ENSMUSG00000009905	ENSMUST00000010049	1.06393	1.33453	1.14573	1.17609
Rqcd1	ENSMUSG00000026174	ENSMUST00000087215	1.41682	0.942789	1.21772	1.17605
Cspp1	ENSMUSG00000056763	ENSMUST00000071087	1.36259	1.1501	1.03766	1.17594
Slc30a7	ENSMUSG00000054414	ENSMUST00000067485	1.06313	1.22759	1.24425	1.17539
Ip6k2	ENSMUSG00000032599	uc009rqu.1	1.05833	1.13233	1.35287	1.17476
Cops8	ENSMUSG00000034432	ENSMUST00000036153	1.19123	1.19526	1.13581	1.17378
Map3k2	ENSMUSG00000024383	ENSMUST00000096575	0.964046	1.36284	1.23052	1.17366
Haus6	ENSMUSG00000038047	ENSMUST00000070607	1.1483	1.18184	1.19105	1.17359
2310003F16Rik	ENSMUSG00000027245	ENSMUST00000125849	1.16514	1.29297	1.07192	1.17321
Mef2a	ENSMUSG00000030557	ENSMUST00000156690	1.13526	1.28512	1.10682	1.1732
Polr3h	ENSMUSG00000022476	ENSMUST00000023113	1.09274	1.25777	1.17373	1.17281
Mpp5	ENSMUSG00000021112	ENSMUST00000082024	1.34183	1.05345	1.14049	1.17256
BC016423	ENSMUSG00000033799	uc007piw.1	1.01964	1.28642	1.22819	1.17228
Dzip3	ENSMUSG00000064061	ENSMUST00000121869	1.30963	1.14429	1.07364	1.17178
Cnot1	ENSMUSG00000036550	uc009myy.1	1.01388	1.16505	1.36178	1.17169
Pls1	ENSMUSG00000049493	ENSMUST00000093800	1.01505	1.18408	1.33788	1.17156
Smg7	ENSMUSG00000042772	ENSMUST00000111836	1.23785	1.36043	0.953918	1.17116
Uhrf1bp1l	ENSMUSG00000019951	ENSMUST00000020112	0.997029	1.40844	1.14336	1.17096
AK037193	ENSMUSG00000056211	ENSMUST00000170793	1.13061	0.96286	1.47478	1.17094
Zbtb7a	ENSMUSG00000035011	ENSMUST00000048128	1.06879	1.28219	1.16972	1.17033
Nme6	ENSMUSG00000032478	ENSMUST00000122343	1.23552	1.21832	1.06439	1.17014
1810029B16Rik	ENSMUSG00000025591	ENSMUST00000026681	1.08896	1.2012	1.2242	1.16993
Vps16	ENSMUSG00000027411	uc008mjb.1	1.25106	1.04554	1.22213	1.16926
Gtf3c2	ENSMUSG00000029144	ENSMUST00000151370	0.941489	1.2454	1.36234	1.16897
Sf3b3	ENSMUSG00000033732	ENSMUST00000042012	1.30146	0.959776	1.27852	1.16888
Bud31	ENSMUSG00000038722	ENSMUST00000162594	1.14354	1.18226	1.1805	1.16863
ELF2	ENSMUSG00000037174	ENSMUST00000168133	1.44411	0.984547	1.12154	1.16829
Myo7a	ENSMUSG00000030761	uc009ijy.1	1.02955	1.22945	1.25976	1.16829
Tlcd1	ENSMUSG00000019437	ENSMUST00000127587	1.16884	1.40764	0.969149	1.16828
Kntc1	ENSMUSG00000029414	ENSMUST00000031366	1.22409	1.17266	1.11026	1.16808
Gnl3	ENSMUSG00000042354	ENSMUST00000037739	1.11657	1.31052	1.08816	1.16772
Gtf3c2	ENSMUSG00000029144	uc008wxf.1	0.961116	1.16484	1.42194	1.16764
Rabgap1	ENSMUSG00000035437	ENSMUST00000112920	1.27106	1.12789	1.10934	1.16725
Ndel1	ENSMUSG00000018736	uc007jod.1	1.28242	1.30635	0.949121	1.16718
Pex1	ENSMUSG00000005907	ENSMUST00000121291	1.15009	1.1361	1.21625	1.16697
Cnot6	ENSMUSG00000020362	ENSMUST00000145353	1.13792	1.28825	1.08293	1.16655
Snrpb2	ENSMUSG00000008333	ENSMUST00000139114	0.935386	1.34096	1.26517	1.16641
Zfp871	ENSMUSG00000024298	uc008bxm.1	1.1659	1.32729	1.02502	1.16624
Pctk2	ENSMUSG00000020015	ENSMUST00000069965	1.39372	1.11396	1.02112	1.16602
Asb13	ENSMUSG00000033781	uc007piz.1	0.992491	1.2153	1.31409	1.16594
Trnt1	ENSMUSG00000013736	ENSMUST00000113249	0.97708	1.38998	1.16672	1.16583
Cog4	ENSMUSG00000031753	ENSMUST00000034203	1.25958	1.08489	1.15879	1.16557
Zfp459	ENSMUSG00000055560	uc007rat.1	1.23197	0.957393	1.34243	1.16554
Cdkn1b	ENSMUSG00000003031	ENSMUST00000003115	0.937497	1.27677	1.32195	1.16528
Nfkb1	ENSMUSG00000028163	uc008rlx.1	1.01623	1.37026	1.13621	1.16525
Qk	ENSMUSG00000062078	ENSMUST00000097414	0.972206	1.24911	1.30241	1.16511
Fam179b	ENSMUSG00000035614	ENSMUST00000171824	1.36604	1.18616	0.97603	1.16508
Krr1	ENSMUSG00000063334	ENSMUST00000163048	0.959534	1.1178	1.47254	1.16456
Styx	ENSMUSG00000053205	uc007tgo.1	0.989431	1.32166	1.20742	1.16445
Golph3	ENSMUSG00000022200	ENSMUST00000165551	1.06378	1.15392	1.28593	1.16435
Gdap2	ENSMUSG00000027865	ENSMUST00000029459	1.37167	0.946273	1.21609	1.16433
Ncapd3	ENSMUSG00000035024	uc009oqh.1	1.22744	1.05692	1.21489	1.16375
Thumpd3	ENSMUSG00000030264	ENSMUST00000134657	0.945618	1.34997	1.2346	1.16374
Gmeb1	ENSMUSG00000028901	ENSMUST00000105965	1.23179	1.31382	0.973213	1.16348
mKIAA4051	ENSMUSG00000015522	ENSMUST00000090804	1.00559	1.22838	1.27233	1.16266
Exosc6	ENSMUSG00000031960	ENSMUST00000034441	1.32659	0.959175	1.23433	1.1624
Rint1	ENSMUSG00000028999	ENSMUST00000030852	1.30775	1.23704	0.969483	1.16185
Smcr7l	ENSMUSG00000022412	uc007wvk.1	1.27626	1.28489	0.956209	1.16177
Epha4	ENSMUSG00000026235	ENSMUST00000027451	1.48956	0.911773	1.15372	1.16149
Slx4	ENSMUSG00000039738	ENSMUST00000040790	1.47197	0.925018	1.15062	1.16143
Usp40	ENSMUSG00000005501	uc007bxy.1	1.20871	1.28774	1.00417	1.16052
Bard1	ENSMUSG00000026196	ENSMUST00000027393	1.13381	1.10223	1.25017	1.16037
Dcaf8	ENSMUSG00000026554	uc007dps.1	1.09569	1.14394	1.24631	1.16031
mKIAA4074	ENSMUSG00000056917	uc008gek.1	1.30904	1.02775	1.16047	1.16009
Skp2	ENSMUSG00000054115	ENSMUST00000096482	1.15667	1.11276	1.21177	1.1597
Ptp4a1	ENSMUSG00000026064	ENSMUST00000076587	1.33291	1.10702	1.0569	1.15966
Gpc3	ENSMUSG00000055653	ENSMUST00000069360	1.08246	1.21183	1.18838	1.1595
Wdr82	ENSMUSG00000020257	ENSMUST00000020490	1.05761	1.18375	1.2447	1.15936
Actr6	ENSMUSG00000019948	ENSMUST00000020109	1.15001	1.14947	1.17874	1.15933
Gm14288	ENSMUSG00000078901	uc008ofo.2	1.24247	1.10347	1.13569	1.15905
Tor1b	ENSMUSG00000026848	ENSMUST00000133544	0.999493	1.40845	1.10543	1.15882
Cdh2	ENSMUSG00000024304	ENSMUST00000025166	1.10547	1.44779	0.970856	1.15825
G5pr	ENSMUSG00000021022	ENSMUST00000021410	1.2085	1.14592	1.12173	1.15815
Txndc11	ENSMUSG00000022498	ENSMUST00000118362	1.15317	1.20591	1.11607	1.15779
Cog3	ENSMUSG00000034893	ENSMUST00000049168	1.33017	1.1103	1.04927	1.15721
Insig1	ENSMUSG00000045294	uc008wtu.1	1.24041	1.24731	1.00094	1.15695
Ccdc88c	ENSMUSG00000021182	uc007otc.1	1.1895	1.08328	1.20091	1.15666
Trim6	ENSMUSG00000072244	ENSMUST00000098180	1.18093	1.07977	1.21344	1.15662
Trim24	ENSMUSG00000029833	ENSMUST00000149828	1.1416	1.36899	0.989489	1.1564
Zmym3	ENSMUSG00000031310	ENSMUST00000121520	0.977908	1.15657	1.3657	1.15596
AK031165	ENSMUSG00000035632	ENSMUST00000143085	1.14389	1.06389	1.26805	1.15559
Gprasp1	ENSMUSG00000043384	ENSMUST00000113147	1.47984	1.10231	0.945872	1.15554
Ubxn2b	ENSMUSG00000028243	ENSMUST00000029907	0.994593	1.2151	1.27566	1.15522
Fmn2	ENSMUSG00000028354	ENSMUST00000030039	0.922859	1.39769	1.1951	1.15518
Slc7a6	ENSMUSG00000031904	uc009nfl.1	1.40582	0.976655	1.12107	1.15461
Rpa2	ENSMUSG00000028884	ENSMUST00000102561	1.31154	0.94124	1.24663	1.15453
Zcchc8	ENSMUSG00000029427	uc008zog.1	1.20277	1.09809	1.16347	1.15396
Mrpl43	ENSMUSG00000025208	ENSMUST00000097715	1.14616	1.24921	1.07196	1.1535
Tmem183a	ENSMUSG00000042305	uc007crr.1	1.31463	1.03142	1.12988	1.15281
Dcbld2	ENSMUSG00000035107	uc007znp.1	1.37268	1.14004	0.978279	1.15253
Hirip3	ENSMUSG00000042606	ENSMUST00000037248	1.136	1.05022	1.28231	1.15226
Sbno1	ENSMUSG00000038095	ENSMUST00000168651	1.27808	1.27711	0.936643	1.152
Ikbkap	ENSMUSG00000028431	ENSMUST00000030140	0.925795	1.11057	1.48544	1.15161
Atm	ENSMUSG00000034218	ENSMUST00000037440	0.945355	1.35039	1.19621	1.15156
Dclk2	ENSMUSG00000028078	uc008prp.2	1.22382	1.23702	1.00859	1.15151
Snx3	ENSMUSG00000019804	ENSMUST00000105499	0.966249	1.15943	1.36267	1.15144
Fbrsl1	ENSMUSG00000043323	ENSMUST00000069483	1.19881	1.33366	0.95455	1.15132
Zfand5	ENSMUSG00000024750	ENSMUST00000025659	1.1594	1.18911	1.10485	1.15059
Adck1	ENSMUSG00000021044	ENSMUST00000101165	1.10537	1.49773	0.919907	1.15052
Zfp518b	ENSMUSG00000046572	ENSMUST00000057258	1.2171	1.21118	1.03262	1.15034
Mtb	ENSMUSG00000042029	ENSMUST00000084828	1.09368	1.18368	1.17562	1.15027
Cope	ENSMUSG00000055681	ENSMUST00000140363	1.13658	1.07068	1.25062	1.15026
Ttc15	ENSMUSG00000020628	ENSMUST00000020954	1.26191	1.11979	1.07678	1.15018
Fnip2	ENSMUSG00000061175	uc008pno.1	0.97854	1.17494	1.32306	1.15007
Rad18	ENSMUSG00000030254	ENSMUST00000068487	1.00967	1.11033	1.35603	1.14983
Phf3	ENSMUSG00000048874	ENSMUST00000088310	1.03819	1.19682	1.22292	1.14966
Ikbip	ENSMUSG00000019975	uc007gtm.1	1.16548	1.3922	0.935547	1.14927
Tmem183a	ENSMUSG00000042305	ENSMUST00000049470	1.19983	1.23781	1.02154	1.14906
Arcn1	ENSMUSG00000032096	ENSMUST00000034607	1.00991	1.12939	1.32988	1.14898
Tsnax	ENSMUSG00000056820	ENSMUST00000075896	1.00192	1.24567	1.21519	1.14893
Srsf2	ENSMUSG00000034120	ENSMUST00000072341	1.32895	0.945811	1.20528	1.14851
Mapkapk5	ENSMUSG00000029454	ENSMUST00000031410	1.28793	1.15112	1.02137	1.14832
Jub	ENSMUSG00000022178	uc007twi.1	1.00181	1.11863	1.34912	1.14773
Ubr5	ENSMUSG00000037487	uc007vnm.1	1.13199	1.1161	1.19493	1.14718
Ddx42	ENSMUSG00000020705	uc007lyk.1	1.25232	1.16066	1.03671	1.14646
Mkln1	ENSMUSG00000025609	ENSMUST00000026699	1.07129	1.13584	1.23758	1.14622
Kif2a	ENSMUSG00000021693	ENSMUST00000042181	1.24201	1.062	1.14097	1.14597
Rnf19a	ENSMUSG00000022280	ENSMUST00000022890	1.19756	1.11617	1.1258	1.14594
Dnm2	ENSMUSG00000033335	uc009olj.1	0.925976	1.11597	1.45602	1.14588
Tmem50a	ENSMUSG00000028822	ENSMUST00000030626	0.965458	1.32893	1.17263	1.14586
1600027N09Rik	ENSMUSG00000027569	ENSMUST00000029085	1.18226	1.17396	1.08313	1.14556
Esrrb	ENSMUSG00000021255	uc007ohw.1	1.1147	1.2652	1.06522	1.1453
Taok3	ENSMUSG00000061288	ENSMUST00000111978	1.0352	1.16554	1.24503	1.14528
Ckap5	ENSMUSG00000040549	ENSMUST00000111338	1.1163	1.12083	1.19976	1.145
Mbtps1	ENSMUSG00000031835	uc009npt.1	1.02551	1.18053	1.23989	1.14498
Napg	ENSMUSG00000024581	ENSMUST00000025474	1.12885	1.3781	0.964773	1.14493
Pik3c2a	ENSMUSG00000030660	ENSMUST00000170430	1.34854	1.12062	0.992706	1.14476
Polr2g	ENSMUSG00000071662	ENSMUST00000096261	0.977588	1.23625	1.24075	1.14459
Gm14288	ENSMUSG00000078882	uc008ogp.2	1.24849	1.0672	1.12235	1.14354
Chchd3	ENSMUSG00000053768	ENSMUST00000066379	1.0555	1.18937	1.19075	1.1434
Dock9	ENSMUSG00000025558	uc007vak.1	1.26346	0.945448	1.2508	1.14322
4933433P14Rik	ENSMUSG00000044715	uc007oyr.1	1.11905	1.00109	1.33296	1.143
AK046225	ENSMUSG00000073393	uc008cql.1	1.14836	1.18196	1.09846	1.14241
Wdr75	ENSMUSG00000025995	ENSMUST00000154436	1.0662	1.13822	1.22622	1.14168
Mageh1	ENSMUSG00000047238	ENSMUST00000051484	1.25439	1.22549	0.966469	1.14107
Ankrd11	ENSMUSG00000035569	ENSMUST00000039345	1.22783	1.05986	1.14016	1.14056
Kif11	ENSMUSG00000012443	ENSMUST00000012587	1.08293	1.1297	1.20942	1.1395
Dars	ENSMUSG00000026356	uc007clp.1	0.935241	1.21735	1.29909	1.13936
Pard6b	ENSMUSG00000044641	ENSMUST00000052125	1.08219	1.13837	1.20005	1.13919
Pitpnb	ENSMUSG00000050017	ENSMUST00000086635	1.00394	1.31289	1.12142	1.13912
Ddx20	ENSMUSG00000027905	ENSMUST00000090680	1.21822	1.1025	1.09981	1.13887
Dnajc13	ENSMUSG00000032560	ENSMUST00000035170	1.02984	1.12948	1.26981	1.13884
Exd2	ENSMUSG00000032705	ENSMUST00000038185	0.934791	1.19619	1.32059	1.13875
Kpna4	ENSMUSG00000027782	ENSMUST00000029353	0.969937	1.16722	1.30405	1.13867
Thyn1	ENSMUSG00000035443	uc009oqa.1	1.06406	1.2574	1.10337	1.13864
Slc25a30	ENSMUSG00000022003	ENSMUST00000022580	1.01646	1.14535	1.26763	1.13852
Tia1	ENSMUSG00000071337	ENSMUST00000095752	1.28003	0.988218	1.16653	1.13847
Rbbp7	ENSMUSG00000031353	ENSMUST00000112327	0.916185	1.13609	1.41666	1.13821
Map3k1	ENSMUSG00000021754	ENSMUST00000022274	1.38742	0.945966	1.1227	1.13793
Ppp1r11	ENSMUSG00000036398	ENSMUST00000040402	1.2239	0.962565	1.25013	1.13774
Kbtbd8	ENSMUSG00000030031	uc009czw.2	1.09882	1.18639	1.12757	1.13702
Luc7l3	ENSMUSG00000020863	ENSMUST00000107821	1.19808	1.01659	1.20655	1.1369
Cttnbp2nl	ENSMUSG00000062127	ENSMUST00000098763	1.35501	1.10716	0.978764	1.13661
n/a	ENSMUSG00000053740	ENSMUST00000066378	0.924842	1.24704	1.27292	1.13653
Tacc1	ENSMUSG00000065954	ENSMUST00000084030	1.18855	1.00813	1.22302	1.13585
Paxip1	ENSMUSG00000002221	uc008wtr.1	1.01148	1.14079	1.26912	1.13559
Ndufa12	ENSMUSG00000020022	ENSMUST00000020209	0.948861	1.16289	1.32442	1.13481
Eif2c3	ENSMUSG00000028842	ENSMUST00000069097	1.2029	1.10778	1.09614	1.13462
Epb4.1l4a	ENSMUSG00000024376	uc008ejy.1	0.927701	1.29146	1.21885	1.13452
4930579G24Rik	ENSMUSG00000027811	ENSMUST00000029388	0.996551	1.30152	1.12563	1.13444
BC031181	ENSMUSG00000036299	uc008fpx.1	1.31168	1.18748	0.937141	1.13437
Nono	ENSMUSG00000031311	uc009txt.1	0.961134	1.31846	1.1517	1.13431
Rere	ENSMUSG00000039852	ENSMUST00000105682	1.23246	0.934953	1.26647	1.13427
Ubxn2a	ENSMUSG00000020634	ENSMUST00000141360	1.16581	0.981712	1.27372	1.13387
AK129341	ENSMUSG00000040729	ENSMUST00000037397	1.37289	1.11561	0.951573	1.13378
E2f7	ENSMUSG00000020185	ENSMUST00000073781	1.29248	0.950136	1.18652	1.13369
Itpk1	ENSMUSG00000057963	ENSMUST00000046518	1.14416	1.01848	1.24993	1.13355
Ccna2	ENSMUSG00000027715	uc008ozo.1	0.937178	1.20591	1.28529	1.13252
Paxip1	ENSMUSG00000002221	ENSMUST00000002291	0.999265	1.14163	1.27206	1.13215
Pi4k2a	ENSMUSG00000025178	ENSMUST00000066778	1.10563	1.2545	1.04617	1.13212
Nsun4	ENSMUSG00000028706	ENSMUST00000030475	1.02419	1.21064	1.16957	1.1319
Cdc23	ENSMUSG00000024370	uc008elb.1	0.916541	1.36864	1.15559	1.13175
Magi3	ENSMUSG00000052539	ENSMUST00000121198	1.01455	1.23081	1.16003	1.13147
D6Wsu163e	ENSMUSG00000030347	ENSMUST00000032497	0.975152	1.24595	1.19221	1.13147
Cdc42bpg	ENSMUSG00000024769	ENSMUST00000025681	1.18518	1.08786	1.12331	1.13141
Trip4	ENSMUSG00000032386	ENSMUST00000122410	1.0254	1.13963	1.23926	1.13138
Xpnpep3	ENSMUSG00000022401	ENSMUST00000163754	1.04434	1.17288	1.18225	1.13136
Csrnp2	ENSMUSG00000044636	ENSMUST00000061457	1.16392	0.928921	1.33758	1.13085
Ube3a	ENSMUSG00000025326	uc009hej.1	1.19374	0.964589	1.25591	1.13085
2410089E03Rik	ENSMUSG00000039801	ENSMUST00000110617	0.998337	1.30343	1.11121	1.1308
Nsd1	ENSMUSG00000021488	ENSMUST00000099490	1.00225	1.25663	1.14734	1.13055
Sip1	ENSMUSG00000060121	ENSMUST00000021379	1.00439	1.26237	1.13685	1.12961
Oip5	ENSMUSG00000072980	uc008ltz.1	0.979938	1.23307	1.19236	1.12945
Zfyve1	ENSMUSG00000042628	ENSMUST00000048319	0.939184	1.24443	1.23224	1.12929
Max	ENSMUSG00000059436	ENSMUST00000110395	1.11187	1.23436	1.04792	1.12878
Rpp25	ENSMUSG00000062309	ENSMUST00000080514	0.937166	1.28753	1.19025	1.12825
2700050L05Rik	ENSMUSG00000039990	ENSMUST00000043609	1.36506	0.941991	1.11648	1.12811
Ddx11	ENSMUSG00000035842	uc008dhb.1	1.18943	1.14753	1.05068	1.12769
n/a	ENSMUSG00000078134	ENSMUST00000104933	1.09506	1.15864	1.12857	1.12713
n/a	ENSMUSG00000048188	ENSMUST00000062242	1.14316	1.18274	1.05831	1.12686
mKIAA4252	ENSMUSG00000033943	ENSMUST00000046717	1.1139	1.05908	1.2052	1.12446
Opa1	ENSMUSG00000038084	ENSMUST00000160597	1.08576	1.17545	1.11394	1.12443
Fbxo8	ENSMUSG00000038206	ENSMUST00000040218	1.25435	1.0239	1.10492	1.12375
Zc3h7a	ENSMUSG00000037965	ENSMUST00000037633	1.2142	1.15434	1.01202	1.12358
Kdelc1	ENSMUSG00000026047	ENSMUST00000065767	1.32574	0.933394	1.14407	1.12286
Cab39	ENSMUSG00000036707	ENSMUST00000113360	1.11897	1.23643	1.0214	1.12218
Mtfmt	ENSMUSG00000059183	ENSMUST00000074792	1.00974	1.19005	1.17498	1.12185
Rfc5	ENSMUSG00000029363	ENSMUST00000086461	1.14709	1.07907	1.1405	1.1218
Bzw1	ENSMUSG00000051223	uc007bbq.1	0.946054	1.28317	1.16284	1.12178
mKIAA4252	ENSMUSG00000033943	uc008luv.1	1.28043	0.983419	1.12069	1.12166
En2	ENSMUSG00000039095	ENSMUST00000036177	0.909768	1.1798	1.31462	1.12162
Ttc1	ENSMUSG00000041278	ENSMUST00000048578	1.10361	1.14666	1.11474	1.12152
Rps6kb1	ENSMUSG00000020516	ENSMUST00000154617	0.962762	1.19452	1.22536	1.12114
Safb2	ENSMUSG00000042625	ENSMUST00000134741	0.986654	1.19945	1.18875	1.1205
Cpt1c	ENSMUSG00000007783	ENSMUST00000063761	1.19065	1.26809	0.931752	1.1205
Usp7	ENSMUSG00000022710	ENSMUST00000160405	0.959294	1.21352	1.2084	1.12048
Adar	ENSMUSG00000027951	ENSMUST00000098924	1.21901	1.02542	1.1241	1.12005
Ccdc6	ENSMUSG00000048701	ENSMUST00000147545	1.11806	1.20104	1.04618	1.11998
Tm7sf3	ENSMUSG00000040234	ENSMUST00000037709	0.990059	1.16044	1.22214	1.11979
Hdlbp	ENSMUSG00000034088	uc007cdz.1	1.03748	1.15267	1.17397	1.11973
4930432K21Rik	ENSMUSG00000008129	ENSMUST00000118856	1.24267	0.940949	1.2005	1.11968
Rbm41	ENSMUSG00000031433	ENSMUST00000096311	1.19424	0.920616	1.27673	1.11967
Chordc1	ENSMUSG00000001774	ENSMUST00000001825	1.07314	1.1321	1.15506	1.11956
Pacrgl	ENSMUSG00000029089	ENSMUST00000030968	1.19218	1.12048	1.04944	1.11918
Atg4b	ENSMUSG00000026280	ENSMUST00000027502	1.13414	1.06763	1.15751	1.11911
0610007P22Rik	ENSMUSG00000015126	ENSMUST00000063574	1.2473	1.18683	0.946237	1.11889
Wasl	ENSMUSG00000029684	uc009bbv.1	1.12213	1.0725	1.16251	1.11844
Ddx55	ENSMUSG00000029389	ENSMUST00000131631	1.14598	1.01466	1.20309	1.1184
Acot8	ENSMUSG00000017307	uc008nwe.1	1.28587	0.987173	1.10193	1.11836
Enah	ENSMUSG00000022995	ENSMUST00000078719	1.18498	1.11023	1.06185	1.11788
Atpaf1	ENSMUSG00000028710	ENSMUST00000030478	1.00752	1.16209	1.19281	1.11778
Rap1b	ENSMUSG00000052681	uc007hdr.1	1.01486	1.17426	1.16952	1.11702
Ankhd1	ENSMUSG00000024483	ENSMUST00000142977	0.9549	1.31167	1.11258	1.11696
Gm14420	ENSMUSG00000078866	ENSMUST00000099002	1.26193	1.18085	0.934139	1.11655
Timm23	ENSMUSG00000013701	ENSMUST00000170331	1.18207	1.0631	1.10569	1.11588
Sh3gl1	ENSMUSG00000003200	uc008daq.1	1.20561	1.1444	1.0057	1.11537
Tmtc3	ENSMUSG00000036676	ENSMUST00000058154	1.05575	1.1339	1.15867	1.11523
Mfap1b	ENSMUSG00000048222	ENSMUST00000056732	1.12189	1.19352	1.03569	1.11516
Zfp52	ENSMUSG00000051341	ENSMUST00000079242	1.21935	1.21142	0.938626	1.11508
Appbp2	ENSMUSG00000018481	ENSMUST00000018625	0.946522	1.21415	1.20373	1.11424
Pik3cb	ENSMUSG00000032462	ENSMUST00000035037	1.05213	1.1206	1.1714	1.11363
Bclaf1	ENSMUSG00000037608	ENSMUST00000100045	1.28088	0.954621	1.12928	1.11356
Slc25a13	ENSMUSG00000015112	uc009awq.1	1.11099	1.00673	1.23369	1.1133
2610015P09Rik	ENSMUSG00000022701	ENSMUST00000122014	1.13268	1.24274	0.978726	1.11271
Gtf2h2	ENSMUSG00000021639	ENSMUST00000066940	1.02104	1.16777	1.15542	1.11271
AK037026	ENSMUSG00000047789	ENSMUST00000052514	0.972847	1.1691	1.20947	1.11215
Dhx15	ENSMUSG00000029169	ENSMUST00000031061	1.17792	1.05808	1.10164	1.11145
Zfp180	ENSMUSG00000057101	ENSMUST00000068975	1.05881	1.14594	1.13139	1.11138
Ttk	ENSMUSG00000038379	ENSMUST00000070326	1.04149	1.15124	1.14447	1.11124
Rnf167	ENSMUSG00000040746	ENSMUST00000037534	0.959145	1.24022	1.15263	1.11094
Srsf3	ENSMUSG00000071172	ENSMUST00000130216	1.07235	1.11441	1.14632	1.11061
Ltn1	ENSMUSG00000052299	ENSMUST00000039449	1.14741	1.16907	1.02079	1.11045
ubin	ENSMUSG00000008604	ENSMUST00000008748	0.990646	1.16185	1.18588	1.10927
2810407C02Rik	ENSMUSG00000075700	ENSMUST00000107924	1.11296	1.33801	0.916233	1.10913
AK158379	ENSMUSG00000039067	ENSMUST00000044106	0.945855	1.1118	1.29729	1.10908
Oas2	ENSMUSG00000032690	ENSMUST00000053909	1.10602	1.29558	0.952041	1.10907
Sephs1	ENSMUSG00000026662	ENSMUST00000027973	0.958499	1.14844	1.23922	1.10905
Slc35a3	ENSMUSG00000027957	ENSMUST00000029569	0.91251	1.24859	1.19674	1.10888
Ktn1	ENSMUSG00000021843	uc007tiq.1	1.06096	1.15015	1.11601	1.10843
Ptar1	ENSMUSG00000074925	ENSMUST00000099560	1.12102	1.11176	1.09149	1.10802
Dpy19l4	ENSMUSG00000045205	ENSMUST00000084892	1.04344	1.16898	1.11497	1.10793
Fam168a	ENSMUSG00000029461	ENSMUST00000107042	1.10128	0.995381	1.23806	1.10716
Fancd2	ENSMUSG00000034023	ENSMUST00000036340	1.07732	1.14215	1.10252	1.10701
Actr3	ENSMUSG00000026341	ENSMUST00000027579	1.07864	1.11296	1.12983	1.10694
mKIAA1606	ENSMUSG00000054199	uc008pxb.1	1.15301	1.11573	1.05411	1.10686
Tle3	ENSMUSG00000032280	uc009pzq.1	1.26949	1.12774	0.946815	1.10671
Gcap14	ENSMUSG00000058690	ENSMUST00000090024	1.03299	1.12618	1.16516	1.1067
Fam192a	ENSMUSG00000031774	uc009mwn.1	1.17783	1.04121	1.10378	1.1062
Cep192	ENSMUSG00000024542	ENSMUST00000025425	0.936126	1.1579	1.24861	1.10614
nek2	ENSMUSG00000026622	ENSMUST00000027931	1.01528	1.1889	1.11863	1.10528
Pygo2	ENSMUSG00000047824	uc008pzq.1	1.05479	1.10766	1.15558	1.10524
Rnf13	ENSMUSG00000036503	uc008phj.1	1.15707	1.124	1.03785	1.10515
M6pr	ENSMUSG00000007458	ENSMUST00000123093	1.10619	1.08967	1.11922	1.10496
Zfp207	ENSMUSG00000017421	uc007kly.1	0.987961	1.17451	1.16204	1.10477
Ubr5	ENSMUSG00000037487	uc007vnp.1	1.06596	1.13105	1.11832	1.10475
Cul4b	ENSMUSG00000031095	ENSMUST00000115118	1.0109	1.19395	1.11472	1.10396
Snrnp70	ENSMUSG00000063511	uc009gux.1	1.10863	1.25819	0.963818	1.10368
9430015G10Rik	ENSMUSG00000059939	ENSMUST00000125786	1.14427	1.06428	1.10261	1.10324
Cenpe	ENSMUSG00000045328	ENSMUST00000062893	0.974927	1.18169	1.16533	1.10317
Ddx19a	ENSMUSG00000015023	uc009nll.1	1.16044	0.911157	1.26833	1.10277
n/a	ENSMUSG00000071748	ENSMUST00000096420	0.979328	1.20409	1.137	1.10268
mKIAA1835	ENSMUSG00000022391	ENSMUST00000052374	1.01667	1.13256	1.16044	1.10143
Dis3	ENSMUSG00000033166	ENSMUST00000068042	1.14972	1.00248	1.15926	1.10141
Brca2	ENSMUSG00000041147	uc009aty.1	0.910715	1.26711	1.1565	1.10098
2012-03-07	ENSMUSG00000026977	uc008jua.1	1.10165	1.01405	1.19159	1.10005
Mtpap	ENSMUSG00000024234	ENSMUST00000025077	1.2344	0.933912	1.15282	1.09945
Daxx	ENSMUSG00000002307	ENSMUST00000079421	1.27144	1.12085	0.929748	1.09834
9130011J15Rik	ENSMUSG00000044600	ENSMUST00000167290	1.01464	1.16889	1.11512	1.09766
Yme1l1	ENSMUSG00000026775	ENSMUST00000149240	1.10181	1.04401	1.14823	1.09719
Fem1c	ENSMUSG00000033319	ENSMUST00000036226	1.05442	1.10216	1.13596	1.097
Naa10	ENSMUSG00000031388	ENSMUST00000114387	1.13834	0.971411	1.19302	1.09675
Rnf2	ENSMUSG00000026484	ENSMUST00000076110	0.928325	1.12393	1.26167	1.09596
Haus6	ENSMUSG00000038047	ENSMUST00000128381	0.937701	1.21481	1.15257	1.095
Dus4l	ENSMUSG00000020648	ENSMUST00000020977	1.19819	0.966579	1.13243	1.0946
Gjb3	ENSMUSG00000042367	ENSMUST00000106091	0.98218	1.20901	1.10418	1.09451
Kdm4a	ENSMUSG00000033326	ENSMUST00000106406	0.997828	1.10696	1.18505	1.09389
Atg4d	ENSMUSG00000002820	ENSMUST00000065005	0.991823	1.13634	1.15835	1.09293
Bri3	ENSMUSG00000047843	ENSMUST00000110695	0.93049	1.1994	1.16192	1.09048
Mcm8	ENSMUSG00000027353	ENSMUST00000028831	1.14514	1.15755	0.97761	1.09024
n/a	Alms1	uc009cqe.1	0.952042	1.12393	1.20912	1.08965
Ddx6	ENSMUSG00000032097	ENSMUST00000098836	1.14213	1.10005	1.02907	1.08941
Taf2	ENSMUSG00000037343	ENSMUST00000041733	1.11758	1.11212	1.03842	1.08877
Btbd9	ENSMUSG00000062202	ENSMUST00000079924	1.19297	1.17212	0.919872	1.08754
Ccdc59	ENSMUSG00000019897	ENSMUST00000133538	1.01083	1.13626	1.1169	1.08657
Fam164a	ENSMUSG00000043542	ENSMUST00000051064	1.11453	1.16203	0.988373	1.08579
Mrpl4	ENSMUSG00000003299	uc009oju.1	0.920295	1.17805	1.17952	1.08542
Polr1b	ENSMUSG00000027395	uc008mhf.1	1.1537	0.942342	1.17488	1.08501
Smc6	ENSMUSG00000020608	ENSMUST00000020931	1.11306	1.10677	1.03633	1.08482
Slc4a5	ENSMUSG00000068323	uc009cnd.1	1.07007	1.0855	1.0956	1.08367
Lrp8	ENSMUSG00000028613	ENSMUST00000030356	0.922344	1.24299	1.10988	1.08362
Hnrnpu	ENSMUSG00000039630	ENSMUST00000037748	0.990257	1.10558	1.15975	1.08285
Eya3	ENSMUSG00000028886	ENSMUST00000157029	1.12075	1.0008	1.12818	1.08163
Nuf2	ENSMUSG00000026683	ENSMUST00000111368	0.911062	1.12084	1.2364	1.08081
Twf1	ENSMUSG00000022451	uc007xjl.1	0.996118	1.14347	1.10769	1.08057
Camsap1l1	ENSMUSG00000041570	ENSMUST00000094523	0.992277	1.10327	1.15226	1.08049
Trim37	ENSMUSG00000018548	ENSMUST00000092807	1.11193	0.920028	1.23282	1.08042
C330021F23Rik	ENSMUSG00000065952	ENSMUST00000136592	1.12393	1.16424	0.962983	1.08011
1810030O07Rik	ENSMUSG00000044148	ENSMUST00000060108	1.15933	0.922724	1.16665	1.07665
Rpl32	ENSMUSG00000057841	ENSMUST00000081840	1.10339	0.988985	1.13985	1.07545
Xpo7	ENSMUSG00000022100	ENSMUST00000022696	0.968071	1.13299	1.13346	1.07526
Nap1l4	ENSMUSG00000059119	ENSMUST00000169467	0.978318	1.14434	1.1102	1.07517
Strap	ENSMUSG00000030224	ENSMUST00000064910	0.915374	1.18338	1.14583	1.07468
Tcerg1	ENSMUSG00000024498	ENSMUST00000115545	1.10236	0.945697	1.18929	1.07429
Cdr2	ENSMUSG00000030878	ENSMUST00000033169	0.973268	1.14853	1.10855	1.0741
Ube2d2	ENSMUSG00000091896	ENSMUST00000170693	1.10061	1.1085	1.01485	1.0738
Tm9sf1	ENSMUSG00000002320	ENSMUST00000121791	0.930674	1.17945	1.12586	1.07313
AK209647	ENSMUSG00000067194	ENSMUST00000087143	0.933798	1.14903	1.14328	1.07048
Prpf38b	ENSMUSG00000027881	ENSMUST00000145720	0.915086	1.17469	1.13433	1.06834
Klf9	ENSMUSG00000033863	ENSMUST00000036884	0.950656	1.14689	1.11632	1.06769
Nufip1	ENSMUSG00000022009	ENSMUST00000022586	1.14064	0.947642	1.11502	1.06421
Arih1	ENSMUSG00000025234	ENSMUST00000171975	1.15399	0.937121	1.11128	1.06318
Eif2ak1	ENSMUSG00000029613	ENSMUST00000100487	1.01273	1.08842	1.08912	1.06281
Tgif2	ENSMUSG00000062175	ENSMUST00000073352	0.951876	1.12065	1.12381	1.0623
Nid2	ENSMUSG00000021806	ENSMUST00000022340	1.01211	1.09634	1.07922	1.06193
Fzd5	ENSMUSG00000045005	uc007bgz.1	1.06085	1.03693	1.08209	1.05979
mKIAA1524	ENSMUSG00000033031	ENSMUST00000048374	1.03268	1.09617	1.05137	1.05974
Rapgef1	ENSMUSG00000039844	uc008izw.1	1.02404	1.09184	1.06237	1.05905
Rab7	ENSMUSG00000079477	ENSMUST00000113596	1.06766	1.01016	1.09614	1.05738
Gfm2	ENSMUSG00000021666	ENSMUST00000159321	1.10134	0.915928	1.16998	1.05679
Gpatch2	ENSMUSG00000039210	uc007dzy.1	1.12377	1.10205	0.95184	1.05636
Tbcd	ENSMUSG00000039230	uc007mvy.1	1.12303	1.14518	0.9128	1.05491
Rmnd1	ENSMUSG00000050904	uc008guv.1	1.09786	0.998129	1.07025	1.05457
Ints8	ENSMUSG00000040738	ENSMUST00000108319	1.11296	0.936893	1.12	1.05308
Parn	ENSMUSG00000022685	ENSMUST00000058884	1.09943	1.07886	0.982033	1.05217
Fancg	ENSMUSG00000028453	ENSMUST00000030165	0.929209	1.13349	1.10505	1.05189
Mtdh	ENSMUSG00000022255	ENSMUST00000022865	1.07039	1.00022	1.07728	1.04871
n/a	ENSMUSG00000078139	ENSMUST00000104942	1.00434	1.06787	1.07141	1.04741
Wdr36	ENSMUSG00000038299	ENSMUST00000166214	1.07178	0.99391	1.07245	1.04539
Usp7	ENSMUSG00000022710	uc007ycy.1	0.998901	1.06861	1.06787	1.04461
Zc3h13	ENSMUSG00000022000	ENSMUST00000165404	1.06395	1.03003	1.03711	1.0436
Wdvcf	ENSMUSG00000086965	ENSMUST00000146673	1.09929	0.970625	1.06204	1.04256
5930416I19Rik	ENSMUSG00000048668	ENSMUST00000112152	0.978994	1.0521	1.09973	1.04242
Rock1	ENSMUSG00000024290	ENSMUST00000067947	1.02766	1.07284	1.02583	1.04189
Usp6nl	ENSMUSG00000039046	ENSMUST00000114937	0.982473	1.0509	1.09309	1.04115
Exoc4	ENSMUSG00000029763	ENSMUST00000052266	1.04714	1.06924	0.998797	1.03797
Csrp2	ENSMUSG00000020186	ENSMUST00000171226	0.95025	1.07562	1.09278	1.03755
Dlg3	ENSMUSG00000000881	ENSMUST00000151020	1.02486	1.06135	1.02599	1.03726
Myst4	ENSMUSG00000021767	ENSMUST00000069648	1.02114	1.075	1.01379	1.03629
Tmem55b	ENSMUSG00000035953	ENSMUST00000049312	1.06594	1.07426	0.970626	1.03585
Pdlim5	ENSMUSG00000028273	ENSMUST00000029941	1.08098	1.0648	0.96429	1.03538
Gtf3c2	ENSMUSG00000029144	ENSMUST00000043161	1.06674	1.08331	0.958756	1.03476
Efna2	ENSMUSG00000003070	ENSMUST00000003154	1.06693	1.01846	1.01584	1.03348
Rfc2	ENSMUSG00000023104	ENSMUST00000023867	1.05243	1.07343	0.974743	1.03265
Ckap2l	ENSMUSG00000048327	ENSMUST00000052708	1.01472	1.00752	1.07599	1.03229
Adh5	ENSMUSG00000028138	ENSMUST00000005964	1.04098	0.961399	1.09171	1.02995
Scaf11	ENSMUSG00000033228	ENSMUST00000047835	1.00157	0.988809	1.09756	1.02819
Prkrir	ENSMUSG00000030753	ENSMUST00000126356	1.09483	0.909215	1.09116	1.02794
Hnrnph2	ENSMUSG00000045427	ENSMUST00000074950	1.09866	0.915236	1.07862	1.02744
Fn1	ENSMUSG00000026193	ENSMUST00000087254	1.08628	1.08696	0.9174	1.027
Rufy3	ENSMUSG00000029291	ENSMUST00000101048	1.01736	1.01656	1.04703	1.02688
Lig3	ENSMUSG00000020697	uc007knd.1	0.977115	1.04841	1.05362	1.02578
2310022A10Rik	ENSMUSG00000049643	ENSMUST00000067386	1.08017	0.942075	1.06039	1.02568
Uqcrb	ENSMUSG00000021520	ENSMUST00000021993	0.950526	1.03672	1.09415	1.02542
2700097O09Rik	ENSMUSG00000062198	ENSMUST00000021406	1.07182	0.929737	1.07622	1.02359
BC018507	ENSMUSG00000034525	ENSMUST00000043493	0.962597	1.02483	1.08649	1.02339
Ghdc	ENSMUSG00000017747	ENSMUST00000017891	1.05259	0.981142	1.03716	1.02317
Gspt1	ENSMUSG00000062203	ENSMUST00000163429	0.970969	1.03851	1.05967	1.02234
EF437385	ENSMUSG00000049647	uc007hys.1	0.999622	1.07983	0.987976	1.02168
Wbp4	ENSMUSG00000022023	ENSMUST00000022601	1.05158	1.01466	0.999341	1.02163
9430023L20Rik	ENSMUSG00000037204	ENSMUST00000048393	0.991942	1.05649	1.01427	1.02055
Taf1	ENSMUSG00000031314	ENSMUST00000118878	1.08559	0.99831	0.97981	1.02021
Bat1a	ENSMUSG00000019432	uc008chc.1	1.09725	1.0139	0.952912	1.01965
Map4k2	ENSMUSG00000024948	ENSMUST00000025897	1.01423	1.08609	0.961	1.01916
Rab33b	ENSMUSG00000027739	uc008pea.1	0.9735	1.05417	1.03055	1.01884
Arid1a	ENSMUSG00000007880	uc008vdj.1	0.988471	1.04099	1.02714	1.01862
Csnk1g3	ENSMUSG00000073563	ENSMUST00000069597	1.04213	0.970824	1.04034	1.01721
Adpgk	ENSMUSG00000025236	uc009pxq.1	1.07889	0.932378	1.04626	1.01719
Tars2	ENSMUSG00000028107	uc008qkq.1	0.939376	1.08305	1.02974	1.01564
G6pc3	ENSMUSG00000034793	ENSMUST00000070334	1.0655	1.05546	0.93134	1.01555
Ddx1	ENSMUSG00000037149	uc007nbh.1	1.01466	0.984742	1.04581	1.01477
Arhgef12	ENSMUSG00000059495	ENSMUST00000165665	0.969297	1.02734	1.04905	1.01466
Tomm70a	ENSMUSG00000022752	ENSMUST00000166897	0.945955	1.0191	1.08299	1.01447
Fktn	ENSMUSG00000028414	ENSMUST00000128667	1.06562	0.993553	0.985989	1.01443
Msh6	ENSMUSG00000005370	ENSMUST00000005503	0.957876	1.01873	1.06956	1.01436
Zfp825	ENSMUSG00000069208	uc007rfh.1	1.01049	0.985897	1.04669	1.01405
Xrcc1	ENSMUSG00000051768	ENSMUST00000063249	1.05432	0.95076	1.03705	1.01301
Pik3r4	ENSMUSG00000032571	ENSMUST00000065778	1.01375	1.05473	0.972095	1.01297
Tbl1x	ENSMUSG00000025246	ENSMUST00000088217	0.969043	1.08853	0.985154	1.01289
Nsun2	ENSMUSG00000021595	ENSMUST00000109699	1.02121	0.985178	1.03201	1.0126
Tbck	ENSMUSG00000028030	ENSMUST00000169172	1.05206	1.08202	0.911846	1.01251
Grlf1	ENSMUSG00000058230	ENSMUST00000171937	1.03127	0.964146	1.04342	1.01234
Atxn2	ENSMUSG00000042605	ENSMUST00000168865	0.956838	0.996476	1.08473	1.01129
Stat4	ENSMUSG00000062939	ENSMUST00000168302	1.05482	0.96683	1.01272	1.01082
Th1l	ENSMUSG00000016253	ENSMUST00000109075	0.972484	1.05769	1.00325	1.01053
Dact2	ENSMUSG00000048826	ENSMUST00000053218	1.04163	1.02223	0.968159	1.01019
Srgap2	ENSMUSG00000026425	ENSMUST00000027683	0.948996	1.03223	1.05236	1.01019
1110059E24Rik	ENSMUSG00000035171	ENSMUST00000038830	0.931686	1.06822	1.03438	1.00973
Xpo7	ENSMUSG00000022100	uc007uov.1	1.05066	0.960956	1.01944	1.00966
Rap1a	ENSMUSG00000068798	ENSMUST00000090678	0.98852	1.01608	1.0245	1.00958
Blnk	ENSMUSG00000061132	ENSMUST00000117695	1.02918	0.955248	1.04602	1.00937
Eif1ad	ENSMUSG00000024841	ENSMUST00000025759	1.00947	0.982287	1.03568	1.00891
Rad1	ENSMUSG00000022248	uc007vgh.1	0.972199	0.958083	1.09759	1.00739
Hira	ENSMUSG00000022702	ENSMUST00000004222	0.976193	1.0551	0.992336	1.00731
Rad54b	ENSMUSG00000078773	ENSMUST00000108306	1.01616	0.987098	1.01892	1.00729
Ap1ar	ENSMUSG00000074238	ENSMUST00000051737	1.08736	1.01422	0.926357	1.00715
mKIAA0532	ENSMUSG00000037646	ENSMUST00000048646	0.979459	1.04725	0.994301	1.00659
Usp35	ENSMUSG00000035713	ENSMUST00000168435	1.0368	0.963187	1.02084	1.00644
Dutp	ENSMUSG00000027203	ENSMUST00000082122	0.933725	1.07732	1.01155	1.00581
Tm2d1	ENSMUSG00000028563	uc008tua.1	1.01385	0.958719	1.04646	1.00569
Gm1943	ENSMUSG00000039828	ENSMUST00000045766	1.06847	0.978506	0.9724	1.00552
Sdhaf1	ENSMUSG00000074211	ENSMUST00000098586	1.09884	0.965642	0.955109	1.00447
Fam98a	ENSMUSG00000002017	ENSMUST00000112507	0.963069	0.962612	1.09315	1.00445
Spast	ENSMUSG00000024068	ENSMUST00000024869	1.07066	0.962972	0.982681	1.00437
Hmg20a	ENSMUSG00000032329	uc009pte.1	0.916912	1.03405	1.06831	1.00428
Mlf2	ENSMUSG00000030120	uc009dsp.1	0.945665	1.0535	1.01639	1.00418
Ldlr	ENSMUSG00000032193	uc009omj.1	0.909442	1.03291	1.07475	1.00319
Eif3e	ENSMUSG00000022336	ENSMUST00000022960	0.915759	1.01381	1.0856	1.00262
Pop4	ENSMUSG00000030423	ENSMUST00000032585	1.06197	0.958696	0.989719	1.00254
Cnn3	ENSMUSG00000053931	ENSMUST00000029773	1.00355	1.08721	0.922226	1.00207
Exoc3	ENSMUSG00000034152	ENSMUST00000035934	0.945509	0.981365	1.08242	1.00145
Tmco1	ENSMUSG00000052428	ENSMUST00000097473	1.05869	1.00256	0.945339	1.00113
mKIAA0008	ENSMUSG00000037544	ENSMUST00000043296	1.08316	0.94879	0.975106	1.0007
VAV2	ENSMUSG00000009621	ENSMUST00000056176	1.00016	1.04537	0.95768	1.00043
Ninl	ENSMUSG00000068115	ENSMUST00000109896	1.00518	1.02722	0.968664	1.00006
Tbpl1	ENSMUSG00000071359	ENSMUST00000095794	1.08656	0.966387	0.952171	0.999937
Cops2	ENSMUSG00000027206	ENSMUST00000028635	1.01552	1.00301	0.98093	0.999716
Elp2	ENSMUSG00000024271	ENSMUST00000025120	0.927438	1.07621	1.00053	0.999551
Gtsf1l	ENSMUSG00000070708	uc008nsm.1	1.08797	0.918847	0.994299	0.997988
Pign	ENSMUSG00000056536	uc007cgf.1	1.00969	1.00931	0.975085	0.997895
Ern1	ENSMUSG00000020715	ENSMUST00000001059	1.01272	0.99226	0.987098	0.997298
Srp68	ENSMUSG00000020780	ENSMUST00000021133	1.02795	0.93755	1.0276	0.996771
Dgat1	ENSMUSG00000022555	ENSMUST00000023214	0.996821	0.931278	1.0656	0.996392
Snx25	ENSMUSG00000038291	ENSMUST00000170416	1.00528	1.03831	0.947327	0.996257
Rasa4	ENSMUSG00000004952	ENSMUST00000042135	1.03377	0.947785	1.0083	0.995957
Ptplb	ENSMUSG00000035376	ENSMUST00000061156	1.0852	0.9099	0.997778	0.995053
Cct2	ENSMUSG00000034024	ENSMUST00000047672	0.917446	1.0174	1.05439	0.994699
Gnl3	ENSMUSG00000042354	uc007swi.1	0.968367	0.924269	1.09789	0.994182
Stx6	ENSMUSG00000026470	ENSMUST00000027743	1.04308	0.964435	0.976448	0.994061
Cst3	ENSMUSG00000027447	ENSMUST00000028938	0.92752	1.02435	1.03386	0.994055
Pick1	ENSMUSG00000068206	ENSMUST00000169548	0.980305	1.06669	0.939122	0.993973
Trmt11	ENSMUSG00000019792	ENSMUST00000019927	1.07492	0.910656	1.0008	0.993177
Znrd1	ENSMUSG00000036315	uc008clp.1	1.00424	0.91091	1.07094	0.993176
Ncbp1	ENSMUSG00000028330	ENSMUST00000030014	0.953694	0.994436	1.03291	0.993154
Dcun1d5	ENSMUSG00000032002	ENSMUST00000034499	0.947633	0.998536	1.03521	0.99314
Ipo8	ENSMUSG00000040029	uc009etn.1	1.06332	1.00966	0.911592	0.992839
Ddah1	ENSMUSG00000028194	ENSMUST00000120310	0.975854	0.942894	1.06337	0.992758
Manf	ENSMUSG00000032575	ENSMUST00000069036	0.913773	0.990923	1.08011	0.992618
Tbrg1	ENSMUSG00000011114	uc009ovh.1	0.977283	1.0358	0.965974	0.992555
Fip1l1	ENSMUSG00000029227	ENSMUST00000121950	0.975192	0.913782	1.09332	0.99135
Ado	ENSMUSG00000057134	ENSMUST00000075686	0.955673	0.979894	1.03838	0.990714
Gfer	ENSMUSG00000040888	ENSMUST00000046839	0.978406	0.931266	1.06707	0.990668
Hectd1	ENSMUSG00000035247	ENSMUST00000042052	0.996536	0.946919	1.02955	0.990418
Zdbf2	ENSMUSG00000027520	ENSMUST00000114132	0.961866	0.957533	1.05437	0.990271
Dbnl	ENSMUSG00000020476	ENSMUST00000020769	0.979161	0.990535	0.9995	0.989697
Cyhr1	ENSMUSG00000053929	uc007wlg.1	0.99339	0.978028	0.997639	0.98965
Cdc40	ENSMUSG00000038446	uc007exe.1	0.993959	0.956774	1.0176	0.989126
Sec61a2	ENSMUSG00000025816	uc008ify.1	0.931772	0.966512	1.07426	0.989027
Rab14	ENSMUSG00000026878	ENSMUST00000028238	0.958824	0.993027	1.01586	0.988959
Bap1	ENSMUSG00000021901	ENSMUST00000022458	1.00757	0.959521	1.00013	0.988848
Mtmr6	ENSMUSG00000021987	ENSMUST00000022563	0.953299	1.02464	0.98586	0.987502
Apobec3	ENSMUSG00000009585	ENSMUST00000165537	0.952382	1.07233	0.938415	0.985928
Atp6v1h	ENSMUSG00000033793	ENSMUST00000044369	1.00253	1.03478	0.923556	0.985832
Apex1	ENSMUSG00000035960	ENSMUST00000049411	1.08546	0.916076	0.96208	0.985338
Lrch1	ENSMUSG00000068015	ENSMUST00000088970	1.0019	1.0271	0.927591	0.984611
Cars2	ENSMUSG00000056228	uc009kvi.1	0.932987	1.00427	1.01872	0.9846
Nup107	ENSMUSG00000052798	ENSMUST00000064848	0.984747	0.921422	1.05178	0.984547
Ash1l	ENSMUSG00000028053	uc008pxj.1	0.958614	0.981053	1.0136	0.984166
Hdac3	ENSMUSG00000024454	uc008erl.1	0.962302	0.998389	0.991824	0.984046
Gfpt2	ENSMUSG00000020363	ENSMUST00000020629	1.00347	0.93743	1.0128	0.983984
Eprs	ENSMUSG00000026615	ENSMUST00000046514	0.939585	0.967398	1.04625	0.98339
Med17	ENSMUSG00000031935	uc009ofl.1	0.933675	0.965721	1.05125	0.982316
Zdhhc15	ENSMUSG00000033906	ENSMUST00000042070	1.03403	0.910673	1.00626	0.982206
U2af1	ENSMUSG00000061613	ENSMUST00000014684	1.07849	0.925759	0.948955	0.982171
Ankrd17	ENSMUSG00000055204	ENSMUST00000081914	1.07273	0.917461	0.96204	0.981953
Paics	ENSMUSG00000029247	ENSMUST00000117536	0.931806	1.01011	1.00519	0.981704
Ralgapa1	ENSMUSG00000021027	uc007nou.1	1.07161	0.948912	0.930113	0.981597
Hbs1l	ENSMUSG00000019977	ENSMUST00000020153	0.970757	1.06142	0.916384	0.98105
SASH1	ENSMUSG00000015305	ENSMUST00000015449	1.0993	0.933168	0.919007	0.98054
Pdhb	ENSMUSG00000021748	ENSMUST00000022268	0.950912	0.936524	1.05381	0.979055
Mdc1	ENSMUSG00000061607	uc008cir.1	0.942254	0.968263	1.02564	0.978105
Stk11ip	ENSMUSG00000026213	ENSMUST00000113553	0.918056	1.00294	1.0156	0.977887
Mta3	ENSMUSG00000055817	uc008dsg.1	1.03243	0.936583	0.964644	0.977068
Nedd4	ENSMUSG00000032216	uc009qqf.1	0.980075	0.921322	1.03044	0.976259
Hspbp1	ENSMUSG00000063802	ENSMUST00000079970	1.07786	0.947406	0.909567	0.975689
Nol7	ENSMUSG00000063200	ENSMUST00000071926	0.909365	1.01903	0.998678	0.974504
Vprbp	ENSMUSG00000040325	ENSMUST00000045973	0.967952	0.914257	1.04549	0.974424
Zfp2	ENSMUSG00000049321	uc007ita.1	1.06431	0.929808	0.932974	0.973741
Mapksp1	ENSMUSG00000091512	ENSMUST00000168345	1.03207	0.917404	0.971376	0.972491
Utp20	ENSMUSG00000004356	ENSMUST00000004470	0.985205	0.910041	1.02563	0.972432
n/a	ENSMUSG00000050621	ENSMUST00000053150	0.913961	0.918142	1.09507	0.972209
Creld2	ENSMUSG00000023272	ENSMUST00000024042	0.980893	0.963129	0.968382	0.970773
Pigq	ENSMUSG00000025728	uc008bcp.1	0.933866	0.935752	1.04406	0.969892
Golga4	ENSMUSG00000038708	ENSMUST00000172401	0.941266	1.04146	0.929157	0.969352
AK158095	ENSMUSG00000036371	uc009cfm.1	0.953833	0.975641	0.977013	0.968771
Pdzd8	ENSMUSG00000074746	ENSMUST00000099274	0.992679	0.920318	0.994626	0.96858
Cbl	ENSMUSG00000034342	ENSMUST00000037644	0.941657	0.950522	1.01479	0.968449
Fgfr1	ENSMUSG00000031565	ENSMUST00000084027	0.938484	0.930248	1.04012	0.96836
Qtrtd1	ENSMUSG00000022704	ENSMUST00000171199	0.943754	0.959466	1.00065	0.967661
Eif5a	ENSMUSG00000078812	ENSMUST00000108608	0.955128	0.974208	0.972589	0.96727
Csnk2b	ENSMUSG00000024387	uc008cfu.1	0.973218	1.01875	0.910317	0.9664
Gfm2	ENSMUSG00000021666	ENSMUST00000161639	0.951254	0.995499	0.952712	0.966273
Nucks1	ENSMUSG00000026434	uc007cnx.1	0.931746	0.925597	1.04405	0.965636
Hmg20a	ENSMUSG00000032329	ENSMUST00000034879	0.967182	0.946476	0.983229	0.965512
Abca7	ENSMUSG00000035722	ENSMUST00000171637	0.919562	1.05823	0.917914	0.963062
Chchd3	ENSMUSG00000053768	ENSMUST00000124436	1.05111	0.926043	0.916695	0.962724
Clasp2	ENSMUSG00000033392	ENSMUST00000167613	0.919412	0.959674	1.00727	0.961451
Rdh11	ENSMUSG00000066441	ENSMUST00000161204	0.92112	0.997689	0.965457	0.960907
Hadha	ENSMUSG00000025745	ENSMUST00000026843	1.02561	0.940061	0.919664	0.960701
AK180240	ENSMUSG00000032435	ENSMUST00000047404	0.957971	0.992654	0.929118	0.959563
Ttc5	ENSMUSG00000006288	ENSMUST00000006451	0.909263	0.999056	0.966481	0.957541
Hmmr	ENSMUSG00000020330	ENSMUST00000109302	0.977669	0.950871	0.937714	0.955274
AK171902	ENSMUSG00000022419	ENSMUST00000096433	0.909609	0.927938	1.031	0.954723
Snx12	ENSMUSG00000046032	ENSMUST00000077876	0.950859	0.927359	0.986709	0.954665
Scyl1	ENSMUSG00000024941	ENSMUST00000025890	0.932441	0.963865	0.965314	0.953752
Rap2b	ENSMUSG00000036894	ENSMUST00000049064	0.917598	0.999656	0.94384	0.95309
Rock2	ENSMUSG00000020580	ENSMUST00000020904	0.921436	0.983472	0.947475	0.950455
Pdcl3	ENSMUSG00000026078	ENSMUST00000027247	0.927867	0.939616	0.983959	0.950177
Phb2	ENSMUSG00000004264	ENSMUST00000004375	0.950741	0.923452	0.97516	0.949549
Oxsr1	ENSMUSG00000036737	ENSMUST00000040853	0.931449	0.918683	0.998415	0.948881
Aco2	ENSMUSG00000022477	uc007wxp.1	0.949292	0.921686	0.975419	0.948545
Rpl36a	ENSMUSG00000079435	uc009ugf.1	0.979034	0.946557	0.920022	0.948231
MRG15	ENSMUSG00000062270	uc009qzx.1	0.881347	1.07074	0.898771	0.946587
Dhcr24	ENSMUSG00000034926	ENSMUST00000047973	0.920601	0.945581	0.973006	0.946154
Ccny	ENSMUSG00000024286	ENSMUST00000053917	0.892461	1.05633	0.898388	0.946129
Tpr	ENSMUSG00000006005	ENSMUST00000119161	0.933445	0.966602	0.938466	0.946059
Pa2g4	ENSMUSG00000025364	ENSMUST00000026425	0.914562	0.920492	1.00563	0.945998
Mrpl44	ENSMUSG00000026248	ENSMUST00000027464	0.941368	0.926654	0.968445	0.945331
Ube2w	ENSMUSG00000025939	ENSMUST00000117146	0.89226	0.882134	1.07192	0.944923
Pcbp1	ENSMUSG00000051695	uc009csc.1	0.956549	0.958564	0.91987	0.944825
Tbc1d13	ENSMUSG00000039678	ENSMUST00000044556	0.897127	1.08418	0.864885	0.944
Krba1	ENSMUSG00000042810	uc009buc.1	0.912882	0.94506	0.97034	0.942467
Mfsd5	ENSMUSG00000045665	ENSMUST00000051341	0.924677	0.962019	0.937113	0.941142
Vangl1	ENSMUSG00000027860	ENSMUST00000159388	0.901985	1.04279	0.88605	0.941062
Cstf1	ENSMUSG00000027498	ENSMUST00000116375	0.904351	0.852975	1.07575	0.939711
Gtf3c3	ENSMUSG00000041303	ENSMUST00000041638	0.90514	1.03248	0.885387	0.938809
Cc2d1a	ENSMUSG00000036686	ENSMUST00000040383	1.08401	0.896578	0.851047	0.938697
Ccdc50	ENSMUSG00000038127	ENSMUST00000100026	0.92561	0.973841	0.915711	0.938048
Lyrm4	ENSMUSG00000046573	ENSMUST00000053265	0.849471	1.08556	0.894095	0.937696
Tra2b	ENSMUSG00000022858	ENSMUST00000023564	0.850452	1.09153	0.887374	0.937413
Ik	ENSMUSG00000024474	ENSMUST00000007042	0.917698	0.979151	0.915643	0.937041
Hmox2	ENSMUSG00000004070	ENSMUST00000004172	0.933313	0.918545	0.959656	0.937018
Atp8a1	ENSMUSG00000037685	uc008xqb.1	1.0702	0.865519	0.886406	0.936391
Smek1	ENSMUSG00000041846	ENSMUST00000163095	0.942973	0.917336	0.948429	0.936147
n/a	ENSMUSG00000058126	ENSMUST00000072359	0.935663	0.963265	0.910149	0.936108
Mrpl17	ENSMUSG00000030879	ENSMUST00000124482	0.936371	0.945841	0.925645	0.935916
Sav1	ENSMUSG00000021067	ENSMUST00000021467	0.892367	1.05237	0.868793	0.93442
Dcaf13	ENSMUSG00000022300	ENSMUST00000022909	0.878037	0.877649	1.05588	0.933574
hac1	ENSMUSG00000036989	ENSMUST00000106789	0.868358	1.08561	0.862781	0.93345
Flnb	ENSMUSG00000025278	uc007sek.1	1.0581	0.898573	0.854284	0.933026
Mad1	ENSMUSG00000029554	ENSMUST00000031534	1.07978	0.83447	0.898961	0.932171
Rapgef6	ENSMUSG00000037533	ENSMUST00000102743	0.871926	1.09484	0.847294	0.931726
Rfwd3	ENSMUSG00000033596	ENSMUST00000038739	0.894711	0.868616	1.03964	0.931389
Srgap2	ENSMUSG00000026425	ENSMUST00000097588	0.933638	0.912123	0.948019	0.931143
Nup98	ENSMUSG00000063550	uc009iqx.1	0.853764	0.893567	1.0477	0.92804
Ppp1ca	ENSMUSG00000040385	ENSMUST00000046094	0.942912	0.916793	0.921832	0.92711
Thoc5	ENSMUSG00000034274	ENSMUST00000038237	0.96997	0.90504	0.906278	0.926608
Oct-3/4	ENSMUSG00000024406	ENSMUST00000025271	0.904522	0.887739	0.989444	0.926187
Pdlim1	ENSMUSG00000055044	uc008hkk.1	0.854611	1.08642	0.853437	0.925364
Wwc1	ENSMUSG00000018849	ENSMUST00000018993	0.85071	0.850433	1.09431	0.925097
Dis3	ENSMUSG00000033166	ENSMUST00000042471	0.86183	0.850697	1.07894	0.924836
Ctr9	ENSMUSG00000005609	ENSMUST00000005749	1.0427	0.902661	0.838055	0.923957
Rbm15b	ENSMUSG00000045365	uc009rks.1	0.894169	0.97732	0.901428	0.923554
Cenpv	ENSMUSG00000018509	ENSMUST00000018653	0.800122	0.900293	1.09093	0.92281
Gpx7	ENSMUSG00000028597	uc008ubc.1	1.07074	0.889906	0.824543	0.922744
Prdm2	ENSMUSG00000057637	ENSMUST00000105778	0.921762	0.922564	0.921107	0.921811
Tecpr2	ENSMUSG00000021275	ENSMUST00000165978	0.923958	0.928358	0.911598	0.921277
Eea1	ENSMUSG00000036499	ENSMUST00000053484	0.857067	1.06958	0.85208	0.920949
Csk	ENSMUSG00000032312	uc009pvk.1	0.846076	1.06238	0.868967	0.920939
Ntn1	ENSMUSG00000020902	ENSMUST00000021284	1.04168	0.850658	0.877323	0.919497
Far1	ENSMUSG00000030759	uc009jhs.1	1.06798	0.822794	0.881706	0.918457
Ttc30a1	ENSMUSG00000075271	ENSMUST00000099994	1.09986	0.824537	0.854282	0.918439
Mtap	ENSMUSG00000062937	uc008tof.1	0.881199	0.885833	0.98946	0.917504
Mrpl11	ENSMUSG00000024902	ENSMUST00000025836	0.906774	0.938963	0.906833	0.917399
AK177174	ENSMUSG00000020453	ENSMUST00000057089	1.09433	0.826598	0.853271	0.917298
Tyk2	ENSMUSG00000032175	uc009oke.1	0.824903	0.878412	1.06362	0.916846
Bcr	ENSMUSG00000009681	ENSMUST00000164107	1.04416	0.831363	0.887703	0.916802
Sufu	ENSMUSG00000025231	ENSMUST00000039922	0.895339	0.852086	1.00908	0.916499
Rbm8a	ENSMUSG00000038374	uc008qnk.1	0.896722	0.828047	1.03588	0.916238
Zmiz1	ENSMUSG00000007817	ENSMUST00000162645	0.86639	1.01949	0.869242	0.915683
Tmem55a	ENSMUSG00000028221	uc008sbg.1	0.875955	1.01167	0.865995	0.915543
Pip5k1c	ENSMUSG00000034902	ENSMUST00000163075	1.04196	0.896288	0.821128	0.915313
Gsta4	ENSMUSG00000032348	uc009qty.1	0.980601	0.880377	0.886008	0.914533
Thap3	ENSMUSG00000039759	ENSMUST00000036680	0.820838	0.876691	1.05972	0.913618
Rab3gap2	ENSMUSG00000039318	uc007dyv.1	1.04458	0.883684	0.823116	0.912502
Ascc1	ENSMUSG00000044475	ENSMUST00000050516	0.979824	0.887123	0.872298	0.911869
Eef1g	ENSMUSG00000071644	ENSMUST00000052248	0.815741	0.847291	1.09678	0.911803
Pard3	ENSMUSG00000025812	ENSMUST00000160272	1.06909	0.817584	0.863687	0.910546
mKIAA1441	ENSMUSG00000019338	ENSMUST00000019482	1.09963	0.874815	0.784397	0.910401
Mlxip	ENSMUSG00000038342	ENSMUST00000068237	1.04918	0.819717	0.87715	0.910324
Agpat1	ENSMUSG00000034254	ENSMUST00000114140	0.85705	1.0336	0.850344	0.90988
N4bp3	ENSMUSG00000001053	ENSMUST00000001080	0.869433	1.04834	0.825326	0.909468
Rad50	ENSMUSG00000020380	ENSMUST00000020649	1.02284	0.831986	0.883777	0.909401
Diablo	ENSMUSG00000029433	ENSMUST00000111587	0.847213	1.00095	0.884721	0.908664
Cltc	ENSMUSG00000047126	ENSMUST00000103186	0.833883	0.863609	1.04106	0.908448
Map4k1	ENSMUSG00000037337	uc009gan.1	0.843309	0.893605	0.992838	0.907828
Tspan31	ENSMUSG00000006736	uc007hhw.1	0.821258	1.07085	0.848375	0.906983
1190002N15Rik	ENSMUSG00000045414	ENSMUST00000113028	0.779165	0.892166	1.07218	0.906666
Leo1	ENSMUSG00000042487	ENSMUST00000048937	0.938462	0.875342	0.907108	0.906604
Rnf157	ENSMUSG00000052949	uc007mkz.1	0.907368	0.799011	1.02693	0.906343
Zfp511	ENSMUSG00000025470	ENSMUST00000168194	1.01588	0.871534	0.839869	0.905969
Camsap1l1	ENSMUSG00000041570	ENSMUST00000167048	1.06998	0.799571	0.868625	0.905777
Ddx17	ENSMUSG00000055065	uc007wtq.1	0.756791	0.90073	1.0899	0.905702
Dlgap3	ENSMUSG00000042388	ENSMUST00000046659	0.798481	0.881846	1.05495	0.905655
Snrpd1	ENSMUSG00000002477	ENSMUST00000002551	0.882428	0.886754	0.949245	0.905636
Mark4	ENSMUSG00000030397	ENSMUST00000171766	0.90151	1.07417	0.766626	0.905473
Gtf2i	ENSMUSG00000060261	uc008zvk.1	0.853345	0.987367	0.880717	0.905343
Lsm6	ENSMUSG00000031683	ENSMUST00000146824	0.863671	0.826358	1.03566	0.904158
Rmnd5b	ENSMUSG00000001054	ENSMUST00000001081	0.882212	0.843328	0.992977	0.904002
Nlrp1a	ENSMUSG00000069830	ENSMUST00000168313	0.958285	0.872748	0.882588	0.903748
Mad2l1	ENSMUSG00000029910	ENSMUST00000101343	0.841118	0.824551	1.06279	0.903319
Nckap1	ENSMUSG00000027002	ENSMUST00000028386	0.906886	0.984483	0.825583	0.903318
Tcof1	ENSMUSG00000024613	ENSMUST00000078036	0.894121	0.825127	0.998425	0.903117
Wapal	ENSMUSG00000041408	ENSMUST00000111895	0.974432	0.892088	0.846221	0.902709
Ccar1	ENSMUSG00000020074	uc007fjc.1	1.05547	0.85738	0.812575	0.902597
Ppme1	ENSMUSG00000030718	ENSMUST00000032963	1.02901	0.858754	0.832077	0.902577
Apcdd1	ENSMUSG00000071847	uc008fdo.1	0.823339	1.02456	0.87144	0.902508
Nmnat1	ENSMUSG00000028992	ENSMUST00000119921	0.855463	1.03552	0.829726	0.902468
Acy3	ENSMUSG00000024866	uc008fxx.1	0.83231	0.808772	1.09182	0.902445
Hdlbp	ENSMUSG00000034088	ENSMUST00000170883	0.856073	0.869738	0.98692	0.902389
Plag1	ENSMUSG00000003282	ENSMUST00000003369	0.859681	0.869653	0.981995	0.90212
Tbrg3	ENSMUSG00000041852	ENSMUST00000048966	0.875237	0.796786	1.05267	0.902098
Tyms	ENSMUSG00000025747	ENSMUST00000026846	0.992979	0.838436	0.881088	0.901868
Wnk1	ENSMUSG00000045962	ENSMUST00000088646	0.99111	0.84018	0.879876	0.901513
Armcx4	ENSMUSG00000049804	ENSMUST00000124226	1.08406	0.886954	0.761956	0.901491
Tmem134	ENSMUSG00000024845	ENSMUST00000139718	0.955197	0.863761	0.884976	0.900477
Traf3ip2	ENSMUSG00000019842	ENSMUST00000019987	1.03521	0.882343	0.798471	0.900137
mKIAA0614	ENSMUSG00000042744	ENSMUST00000119892	0.926922	0.890534	0.883193	0.900015
Ubxn4	ENSMUSG00000026353	ENSMUST00000027592	0.84229	1.00218	0.86238	0.899571
Rab28	ENSMUSG00000029128	ENSMUST00000163431	0.822927	1.05598	0.836661	0.8992
Snai3	ENSMUSG00000006587	ENSMUST00000006762	0.861879	0.890824	0.945646	0.898785
Mrpl42	ENSMUSG00000062981	uc007gwj.1	0.828509	0.813383	1.07659	0.89856
Atp9b	ENSMUSG00000024566	ENSMUST00000091790	1.06529	0.865677	0.785768	0.8982
Cox8a	ENSMUSG00000035885	ENSMUST00000039758	0.848839	0.962294	0.887049	0.898174
Psmd1	ENSMUSG00000026229	uc007buy.1	0.823159	0.801558	1.09803	0.89814
0610012G03Rik	ENSMUSG00000047112	uc007yxy.1	0.832588	0.864642	1.00578	0.89796
Rab6	ENSMUSG00000030704	ENSMUST00000032946	0.955784	0.899786	0.840922	0.897604
Zscan22	ENSMUSG00000054715	ENSMUST00000055528	0.952877	0.87773	0.863768	0.897288
Nipbl	ENSMUSG00000022141	uc007vep.1	0.866188	0.857895	0.971806	0.897171
Idh3g	ENSMUSG00000002010	ENSMUST00000052761	0.872074	0.906638	0.912405	0.896861
Bnc2	ENSMUSG00000028487	ENSMUST00000167890	0.884609	0.774345	1.05206	0.896552
Mut	ENSMUSG00000023921	ENSMUST00000169611	0.845655	0.861871	0.987243	0.896093
Hcfc1	ENSMUSG00000031386	ENSMUST00000114372	0.848442	0.862129	0.982606	0.895759
Atp5a1	ENSMUSG00000025428	ENSMUST00000114748	0.827471	1.00578	0.861722	0.895105
Uchl5	ENSMUSG00000018189	ENSMUST00000018333	0.824125	0.869356	1.00095	0.895093
Tpm3	ENSMUSG00000027940	ENSMUST00000029549	0.925766	0.886777	0.87267	0.894792
Anapc5	ENSMUSG00000029472	uc008zmf.1	0.824714	0.853465	1.0175	0.894695
Ascc2	ENSMUSG00000020412	ENSMUST00000070257	1.07374	0.796114	0.836827	0.89434
Tmem181a	ENSMUSG00000079733	ENSMUST00000167717	1.01137	0.818949	0.862346	0.893888
Ap3b1	ENSMUSG00000021686	ENSMUST00000167953	0.85539	1.04667	0.797485	0.893784
Galnt7	ENSMUSG00000031608	ENSMUST00000034021	0.818632	0.821229	1.06127	0.893565
Nfya	ENSMUSG00000023994	ENSMUST00000046719	0.751252	1.04572	0.907651	0.893387
Eif3d	ENSMUSG00000016554	ENSMUST00000100484	0.956103	0.852187	0.873924	0.892972
Fam149b1	ENSMUSG00000039599	uc007sji.1	0.881991	0.777446	1.03842	0.892968
AK158095	ENSMUSG00000036371	uc009cfl.1	0.892449	0.873402	0.913085	0.892832
Mrps16	ENSMUSG00000049960	ENSMUST00000061444	0.905158	0.835296	0.941173	0.892781
Adar	ENSMUSG00000027951	ENSMUST00000029563	0.883756	0.937617	0.858561	0.892708
Zfp358	ENSMUSG00000047264	ENSMUST00000061508	1.01329	0.848238	0.827585	0.892663
Wdr83	ENSMUSG00000005150	ENSMUST00000093357	0.895356	0.832655	0.954104	0.892659
Nedd8	ENSMUSG00000010376	ENSMUST00000010520	0.894749	0.951369	0.835582	0.892647
Ubfd1	ENSMUSG00000030870	uc009jog.1	0.764382	1.02694	0.905893	0.892574
n/a	ENSMUSG00000058443	ENSMUST00000076364	0.899866	0.823569	0.959452	0.892552
Rnf10	ENSMUSG00000041740	ENSMUST00000112096	0.999741	0.876332	0.81026	0.892059
Sptlc2	ENSMUSG00000021036	ENSMUST00000021424	0.774906	1.03957	0.88085	0.891939
Nudc	ENSMUSG00000028851	ENSMUST00000030665	0.824008	0.903662	0.952834	0.891904
Mphosph10	ENSMUSG00000030521	ENSMUST00000032735	1.01229	0.881333	0.795183	0.891875
Zc3h13	ENSMUSG00000022000	uc007uqt.1	1.09776	0.851796	0.75843	0.891769
Psmc3	ENSMUSG00000002102	ENSMUST00000067663	1.07716	0.894401	0.735768	0.891628
Sin3a	ENSMUSG00000042557	uc009ptx.1	0.898145	0.864571	0.91225	0.891429
Tnpo1	ENSMUSG00000009470	uc007rpd.1	0.902808	0.820356	0.955941	0.891271
n/a	ENSMUSG00000048648	ENSMUST00000085097	0.742361	0.882135	1.07916	0.890727
Kpna6	ENSMUSG00000003731	ENSMUST00000003828	1.02621	0.814458	0.844732	0.890446
AK158095	ENSMUSG00000036371	uc009cfk.1	0.745098	0.908026	1.04337	0.890395
Srpk1	ENSMUSG00000004865	ENSMUST00000126683	0.793448	0.903773	0.984286	0.890362
Larp1	ENSMUSG00000037331	ENSMUST00000071487	0.886176	0.904232	0.880672	0.890303
Sdad1	ENSMUSG00000029415	ENSMUST00000031364	0.906711	0.859512	0.905349	0.890251
Nol11	ENSMUSG00000018433	ENSMUST00000106757	1.05622	0.866729	0.770182	0.890041
Ncl	ENSMUSG00000026234	ENSMUST00000027438	0.886969	0.844581	0.940813	0.88992
Ube2h	ENSMUSG00000039159	ENSMUST00000102993	0.887661	1.09794	0.722697	0.889735
Mek5	ENSMUSG00000058444	ENSMUST00000034920	0.796979	0.88425	0.995668	0.888612
Incenp	ENSMUSG00000024660	ENSMUST00000025562	0.747144	0.908484	1.03374	0.888608
Sec31a	ENSMUSG00000035325	uc008yhh.1	0.813378	0.877491	0.981344	0.88808
Pitpna	ENSMUSG00000017781	ENSMUST00000102509	0.877749	0.983316	0.81124	0.887982
Ecd	ENSMUSG00000021810	uc007sjg.1	0.877558	0.844295	0.944291	0.887753
Yif1a	ENSMUSG00000024875	ENSMUST00000025811	0.800193	1.00554	0.868689	0.887468
Dtwd1	ENSMUSG00000023330	ENSMUST00000170908	0.796343	0.875957	1.0016	0.887345
Zfp143	ENSMUSG00000061079	ENSMUST00000084727	0.85106	1.07225	0.764572	0.886934
Man1a2	ENSMUSG00000008763	ENSMUST00000008907	0.877489	0.822628	0.96593	0.886741
Fbxo3	ENSMUSG00000027180	uc008lji.1	0.80917	0.969766	0.887997	0.886556
Tnfrsf22	ENSMUSG00000010751	ENSMUST00000075588	1.01151	0.780169	0.881608	0.886092
Flame-3	ENSMUSG00000054499	ENSMUST00000058702	0.881394	0.995027	0.792836	0.885923
[truncated: 1,909 more rows]
