# Supplementary material for: Global analyses of UPF1 binding and function reveal expanded scope of nonsense-mediated mRNA decay
Source: HighWire-hosted journal article supplement (doi:10.1101/gr.157354.113), 2013-06-13
Supplement: SuppTable_S5_v6.xlsx [file SuppTable_S5_v6.xlsx]

## Sheet: 3'UTR bound genes
High confidence Upf1 target genes, 3'UTR binding
				pval calls for CLIP libraries					Unique barcoded CLIP reads					mRNA-Seq reads		lambda calculations for pval calling
Gene name	Gene	Transcript	3'UTR length	pval Upf1.A1	pval Upf1.I	pval Upf1.A2	pval Upf1.CHX.A1	pval Upf1.CHX.A1	Upf1.A1	Upf1.I	Upf1.A2	Upf1.CHX.A1	Upf1.CHX.A2	v6.5 NoCHX	v6.5 CHX	lambda Upf1.A1	lambda Upf1.I	lambda Upf1.A2	lambda Upf1.CHX.A1	lambda Upf1.CHX.A2
Gnai3	ENSMUSG00000000001	ENSMUST00000000001	2056	0.0188419	3.45571e-05	0.862127	0.703964	0.39757	31	25	1	1	2	3612	2916	20.5598	9.80638	1.98142	1.21728	1.36943
Sdhd	ENSMUSG00000000171	ENSMUST00000000175	747	6.87002e-05	0.0311726	0.726448	1	1	30	12	1	0	0	2363	2051	13.4504	6.41541	1.29626	0.856184	0.963207
AK041755	ENSMUSG00000000303	ENSMUST00000000312	1631	0	0.0155172	0.852065	0.0275751	0.627117	123	35	3	7	3	8648	6886	49.225	23.4788	4.74401	2.87454	3.23386
Rdx	ENSMUSG00000032050	ENSMUST00000000590	2258	0.040582	1.56843e-07	0.000621007	0.855194	0.639024	39	37	10	1	2	5063	4629	28.8189	13.7458	2.7774	1.93236	2.17391
Hk2	ENSMUSG00000000628	ENSMUST00000000642	2285	0.0130731	2.18355e-05	0.383591	0.377672	0.679178	69	48	6	4	3	9110	7453	51.8548	24.7331	4.99745	3.11123	3.50014
Polr3d	ENSMUSG00000000776	ENSMUST00000000793	708	1.28303e-06	0.00654336	0.00104175	1	0.361711	18	7	4	0	1	790	956	4.49673	2.14481	0.433368	0.399079	0.448964
Sf3a1	ENSMUSG00000002129	ENSMUST00000002198	2406	3.93251e-10	0.00644346	0.372436	0.0859506	0.686213	42	14	2	3	1	2366	2468	13.4674	6.42356	1.29791	1.03026	1.15904
Ykt6	ENSMUSG00000002741	ENSMUST00000002818	1736	0	4.30109e-10	1.32009e-06	0.0450713	0.773383	70	35	12	4	1	3634	3161	20.685	9.86611	1.99349	1.31955	1.48449
Wbscr9	ENSMUSG00000002748	ENSMUST00000002825	1666	5.33121e-10	6.8163e-05	0.0225308	0.822476	0.856974	47	21	5	1	1	2878	4141	16.3818	7.81361	1.57878	1.72865	1.94473
Ppp5c	ENSMUSG00000003099	ENSMUST00000003183	469	0.000377799	0.0267179	0.0110102	1	1	14	6	3	0	0	824	881	4.69027	2.23711	0.452019	0.367771	0.413742
Kpna1	ENSMUSG00000022905	ENSMUST00000004054	2254	2.21128e-07	0.000279792	0.101653	0.0650533	0.501208	44	21	4	4	2	3200	3582	18.2146	8.68782	1.75542	1.4953	1.68221
Mrpl49	ENSMUSG00000007338	ENSMUST00000007482	1206	2.35045e-12	0.0236852	0.0508459	0.191746	0.228134	36	9	3	2	2	1501	1920	8.5438	4.07513	0.823399	0.801498	0.901686
Ube2g2	ENSMUSG00000009293	ENSMUST00000009437	1019	1.70246e-05	3.85784e-07	0.347754	0.398824	0.112924	16	13	1	1	2	779	1219	4.43412	2.11494	0.427334	0.508868	0.572476
Rassf1	ENSMUSG00000010067	ENSMUST00000010211	718	0.00019915	2.63357e-05	1.63507e-10	1	0.392993	10	8	8	0	1	421	1063	2.39636	1.14299	0.230947	0.443746	0.499214
Igf2bp1	ENSMUSG00000013415	ENSMUST00000013559	6337	1.30118e-13	0	2.10942e-15	0	0	808	271	114	65	78	35812	28056	203.844	97.2276	19.6453	11.7119	13.1759
Rnf168	ENSMUSG00000014074	ENSMUST00000014218	1580	0.000402735	0.0435194	0.093135	0.121996	0.0312085	15	6	2	2	3	929	1438	5.28793	2.52218	0.509619	0.600289	0.675325
Dnajc7	ENSMUSG00000014195	ENSMUST00000014339	281	0.000526138	0.00528389	4.09268e-06	0.00364383	0.00549684	21	11	8	4	4	1604	1471	9.13008	4.35477	0.879902	0.614065	0.690823
Csf1	ENSMUSG00000014599	ENSMUST00000014743	2111	0.00115727	2.7327e-06	0.605181	0.419981	0.743197	37	28	2	3	2	3722	5655	21.1859	10.105	2.04177	2.36066	2.65575
SASH1	ENSMUSG00000015305	ENSMUST00000015449	3278	0.00455996	0.000159227	0.375417	0.0540849	1	12	10	1	2	0	858	890	4.8838	2.32942	0.470671	0.371528	0.417969
Kctd5	ENSMUSG00000016946	ENSMUST00000017090	1681	0	0.00230285	0.0020521	0.651041	5.46634e-08	53	15	6	1	11	2330	2522	13.2625	6.32582	1.27816	1.0528	1.1844
Sdc4	ENSMUSG00000017009	ENSMUST00000017153	1839	7.77156e-16	5.77676e-07	0.212176	0.0243574	0.151971	53	18	2	3	2	1564	1467	8.9024	4.24617	0.857959	0.612395	0.688944
Ywhab	ENSMUSG00000018326	ENSMUST00000018470	1863	1.36198e-08	4.12826e-09	0.0216414	0.501763	0.294789	63	40	7	2	3	4975	4034	28.318	13.5069	2.72912	1.68398	1.89448
Akap1	ENSMUSG00000018428	ENSMUST00000018572	963	4.77856e-05	0.0380808	0.129773	1	1	19	7	2	0	0	1137	1038	6.47188	3.08689	0.623721	0.43331	0.487474
Gm16515	ENSMUSG00000018931	ENSMUST00000019075	3759	0.000393074	0.0252649	0.305142	1	0.726038	25	11	2	0	1	2026	2757	11.5321	5.50048	1.1114	1.1509	1.29476
Mlh3	ENSMUSG00000021245	ENSMUST00000019378	1093	0.0194898	8.71669e-12	0.0279314	0.155194	0.172817	7	15	2	1	1	469	404	2.66958	1.27331	0.257278	0.168649	0.18973
Calm3	ENSMUSG00000019370	ENSMUST00000019514	1569	4.88498e-15	1.09143e-09	3.38444e-09	0.60351	0.0825751	186	50	20	2	5	6816	4876	38.7971	18.5051	3.73903	2.03547	2.28991
Sar1a	ENSMUSG00000020088	ENSMUST00000020285	1894	4.96191e-05	0.00517452	0.407579	1	0.62119	32	15	2	0	1	2549	2067	14.5091	6.92039	1.3983	0.862863	0.970721
Ddit4	ENSMUSG00000020108	ENSMUST00000020308	861	2.84217e-14	2.10723e-05	0.00117256	1	1	29	11	4	0	0	816	434	4.64473	2.21539	0.447631	0.181172	0.203819
D10Wsu102e	ENSMUSG00000020255	ENSMUST00000020488	2913	9.2774e-11	6.03235e-06	0.000735655	1	0.508082	46	22	7	0	2	2627	3629	14.9531	7.13216	1.44109	1.51492	1.70428
Wdr82	ENSMUSG00000020257	ENSMUST00000020490	3081	0.00299832	4.82214e-05	0.268432	0.000287302	0.00855018	54	36	5	10	8	6321	6016	35.9796	17.1612	3.46749	2.51136	2.82528
Hspa4	ENSMUSG00000020361	ENSMUST00000020630	1798	8.05877e-06	7.66926e-05	1.65453e-07	0.031895	0.000451944	43	24	13	4	7	3573	2822	20.3378	9.7005	1.96003	1.17804	1.32529
Gatsl3	ENSMUSG00000020424	ENSMUST00000020699	489	1.41173e-08	0.00222806	0.298388	1	1	19	7	1	0	0	646	457	3.67708	1.75385	0.354374	0.190773	0.21462
Fam33a	ENSMUSG00000020492	ENSMUST00000020794	2636	2.87085e-06	6.43689e-09	0.506659	0.592757	0.268155	23	19	1	1	2	1288	2152	7.33139	3.49685	0.706555	0.898346	1.01064
Grb2	ENSMUSG00000059923	ENSMUST00000021090	1724	3.21178e-08	5.06784e-07	0.028232	0.545879	0.0609063	35	21	4	1	3	2065	1891	11.7541	5.60636	1.13279	0.789392	0.888066
Blmh	ENSMUSG00000020840	ENSMUST00000021197	752	0	0.0254871	0.155986	0.0921399	1.44218e-12	39	8	2	2	12	1277	1213	7.26877	3.46698	0.70052	0.506363	0.569659
Pfas	ENSMUSG00000020899	ENSMUST00000021282	2266	9.9461e-10	1.5104e-05	0.0644276	1	0.813687	56	27	5	0	1	3870	3578	22.0283	10.5068	2.12296	1.49363	1.68033
Lsm12	ENSMUSG00000020922	ENSMUST00000021297	1578	9.17302e-07	1.76643e-10	8.19556e-05	0.00396605	0.682358	42	33	9	5	1	3155	2442	17.9585	8.56565	1.73073	1.01941	1.14683
Snw1	ENSMUSG00000021039	ENSMUST00000021428	582	6.60103e-05	0.00314166	2.42205e-09	6.86695e-05	0.0786672	16	8	9	5	2	875	982	4.98056	2.37558	0.479996	0.409933	0.461175
Esrrb	ENSMUSG00000021255	ENSMUST00000021680	2555	0	1.51453e-08	0.0334572	0.00372286	0.997649	199	74	13	13	1	13173	12889	74.9816	35.764	7.22628	5.38047	6.05303
Eaf1	ENSMUSG00000021890	ENSMUST00000022446	3241	0.000253315	1.29756e-10	0.0367936	0.543846	1	36	34	5	2	0	3291	4366	18.7326	8.93488	1.80533	1.82257	2.0504
Ccdc25	ENSMUSG00000022035	ENSMUST00000022614	1445	8.1422e-05	0.00104026	0.00989454	0.49949	0.183552	22	12	4	1	2	1496	1658	8.51534	4.06156	0.820657	0.692127	0.778643
Xpo7	ENSMUSG00000022100	ENSMUST00000022696	11755	0	5.97247e-06	0.810583	0.00145738	0.00260834	62	24	1	6	6	3033	2858	17.264	8.23443	1.6638	1.19306	1.3422
Dnajc3	ENSMUSG00000022136	ENSMUST00000022734	3518	0.00371456	0.00033903	1.73213e-05	1	1	13	10	6	0	0	945	903	5.37901	2.56562	0.518396	0.376955	0.424074
Parvb	ENSMUSG00000022438	ENSMUST00000023072	2657	2.55351e-15	0.00106001	0.0912314	0.0857925	0.32218	65	19	4	3	2	3075	2466	17.5031	8.34846	1.68684	1.02942	1.1581
Slc38a2	ENSMUSG00000022462	ENSMUST00000023099	2733	0.00177591	1.51862e-06	0.114108	0.0628918	0.215269	82	56	9	5	4	10204	5049	58.0819	27.7033	5.59758	2.10769	2.37115
Rrn3	ENSMUSG00000022682	ENSMUST00000023363	1568	0	5.42932e-05	0.0456611	0.8551	0.896331	104	39	8	2	2	7118	8186	40.5161	19.325	3.9047	3.41722	3.84437
Fyttd1	ENSMUSG00000022800	ENSMUST00000023489	3245	0.00599165	3.24357e-05	0.611817	1	0.506543	19	16	1	0	1	1725	1504	9.81882	4.68328	0.946279	0.62784	0.70632
Gsk3b	ENSMUSG00000022812	ENSMUST00000023507	5515	2.29799e-05	2.1353e-07	0.624386	0.0247409	1	26	20	1	3	0	1785	1476	10.1603	4.84618	0.979193	0.616152	0.693171
Smarcd1	ENSMUSG00000023018	ENSMUST00000023759	1570	1.22124e-15	0.00271193	4.32077e-05	0.807822	1	81	23	11	1	0	4377	3951	24.9142	11.8833	2.40108	1.64933	1.8555
Mllt1	ENSMUSG00000024212	ENSMUST00000025053	1850	0.000390587	0.0240447	0.43103	1	0.017252	16	7	1	0	3	1028	1141	5.85145	2.79096	0.563927	0.476307	0.535845
Stard4	ENSMUSG00000024378	ENSMUST00000025236	4231	0.00243649	1.18422e-06	0.424437	1	0.312871	14	14	1	0	1	1007	799	5.73191	2.73395	0.552407	0.33354	0.375233
Ddb1	ENSMUSG00000024740	ENSMUST00000025649	651	0	1.89618e-06	0.00037702	0.590136	0.653646	107	41	12	2	2	6576	4757	37.431	17.8535	3.60738	1.9858	2.23402
Aldh18a1	ENSMUSG00000025007	ENSMUST00000025979	891	2.37603e-10	0.025655	0.566329	1	1	33	9	1	0	0	1523	1154	8.66902	4.13486	0.835468	0.481734	0.541951
Pcgf6	ENSMUSG00000025050	ENSMUST00000026032	1010	7.48001e-05	0.0224892	0.0497094	0.448591	0.488132	22	9	3	1	1	1487	1426	8.46411	4.03712	0.81572	0.595279	0.669689
Scd2	ENSMUSG00000025203	ENSMUST00000026221	3664	6.56253e-13	1.83167e-10	0.00345043	0.0131133	0.0111708	155	85	17	10	11	14472	10327	82.3756	39.2907	7.93887	4.31098	4.84985
Tsr2	ENSMUSG00000025264	ENSMUST00000026295	3185	1.83203e-07	0.000138411	0.0790361	1	0.407637	20	10	2	0	1	843	1115	4.79841	2.2887	0.462442	0.465453	0.523635
Gnl3l	ENSMUSG00000025266	ENSMUST00000026297	2963	1.37578e-05	0.00257458	0.747642	0.209566	0.00050217	53	25	2	3	8	4885	3767	27.8058	13.2625	2.67975	1.57252	1.76909
Pa2g4	ENSMUSG00000025364	ENSMUST00000026425	1140	0.000171319	0.00256452	0.0151515	0.79583	0.533405	47	24	7	1	2	4619	3806	26.2917	12.5403	2.53383	1.5888	1.7874
Ttc4	ENSMUSG00000025413	ENSMUST00000026480	879	4.54434e-05	0.0156894	0.40289	0.00835368	1	17	7	1	3	0	940	977	5.35055	2.55205	0.515653	0.407846	0.458826
Crcp	ENSMUSG00000025532	ENSMUST00000026608	935	9.48292e-05	0.0301069	3.06103e-05	0.0452743	0.314804	13	5	5	2	1	629	805	3.58031	1.7077	0.345049	0.336045	0.37805
Gm10012	ENSMUSG00000025730	ENSMUST00000026826	1514	1.05052e-08	0.000149207	0.0119975	1	1	22	10	3	0	0	851	1073	4.84395	2.31042	0.466831	0.447921	0.503911
Hgs	ENSMUSG00000025793	ENSMUST00000026900	485	2.68097e-05	0.0420645	0.0285893	1	1	12	4	2	0	0	475	471	2.70373	1.2896	0.260569	0.196618	0.221195
Rassf3	ENSMUSG00000025795	ENSMUST00000026902	2586	3.70444e-06	4.13819e-06	0.0785011	4.32181e-06	0.505383	28	18	3	7	1	1805	1499	10.2742	4.90048	0.990164	0.625753	0.703972
Atic	ENSMUSG00000026192	ENSMUST00000027384	960	2.40363e-13	4.20352e-08	0.0121753	0.000230031	0.241564	49	25	5	6	2	2451	1998	13.9513	6.65433	1.34454	0.834059	0.938317
Itm2c	ENSMUSG00000026223	ENSMUST00000027425	1037	1.51581e-05	0.000698752	0.313615	1	1	15	8	1	0	0	686	757	3.90476	1.86245	0.376317	0.316007	0.355508
nek2	ENSMUSG00000026622	ENSMUST00000027931	1693	0.0017045	0.015099	0.000747029	1	0.697215	28	14	7	0	1	2634	2544	14.9929	7.15116	1.44493	1.06199	1.19473
Gtf3c5	ENSMUSG00000026816	ENSMUST00000028157	832	3.27838e-06	0.0191761	0.00892699	1	0.393563	17	6	3	0	1	762	1065	4.33736	2.06879	0.418008	0.444581	0.500154
Gpd2	ENSMUSG00000026827	ENSMUST00000028167	3242	0.00507572	0.000663534	0.597271	1	1	34	22	2	0	0	3668	3116	20.8785	9.95842	2.01214	1.30076	1.46336
Lin7c	ENSMUSG00000027162	ENSMUST00000028583	3602	1.49018e-05	0.000432625	0.111342	0.791959	0.829031	40	21	4	1	1	3311	3761	18.8464	8.98918	1.81631	1.57002	1.76627
Wdr76	ENSMUSG00000027242	ENSMUST00000028676	842	4.72376e-08	9.20108e-11	1.72215e-05	1	0.341308	17	15	5	0	1	557	889	3.17048	1.51222	0.305552	0.37111	0.417499
Slc23a2	ENSMUSG00000027340	ENSMUST00000028815	4173	0.00168564	0.000386593	0.205203	0.611197	0.287317	19	13	2	1	2	1529	2263	8.70317	4.15115	0.838759	0.944683	1.06277
Aurka	ENSMUSG00000027496	ENSMUST00000028997	600	0.000193982	0.0293716	1.09097e-06	1	1	24	10	9	0	0	1816	1509	10.3368	4.93034	0.996198	0.629928	0.708668
Src	ENSMUSG00000027646	ENSMUST00000029175	1901	6.92872e-11	0.000637518	0.222376	0.165897	1	35	13	2	2	0	1615	1746	9.19269	4.38464	0.885936	0.728862	0.81997
Dapp1	ENSMUSG00000028159	ENSMUST00000029806	2114	1.14921e-07	0.0151655	0.249825	0.243034	1	16	5	1	1	0	524	667	2.98264	1.42263	0.287449	0.278437	0.313242
B4galt1	ENSMUSG00000028413	ENSMUST00000030121	2583	1.23179e-12	8.19019e-10	0.0110236	2.21424e-05	0.0240719	37	22	4	6	3	1545	1298	8.79425	4.19459	0.847536	0.541846	0.609577
Nol6	ENSMUSG00000028430	ENSMUST00000030138	930	2.08894e-09	0.0373114	0.436948	1	1	44	13	2	0	0	2706	2398	15.4027	7.34664	1.48442	1.00104	1.12617
Ppcs	ENSMUSG00000028636	ENSMUST00000030385	440	2.65658e-10	0.0142095	0.000917264	0.0188351	1	16	4	3	2	0	337	498	1.91823	0.914936	0.184867	0.207889	0.233875
Znf593	ENSMUSG00000028840	ENSMUST00000030644	1500	5.84563e-06	0.0143552	0.00745901	0.430342	0.469035	16	6	3	1	1	713	1348	4.05845	1.93576	0.391128	0.562719	0.633058
AK155592	ENSMUSG00000028893	ENSMUST00000030724	1684	3.47161e-10	0.000194522	0.278167	0.0154875	0.0910136	52	22	3	4	3	3341	2250	19.0172	9.07063	1.83276	0.939256	1.05666
Ung	ENSMUSG00000029591	ENSMUST00000031587	947	0	0.00107177	0.285433	0.556002	0.232434	56	14	2	1	2	1928	1945	10.9743	5.23441	1.05764	0.811934	0.913426
Adipor2	ENSMUSG00000030168	ENSMUST00000032272	2650	3.06594e-05	0.0048815	0.578658	0.217308	1	41	19	2	3	0	3544	3839	20.1727	9.62176	1.94412	1.60258	1.8029
Etnk1	ENSMUSG00000030275	ENSMUST00000032413	5086	4.55589e-08	2.17448e-12	0.976062	0.723747	0.923539	104	72	2	3	2	10250	8995	58.3437	27.8282	5.62281	3.75494	4.2243
mFLJ00061	ENSMUSG00000030327	ENSMUST00000032477	1546	0.00595692	1.24473e-07	0.0158395	1	1	19	20	4	0	0	1724	2331	9.81313	4.68056	0.94573	0.973069	1.0947
mKIAA1745	ENSMUSG00000030539	ENSMUST00000032754	1059	7.77156e-15	0.0154638	0.000513768	0.365563	0.0938324	35	8	5	1	2	1160	1090	6.6028	3.14934	0.636338	0.455017	0.511894
Arl6ip1	ENSMUSG00000030654	ENSMUST00000032888	1401	0.00524474	4.86836e-06	0.0263757	1	1	53	39	8	0	0	6363	5201	36.2186	17.2752	3.49053	2.17114	2.44253
Ubfd1	ENSMUSG00000030870	ENSMUST00000033158	3634	4.68537e-05	0.000400076	0.549901	1	1	54	29	3	0	0	5254	3226	29.9061	14.2643	2.88217	1.34668	1.51502
Swap70	ENSMUSG00000031015	ENSMUST00000033325	2166	2.68898e-06	0.00171196	0.00749073	0.137056	0.164907	24	11	4	2	2	1378	1546	7.84367	3.74119	0.755926	0.645373	0.726045
Ciapin1	ENSMUSG00000031781	ENSMUST00000034233	536	1.19676e-05	0.0410296	0.0910963	1	0.554354	28	10	3	0	1	1927	1721	10.9686	5.2317	1.05709	0.718426	0.80823
2310022B05Rik	ENSMUSG00000031983	ENSMUST00000034464	2142	7.84172e-05	0.000307935	0.558891	1	1	22	13	1	0	0	1492	1050	8.49257	4.0507	0.818462	0.438319	0.493109
Ldlr	ENSMUSG00000032193	ENSMUST00000034713	1740	6.47101e-05	0.0026014	0.325342	1	1	28	14	2	0	0	2127	1974	12.107	5.77469	1.1668	0.82404	0.927045
Fam195b	ENSMUSG00000061111	ENSMUST00000034913	796	4.58128e-06	0.00158982	0.00957118	1	1	17	8	3	0	0	782	828	4.4512	2.12309	0.42898	0.345646	0.388852
Fbxo21	ENSMUSG00000032898	ENSMUST00000035579	1994	2.07444e-07	0.0030703	0.0057371	1	1	25	10	4	0	0	1275	982	7.25739	3.46155	0.699423	0.409933	0.461175
Pex5	ENSMUSG00000005069	ENSMUST00000035861	1137	1.65977e-06	4.38132e-06	0.100952	0.303667	0.00831621	20	13	2	1	3	975	867	5.54977	2.64707	0.534853	0.361927	0.407167
Eif4h	ENSMUSG00000040731	ENSMUST00000036125	1629	2.07612e-14	4.06213e-11	0.207534	0.978669	0.806201	222	69	8	1	3	10273	9217	58.4746	27.8906	5.63543	3.84761	4.32856
Clic4	ENSMUSG00000037242	ENSMUST00000037099	3132	8.85189e-09	0.0239125	0.0233535	0.927463	0.341928	94	34	10	1	4	8641	6285	49.1852	23.4598	4.74017	2.62365	2.95161
A230046K03Rik	ENSMUSG00000034560	ENSMUST00000038388	2231	0.000422256	9.80181e-07	0.464935	0.412224	0.45	17	15	1	1	1	1140	1273	6.48896	3.09504	0.625367	0.53141	0.597836
Exosc2	ENSMUSG00000039356	ENSMUST00000038474	780	0.000124953	0.03502	0.00409847	1	1	25	10	5	0	0	1873	2267	10.6612	5.08509	1.02747	0.946352	1.06465
Thbs1	ENSMUSG00000040152	ENSMUST00000039559	2104	6.86856e-08	0	0.653131	0.00550897	0.546749	87	71	4	11	5	8154	10493	46.4131	22.1377	4.47302	4.38027	4.92781
mKIAA0376	ENSMUSG00000033444	ENSMUST00000040105	2520	5.08704e-13	0.00641318	0.00831634	0.0404148	1	36	10	4	3	0	1421	1795	8.08843	3.85794	0.779514	0.749317	0.842982
Ccdc21	ENSMUSG00000037443	ENSMUST00000040271	1421	6.28645e-06	0.034013	0.0394774	1	1	23	8	3	0	0	1353	1383	7.70137	3.67332	0.742211	0.577329	0.649495
Ankrd54	ENSMUSG00000033055	ENSMUST00000040676	916	8.80164e-06	1.22272e-05	0.238632	1	1	13	9	1	0	0	497	754	2.82896	1.34933	0.272638	0.314755	0.354099
Scd1	ENSMUSG00000037071	ENSMUST00000041331	3468	1.12716e-09	4.94459e-09	0.141398	7.96037e-09	0.054088	41	26	3	10	3	2358	1799	13.4219	6.40184	1.29352	0.750987	0.844861
Serpine1	ENSMUSG00000037411	ENSMUST00000041388	1670	1.11022e-14	6.32827e-15	0.238165	6.13837e-08	0	187	88	7	21	36	9119	11775	51.906	24.7576	5.00238	4.91544	5.52987
Aagab	ENSMUSG00000037257	ENSMUST00000041551	1605	1.02238e-11	0.0329144	0.521584	1	1	33	8	1	0	0	1344	1640	7.65014	3.64889	0.737274	0.684613	0.77019
Pdxk	ENSMUSG00000032788	ENSMUST00000041616	4057	0.000771528	0.00206341	0.142376	1	1	17	10	2	0	0	1205	898	6.85894	3.27151	0.661024	0.374867	0.421726
Usp22	ENSMUSG00000042506	ENSMUST00000041683	2686	6.39933e-13	6.724e-10	0.92224	1	1	71	40	1	0	0	4656	5317	26.5023	12.6408	2.55413	2.21957	2.49701
Asb6	ENSMUSG00000039483	ENSMUST00000041726	743	2.40403e-07	0.0112157	0.233603	1	0.0659175	15	5	1	0	2	485	886	2.76065	1.31675	0.266055	0.369858	0.41609
Lmtk2	ENSMUSG00000038970	ENSMUST00000041804	3460	6.44285e-05	0.044197	0.500084	0.608101	1	36	14	2	1	0	3060	2244	17.4177	8.30773	1.67862	0.936751	1.05384
Gadd45a	ENSMUSG00000036390	ENSMUST00000043098	563	1.34337e-14	3.76301e-11	3.97904e-13	1	0.880855	44	26	15	0	1	1860	4530	10.5872	5.0498	1.02034	1.89103	2.12741
Pvr	ENSMUSG00000040511	ENSMUST00000043517	1549	0.00209772	3.69502e-06	0.309461	0.000326341	0.000506617	11	11	1	4	4	675	759	3.84215	1.83259	0.370283	0.316842	0.356448
Smg7	ENSMUSG00000042772	ENSMUST00000043560	2276	0	9.28376e-06	0.154552	0.718581	1	71	27	4	2	0	3762	6058	21.4136	10.2136	2.06371	2.52889	2.84501
F11r	ENSMUSG00000038235	ENSMUST00000043839	1509	1.57243e-08	7.30775e-06	0.379855	0.329343	1	22	12	1	1	0	871	957	4.95779	2.36472	0.477802	0.399497	0.449434
Lasp1	ENSMUSG00000038366	ENSMUST00000043843	2519	2.05391e-14	0.0194954	0.313988	0.195576	0.998037	167	55	10	8	1	15027	13273	85.5347	40.7975	8.24332	5.54077	6.23337
Tbc1d1	ENSMUSG00000029174	ENSMUST00000043893	1550	0.000468661	0.0159343	0.0954948	0.348928	1	15	7	2	1	0	943	1028	5.36762	2.56019	0.517299	0.429136	0.482777
Actr1b	ENSMUSG00000037351	ENSMUST00000043951	874	0.000991959	0.00480185	0.308952	0.15452	0.00845559	24	13	2	2	4	2045	1668	11.6403	5.55206	1.12182	0.696302	0.783339
AK158379	ENSMUSG00000039067	ENSMUST00000044106	503	0	4.25155e-05	2.35478e-13	0.0400831	0.000239086	78	18	16	3	6	2159	1789	12.2892	5.86157	1.18436	0.746813	0.840164
Eif2c2	ENSMUSG00000036698	ENSMUST00000044113	5283	7.9078e-11	0.0312216	0.000706788	0.00247649	0.0169791	79	25	11	7	6	6093	4283	34.6818	16.5422	3.34242	1.78793	2.01142
Tbc1d13	ENSMUSG00000039678	ENSMUST00000044556	2248	6.38408e-05	4.30401e-06	0.0324887	0.343457	0.397406	37	25	5	2	2	3179	2915	18.0951	8.63081	1.7439	1.21686	1.36897
Wdr18	ENSMUSG00000035754	ENSMUST00000045247	1647	1.9994e-05	0.0133652	0.171378	1	1	22	9	2	0	0	1357	1771	7.72414	3.68418	0.744406	0.739299	0.831711
Smg6	ENSMUSG00000038290	ENSMUST00000045281	1498	4.996e-15	6.06686e-05	1.57987e-08	0.354611	0.388989	29	10	8	1	1	761	1049	4.33166	2.06607	0.41746	0.437902	0.49264
4F2 lc	ENSMUSG00000040010	ENSMUST00000045557	1888	1.65423e-14	4.91274e-13	3.26956e-05	0.819562	0.468152	226	79	19	2	4	11460	7500	65.2311	31.1133	6.28658	3.13085	3.52221
Ddx21	ENSMUSG00000020075	ENSMUST00000045866	2102	8.80431e-06	0.00117468	0.0045664	0.460275	0.35581	93	45	13	4	5	10058	8350	57.2508	27.3069	5.51749	3.48568	3.92139
Slc16a1	ENSMUSG00000032902	ENSMUST00000046212	2740	5.6136e-11	0.00173377	1.11022e-16	0.00913742	4.88264e-06	50	18	21	4	8	2970	1920	16.9054	8.06339	1.62924	0.801498	0.901686
Zfp609	ENSMUSG00000040524	ENSMUST00000046309	4116	0.000355259	0.00965058	0.157939	0.603162	0.646459	29	14	3	1	1	2487	2214	14.1562	6.75207	1.36429	0.924228	1.03976
Ubr7	ENSMUSG00000041712	ENSMUST00000046404	1915	7.26308e-13	3.72766e-06	0.052258	0.468782	0.780252	84	38	7	3	2	6051	6107	34.4427	16.4281	3.31938	2.54935	2.86802
BC048355	ENSMUSG00000040658	ENSMUST00000046497	563	4.45661e-11	2.8266e-11	0.00278999	0.0388425	0.293234	28	20	4	2	1	1038	739	5.90837	2.81811	0.569413	0.308493	0.347055
Nfya	ENSMUSG00000023994	ENSMUST00000046719	2393	0.00161145	0.0100621	8.04782e-08	1	0.596206	21	11	10	0	1	1759	1931	10.0124	4.77559	0.96493	0.80609	0.906851
Fam168b	ENSMUSG00000037503	ENSMUST00000047534	4201	0.00784617	0.000176912	0.1567	0.254237	0.0152026	34	24	4	3	6	3783	4176	21.5331	10.2706	2.07523	1.74326	1.96117
Dhcr24	ENSMUSG00000034926	ENSMUST00000047973	2348	0	0.000185418	0.0606043	1	0.464189	127	34	7	0	3	6267	5390	35.6722	17.0146	3.43787	2.25004	2.53129
Arrdc4	ENSMUSG00000042659	ENSMUST00000048068	2432	2.62318e-06	0.00111659	0.000177849	0.251354	1	19	9	5	3	0	918	4150	5.22532	2.49232	0.503585	1.73241	1.94896
Ipo8	ENSMUSG00000040029	ENSMUST00000048418	2107	0.000300762	0.00135999	0.61899	0.031805	1	23	13	1	3	0	1759	1630	10.0124	4.77559	0.96493	0.680439	0.765493
Txnip	ENSMUSG00000038393	ENSMUST00000049093	1328	3.9968e-15	6.75604e-07	0.0134337	0.906152	0.0415539	93	33	7	6	17	4507	22500	25.6542	12.2363	2.47239	9.39256	10.5666
Cog3	ENSMUSG00000034893	ENSMUST00000049168	1680	0.0058468	0.0207337	3.46684e-07	1	0.367381	11	6	7	0	1	776	975	4.41705	2.1068	0.425688	0.407011	0.457887
Fbxw8	ENSMUSG00000032867	ENSMUST00000049474	3104	1.88738e-15	6.42193e-05	0.00256835	0.0140025	0.0849056	71	19	6	4	3	2439	2182	13.883	6.62175	1.33796	0.910869	1.02473
Cldn4	ENSMUSG00000047501	ENSMUST00000051401	987	0	0	0.00419037	0.639943	0.318932	90	38	5	1	2	1883	2447	10.7182	5.11224	1.03295	1.02149	1.14918
Ent1	ENSMUSG00000023942	ENSMUST00000051574	468	8.68799e-11	0.00330182	0.000257102	0.00525051	0.347158	49	17	8	5	2	2911	2613	16.5696	7.9032	1.59688	1.09079	1.22714
Lin28a	ENSMUSG00000050966	ENSMUST00000051674	2775	0	0	0.0212536	0.134942	0.865728	257	143	16	10	5	16332	15906	92.9629	44.3405	8.9592	6.63991	7.4699
Tmem186	ENSMUSG00000043140	ENSMUST00000052505	1861	0.0120608	0.000444794	0.415529	1	1	12	10	1	0	0	979	1242	5.57254	2.65793	0.537047	0.518469	0.583278
Ormdl3	ENSMUSG00000038150	ENSMUST00000052919	1456	2.99235e-07	0.0223747	0.351678	1	0.309312	19	6	1	0	1	790	788	4.49673	2.14481	0.433368	0.328948	0.370067
Mlec	ENSMUSG00000048578	ENSMUST00000053271	4931	9.01169e-05	0.000369439	0.0301067	0.91918	0.157022	90	48	11	1	5	10317	6026	58.7251	28.0101	5.65957	2.51554	2.82998
S1pr2	ENSMUSG00000043895	ENSMUST00000054197	1520	1.14608e-12	4.76134e-05	0.0763167	1	0.740319	40	16	3	0	1	1783	2871	10.149	4.84075	0.978095	1.19849	1.3483
Ptpn11	ENSMUSG00000043733	ENSMUST00000054547	3634	1.00889e-09	0.00116055	7.30993e-07	0.0919214	0.0133099	58	23	13	4	6	4086	4052	23.2578	11.0933	2.24145	1.6915	1.90293
Gpr107	ENSMUSG00000000194	ENSMUST00000056433	4435	3.35072e-06	0.000169315	0.582666	0.231039	0.6406	26	14	1	2	1	1593	2179	9.06747	4.32491	0.873868	0.909617	1.02332
Zfp518b	ENSMUSG00000046572	ENSMUST00000057258	2932	4.41869e-14	8.24152e-12	1.56669e-07	0.000131301	0.222977	56	34	12	8	3	2958	3459	16.8371	8.03081	1.62266	1.44395	1.62444
Acap2	ENSMUSG00000049076	ENSMUST00000058033	3933	0.00357261	0.00022645	0.0627994	0.0857116	0.420568	19	14	3	2	1	1640	1162	9.33499	4.45251	0.89965	0.485073	0.545708
Dcaf7	ENSMUSG00000049354	ENSMUST00000058438	4469	0.000385429	0.0114866	0.66242	1	0.756272	42	20	2	0	1	4140	3006	23.5652	11.2399	2.27107	1.25485	1.4117
Pitpnb	ENSMUSG00000050017	ENSMUST00000058552	1806	0	2.22045e-16	0.0160764	1	0.444056	89	52	6	0	2	3621	3206	20.611	9.83082	1.98636	1.33834	1.50563
Ubqln1	ENSMUSG00000005312	ENSMUST00000058735	1713	0.00218002	0.000242039	0.880126	0.0522433	0.789886	37	24	1	4	1	3867	3322	22.0112	10.4987	2.12131	1.38676	1.5601
Edem3	ENSMUSG00000043019	ENSMUST00000059498	3615	0.000441743	0	2.94434e-05	0.274286	0.302794	16	26	6	1	1	1040	768	5.91975	2.82354	0.57051	0.320599	0.360674
Pygo2	ENSMUSG00000047824	ENSMUST00000060061	1614	8.47196e-06	0.0143037	0.684513	0.212138	0.00315215	30	12	1	2	5	2103	2055	11.9704	5.70953	1.15364	0.857854	0.965085
Rabgap1	ENSMUSG00000035437	ENSMUST00000061179	1550	9.00308e-08	0.00102705	0.329617	0.044276	0.311579	19	8	1	2	1	729	795	4.14952	1.97919	0.399906	0.33187	0.373354
1810026J23Rik	ENSMUSG00000048429	ENSMUST00000062125	2108	0.0102322	0.0180953	0.000586788	1	1	14	8	5	0	0	1195	1837	6.80202	3.24436	0.655538	0.76685	0.862706
Zfp217	ENSMUSG00000052056	ENSMUST00000063710	2038	7.47883e-07	7.14705e-05	0.192324	0.507572	0.190115	26	14	2	1	2	1464	1697	8.33319	3.97468	0.803102	0.708408	0.796959
Mtap1b	ENSMUSG00000052727	ENSMUST00000064762	4342	0.00100841	1.83827e-05	0.147472	0.0988228	0.127801	37	26	4	3	3	3692	2626	21.0151	10.0236	2.02531	1.09622	1.23324
Nudcd3	ENSMUSG00000053838	ENSMUST00000066496	2554	6.39046e-06	0.0363564	0.0474725	1	0.0790109	43	16	5	0	4	3538	3410	20.1385	9.60547	1.94083	1.42349	1.60143
Vapb	ENSMUSG00000054455	ENSMUST00000067530	6115	9.51444e-07	0.0312916	0.00199512	1	0.131484	27	9	5	0	2	1580	1339	8.99347	4.28961	0.866736	0.558962	0.628832
Trib1	ENSMUSG00000032501	ENSMUST00000067543	1849	5.52277e-05	0.020056	0.344526	0.54417	0.586807	15	6	1	1	1	770	1882	4.38289	2.09051	0.422397	0.785635	0.88384
Rara	ENSMUSG00000037992	ENSMUST00000068133	1305	5.40933e-05	0.00812045	0.495714	1.00252e-07	0.0230408	20	9	1	8	3	1248	1276	7.1037	3.38825	0.684612	0.532662	0.599245
Rlim	ENSMUSG00000056537	ENSMUST00000070705	5328	2.33574e-06	3.80806e-14	0.0407759	0.740547	0.0137076	72	60	8	3	10	6951	9245	39.5656	18.8716	3.81309	3.8593	4.34171
Nf1	ENSMUSG00000020716	ENSMUST00000071325	3216	0.000605294	0.00117378	0.270922	1	1	11	7	1	0	0	576	445	3.27863	1.56381	0.315975	0.185764	0.208984
Commd7	ENSMUSG00000056941	ENSMUST00000071852	2503	2.83871e-05	0.013392	0.166045	0.000450823	1	10	4	1	3	0	331	346	1.88407	0.898647	0.181576	0.144437	0.162491
Myst2	ENSMUSG00000038909	ENSMUST00000072621	1527	4.68623e-05	0.0272412	0.310601	3.89743e-05	0.000453208	53	22	4	12	11	5125	6737	29.1719	13.9141	2.81141	2.81234	3.16388
Atxn7l3	ENSMUSG00000059995	ENSMUST00000073234	2355	1.03532e-10	8.77489e-05	0.00592515	0.00189208	0.00360131	58	25	7	7	7	3836	4079	21.8348	10.4145	2.1043	1.70277	1.91561
Fnip2	ENSMUSG00000061175	ENSMUST00000076136	3692	0.000141855	0.000155442	0.00328803	1	1	24	15	5	0	0	1777	1188	10.1148	4.82446	0.974804	0.495927	0.557918
Pmpca	ENSMUSG00000026926	ENSMUST00000076431	1534	0.00721816	1.70313e-05	0.0112832	1	0.34022	24	20	5	0	2	2404	2572	13.6837	6.52673	1.31876	1.07367	1.20788
Gpn1	ENSMUSG00000064037	ENSMUST00000076949	1992	5.33846e-11	0.0136975	0.0591487	0.166338	1	35	10	3	2	0	1599	1749	9.10162	4.3412	0.877159	0.730115	0.821379
Tcfe3	ENSMUSG00000000134	ENSMUST00000077680	1271	0.000101922	0.00445663	0.265669	1	1	37	18	3	0	0	3256	4528	18.5334	8.83986	1.78613	1.8902	2.12648
Unc5b	ENSMUSG00000020099	ENSMUST00000077925	2598	0.0220194	1.15391e-05	0.0119038	0.297535	0.0608308	16	16	4	1	2	1581	846	8.99916	4.29233	0.867285	0.35316	0.397305
Rpl7l1	ENSMUSG00000063888	ENSMUST00000078286	1841	1.06412e-05	0.00190947	0.964919	0.949257	1	63	30	1	1	0	6107	7141	34.7615	16.5802	3.3501	2.98099	3.35361
Tor3a	ENSMUSG00000060519	ENSMUST00000079625	2076	1.43199e-06	0.00278683	0.114595	0.4638	0.0342822	21	9	2	1	3	1053	1493	5.99375	2.85884	0.577641	0.623248	0.701154
Sult4a1	ENSMUSG00000018865	ENSMUST00000082365	1373	1.01435e-07	0.00316523	0.00987232	0.446285	0.143732	28	11	4	1	2	1495	1416	8.50964	4.05884	0.820108	0.591105	0.664993
Pgd	ENSMUSG00000028961	ENSMUST00000084124	653	1.54367e-05	0.012088	0.00778825	1	0.682954	38	16	6	0	1	3081	2446	17.5373	8.36474	1.69014	1.02108	1.14871
Rqcd1	ENSMUSG00000026174	ENSMUST00000087215	1990	3.18653e-10	0.000300922	5.2515e-06	0.849462	1	60	25	12	1	0	4169	4536	23.7302	11.3186	2.28698	1.89354	2.13023
Ncoa3	ENSMUSG00000027678	ENSMUST00000088095	3099	3.97485e-05	4.47208e-10	0.235844	0.264585	0.324634	60	47	5	3	3	6000	4269	34.1524	16.2897	3.2914	1.78208	2.00484
Mfap1a	ENSMUSG00000068479	ENSMUST00000089926	2754	1.88254e-05	0.00382158	0.254339	1	1	13	6	1	0	0	535	773	3.04526	1.4525	0.293483	0.322687	0.363022
Psrc1	ENSMUSG00000068744	ENSMUST00000090561	577	0.00176118	0.000417729	0.0169854	0.232854	1	14	10	3	1	0	971	635	5.527	2.63621	0.532659	0.265079	0.298214
Tnpo2	ENSMUSG00000031691	ENSMUST00000093360	2053	6.21725e-15	1.15654e-06	6.98314e-05	0.5915	0.654992	77	33	11	2	2	4623	4769	26.3144	12.5512	2.53603	1.9908	2.23966
Ccnd1	ENSMUSG00000070348	ENSMUST00000093962	2676	2.70263e-07	0.000322335	0.00461756	0.533185	0.101176	82	39	11	3	6	7791	6734	44.3469	21.1521	4.27389	2.81109	3.16247
Cdc25a	ENSMUSG00000032477	ENSMUST00000094324	1669	2.15783e-08	5.48763e-05	0.00021475	0.84252	0.875009	43	21	8	1	1	2833	4428	16.1256	7.69144	1.55409	1.84846	2.07951
AI597468	ENSMUSG00000060935	ENSMUST00000095383	3053	0.000222481	0.0345409	0.381893	1	0.216306	15	6	1	0	1	877	519	4.99194	2.38101	0.481093	0.216655	0.243737
Csrp1	ENSMUSG00000026421	ENSMUST00000097561	1112	2.09533e-05	0.0257297	0.62232	0.630811	0.308653	26	10	1	1	2	1775	2387	10.1034	4.81903	0.973707	0.996446	1.121
Klhl21	ENSMUSG00000073700	ENSMUST00000097773	2052	0.00024887	0.0360755	0.589477	1	1	22	9	1	0	0	1623	1320	9.23823	4.40636	0.890325	0.55103	0.619909
Fnbp1l	ENSMUSG00000039735	ENSMUST00000098637	3384	0.00064843	2.22063e-06	0.154818	0.0234321	0.00777988	28	22	3	4	5	2463	2558	14.0196	6.68691	1.35112	1.06783	1.20131
Ddx6	ENSMUSG00000032097	ENSMUST00000098836	4250	5.87283e-05	7.54429e-08	0.891531	0.647115	1.9509e-05	85	57	3	4	17	9487	10631	54.0007	25.7567	5.20426	4.43788	4.99261
mKIAA1376	ENSMUSG00000074794	ENSMUST00000099356	2603	5.11338e-11	0	0.0148215	0.37319	3.95343e-06	46	43	5	4	15	2578	7405	14.6742	6.99913	1.41421	3.0912	3.47759
Ddi2	ENSMUSG00000078515	ENSMUST00000102484	8128	0.00412925	0.000608845	0.000697694	0.496933	0.575542	45	28	10	3	3	5142	6376	29.2686	13.9602	2.82073	2.66164	2.99435
Rpa2	ENSMUSG00000028884	ENSMUST00000102561	878	0	0.000156492	0.662676	1	0.735395	67	16	1	0	1	1981	2831	11.276	5.37831	1.08671	1.18179	1.32952
Cdca7	ENSMUSG00000055612	ENSMUST00000102691	1143	0.000145711	0.00046167	0.015034	1	0.825133	39	22	6	0	1	3566	3713	20.2979	9.68149	1.95619	1.54998	1.74373
Mcm10	ENSMUSG00000026669	ENSMUST00000102985	1679	6.88338e-15	1.46131e-06	0.0143257	1	0.627191	42	18	4	0	1	1672	2101	9.51714	4.53939	0.917204	0.877056	0.986688
Tmem222	ENSMUSG00000028857	ENSMUST00000105907	789	5.96705e-09	0.000967774	0.389308	1	0.108398	23	9	1	0	2	899	1189	5.11717	2.44074	0.493162	0.496344	0.558388
Rcc1	ENSMUSG00000028896	ENSMUST00000105951	904	3.88578e-15	3.26698e-05	1.28553e-05	0.765283	1	78	26	11	1	0	3824	3472	21.7665	10.3819	2.09772	1.44938	1.63055
Cdc42ep4	ENSMUSG00000041598	ENSMUST00000106616	1664	5.85347e-07	0.0337668	0.0393337	1	1	25	8	3	0	0	1351	1299	7.68999	3.66789	0.741114	0.542264	0.610047
Pak4	ENSMUSG00000030602	ENSMUST00000108283	831	5.85347e-07	0.0130241	0.523417	1	1	25	9	1	0	0	1351	1160	7.68999	3.66789	0.741114	0.484239	0.544768
Ntn1	ENSMUSG00000020902	ENSMUST00000108674	3637	0.00200812	0.0492835	2.54469e-11	0.0704314	0.822652	38	17	18	4	1	3982	3683	22.6658	10.8109	2.18439	1.53746	1.72964
Epn2	ENSMUSG00000001036	ENSMUST00000108711	2169	2.72685e-06	2.54675e-07	0.555002	0.172378	0.00174908	25	18	1	2	5	1476	1790	8.40149	4.00726	0.809685	0.74723	0.840634
Dnajc5	ENSMUSG00000000826	ENSMUST00000108797	2856	2.87419e-09	1.60909e-07	0.0161485	0.0996376	0.0151707	43	25	5	4	6	2636	4174	15.0043	7.15659	1.44602	1.74242	1.96023
Rnf114	ENSMUSG00000006418	ENSMUST00000109214	1435	2.40005e-07	0.00067035	0.0275519	1	1	33	15	4	0	0	2049	3337	11.6631	5.56292	1.12401	1.39302	1.56715
B4galt5	ENSMUSG00000017929	ENSMUST00000109221	2892	1.64185e-05	0.00367123	0.249326	0.243981	1	26	12	2	1	0	1749	670	9.95543	4.74844	0.959444	0.279689	0.314651
B3gnt7	ENSMUSG00000079445	ENSMUST00000113306	1076	2.02376e-11	6.3654e-05	0.345779	0.788367	0.825707	43	18	2	1	1	2230	3720	12.6933	6.05433	1.2233	1.5529	1.74702
Tmbim1	ENSMUSG00000006301	ENSMUST00000113796	1119	6.02438e-09	0.0109446	0.0293645	4.02495e-05	0.00124417	17	5	2	4	3	482	438	2.74358	1.3086	0.264409	0.182842	0.205697
Wdr5	ENSMUSG00000026917	ENSMUST00000113952	1678	5.66214e-15	3.83756e-05	1.80522e-13	0.0235616	0.00370434	134	35	24	6	8	6001	5201	34.1581	16.2924	3.29195	2.17114	2.44253
Diap1	ENSMUSG00000024456	ENSMUST00000115631	1738	0	5.29274e-05	0.000619733	0.512261	1	100	27	9	2	0	4172	4115	23.7473	11.3267	2.28862	1.71779	1.93252
Rnf44	ENSMUSG00000034928	ENSMUST00000125871	2348	0	0.000867641	6.02937e-05	4.90433e-05	0.0220621	108	35	14	11	7	7128	5835	40.5731	19.3521	3.91019	2.4358	2.74028
G3bp2	ENSMUSG00000029405	ENSMUST00000164378	2635	4.7745e-05	0	0.305839	0.00752163	0.532215	158	139	13	16	9	19961	18969	113.619	54.193	10.95	7.91855	8.90837
mKIAA1835	ENSMUSG00000022391	ENSMUST00000171115	571	2.86765e-11	0.00167259	0.0646552	0.0992422	0.709337	48	17	4	3	1	2720	2631	15.4824	7.38465	1.4921	1.0983	1.23559
Erc1	ENSMUSG00000030172	uc009dmk.1	4829	0.0291475	7.11232e-05	0.309152	0.585208	0.260553	19	17	2	1	2	2046	2108	11.646	5.55478	1.12237	0.879978	0.989976
n/a	ENSMUSG00000080049	uc009nlp.1	407	1.63203e-14	0.0424159	0.014872	1	0.000365267	31	6	3	0	5	923	1256	5.25378	2.50589	0.506328	0.524313	0.589853
Tle3	ENSMUSG00000032280	uc009pzo.1	1781	0	0.000213452	0.0321667	0.00293769	0.0283384	44	12	3	4	3	1246	1384	7.09232	3.38282	0.683515	0.577747	0.649965
Zfp445	ENSMUSG00000047036	uc009sfe.1	891	7.36954e-05	0.00725339	0.285571	1	0.285222	13	6	1	0	1	613	715	3.48924	1.66426	0.336272	0.298475	0.335784

## Sheet: CDS bound genes
High confidence Upf1 target genes, CDS binding
				pval calls for CLIP libraries					Unique barcoded CLIP reads					mRNA-Seq reads		lambda calculations for pval calling
Gene name	Gene	Transcript	CDS length	pval Upf1.A1	pval Upf1.I	pval Upf1.A2	pval Upf1.CHX.A1	pval Upf1.CHX.A1	Upf1.A1	Upf1.I	Upf1.A2	Upf1.CHX.A1	Upf1.CHX.A2	v6.5 NoCHX	v6.5 CHX	lambda Upf1.A1	lambda Upf1.I	lambda Upf1.A2	lambda Upf1.CHX.A1	lambda Upf1.CHX.A2
2610507B11Rik	ENSMUSG00000010277	ENSMUST00000010421	6702	0.00236124	2.23935e-06	0.00505588	0.200819	0.000356474	17	18	5	11	19	21241	19561	7.64025	4.68308	1.08084	8.16496	7.60219
Canx	ENSMUSG00000020368	ENSMUST00000020637	1773	0.000447886	1.986e-05	5.07306e-05	0.00529296	0.00295901	17	15	7	13	13	18137	13464	6.52376	3.99873	0.92289	5.62001	5.23265
Eif4a2	ENSMUSG00000022884	ENSMUST00000023599	1221	1.82904e-11	0.0427891	0.352611	0.318849	0.505971	21	5	1	10	8	8545	19840	3.07358	1.88395	0.434807	8.28142	7.71063
Pias3	ENSMUSG00000028101	ENSMUST00000029743	1752	0.000566011	0.0218362	0.0506265	0.384835	1	4	2	1	1	0	1021	1164	0.367247	0.225103	0.051953	0.485865	0.452377
Akr1a4	ENSMUSG00000028692	ENSMUST00000030455	975	0	3.42195e-08	0	0.603018	1	46	11	13	2	0	5125	4872	1.84343	1.12993	0.260783	2.03362	1.89346
Grinl1a	ENSMUSG00000032199	ENSMUST00000034720	1098	2.02384e-06	4.31857e-06	0.0482534	1	1	13	10	2	0	0	6845	7447	2.4621	1.50914	0.348304	3.10845	2.8942
Phip	ENSMUSG00000032253	ENSMUST00000034787	5463	0.000334476	0.00804284	0.0141036	0.863903	0.843848	7	4	2	1	1	3501	4778	1.25929	0.771877	0.178146	1.99439	1.85692
Ktelc1	ENSMUSG00000034064	ENSMUST00000036210	1176	0.000703027	0.00895292	0.00437404	1	0.0010507	5	3	2	0	5	1898	1924	0.682698	0.418459	0.0965786	0.803097	0.747744
Ralgapb	ENSMUSG00000027652	ENSMUST00000046274	4473	0.000309537	0.00232194	0.00717108	0.252615	0.0631282	6	4	2	2	3	2453	2320	0.882328	0.540821	0.124819	0.968392	0.901646
Pitpnb	ENSMUSG00000050017	ENSMUST00000058552	816	9.59016e-05	0.00988159	3.87578e-06	0.0435679	0.512943	6	3	4	3	1	1969	1851	0.708236	0.434112	0.100191	0.772626	0.719373
Azin1	ENSMUSG00000037458	ENSMUST00000065308	1344	1.11022e-16	9.1504e-09	0.00768949	1.97064e-07	0.038839	29	9	2	11	4	2544	3232	0.91506	0.560884	0.12945	1.34907	1.25609
Dph1	ENSMUSG00000038268	ENSMUST00000071562	675	0.00192466	0.00980889	0.000563091	1	1	3	2	2	0	0	667	695	0.239916	0.147056	0.0339399	0.2901	0.270105
Mapk7	ENSMUSG00000001034	ENSMUST00000079080	2418	0.0358659	9.3081e-05	0.00477024	0.000123015	1	3	5	2	6	0	1985	1777	0.713992	0.43764	0.101006	0.741738	0.690614
Gpx1	ENSMUSG00000063856	ENSMUST00000082429	603	3.33067e-16	0.000338383	3.01827e-06	0.899311	0.487666	65	10	7	2	4	11634	9298	4.18467	2.56499	0.591989	3.88108	3.61358
Rsc1a1	ENSMUSG00000040715	ENSMUST00000105782	1746	0	0	1.01978e-08	0.782698	0.415484	32	22	6	1	2	2796	3657	1.0057	0.616444	0.142273	1.52647	1.42126
Eif4g2	ENSMUSG00000005610	ENSMUST00000106666	2604	0	6.16212e-09	8.50985e-07	4.63252e-06	0.00948926	106	36	14	42	29	52209	46008	18.7792	11.5107	2.65662	19.2042	17.8806
Atf4	ENSMUSG00000042406	ENSMUST00000109605	1047	0	0	0.000945939	0.21342	0.00312924	72	32	5	12	18	14348	21960	5.16088	3.16335	0.730089	9.16633	8.53454
